# Supplementary material for: Cell Fate Decision as High-Dimensional Critical State Transition
Source: PLoS Biol. 2016 Dec 27;14(12):e2000640. doi: 10.1371/journal.pbio.2000640 (PMC5189937; doi:10.1371/journal.pbio.2000640)
Supplement: S1 Data — The quantification cycles (Cq's) for all analyzed single-cells as well as 100-cell-pool control samples are reported. Single cells from untreated EML control cells as well as EML cells treated with EPO, GM-CSF/IL-3 or a combination of all cytokines on d1, d3 and d6 of stimulation. Gene expression data for single-cell samples sorted from α, β and γ subpopulations generated upon GM-CSF/IL-3 treatment of EML are also included. 6 replicates of the 100-cell samples were also sorted from each fraction and/or subpopulation and analyzed as control. (XLSX) [file pbio.2000640.s012.xlsx]

## Sheet: Control-untreated (d0)
		There are 3 tech replicates/assay for each sample
		Technical Replicate 1																		Technical Replicate 2																		Technical Replicate 3
		Pu.1	Hba-a1	Egr2	ckit	TBP	CD11b	Runx1	Scl	EpoR	CEBPa	Gfi1	Eklf	cMyb	cJun	Fog1	Gata2	Fli1	Gata1	Pu.1	Hba-a1	Egr2	ckit	TBP	CD11b	Runx1	Scl	EpoR	CEBPa	Gfi1	Eklf	cMyb	cJun	Fog1	Gata2	Fli1	Gata1	sfpi1	Hba-a1	Egr2	ckit	TBP	CD11b	Runx1	Scl	EpoR	CEBPa	Gfi1	Eklf
EML - Sca1 LOW (L)	1	23.113	26.437		22.066	24.267		21.557	22.424					21.484		25.15	20.298	24.982	24.67	22.529			25.143	24.454		21.179	21.991				25.672	21.881		23.881	19.94		26.955	23.763	27.49		23.68	25.519		21.366	21.61				26.451
EML - Sca1 LOW (L)	2	23.037	27.296		20.941	24.031		21.816	20.567					21.602		22.331	20.239			23.661	27.722		21.456	22.73		22.447	21.001	27.886				21.567		22.372	20.992	25.317		23.428			21.388			23.043	21.463	27.429
EML - Sca1 LOW (L)	3	24.167	28.398		21.745	25.242		21.252	19.694					22.498		23.386	20.451	27.149		24.569	28.875		21.741	24.411		22.078	20.216	26.744				21.953		24.338	20.578	25.636		25.74			22.071	22.867		22.514	19.981
EML - Sca1 LOW (L)	4	24.269	28.572		23.971			21.67	21.638					22.74			20.61	25.611	27.475				23.604	25.348		23.764	21.914					22.613		24.73	20.173		26.361		29.256		22.367	24.381		22.076	22.129
EML - Sca1 LOW (L)	5	23.741			22.703	22.807		22.878	20.786					21.72		26.114	21.419			23.379			22.363	25.65		23.3	21.818					22.667			21.895			23.771			21.336	25.317		23.132	21.863
EML - Sca1 LOW (L)	6				25.403	25.644		23.518	22.992					24.316			20.187	25.83		25.897			25.196				22.193					24.397			20.176		26.403	24.306			25.101			25.889	24.312
EML - Sca1 LOW (L)	7	23.83			23.004	23.783		24.963	21.86	26.945				22.456		24.818	22.691	25.633		24.794			23.106	23.142		25.374	22.329					23.76		23.277	22.03			26.856			22.655	23.881			22.112	26.982
EML - Sca1 LOW (L)	8	25.257	23.524		25.167	23.59		25.101	21.926					23.398		23.124	19.795		26.946	25.708	24.353		24.083	24.491			23.135					21.994		22.453	20.235		27.751		24.264		24.291	23.219			24.064
EML - Sca1 LOW (L)	9	24.736	27.395	26.469	20.607	22.749		23.123	19.953	26.756			26.343	21.527		23.754	20.614		24.559	23.248	26.711	26.39	20.408	22.82		22.49	20.625				24.796	21.421		23.214	20.834	25.537	25.194	24.955	26.756		20.65	23.988		23.099	21.13
EML - Sca1 LOW (L)	10	23.457	24.051	25.874		19.628	24.427		21.163	20.672					23.285		20.996	18.662	28.522	23.652	24.021	26.663		20.191	25.484		21.836	21.456	27.093				23.82		20.687	18.795		22.881	24.101	25.587		19.551	25.019		22.74	21.375
EML - Sca1 LOW (L)	11	22.8				24.012	24.99		24.986	22.84					25.423		24.52	19.522						25.214	25.238		24.802	23.775				24.451	26.422			19.164		26.278	27.285			25.457	24.455		25.511	23.859
EML - Sca1 LOW (L)	12		26.363		24.023			23.135	23.626					25.111		23.712			25.057		27.443		23.581				22.289				25.696	25.359			22.916		25.817		28.902		22.414			22.729	22.146
EML - Sca1 LOW (L)	13								24.574					23.408									24.7												24.421			25.531			25.009				24.804
EML - Sca1 LOW (L)	14	24.811			23.26	25.287			22.832					21.621		22.441	22.19		27.561	25.844							22.432					22.669		24.002	22.192			24.44			24.023	25.512		24.49	22.654	26.837
EML - Sca1 LOW (L)	15	26.023	22.702					23.743	24.323					23.987		25.045			27.178	24.662	22.66		24.072	24.321		25.263	22.501					23.882		24.89			26.541	24.702	22.099			23.05		25.419	22.883				26.547
EML - Sca1 LOW (L)	16	25.573	21.963		23.081	24.128		24.423	22.572					23.716		23.411			25.665		22.034		26.072	22.964		24.495	22.614					25.276		23.82			27.386		21.997		24.191			23.238	24.254
EML - Sca1 LOW (L)	17		26.868		24.297			25.633	22.27								24.7		27.543	25.798	28.979		26.221			25.33	23.095					24.376			22.168			26.347						24.868	24.4
EML - Sca1 LOW (L)	18	23.824			24.122	23.291			23.019					23.257		24.906	24.675				28.342		22.906	25.184			23.381					22.335						25.063						26.531	24.33
EML - Sca1 LOW (L)	19	23.615	21.848		22.68	25.321		22.762	21.332	26.865			24.909	22.152		24.024	19.534	25.642	26.296	24.162	21.957		22.914	23.984		23.081	22.005				25.378	23.66		22.553	19.108		24.933	23.758	21.958		22.923	23.855		22.368	21.821	26.763			24.841
EML - Sca1 LOW (L)	20		27.645		25.157	24.37		22.884	23.08				26.668	24.107			21.228				28.656		24.097	25.784		23.27	22.845					22.721		23.882	20.992				28.659		23.384	25.267		23.6	23.008
EML - Sca1 LOW (L)	21		29.823	24.324	23.621	25.642		22.408	20.848					23.168			21.59	25.495			27.323	26.301	23.62	22.913		22.631	20.839					22.827			22.996				28.843	25.433	24.045	22.564		23.73	21
EML - Sca1 LOW (L)	22	25.64	27.745		23.62		25.817	25.259	23.061					22.743			22.891	25.571		23.226	26.782		22.721		24.882	24.416	22.004					22.608		24.813	22.686			24.355	28.512		22.202	25.362	25.699		22.295
EML - Sca1 LOW (L)	23	23.527	29.063		23.699	23.969		23.491	21.466					23.458		24.682	19.427		26.086	23.569			25.187	24.61		22.547	21.279					24.13		22.946	19.763		27.29	24.427			22.598	23.371		24.33	21.92
EML - Sca1 LOW (L)	24	23.53			22.985	23.483		24.763	21.741	26.745				22.056		24.418	22.791	25.733		24.544			23.106	23.342		25.444	22.129					23.016		23.777	22.703			25.856			22.542	23.781			22.012	26.782
EML - Sca1 LOW (L)	25	25.421	28.221		22.193	24.523		23.981	21.681				26.123	21.706		26.471	20.556			23.64	27.027		21.989	23.647		22.93	21.247					22.139		29.987	21.92			24.511	28.431		22.858			23.213	22.45
EML - Sca1 LOW (L)	26		33.514		23.699	25.752		25.103	21.896					22.882			21.075		25.542	24.532	34.198		22.637			23.663	21.489					21.55			21.192			25.653			22.9	24.456		25.165	21.114				27.613
EML - Sca1 LOW (L)	27	26.446	32.506		22.062			22.782	22.945					21.757		30.751	20.952	26.201		25.526	32.771	26.281	21.347	24.155		24.901	21.498			26.742		22.724		30.914	20.82	26.317		26.526	32.152		22.66	25.168		24.165	20.641				26.123
EML - Sca1 LOW (L)	28		26.324		22.527			25.176	21.827					22.18		30.923	21.832			25.62	29.395		22.696	25.049			20.922					22.443			21.916	23.598		25.346	29.503		24.088			22.494	21.088
EML - Sca1 LOW (L)	29	23.498	30.732		22.083	24.336		23.67	21.896					21.596		31.297	21.172	25.32	25.872	24.754	31.679		22.073			24.472	22.41					22.381		31.215	21.044				32.503		21.776			25.928	21.789
EML - Sca1 LOW (L)	30	25.759	26.714		22.148	24.428		23.803	21.994					22.799			20.112			25.755	27.063		22.137	25.398		22.791	22.684					24.547		23.769	20.448	25.326		24.536	27.936		22.317	23.846		23.541	21.852
EML - Sca1 LOW (L)	31	25.788	27.126		23.125	24.52		25.416	22.123				25.559	23.373		23.995	20.765		26.324	26.597	28.005		22.802	24.128	26.544	24.093	22.509				26.5	22.041		25.916	21.175	24.325	27.909	23.744	26.72		22.881			24.095	21.961
EML - Sca1 LOW (L)	32	25.648	26.511		22.986	24.978		25.911	20.193	27.115				23.032			19.935	26.265	26.13	25.577	26.492		22.024	25.692		23.53	22.262					21.29		23.808	21.764	25.194		25.555	26.597		22.09	25.679		23.205	21.697	27.85			26.526
EML - Sca1 LOW (L)	33	24.588	27.346		21.866			23.926	21.242					22.425		23.294	21.73			26.286	27.336		24.211	25.281		24.099	21.118					21.282			21.024		27.357		27.14		21.758	25.22		23.281	24.665			27.23
EML - Sca1 LOW (L)	34	26.25		26.358	23.349	26.294		23.964	20.898	27.111			26.991	22.568		26.887	20.113		25.456		28.649		20.976	25.411		23.738	21.394				26.637	20.651		30.342	21.461	24.26		25.278	29.144	32.18	23.692	25.51		23.86	22.692	29.462
EML - Sca1 LOW (L)	35		31.049		24.751	24.448	27.431		23.538					24.258			21.348	30.139			30.885		22.153	24.31	27.115	23.405	22.961					23.278		27.325	22.492			25.607	33.647		22.608	23.425			21.707
EML - Sca1 LOW (L)	36				23.086	23.75		23.277	20.957				26.007	24.79			21.196		26.308				22.638	23.929		23.425	21.784					22.082			20.937						22.449			24.258	21.242
EML - Sca1 LOW (L)	37	24.469			22.619			25.649	22.868					22.952			20.965		25.921	24.458			22.058			25.523	21.719					22.578			21.322		26.684	26.703			23.037			24.847	22.836
EML - Sca1 LOW (L)	38	26.676	30.809	26.347	22.482	23.955		23.927	22.015					24.156		29.771	22.617		27.187		32.011		22.25	25.592		24.364	21.312					22.476		30.468	21.277		26.263	26.591	30.693		24.377			23.331	22.712
EML - Sca1 LOW (L)	39	25.561			22.743	24.25		23.374	21.644					23.406		23.744	21.008			25.256	26.035	26.741	22.872			23.343	22.319				26.571			24.141	21.333			25.963	27.135		21.892	25.622		24.796	22.576				24.861
EML - Sca1 LOW (L)	40	23.777		24.017			24.119	21.233				25.999	24.642		26.744	21.218			26.241	25.638		24.183			25.12	21.924				25.756	24.263			20.498			26.158	24.144		24.088			24.451	20.59	23.921				24.65
EML - Sca1 LOW (L)	41	23.829			22.529	25.035		23.245	21.248					22.235			20.928		25.153	24.175			22.753	26.225		22.756	21.308					22.446			21.241		26.14	25.56	33.72	28.15	22.842	24.092		25.481	21.726
EML - Sca1 LOW (L)	42	24.052			22.811	24.669		23.143	21.924				26.182	22.038			21.034	25.693	26.735	25.668		27.456	22.261			24.512	22.041					21.968			21.552		25.897	25.496			21.58			24.348	21.778
EML - Sca1 LOW (L)	43	24.894	31.044					25.208	22.86					22.128		29.261	22.105		25.449	24.09	30.046		22.325	25.274		22.337	21.747					23.486		27.225	21.259			25.819	30.891		23.257	26.282	26.538	22.193	22.422
EML - Sca1 LOW (L)	44		29.868		23.013			23.81	22.547					22.615			21.494		28.799	26.118	29.737		22.974	24.892		22.865	21.575					22.942		29.001	21.198		26.2	25.081	30.097		25.197	25.049		24.643	22.254
EML - Sca1 LOW (L)	45	24.031			20.874	26.55		26.283	26.713					22.47			19.79	29.204	28.733	26.049	33.201		21.253	25.667		26.922	26.617					23.193			22.844	26.24		26.081	32.011		25.621	25.552		26.277	26.086				27.5
EML - Sca1 LOW (L)	46	26.093	27.474		23.567	25.251	31.732	22.791	20.838	27.539				23.133		28.787	21.908		28.135	23.18	29.825		22.692	25.642		24.487	27.397				26.364	24.607		26.175	20.907		28.425		26.412	28.443	26.83	25.204		29.893	24.117	27.577
EML - Sca1 LOW (L)	47		28.884		22.606	23.141		22.775	21.685	31.929				23.25		30.959	21.193	24.039	26.525	24.955	30.206		22.712	23.693		22.213	24.214					22.917		32.826	20.656		26.278	24.983	26.483	27.214	23.887	25.238		21.888	22.06	27.97
EML - Sca1 LOW (L)	48	24.542	22.963		23.054	24.142		24.452	22.542					23.775		23.414			25.665	24.521	22.041		26.045	22.912		24.411	22.615					25.21		23.52			27.312		22.974		24.142			23.275	24.274
EML - Sca1 LOW (L)	49	23.735	27.342	26.478	20.641	22.752		23.142	19.975	26.757			26.375	21.542		23.742	20.642		24.459	22.241	26.741	26.342	20.441	22.11		22.452	20.645				24.711	21.411		23.275	20.815	25.512	25.111	23.944	26.741		20.41	23.9		23.098	21.101
EML - Sca1 LOW (L)	50	24.624	26.552		22.984	24.942		25.987	20.125	27.421				23.011			19.94	26.211	26.141	24.512	26.414		22.01	25.612		23.522	22.245					21.401		23.842	21.742	25.122		24.577	26.558		22.1	25.607		23.28	21.611	27.852			26.527
EML-Sca1 MID (M)	51				20.379	22.883		22.141	19.666					20.625		24.222	19.693			24.197			20.309	22.361			18.066					20.935			18.867			23.58	28.725		20.786			21.78	19.602	26.525
EML-Sca1 MID (M)	52	23.19	28.582		21.897	22.934		21.275	21.034			26.675		21.967		25.778	22.656			23.562			21.75	22.934		21.391	21.419					21.44		24.842	21.989	26.472		23.862	27.662		21.491	23.964		21.54	20.962
EML-Sca1 MID (M)	53				23.636	25.648			22.395					24.372			23.25		27.796				22.836			26.359	23.799							25.082	23.615						22.808	25.661		24.901	23.136				26.35
EML-Sca1 MID (M)	54						25.276	24.507	22.773					23			23.047	24.87			28.955		24.092			23.785	22.779					24.221	27.531	24.846	22.443				28.956		24.578			22.856	23.034
EML-Sca1 MID (M)	55	25.556	28.785		22.767	23.564		22.364						22.466			22.633			24.804	29.459		22.825	25.474	27.119	22.254	22.642					22.433		24.083	22.452			24.495	27.59			24.278		23.043	23.057
EML-Sca1 MID (M)	56	24.746	28.552		25.201			24.958	22.938					23.124		25.016	22.569	25.194		24.847			25.082	25.542		23.835	22.461					23.354		25.016	22.402			23.733	29.036		25.042			24.647	22.323
EML-Sca1 MID (M)	57	24.009			22.604	24.285		25.081	21.461					21.904		26.026	19.286	25.223		24.2			22.385	24.253		25.456	21.277				26.561	22.019		23.987	19.654	25.204	27.465	24.967			21.812	24.316		26.11	22.053
EML-Sca1 MID (M)	58	25.652	23.769		22.063	25.385		22.614	24.454					22.7		25.316	20.994			25.763	24.639		21.724	23.475		22.288	22.399			27.089		22.019		24.179	20.847	24.861	27.911	25.696	24.234		21.171	22.705		23.015	23.877				26.465
EML-Sca1 MID (M)	59	25.58	27.676		25.192			22.072	23.135					21.985		24.093	21.52			24.749	27.137		22.745	23.101		23.91	23.079					22.708			21.511		26.3	25.063	26.506		23.071	24.203		24.11	22.854
EML-Sca1 MID (M)	60	25.139	28.587		23.105	23.185		23.268	23.026	26.811				23.258			24.608	25.267		24.789			24.975			23.424	23.148					22.899		24.899	21.857		28.454	24.916			23.396			23.348	22.561
EML-Sca1 MID (M)	61	24.269	28.534		21.644	25.406	26.682	22.322	21.357	27.936		26.534		21.621		24.026	21.612			24.056	28.837		20.873	23.979	26.718	23.27	20.947					21.222		23.632	20.696		26.701	24.563			20.969	23.799		23.101	21.724			27.197
EML-Sca1 MID (M)	62	24.42	26.807		22.704			23.36	21.774					21.753		23.718	21.319		27.581	26.1	26.897		22.572	24.135		22.98	21.544		25.457			21.561		22.885	20.572	24.414	27.219	24.786	26.667		21.539	25.563		22.979	21.559
EML-Sca1 MID (M)	63	23.048			21.885	23.222		21.862	22.626			25.92		20.606		24.577	20.462	24.219		23.83			20.833	24.28		21.612	22.474			26.464		20.461	25.445	21.064	20.011	25.413		23.362	27.478		20.844	22.01		20.163	20.563			25.855
EML-Sca1 MID (M)	64	23.655	27.723		22.839		26.59	23.147	22.28					23.548		24.893	22.964			23.634	27.761		22.533		26.874	21.775	22.325					22.622			22.756			24.46	29.45		22.044	25.079	26.288	21.403	21.12
EML-Sca1 MID (M)	65	24.302	28.284		22.166				22.774					26.092		24.167	22.638			23.778	28.911		23.518				22.643					22.878			22.171			24.715			21.556	25.18		26.76	22.035
EML-Sca1 MID (M)	66	24.215			22.174		25.848	22.136	23.318					24.425			23.06	25.233		25.654			23.641	25.258	26.847	22.484	25.248					22.273			24.701			25.016	29.038		22.323	26.068	26.684	22.454	24.616			25.79
EML-Sca1 MID (M)	67	24.212			23.111			25.336	25.629			27.429		25.419		25.066	23.584			24.355			23.629				23.604					23.734				25.17		25.105			23.658			22.467	23.189			28.272
EML-Sca1 MID (M)	68		28.687		25.334	25.525		25.434						25.302							28.899		24.231	25.755		23.376	25.019					25.372			25.64				28.439		25.155	24.586		25.511	24.417
EML-Sca1 MID (M)	69	25.726		24.622	21.565	23.39		21.649	22.31			26.23		21.738			22.392			24.308	29.207	25.665	21.801	23.569	26.879	22.082	21.775					21.477		24.756	22.625	25.125		23.858		23.896	21.6	23.074		22.156	21.886
EML-Sca1 MID (M)	70		28.761		23.026	25.414		23.944	23.272					22.976		23.905	24.547			24.772			22.665			24.346	21.616					22.789			23.505				29.789		22.414	25.356		23.74	22.236
EML-Sca1 MID (M)	71	24.947			22.037	24.928		22.695	22.148					21.354		23.375	21.747		27.281	23.726	28.975		21.334	24.398		22.077	21.677	26.933				21.81		26.117	22.445		27.376	24.503	28.846		23.003	24.633		22.109	21.91	27.07		27.32
EML-Sca1 MID (M)	72	24.957	27.744		20.965	24.521		22.211	21.4			27.743		22.052		25.176	21.199			25.832	28.591		22.249		26.728	22.718	21.265			27.027		22.123		25.235	21.466	24.53		25.81	28.258		21.582	23.837	26.586	22.321	21.615			26.184
EML-Sca1 MID (M)	73	23.953	28.002		20.103	24.66		25.207	20.683	27.521				21.365		23.966	19.221	24.654	25.845	24.776	27.766	26.346	21.329	24.367		22.594	21.774					21.544			19.368	25.881	27.488	23.031	26.225		20.408	23.465		23.834	21.635	26.169
EML-Sca1 MID (M)	74	23.652			24.015	24.353		23.821	21.314					24.079			22.033		27.608				21.579			23.341	22.509					22.743			21.998		26.51	26.917	34.191		22.534	23.487		23.065	23.44
EML-Sca1 MID (M)	75		33.408		21.7	24.545	26.24	23.642	21.492	29.912				22.763			21.083		26.245	25.704	32.73		24.086				22.023				26.022	21.672		30.515	20.862		27.295		29.642		22.01			22.43	21.479	29.018
EML-Sca1 MID (M)	76	25.668	30.473		21.767			22.789	22.842				26.142	22.542		27.93	20.948			24.288	27.891		22.615	23.113		23.17	21.618					22.164		28.869	20.991		30.943		28.295		22.275			24.862	21.443				26.164
EML-Sca1 MID (M)	77	25.017	27.809		22.62			23.128	22.89	25.78				24.676		24.537	22.416		27.198		27.342		24.036	25.254			22.958	27.455				24.181		27.425	21.818		28.221	24.141			23.478	24.295		23.945	23.409
EML-Sca1 MID (M)	78	25.45	28.277		23.894			23.786	23.788					22.707		23.522	22.733		26.954	25.569	27.908		22.771	25.017		23.285	23.714					22.66			21.81	28.934	26.936		26.104		23.86	25.03		24.142	23.479
EML-Sca1 MID (M)	79		28.253		23.599	25.434		25.731	23.401					23.885		23.99	22.815		28.146	25.48	26.861		22.964			23.735	23.62					23.298			24.474		27.111		26.565		25.831			23.353	23.153
EML-Sca1 MID (M)	80		28.393		24.387			23.48	22.86					23.77			21.758		27.438	25.475	28.445		25.852	24.241		25.136	23.155					23.52		26.933	22.73		28.276	26.359	28.443		23.798	24.88		23.679	22.766
EML-Sca1 MID (M)	81	25.574	33.277		23.82			23.294	26.374					24.996			23.223			25.534			23.472	24.53		24.07	22.861					22.087			22.53	24.564	26.779		33.125		23.847	25.097		24.756	22.667
EML-Sca1 MID (M)	82	25.172	25.957		22.703	24.722		23.596						24.863		25.628	21.362				28.175		21.256			23.773						24.327		23.279	22.491		27.706	25.582			22.417	25.063		24.273	22.636
EML-Sca1 MID (M)	83		28.81		23.422	23.872		24.803	24.165					23.325		28.54	22.196		27.987		28.897		23.711			24.437						23.378		28.053	22.012		27.904	25.66	29.184		24.969			25.382	23.372	28.701			26.926
EML-Sca1 MID (M)	84	25.764	30.257					24.732	22.734					23.483			21.928		27.185	25.345	27.059		23.69			24.826	22.634					23.036			23.179				27.831		24.465	25.112		24.871	23.248
EML-Sca1 MID (M)	85	25.607	27.072		23.704	24.803		23.647	23.074					23.552		23.952	21.727		27.245		26.767		22.598	25.118		24.26	23.597				26.186	23.491		25.764	22.301	25.79			29.353		23.212			24.369	22.214
EML-Sca1 MID (M)	86		26.579		24.627	24.274		24.088	22.327					23.058			22.106		26.293		28.035		23.753	24.88		22.63	23.007				25.894	22.484		25.688	22.607	25.993			33.423		22.787	23.936		24.857	22.23
EML-Sca1 MID (M)	87	25.825	26.3		23.284				24.61					25.256		24.525	23.126	25.802		25.904	25.806		24.449	23.845		26.152	24.294					22.872		24.99	23.145				26.642		22.789	25.359		25.145	23.755
EML-Sca1 MID (M)	88		24.761		23.051	25.267		23.444	22.871					23.349			21.896		26.65				22.79	25.313			21.575				26.339	22.932			22.91		27.082	25.906	28.359		24.878			23.344	23.018
EML-Sca1 MID (M)	89		27.808		25.414	25.312		24.924	23.652					22.911		25.09	22.865	25.595			29.529		22.783	25.279		24.461	22.343					23.88			21.916		26.317	25.848	27.318		24.319	24.834		24.832	23.601	27.859
EML-Sca1 MID (M)	90		27.504		22.608				22.868	27.521			26.324	24.268		25.248	24.649	27.228	32.635		26.545		24.423			23.375	22.901					24.924			23.339		27.122		26.137		22.944	25.167		24.18	22.042
EML-Sca1 MID (M)	91					23.599	27.406		24.137	24.087					27.076		23.629	23.253	27.559			26.821		23.501	26.995		23.057	24.26					25.659		24.393	22.618			28.178	24.413		22.872			25.416				27.16
EML-Sca1 MID (M)	92		27.375	26.094	26.558			23.892	23.929					23.784			23.551		26.828	26.1	26.213		23.849	23.971		24.102	22.201					22.529			21.711			25.59	26.01		21.398			24.158	22.255				26.511
EML-Sca1 MID (M)	93	26.383	26.188		21.961			23.222						23.192			21.775			25.384	26.576		22.195			23.487	21.501				25.728	22.929			23.963		28.236		27.612		24.245	23.53		24.001	25.183
EML-Sca1 MID (M)	94		27.415		23.71			24.211	25.039	27.351				24.345			22.204		28.096		27.403		23.549			25.825	25.114	27.597			27.058	24.359		25.399	23.754	26.209	27.135	25.91	26.29		22.945			25.106
EML-Sca1 MID (M)	95	25.823	27.647	25.937	21.667			22.804	22.5				26.278	22.933			20.961			25.14	28.457		21.844			22.277	22.059					30.075			21.088			25.904	27.321		24.884		26.649	24.828	22.222
EML-Sca1 MID (M)	96	24.721	27.787		24.113			23.637	24.441					22.826			21.655	25.08		25.696	27.146		24.583	24.851		22.808	23.303					24.362			21.539	25.297	27.917	25.783	27.06		24.3	23.789		23.579	23.39
EML-Sca1 MID (M)	97	25.659	28.798		21.844	25.201		22.537	21.486					22.129		24.087	19.87		28.265	25.798	27.707		22.589	24.606		24.316	21.097					22.479			20.49		27.373	23.815	27.953		22.127	23.731		22.564	21.159				26.491
EML-Sca1 MID (M)	98	22.044			21.852	23.225		21.885	22.688			25.952		20.625		24.577	20.442	24.252		22.42			20.833	24.28		21.615	22.474			26.444		20.44		21.075	20.051	25.433		22.372	27.458		20.874	22.021		20.173	20.543			25.875
EML-Sca1 MID (M)	99	24.142	25.975		22.775	24.755		23.598						24.852		25.628	21.342				28.112		21.285			23.753						24.357		23.289	22.451			24.572			22.457	25.053		24.253	22.646
EML-Sca1 MID (M)	100	25.354	26.181		21.91			23.288						23.155			21.741			24.34	26.575		22.198			23.442	21.517				25.775	22.989			23.953				27.642		24.285	23.453		24.051	25.243
EML-Sca1 HIGH (H)	101	22.074	25.003		19.904	21.814		22.647	20.849			26.877	26.106	21.35		24.205	20.937	23.272	26.508	22.72	26.05		20.955	24.193		22.665	20.98			27.326		21.483		24.131	20.884			22.957	26.012		20.714			23.735	21.228	27.008		27.506
EML-Sca1 HIGH (H)	102	24.063	26.178		22.502	24.016		22.788	22.23					21.663		24.428	21.431			25.619	25.54		21.735	22.911		22.708	21.835				26.185	22.136		22.927	20.565	27.87	27.359	25.586	25.909		22.764	24.216		23.939	21.737
EML-Sca1 HIGH (H)	103	22.278	25.264		20.587	22.736		21.55	19.935			26.036		20.974		22.507	20.357	26.511		22.74	26.715		20.651	22.543		20.921	20.821			25.499		20.872		24.803	20.452	24.439	26.663	22.622	25.068		19.921	23.321	25.985	21.759	20.561			25.915
EML-Sca1 HIGH (H)	104	23.032	24.71		21.334	25.01		21.599	21.157					21.695		23.734	20.514			22.914	25.955		20.307	23.785	26.526	22.498	22.001					21.568			20.887		27.133	23.725	25.664		20.989	22.569		23.056	20.397	25.752			27.252
EML-Sca1 HIGH (H)	105	22.189			20.645			21.895			29.065			21.307		22.336	19.827		28.542	23.84	27.059		19.86	24.661		21.254	21.911					21.839		22.551	19.532	30.167		23.666	27.355		20.703	24.929		21.43	21.488			27.366	26.388
EML-Sca1 HIGH (H)	106		25.136		22.083	22.756		21.051						22.017		22.421	21.09		26.241	24.472	27.17		21.482	22.39		23.953	21.211					22.416		23.48	22.222	29.34	27.956	24.887	26.11		23.216	22.619	25.248	23.934	23.469
EML-Sca1 HIGH (H)	107		27.4	25.248	21.543	24.188	26.426	21.759	20.894					21.6		22.689	20.058			23.327	26.822		21.504	23.126		21.811	21.657			26.546		20.928		23.097	20.01	24.618	27.319	22.44	26.387	25.915	21.756	24.013		23.807	21.492			25.806
EML-Sca1 HIGH (H)	108	24.887	28.535		20.907	24.205		23.026	20.095			26.41		20.969		23.186	20.569		27.425	25.732	26.939		20.809	25.418		23.391	20.806			27.607		21.246		24.723	22.365	24.899	27.649	24.214	26.764		20.995	23.619		24.484	19.9	26.862		25.546	26.387
EML-Sca1 HIGH (H)	109	23.062	26.614		20.423	22.659		21.413	21.011					21.527		23.115	20.44		28.052	23.55	25.972		21.066	22.454		21.673	21.505					21.557		24.131	21.13	25.767	27.389	22.437	25.204		20.633	22.709		23.06	20.935			27.552
EML-Sca1 HIGH (H)	110		25.871		22.941			23.142	21.865	25.809				21.649			21.554				25.867		21.613	24.538			22.876					23.165		23.124	22.055		27.199	25.757	25.779		21.507	24.03	26.525	23.991	22.02
EML-Sca1 HIGH (H)	111	24.506	24.961		22.326	24.34		22.417	21.104					21.798		23.419	22.168			24.362	25.645		22.308	24.047		23.044	21.46					22.064		24.014	22.161	29.579	27.205	24.703	25.331		22.523	24.285		22.948	20.943
EML-Sca1 HIGH (H)	112	22.944	24.912		21.215	22.57		21.833	20.909			25.45		20.802		23.537	20.153	24.597	26.534	22.574	25.023		20.545	22.964		21.729	21.146			26.009		20.927		23.669	20.114	24.995	25.294	23.512	27.217		20.736	24.592		22.772	20.988			25.353
EML-Sca1 HIGH (H)	113	22.523	25.649	27.312	20.833	25.275		20.312	20.028	26.074		27.402		21.279		23.702	18.817	24.919	27.171	22.716	25.655		20.704	23.673		20.63	19.638			27.471		20.904		24.715	18.463		26.803	23.671	26.029		20.609	24.576		20.988	20.616	27.043		26.956
EML-Sca1 HIGH (H)	114	22.279	25.376	24.836	20.366	24.525		23.977	20.182					20.36		23.859	22.298		25.552	22.389	25.918		20.456	23.276		22.653	20.646					21.08		22.204	20.727	24.401	26.309	22.579	27.025	25.365	19.804	22.988		22.452	20.401
EML-Sca1 HIGH (H)	115	24.287	25.743		21.715	24.086		23.68	20.933					21.529			20.872	25.35	28.447	23.588	26.369		22.002	23.69		22.138	21.934			27.125		22.592			21.638	25.293		25.17	25.97		21.81	24.446		23.231	21.764			26.527
EML-Sca1 HIGH (H)	116	23.325	26.726		21.893	23.531		22.13	21.729					21.126		24.02	20.572		27.215	22.65	26.31		20.771	24.021		22.473	22.309					21.326		23.716	20.246	25.235	27.333	22.648	25.68		20.524	23.271	26.66	23.038	21.951				26.338
EML-Sca1 HIGH (H)	117	23.065	28.97		21.835	25.87	33.545	22.465	20.242					21.179		21.775	21.034	25.406	25.922	23.052	27.359		20.672	23.273		21.821	21.843	26.792			24.468	21.278	26.481	22.302	20.966		26.268	22.087	24.658		20.199	23.55		22.201	22.763				26.356
EML-Sca1 HIGH (H)	118	23.708	26.038		21.205	24.852		23.062	21.406					22.965			20.933		26.245	24.048	26.442		21.726		27.148	22.505	21.168			27.536		23.387		22.612	21.229			24.091	25.8		21.578	21.754	26.08	19.871	20.828
EML-Sca1 HIGH (H)	119	22.721	25.691		21.963	24.597		24.36	21.455	27.628		27.13		21.275			21.202			24.668	24.942		21.167	24.3		23.176	24.117			27.959		21.383		24.695	21.207		26.22	25.082	26.881		21.852	25.481		22.508	21.415				26.598
EML-Sca1 HIGH (H)	120	25.923	27.703		21.433	25.357	26.76	22.196	22.919				25.68	21.756	26.431	23.696	20.691		25.864	23.501	26.164		21.232	24.189		22.104	22.503					23.268		23.64	20.329		26.352	25.883	26.317		21.128			22.102	22.096			27.414
EML-Sca1 HIGH (H)	121	25.499	27.546		22.289	25.244		24.23	21.764					23.759		25.109	22.738	25.926		25.503	28.897		22.381	25.286		23.825	22.708					24.62			22.493	26.864	27.076	23.935	29.973		23.86	23.668			23.292
EML-Sca1 HIGH (H)	122	25.419	32.246		23.197	24.922		22.819	21.793					23.309		26.427	22.477				31.725		23.718			25.263	24.402					23.887			21.383			24.927	31.201		25.635			24.537	22.757
EML-Sca1 HIGH (H)	123		26.256		20.98	24.855		22.803	21.723					21.116		23.917	21.846			25.226	26.077		21.53				20.058					21.649			20.434	24.733		23.92	25.272		21.411			20.736	21.447
EML-Sca1 HIGH (H)	124	26.177	26.586		22.78	25.06		24.774	22.924				27.038	22.976		23.869	22.729			26.111	26.928		22.335	25.19			21.89					21.955		24.702	20.85				26.601		24.691			22.488	22.502
EML-Sca1 HIGH (H)	125		26.135		24.485	25.307		24.818	23.665					24.672			23.02	25.174		26.232	28.119		23.789			22.913	23.083					24.279		23.697	22.256		26.753		27.688		22.646	25.207		23.774	22.951
EML-Sca1 HIGH (H)	126	24.587	27.529		20.846	21.417	26.136	21.737	21.306	23.896		28.335	24.121	23.434		26.347	21.415		26.306	24.654	27.992		20.089	21.568	26.142	21.697	21.295	23.222	28.661		24.468	23.707		26.114	21.565		26.314	25.052	27.715		20.138	21.816	25.982	23.451	21.857	23.808	28.395	28.843	24.563
EML-Sca1 HIGH (H)	127	26.126	28.171	29.578	24.44		26.304	23.646	23.81					23.499	28.829	26.091	23.933		25.482		27.745	29.814	24.305		26.446	23.385	23.432		26.658		29.963	23.999	29.001	26.524	23.806		25.659	26.316	27.566	29.906	24.137			21.536	23.563		26.688		29.533
EML-Sca1 HIGH (H)	128	24.166	27.634	31.49	24.137	25.452		23.492	20.924			29.26	26.827	25.717			22.684	27.616	31.901	24.405		31.053	24.3	25.87		23.041	20.411	28.178		29.417	26.899	25.093		28.126	22.177	26.011	31.183	24.62	27.59	31.261	24.467	25.556		23.381	20.289	27.83		29.565
EML-Sca1 HIGH (H)	129		26.211		22.437	24.837		23.61	22.201					23.077			21.34			23.726	25.27		23.778				20.451					23.805		23.285	20.256	25.171		24.548			23.127				20.117
EML-Sca1 HIGH (H)	130	24.482	26.668		22.965	25.434		24.613	21.004					23.407			19.58		26.178	25.576	26.693		24.438	25.979		25.009	26.882					21.243	27.575	24.08	22.005	25.501	28.072		26.301		21.958		28.006	23.893					26.924
EML-Sca1 HIGH (H)	131	23.789	24.929		21.515	22.929		24.158	21.993					23.764			21.65		19.063	23.841	25.882		21.075	26.046			22.829					24.941			19.916	29.805	24.794	23.024	26.457		22.325		25.105	22.308	20.126
EML-Sca1 HIGH (H)	132		27.693		22.811			25.114	21.765					24.944		23.099	22.663						22.824								26.291	24.073			20.849			23.497	27.889		23.364	24.994		25.842	20.739
EML-Sca1 HIGH (H)	133	25.725	27.567		22.662	24.367		21.16	21.322					22.537			18.73	25.061	27.132	25.774	27.088		22.377	27.756		21.303	21.156				26.583	22.973		25.873	19.322				28.158		21.604	25.325		21.286	22.606
EML-Sca1 HIGH (H)	134	25.402			24.096			25.102	22.931					23.058			21.861		27.34	25.477			23.235	25.162		24.896	22.541					22.768			21.845			26.485			22.673	24.189		24.028	22.757
EML-Sca1 HIGH (H)	135	23.886	28.179		22.671	24.768		23.725	23.215					23.495		24.848	21.908				26.494		24.434			22.185					24.868	21.458			21.029		25.58				22.027
EML-Sca1 HIGH (H)	136	25.947	27.6		26.424				23.152				26.612	24.94			23.874		28.028		27.258		26.283			25.391	22.986					26.029			22.077	25.553	28.288				23.555			23.601	23.018
EML-Sca1 HIGH (H)	137	24.68	27.766	25.072	22.853									26.899			20.417	25.685		24.986	27.753		23.521				23.391			25.231					20.357	25.142		24.28		25.92	23.063				23.563			25.483
EML-Sca1 HIGH (H)	138	23.857			22.761			21.464	22.621								23.299			23.548			22.383			21.38	22.142								23.628			23.313			22.247		26.055	21.662	22.365				28.867
EML-Sca1 HIGH (H)	139	25.125	25.649		20.289	23.978		24.299	22.853				27.008	22.356	24.358	25.994	25.092			25.875		26.478	20.412	23.665		24.673	22.356					22.968		25.876	24.563			25.782	25.513	26.345	20.522	23.754		24.604	22.542				27.582
EML-Sca1 HIGH (H)	140	24.298	29.127		21.664	25.348	25.424	21.575	23.131	26.989			27.524	22.85		24.597	23.186	27.586	25.956	24.672	29.048	31.237	21.171	25.289	25.043	21.299	23.158				27.895	22.804		24.241	23.265	26.073	26.119	24.823	28.533	31.556	21.655	25.968	25.336	21.36	23.118	26.59			27.822
EML-Sca1 HIGH (H)	141		27.281	29.19	21.674			22.651					26.065	22.804		22.927	20.073	25.587	27.2	23.558	27.723		22.48			22.939	24.258			25.693	26.026	22.519		23.226	27.302		25.152	24.596	27.727	29.818	22.109	25.669	29.929	23.506	24.568
EML-Sca1 HIGH (H)	142		26.258		20.845			22.329	24.564					23.963		22.603	20.372				25.787		21.983							28.134	26.418	23.428			21.77	26.212	24.709	24.291	24.605		21.427	24.238	23.922	21.922	22.148			25.409
EML-Sca1 HIGH (H)	143		26.491		22.766	24.92		23.247	22.13					23.717		24.573	20.117		27.357	25.686	27.268		23.206			25.244	22.487					23.379			21.674	25.935			25.397		22.418	25.452			24.923
EML-Sca1 HIGH (H)	144				22.342			24.13	23.681					22.524		25.047	22.4		26.322	25.877	26.247		23.521			23.89	23.803					22.626			22.538			27.452	27.331		23.446			24.847	23.085
EML-Sca1 HIGH (H)	145	22.954	24.862		21.242	22.67		21.853	20.919			25.478		20.848		23.542	20.142	24.585	26.511	22.571	25.043		20.544	22.944		21.759	21.142			26.042		20.954		23.668	20.144	24.915	25.224	22.572	27.218		20.735	24.591		22.742	20.978			25.384
EML-Sca1 HIGH (H)	146	23.073	26.148		22.503	24.066		22.758	22.223					21.653		24.442	21.452			24.611	25.545		21.744	22.941		22.778	21.875				26.184	22.156		22.924	20.575	27.817	27.349	24.586	25.952		22.742	24.241		23.959	21.757
EML-Sca1 HIGH (H)	147	22.914	24.922		21.216	22.56		21.853	20.929			25.845		20.85		23.551	20.184	24.541	26.544	22.542	25.055		20.575	22.974		21.49	21.176			26.051		20.975		23.679	20.124	24.915	25.244	22.592	27.275		20.752	24.574		22.742	20.978			25.393
EML-Sca1 HIGH (H)	148	25.187	26.576		22.75	25.66		24.754	22.934				27.0158	22.926		23.845	22.741			25.114	26.944		22.345	25.741			21.819					21.965		24.742	20.425				26.685		24.651			22.458	22.504
EML-Sca1 HIGH (H)	149		26.441		22.786	24.82		23.257	22.123					23.727		24.577	20.111		27.341	24.61	27.248		23.224			25.244	22.447					23.375			21.674	25.915			25.347		22.488	25.458			24.975
EML-Sca1 HIGH (H)	150	23.176	30.684	31.59	24.167	29.455		23.452	20.945			29.526	26.247	25.72			22.641	25.611	26.912	23.415	31.563	31.083	24.563	28.857		23.044	20.451	27.155		29.415		25.085		23.156	22.187	26.021	26.173	23.963	30.749		24.487			24.351	20.285	27.823			26.788
[truncated: 25 more columns]

## Sheet: EPO treated (d1,d3,d6)
		There are 3 tech replicates/assay for each sample
		Technical Replicate 1																		Technical Replicate 2																		Technical Replicate 3
		Pu.1	Hba-a1	Egr2	ckit	TBP	CD11b	Runx1	Scl	EpoR	CEBPa	Gfi1	Eklf	cMyb	cJun	Fog1	Gata2	Fli1	Gata1	Pu.1	Hba-a1	Egr2	ckit	TBP	CD11b	Runx1	Scl	EpoR	CEBPa	Gfi1	Eklf	cMyb	cJun	Fog1	Gata2	Fli1	Gata1	sfpi1	Hba-a1	Egr2	ckit	TBP	CD11b	Runx1	Scl	EpoR	CEBPa	Gfi1	Eklf
d1-EPO- Sca1 LOW (L)	1	25.744	25.411	26.514	24.748			23.614	23.218					26.357	28.55		22.853		25.205		25.111	26.504	22.686	25.308		23.698	23.142					23.644	28.123		21.621		24.286	26.031	25.379		25.153	25.258			23.644
d1-EPO- Sca1 LOW (L)	2	25.06	25.232		23.749			25.843	23.327					25.264			20.853	27.376	24.176		25.48		23.648	25.478		25.072	23.252					23.486		23.929	21.633	28.437		25.114	25.184		25.2	25.446			22.815
d1-EPO- Sca1 LOW (L)	3		26.414		24.287	24.224		25.007	22.947					23.726			22.089	27.301	25.34		27.246		25.188	25.47		25.138	22.892					23.379		23.885	21.854				26.474		23.267	25.497		25.693	22.449
d1-EPO- Sca1 LOW (L)	4	26.741	26.629		22.986			24.061	22.418	27.007				23.324			21.637	28.413	26.3	26.84	26.964		23.231	25.588		24.912	22.159					25.298		24.935	22.172		26.677		26.88		22.933			26.674	23.453	27.185
d1-EPO- Sca1 LOW (L)	5		26.31		24.736	25.241		23.758	23.474					23.031			22.18				27.255		22.268	25.453		24.383	23.238					24.422		26.256	23.007				26.641		23.644				24.552
d1-EPO- Sca1 LOW (L)	6	25.321	26.309		23.586				22.671					23.807			22.698			25.651	25.692		22.896			24.006	24.484				26.098	23.39			22.536	28.397			26.224		24.836			23.375	24.711				26.141
d1-EPO- Sca1 LOW (L)	7		25.375		23.67	25.321		23.766	22.692				26.767	24.357		25.321	22.442		25.312	26.11	25.416		23.687	25.069		24.271	23.311	26.914			26.521	22.842			21.411		25.429	25.091	25.825		24.298			24.434	22.515	26.882
d1-EPO- Sca1 LOW (L)	8				22.48	25.194		23.377	23.252					23.782			21.726		25.437	25.478	26.783		24.217	25.461		23.794	22.922					25.53			21.105		24.945	25.877	26.743		24.283	25.644		23.829	22.666
d1-EPO- Sca1 LOW (L)	9	25.726			23.151	26.585		24.318	22.819				26.536	23.225		24.987	21.356	27.431			26.868		23.699			25.369	22.516				26.481	22.494		25.106	23.567		25.583	25.84	26.221			26.562			23.268
d1-EPO- Sca1 LOW (L)	10		27.933		24.919			24.625	22.045					24.198		23.495	25.214		25.134		27.459		23.357	23.472		23.588	23.531					22.504		25.749	21.878		24.819		27.583		24.377			23.148	21.67
d1-EPO- Sca1 LOW (L)	11		26.627		23.231	24.793		24.779	22.055					25.481		24.932	21.404			26.271	26.754		23.264	25.216		24.972	22.227					23.226			22.848				26.121		22.666	24.801		25.677	23.556
d1-EPO- Sca1 LOW (L)	12		25.031		24.281	25.613		23.173	22.357					22.481		23.927	20.18		25.415	26.835	26.424		23.395	25.377		23.03	23.784					22.784			21.092			26.246	25.275		23.011	25.886		23.308	23.937
d1-EPO- Sca1 LOW (L)	13		27.693		22.563			23.899	23.55					25.428		24.91	22.921			26.676	25.272		25.144	25.663		24.361	22.95					23.617		25.033	21.846		25.434	25.28	26.956		23.124			25.041	25.287
d1-EPO- Sca1 LOW (L)	14	25.622	26.409		23.051			24.284	23.422					22.573			21.893				26.958		23.138	26.337		24.311	22.499					24.426		26.012	21.531	27.64	25.64		24.473		25.101	25.391		24.376	25.24
d1-EPO- Sca1 LOW (L)	15	24.818	25.092		22.392	25.391		23.51	23.152				26.425	22.548		23.938	22.323		25.479	25.952	25.501		23.113	25.377		23.743	22.766				26.525	23.602			21.753			26.773	25.708		24.045			24.992	23.294
d1-EPO- Sca1 LOW (L)	16		28.037		25.199	25.446			23.192					23.354		26.376	22.623			25.912	27.673		23.783			25.196	22.899				26.618	23.728			22.492		25.393		27.787		23.586			23.521	24.307				26.398
d1-EPO- Sca1 LOW (L)	17		25.956		23.739	25.471		23.338	23.207					25.526	27.562		23.572		25.294		25.675		24.4	25.635		24.359	22.609				26.859	24.766	27.456		22.477				27.437		24.04			25.485	23.041				26.569
d1-EPO- Sca1 LOW (L)	18		26.402		23.324	24.297			22.305					25.128			23.139	27.17	25.217	26.568	27.485		21.77	25.09		23.34	24.138				26.634	24.669		23.883	22.472			25.832	27.444	26.449	24.798	24.529		25.765	23.74				26.174
d1-EPO- Sca1 LOW (L)	19		26.441		23.43	25.666		24.898	22.422					25.411		24.951	22.514			25.723	26.27		26.078				22.885				26.669	24.373		24.202	21.743	27.334	24.52	26.832	26.752		23.236	25.644		26.237	23.5				26.539
d1-EPO- Sca1 LOW (L)	20		24.872		23.997			24.647	23.171					23.597			21.296	27.462	27.239	25.887	24.999		23.339	24.279		25.125	22.046					24.361			22.755				25.914		23.806	25.268		25.471	22.523
d1-EPO- Sca1 LOW (L)	21	23.902	25.818		23.767			22.584	22.139					24.593			23.426		24.025		26.05		23.776				22.418					23.223		24.263	21.324			24.457	27.253		22.949	25.981		22.729	22.688
d1-EPO- Sca1 LOW (L)	22	26.255	25.542		25.292			23.51	23.296					23.867			22.855		25.816		25.673		25.198			24.085	26.467					23.265		25.021	22.353			25.8	25.507		22.199	25.923		25.304	23.849
d1-EPO- Sca1 LOW (L)	23	24.902	25.956		25.231	25.369		24.141	23.236					25.383			22.641		25.453	24.887	26.831		22.876	24.369		24.208	23.196					23.572		24.908	20.89		26.581	24.83	26.23		23.789	25.35		24.651	23.826
d1-EPO- Sca1 LOW (L)	24	25.817	26.934		24.207			25.156	22.203					23.034		22.975	22.522		25.378	25.311	26.341		22.831			25.215	22.534					23.294			23.539	27.702			25.854		23.693			25.081	22.421
d1-EPO- Sca1 LOW (L)	25		29.359		25.425			25.309	23.755				25.058	24.639			23.304		27.244		26.964		25.344			25.392	23.378				25.029	24.89			23.041		27.278		27.867		25.645			26.023	23.861				25.515
d1-EPO- Sca1 LOW (L)	26	28.858	25.034		24.93	27.813		27.092	23.556					25.202			22.147		27.144	27.305	25.827		25.049	26.668		26.484	23.38					24.783		27.791	22.192		26.867	27.241	25.205		25.648	28.234		28.988	23.61
d1-EPO- Sca1 LOW (L)	27				24.713	28.423		24.299	22.27					23.394		28.865	21.681	28.989	26.215	28.461			24.6	27.928		24.125	22.34				26.235	23.506		27.464	21.615	28.99	26.174	27.043			24.84	27.228		24.681	22.29				26.289
d1-EPO- Sca1 LOW (L)	28	25.2	24.78		23.919	25.796			21.601				24.404	23.042		23.837	22.168		23.245	24.635	24.666		24.033	26.072			21.547				24.298	23.123		23.52	22.03	29.001	23.418	25.341	24.646		23.913	24.879			21.752				24.63
d1-EPO- Sca1 LOW (L)	29				26.785			26.378	24.129					24.638		27.35	23.66		26.358	26.738			27.105	29.35		27.236	24.554					24.876		28.111	24.305		26.578	28.065			26.336	28.317		26.688	24.462
d1-EPO- Sca1 LOW (L)	30	26.24	26.813		24.922	25.173		25.479	23.2				25.565	24.714		27.043	23.591		24.712	29.159	26.188		24.726	25.057		25.808	23.494				25.919	24.39		27.901	23.91		24.94	26.539	26.377		24.788	25.26		25.75	23.628				25.713
d1-EPO- Sca1 LOW (L)	31	26.785	24.24		24.915			25.066	23.441					24.019		25.522	22.673	30.157	25.194	27.368	23.975		25.742			24.839	23.432					23.648		25.6	23.573		25.25		23.564		25.169			25.408	23.541
d1-EPO- Sca1 LOW (L)	32		21.292		24.938	27.728		25.832	23.878				26.341	25.421		24.052	23.137		24.557		21.495		25.441	27.939		26.002	23.792				26.767	25.144		24.271	23.03		24.584		21.472		26.326	27.646		26.061	24.019				26.225
d1-EPO- Sca1 LOW (L)	33	26.608	25.074		26.537			26.942	23.766				27.505	25.359		26.294	26.119		26.023	27.386	25.185		26.636			27.257	24.2	29.006			27.46	26.71		28.278	25.409		27.039	26.715	26.051		27.18			27.852	24.12	28.821
d1-EPO- Sca1 LOW (L)	34	26.374			24.754			26.412	23.421					24.812		27.359	21.452	29.016	26.408	25.795			24.738			26.352	23.565					24.355		27.3	21.718	28.928	25.98	26.335			25.162			27.048	23.379
d1-EPO- Sca1 LOW (L)	35	24.121			23.597	26.143		23.639	22.044			28.992		23.081	28.521	27.811	20.033	27.276	28.13	24.498			23.951	25.972		23.772	22.562			27.842		23.41		27.774	19.961	27.813	28.442	23.879	28.544		24.498	27.168		24.075	22.971			27.781
d1-EPO- Sca1 LOW (L)	36		28.873		28.647	26.845			22.372				27.318	25.323	27.007	28.36	22.693		25.098		29.347		28.111	27.011			21.743				27.2	24.836	27.39		22.657		24.951		28.448		28.629				22.11				26.769
d1-EPO- Sca1 LOW (L)	37	26.996	26.058		23.947	27.147		24.049	22.977				26.561	23.226		28.324	22.027		26.043	26.159	26.173		24.049	26.943		24.107	23.455				26.57	22.911		26.827	22.304		25.261	26.504	25.898		24.391	27.107		23.856	23.382				26.128
d1-EPO- Sca1 LOW (L)	38		26.82		24.04	25.744		27.141	23.507				25.251	23.566			22.434		26.49		25.925		24.139	25.348		26.344	23.434				25.719	23.492			22.139		27.371		25.918		23.836	25.947		26.57	23.756				24.87
d1-EPO- Sca1 LOW (L)	39	26.119	26.391		23.816			24.613	21.538					23.463	26.496	24.185	21.037	26.31	24.766	26.542	27.005		23.484			24.343	21.533					23.052		24.341	20.61	27.739	24.676	25.539	26.248		23.738			25.314	21.645
d1-EPO- Sca1 LOW (L)	40	26.591		25.171	26.882			26.559	22.469	28.758			26.408	23.543		25.779	21.001		24.136	27.832	28.953	24.753	25.357			26.182	22.644	29.368			26.372	23.635		25.291	21.277		24.871	26.59	28.271	24.92	25.528			27.061	22.79	28.015			25.913
d1-EPO- Sca1 LOW (L)	41		21.229		25.138	26.234		27.014	22.482				24.841	24.475		25.44	24.273		24.033		21.203		25.837	26.94		28.193	22.461				24.763	24.372		25.263	24.64		23.448		21.35		24.859	27.96		26.519	22.407				24.953
d1-EPO- Sca1 LOW (L)	42	26.162	24.487		23.269	24.297		23.063	23.2	27.027			26.358	22.996		24.938	20.28	28.897	25.493	25.673	24.54		23.365	24.868		22.915	22.795	27.863			26.285	23.202		24.882	20.28		24.969	25.96	24.12		23.482	24.527		23.153	22.887	27.416			25.852
d1-EPO- Sca1 LOW (L)	43	27.736	22.352			27.011		24.57	22.904				26.261	25.022		23.913	25.943		25.681	27.254	22.58			26.338		25.775	22.704				27.271	24.583		24.054	25.833		25.403	27.824	22.524			26.572		25.071	22.515				27.289
d1-EPO- Sca1 LOW (L)	44	27.214	21.343		23.067	25.203		23.161	21.606	27.904			24.283	23.129		23.047	22.084		22.809	26.575	21.901		23.455	25.166		23.513	21.772				23.923	23.709		23.213	21.831	27.578	22.609	27.897	21.463		23.472	25.27		23.165	21.631	27.272			24.381
d1-EPO- Sca1 LOW (L)	45	23.885			22.41	25.472		22.029	21.024				25.124	22.827		23.949	19.434	28.32	23.237	23.779			22.477	25.156		22.011	21.252				24.701	22.877		24.178	19.385		23.011	23.992			22.617	24.362		22.029	21.114				25.027
d1-EPO- Sca1 LOW (L)	46	25.076	21.859		22.929	24.768		24.034	22.497				24.873	23.026		24.036	21.984	28.649	23.164	24.558	21.911		22.837	24.786		23.328	22.878				24.809	23.197		24.28	21.973	29.002	23.32	24.804	21.855		23.301	25.695		22.914	22.778				24.202
d1-EPO- Sca1 LOW (L)	47	25.043	17.993		23.841	26.097		23.183	21.357				23.373	22.046	25.775	24.13	21.105		24.201	25.103	17.931		24.358	26.556		23.077	21.543	28.7			23.821	21.846	25.972	24.168	20.901		24.112	24.643	18.039		23.669	27.261		24.006	21.567	28.561			23.492
d1-EPO- Sca1 LOW (L)	48				21.787	24.16		23.545	21.675				26.383	22.049	27.797	23.846	19.165		22.609	23.546			21.943	24.267			20.779				25.576	22.297	28.42		18.974	26.873	23.228	23.979			22.187			22.039	20.859				26.181
d1-EPO- Sca1 LOW (L)	49	25.741			23.174	26.574		24.311	22.874				26.574	23.285		24.944	21.347	27.474			26.81		23.641			25.317	22.521				26.485	22.474		25.114	23.554		25.574	25.854	26.287			26.565			23.252
d1-EPO- Sca1 LOW (L)	50	26.985	26.021		23.954	27.174		24.01	22.941				26.541	23.241		28.374	22.074		26.025	26.174	26.144		24.011	26.945		24.111	23.441				26.587	22.941		26.841	22.31		25.254	26.554	25.841		24.374	27.108		23.845	23.385				26.137
d1-EPO- Sca1 MID (M)	51		25.849		23.367	24.514		22.972	24.184					23.594			22.168	28.448	25.665				24.127	23.917		24.455	23.681					23.317		26.02	21.882		25.921	24.931	26.705		22.926			24.307	23.863
d1-EPO- Sca1 MID (M)	52	25.73	26.509		22.721			24.278	23.349					23.203		25.078	23.628	26.309		25.748			22.925				23.177					23.536		25.08	22.307				26.285		24.249			25.805	24.82
d1-EPO- Sca1 MID (M)	53		25.814		23.432	25.273		24.897	22.811					24.161			22.447		25.412		28.561		23.225	24.26		24.001	22.834					23.186			21.786	27.796	25.703		26.379		22.367	24.056		23.986	22.739
d1-EPO- Sca1 MID (M)	54	25.33	25.568		23.661			25.173	23.557				26.786	23.049		25.043	24.49			25.838	25.733		24.26	26.276			23.393				26.802	23.385			23.463		25.256	26.766	26.44		24.218	25.48		23.85	23.49
d1-EPO- Sca1 MID (M)	55	25.763	25.01		23.829			24.26	22.701				26.632	23.529		24.208	22.609		24.501	25.835	25.13		24.724			25.391	23.546	26.883			26.472	22.491			23.537	28.518		27.624	25.083		22.676			24.268	23.681	27.029
d1-EPO- Sca1 MID (M)	56		26.673		23.248	24.546		25.45	26.706				27.452	25.314		25.116	21.923	27.27		24.798	26.501		24.753	24.632		24.969	22.617				27.439	22.796			22.075		25.846	25.87	27.886		22.773			24.826	23.199
d1-EPO- Sca1 MID (M)	57	26.46	24.785		23.877			24.187	23.704					23.17			22.371			25.642	25.633		22.859			25.159	24.715					24.27		24.559		27.69			28.723		24.749	23.636		25.838	22.502
d1-EPO- Sca1 MID (M)	58				22.759	24.712			22.252					23.168			22.25		23.93		27.441		23.782	24.216			23.097					24.418		24.247	21.244		25.711		25.497		23.647			24.712
d1-EPO- Sca1 MID (M)	59	24.036	26.482		24.177			24.921	22.684					23.339			22.992			23.517	26.463		23.801				22.257					22.339		22.647	22.363		23.916		28.26			23.21			21.968
d1-EPO- Sca1 MID (M)	60				23.897	25.536		24.335	24.328					24.419		25.226	23.12				25.461		23.616			25.254	23.518				26.652	23.734		24.871	22.886				26.729		23.43				23.41				26.321
d1-EPO- Sca1 MID (M)	61		26.719		23.727	25.377		25.392	22.868					22.518		25.132	23.398		27.247		27.916		23.264	25.94		23.796	24.305				26.563	23.37			22.24			26.061	26.108		23.385	24.355		24.992	23.456				26.785
d1-EPO- Sca1 MID (M)	62	25.628	26.481		23.151			23.789	22.702					23.214			22.865			25.796	26.644		23.636				23.988					22.891			21.912			26.088	26.065		23.441			23.999	22.622
d1-EPO- Sca1 MID (M)	63		28.659		25.151	24.528		23.769	22.772					22.899		25.157	21.76		26.323		26.833		25.501	25.46		25.262	21.918				26.365	23.43		25.263	22.536		25.418		26.349		23.715			23.48	23.266				26.471
d1-EPO- Sca1 MID (M)	64	25.824	26.041		25.098	25.557		24.284	23.446					24.375		25.056	21.427				26.622		23.724	25.691			23.676					26.125			22.561		25.442	25.551	26.964		23.668	25.616		24.064	25.475
d1-EPO- Sca1 MID (M)	65		26.794		23.391	25.515		24.693	24.151					24.819			22.596				26.484		23.331	24.631		23.884	22.714	26.979				23.242			22.029	27.39		27.07	26.076		23.187	24.479		25.453	23.501
d1-EPO- Sca1 MID (M)	66		26.634		24.223			23.996	23.639					23.656		24.981	21.768	27.54			27.67		24.687	26.651		25.261	23.168				26.609	23.148		24.082	22.652	26.387	26.342		25.387		24.231	24.858			23.529				26.855
d1-EPO- Sca1 MID (M)	67		27.165		24.399			23.583	22.987				26.344	24.649		25.396	22.016		24.945		26.036		23.331			25.382	22.93					24.901			22.96		24.585	25.973	26.741		23.28			23.87	23.102				26.454
d1-EPO- Sca1 MID (M)	68		26.721		23.954	24.646			23.881					23.522		24.315	21.86			25.996	25.446		24.061			25.409	23.104					22.827		26.185	22.27				26.552		24.238	25.593		25.239	23.976
d1-EPO- Sca1 MID (M)	69		25.265		23.279			24.216	22.636				26.421	23.803		23.919	22.101			26.126	25.587		23.283	25.673		24.35	24.841				26.587	23.059		24.174	22.403			26.95	26.029		22.786	25.651		25.012	23.304
d1-EPO- Sca1 MID (M)	70	25.036	25.544		24.078	25.561		26.313	24.495					23.25		24.933	22.388			26.602	25.799		23.11	25.213		26.454	24.718					23.591	27.653		21.931		25.423	25.389	25.643		23.818			26.595	24.922
d1-EPO- Sca1 MID (M)	71		26.056					25.189	23.144					23.705		24.905	22.492			25.918	26.125		23.478								26.21	24.835			21.867			25.689	26.263	26.382	23.464			26.319	23.158				26.543
d1-EPO- Sca1 MID (M)	72				22.886			23.364	22.375					22.511			21.948				25.812		22.525				21.97				26.365	25.042			21.805		24.68		25.542		22.786			23.32	22.099				26.175
d1-EPO- Sca1 MID (M)	73					25.147		24.105						23.923		24.653	25.416						24.376	25.281	26.718	25.699	24.285					24.706			24.891				27.287		23.597				23.191
d1-EPO- Sca1 MID (M)	74	24.562	26.97																	24.79			23.174	24.233		22.776	22.813					22.561			21.901	28.681	25.201	24.305	26.443		23.382	24.992		24.109	23.549
d1-EPO- Sca1 MID (M)	75	24.444			22.172	26.685		23.989	21.221					23.215		28.802	23.287			25.192			21.929	25.627		23.505	21.162					23.162		27.116	22.663			24.482			21.774	26.418		23.384	21.351
d1-EPO- Sca1 MID (M)	76	28.081			24.954			27.056	28.374					26.87			23.123			29.02			24.812			25.962	29.28					26.627			22.834						24.931			28.772	28.213
d1-EPO- Sca1 MID (M)	77	24.702			23.16	29.343		26.251	25.22					24.372	27.48		23.999		28.843	24.863			22.823			25.908	26.144					24.103			23.469	28.924		24.828			23.095	29.379		26.409	25.655
d1-EPO- Sca1 MID (M)	78	23.841			21.93	28.294		25.997	24.761					22.799			25.421			23.565			21.945	29.239		25.635	25.679					22.899			24.959			23.503			21.848	29.032		25.418	24.98
d1-EPO- Sca1 MID (M)	79	23.112			21.484	24.301	26.803	22.686	21.522					21.982	28.449	27.046	20.374		29.476	23.18	29.382		21.332	24.706	26.365	22.429	21.387					21.923	28.879	25.77	20.52	27.1	28.956	23.116			21.078	24.343	27.436	22.237	21.303
d1-EPO- Sca1 MID (M)	80	25.654	26.986		24.681	25.693		24.159	24.754							23.126	21.352	28.156	23.956				24.668	25.698								23.798		23.213	21.425	28.542	23.653	25.651	26.694		24.361	25.639		24.169	24.635
d1-EPO- Sca1 MID (M)	81	23.731			22.418	27.844		24.941	24.972					25.014			25.806			23.959			22.37	27.047		25.662	24.986					24.194			25.476			24.171			22.633	28.246		25.074	25.121
d1-EPO- Sca1 MID (M)	82	24.16			25.952			26.321	25.133			28.912		25.123				26.785	26.378	24.615			25.308	26.365	26.698					28.828		24.788				26.875	26.364	24.635			25.222	26.67	26.325	26.369	25.875
d1-EPO- Sca1 MID (M)	83	25.419			23.685	28.271			24.289					24.689			24.342			25.434			23.941	28.164			24.64					24.967			24.321			25.48			23.804				24.607
d1-EPO- Sca1 MID (M)	84	23.94			22.814	29.577		22.635	21.219					25.403			19.563		26.202	23.667			22.716	29.433		22.384	21.425					25.326			19.458		25.907	24.242			22.903	29.545		22.714	21.53
d1-EPO- Sca1 MID (M)	85	25.399			22.812	29.244		25.333						25.376			23.738			25.816			23.199	29.56		26.124	29.229					25.13			24.773			25.104			23.276	29.483		25.805	28.294
d1-EPO- Sca1 MID (M)	86				23.906	24.813		25.282	22.371					24.125		23.307	19.977		24.463				23.901	25.128		23.92	22.161					24.522		23.416	19.73		24.425				23.831	24.004		24.393	21.431
d1-EPO- Sca1 MID (M)	87	25.614			23.443	25.532		24.382	24.332					23.68			22.618	27.054		29.869			23.575	25.151		24.523	24.004					23.5			22.543	28.02	27.509	26.495			23.043	25.452		24.513	23.579
d1-EPO- Sca1 MID (M)	88				29.433									28.634									28.9									29.175													29.242
d1-EPO- Sca1 MID (M)	89	24.555			23.267	27.374		25.602	25.084					23.233			23.868		29.391	24.915			23.367	29.328		25.838	24.973					23.475			24.298			24.15			23.544	26.722		25.8	25.027
d1-EPO- Sca1 MID (M)	90	25.493			24.06			24.503	26.07					24.562			25.688	28.334		25.086			24.296			24.885	25.866					25.031			26.524	28.792		26.046			24.15			24.485	25.776
d1-EPO- Sca1 MID (M)	91	23.754			21.599	25.135		23.444	21.185					24.061			21.36	29.873		24.129			21.796	25.019		23.426	21.199					23.981			21.295			24.061			21.609	25.63		23.091	21.127
d1-EPO- Sca1 MID (M)	92	24.914			22.691	28.355		24.276	22.884					24.054			22.391	28.826	27.478	25.353			22.665	29.18		24.489	23.243					24.216			22.754		27.565	24.791			22.632			24.629	22.885
d1-EPO- Sca1 MID (M)	93	24.414			22.38	26.051		23.691	22.505					22.71			23.488		26.702	25.007			22.429	26.423		24.251	22.463					22.847			23.326		26.197	24.824			22.71	27.2		23.87	22.035
d1-EPO- Sca1 MID (M)	94	25.411			24.543	27.044		26.271	22.755		28.288			23.885			22.075		28.058	25.908			24.645	27.118		26.199	23.071					24.4			22.047		26.476	27.536			24.438	28.431		25.917	22.9		28.134
d1-EPO- Sca1 MID (M)	95	23.448			22.538	26.95		23.238	23.657					22.865			21.158		28.601	23.583			22.262	27.128		23.342	24.039					22.511			21.407		29.265	23.551			22.181	26.543		23.226	23.634
d1-EPO- Sca1 MID (M)	96	25.284			22.791	27.194		25.628	23.482					23.849			22.454		29.604	25.233			23.229	26.484		25.475	24.649					24.486			22.605			24.74			23.075	27.492		25.926	23.868
d1-EPO- Sca1 MID (M)	97	23.222	22.694		21.5	25.58		24.58			26.454						23.076			23.392	27.752		21.698	25.416								21.859		25.369	23.542	28.726		23.263	26.423					24.13			26.054
d1-EPO- Sca1 MID (M)	98				23.439														22.664			21.491	24.956			22.455											23.173			21.789				22.807
d1-EPO- Sca1 MID (M)	99	23.741			22.462	27.851		24.931	24.914					25.017			25.841			23.985			22.325	27.074		25.665	24.941					24.119			25.424			24.177			22.652	28.254		25.074	25.154
d1-EPO- Sca1 MID (M)	100		26.774		23.341	25.511		24.621	24.174					24.874			22.541				26.411		23.321	24.654		23.852	22.752	26.942				23.254			22.041	27.389		27.057	26.075		23.198	24.435		25.455	23.54
d1-EPO- Sca1 HIGH (H)	101				22.199	25.547		24.762	22.776					22.95		24.669	22.621			25.838			24.176			25.487	23.663					24.138		23.81	22.803			24.757	27.465		23.215			24.013	22.744
d1-EPO- Sca1 HIGH (H)	102				25.561			25.072						26.213			22.761			25.873	25.918		26.364	25.446		24.98	23.72								23.607	28.009	25.144							25.061
d1-EPO- Sca1 HIGH (H)	103	26.305				26.193		23.828	25.945					24.087							27.598		25.194			23.99	25.4					23.21			23.523				27.2
d1-EPO- Sca1 HIGH (H)	104				24.335			24.314	24.224					26.894			25.365		24.622				29.104	24.986		24.081	22.423					26.511									29.241				22.593
d1-EPO- Sca1 HIGH (H)	105				24.082	24.61		22.21	24.916								23.039			24.828	27.185		22.925	25.169		22.312	21.882					24.791			21.496				27.447	27.835	27.675	24.518		22.771	23.267
d1-EPO- Sca1 HIGH (H)	106		28.572		22.794	26.374		25.67	24.83					26.636						26.742	29.528		22.855			26.643	25.319					22.815			24.148		27.177		28.098		23.29	26.003		25.649	26.122
d1-EPO- Sca1 HIGH (H)	107	26.004	27.475		23.29	25.258		21.798	21.978					22.692			20.921			24.385			22.853	25.108		21.672	21.43				26.875	22.408			20.047		25.574	24.663	27.573		22.705	25.604		22.421	22.144				26.738
d1-EPO- Sca1 HIGH (H)	108		27.498		26.215			24.744	24.655								23.608						25.28			24.69	23.102				26.62				24.528			24.858			24.613			23.741					26.896
d1-EPO- Sca1 HIGH (H)	109		27.38		24.311	25.658		22.624						24.193		24.169	20.657					27.553	24.221			24.261	25.069				26.535	23.036			20.731				27.674		23.676	25.787		24.687	23.057				26.987
d1-EPO- Sca1 HIGH (H)	110		26.681		23.685	25.223		23.8	23.016																							24			22.574						22.717			23.167	23.143
d1-EPO- Sca1 HIGH (H)	111		25.95		22.721	25.295		24.749	24.039								23.391			24.114			22.145			23.174	26.047					23.865			24.668	26.544			26.078		21.081			23.406	22.315
d1-EPO- Sca1 HIGH (H)	112	24.999			23.576			23.813	24.591					24.103			22.847			24.701						24.132	23.286					22.399		24.682	22.784						25.053	25.111		23.81	23.962
d1-EPO- Sca1 HIGH (H)	113	24.977				25.127			23.879				26.352	23.319			24.324		25.015				24.071			24.775	24.785				26.238	24.223			23.3			25.485	27.371		23.882				23.62
d1-EPO- Sca1 HIGH (H)	114		27.866		24.34	26.406		25.063	23.31					24.845							27.766		24.021	24.333			25.339					23.603		25.631	23.41			25.664	27.443		22.906			24.572	25.062
d1-EPO- Sca1 HIGH (H)	115	25.747	27.41		24.135			23.09	25.032					24.69			23.503			26						23.25						25.056			22.236			24.639			23.585			23.417
d1-EPO- Sca1 HIGH (H)	116	25.793			23.04			24.389	26.252					24.865		24.648	22.633			25.651			23.507				27.59					23.561			24.079	28.497			26.08		23.053				26.646
d1-EPO- Sca1 HIGH (H)	117		27.784		23.589	25.814								23.578			22.82									24.189	26.063								23.193									24.925	23.471
d1-EPO- Sca1 HIGH (H)	118				24.135									25.115			24.482		25.142				25.166									24.957				27.833			27.079					24.166	24.118
d1-EPO- Sca1 HIGH (H)	119	26.021			22.826	25.47		22.965	25.23					24.247			22.529			25.96	26.661		23.244				23.229					25.436			23.497				27.64		22.496			23.891	25.506				26.464
d1-EPO- Sca1 HIGH (H)	120				23.599	25.289		25.088	24.817					23.397			23.577				27.597		23.593			25.105	23.953					25.442			23.483			25.831	26.071		23.638			24.992	23.298
d1-EPO- Sca1 HIGH (H)	121		27.804		24.308			25.038	24.397					24.376			22.8			26.197	27			25.378			24.296								22.59			25.224			23.628			26.662	24.877
d1-EPO- Sca1 HIGH (H)	122								24.796																							24.763				28.606			26.301		27.692				25.081
d1-EPO- Sca1 HIGH (H)	123	24.706	26.477		22.836			22.357	24.788				26.565	23.376			21.625	29.674		24.112	27.676		22.734			24.384	24.134					23.688		24.805	21.72			24.348			23.065			22.697	23.281
d1-EPO- Sca1 HIGH (H)	124	25.691	27.348		22.837			22.064	22.941					22.506		24.231	21.826			23.785	26.361		24.951	25.369		22.021	22.777				26.217	23.169			23.884		24.872	24.706	26.198		22.075	25.455		22.229	23.75
d1-EPO- Sca1 HIGH (H)	125			22.455																		22.488																		22.201
d1-EPO- Sca1 HIGH (H)	126					25.698													25.791						26.241	23.987	24.563							24.402	27.659	27.56	25.278					25.833	26.208	23.458	24.939
d1-EPO- Sca1 HIGH (H)	127			23.086		26.365		25.452								23.195						23.085			25.819	25.386								23.128							25.476	26.185	25.934
d1-EPO- Sca1 HIGH (H)	128					25.47		23.971	22.947								24.64							25.693			22.875														22.822			23.97
d1-EPO- Sca1 HIGH (H)	129				21.587	22.6			22.462					22.837		25.561	22.95	26.463		24.289	24.373		21.61	26.265		24.551	22.365					23.021		25.322	22.938	26.365		24.563	24.563			24.525		24.365
d1-EPO- Sca1 HIGH (H)	130	25.83	27.786		21.359	22.718		22.632						26.977	28.772	24.605		27.385		25.014	27.459		21.728	26.98		23.285	23.444					27.799		24.592	23.618	27.551		25.688	27.521		21.745	25.43		23.262	23.721
d1-EPO- Sca1 HIGH (H)	131	24.392	25.629		23.366	23.529										25.495	22.847	26.703		24.891	25.942		23.249	26.763		24.347	25.322					24.39		25.02	22.232	27.497		24.273	25.752		23.354	26.401		24.288	25.732
d1-EPO- Sca1 HIGH (H)	132							23.69	22.682							24.157		25.798		25.894	23.722		21.549				22.035					22.742		24.973	23.822	25.156		25.563	23.966		21.532			23.875	21.789
d1-EPO- Sca1 HIGH (H)	133	25.526			24.684														27.842	25.616			25.554			27.886	22.262					26.71						25.6			24.663			26.681	22.816
d1-EPO- Sca1 HIGH (H)	134					26.365			22.654								22.339			23.036	22.137	25.746	21.804	26.213							26.49	23.648					25.917	23.431	22.93	25.833					22.282				26.055
d1-EPO- Sca1 HIGH (H)	135				22.617	25.758		24.193	24.118			26.872	27.029				22.631			25.532	27.366		22.588	25.544		24.532						23.652	26.827					25.395			22.116				24.838			26.836	27.768
d1-EPO- Sca1 HIGH (H)	136				21.639	24.95		23.908	22.968		25.419	26.299		22.977		25.078	22.875		27.369	23.811				25.177		23.552			25.734	26.299								23.968			21.795	25.023			22.963
d1-EPO- Sca1 HIGH (H)	137		26.902	25.214	23.78	25.395		25.285	23.805							24.524	24.049			24.424	25.738	24.963	23.707	25.33														24.563		25.29	23.443			25.365	23.654
d1-EPO- Sca1 HIGH (H)	138				24.581													26.23	25.235	25.639						25.977	27.092							24.943	24.59	26.955	25.052	25.743			24.551			26.655	26.949
d1-EPO- Sca1 HIGH (H)	139				22.399	25.447		24.662	22.676					22.855		24.569	22.521			25.938			24.376			25.587	23.563					24.338		23.951	22.413			24.427	27.535		23.315			24.313	22.544
d1-EPO- Sca1 HIGH (H)	140					25.11			24.902					23.689								24.088	23.208	25.963						28.206		23.51								23.173	23.856							28.166
d1-EPO- Sca1 HIGH (H)	141	24.879			23.542			23.862	24.545					24.152			22.874			24.774						24.163	23.236					22.353		24.672	22.744						25.123	25.125		23.851	23.942
d1-EPO- Sca1 HIGH (H)	142	25.421	27.352		22.652			22.078	22.963					22.563		24.275	21.865			23.765	26.345		24.975	25.363		22.036	22.754				26.236	23.163			23.834		24.872	24.765	26.168		22.036	25.452		22.242	23.765
d1-EPO- Sca1 HIGH (H)	143			23.014		26.345		25.478								23.199						23.096			25.875	25.345								23.118							25.475	26.142	25.963
d1-EPO- Sca1 HIGH (H)	144	24.856			23.452			23.836	24.578					24.155			22.885			24.775						24.163	23.242					22.377		24.672	22.764						25.036	25.136		23.851	23.942
d1-EPO- Sca1 HIGH (H)	145	26.452			23.623		27.735	26.654	27.136			24.645		26.339			25.174			26.322		27.825	23.445		27.336	26.528				24.654		25.638			25.536			26.175		27.845	23.515	28.942	27.252	26.325	27.21			25.332
d1-EPO- Sca1 HIGH (H)	146				26.32				24.08					26.808			23.477						26.322				24.563					26.483		25.365	26.623						26.302
d1-EPO- Sca1 HIGH (H)	147		24.902	24.425		27.819		26.348				27.176		26.949		25.292	23.123		26.366		25.177	24.775	24.627		26.365	25.753	24.162				26.536	26.151		25.213	24.967		26.05	27.229		24.602	24.036	27.499			24.71			27.524	26.29
d1-EPO- Sca1 HIGH (H)	148		21.979		23.871				24.144							24.242	22.866		25.621					24.884			24.432			25.49	26.501	23.812		25.288	23.199		25.112		21.149		23.843	24.442						25.179	26.628
d1-EPO- Sca1 HIGH (H)	149	24.985				25.141			23.885				26.355	23.371			24.311		25.074				24.077			24.752	24.741				26.268	24.235			23.423			25.454	27.387		23.854				23.632
d1-EPO- Sca1 HIGH (H)	150				22.341	25.471		24.601	22.632					22.862		24.574	22.521			25.921			24.318			25.557	23.573					24.374		23.957	22.454			24.421	27.542		23.374			24.387	22.552
d3-EPO- Sca1 EXTREME LOW(L')	151	24.681	14.808		25.772	28.047		22.48	22.215	23.703			24.294	25.202	26.52	22.9	24.399		24.009	24.413	14.755		26.46	28.381		22.694	22.173	24.018			24.268	26.142	27.043	23.191	24.775		24.041	24.512	14.994		25.901	29.217		23.486	22.585	23.447			24.415
d3-EPO- Sca1 EXTREME LOW(L')	152	24.493	19.027		23.181	24.536		22.811	22.688	27.03			24.99	25.858	26.061	22.898	23.41	28.883	23.013	25.021	19.034		23.639	23.776		22.609	22.633	26.326			24.949	25.078	25.949	22.375	23.309	28.812	24.194	25.163	19.355		23.431	23.862		22.728	22.964	26.946			25.317
d3-EPO- Sca1 EXTREME LOW(L')	153		21.785		24.025			24.082	23.265	28.839			25.29	23.002		24.041	21.219		25.058		21.995		23.834			24.734	23.634	28.662			24.237	23.229		24.02	21.482		25.303		21.728		23.808			24.522	23.732	28.58			23.698
d3-EPO- Sca1 EXTREME LOW(L')	154	26.753	21.723			25.764		25.327	23.12	27.697			23.354	24.542		24.274	22.68		25.752	26.064	21.709			24.904		24.569	23.347	27.717			23.436	24.348		23.998	23.004		25.4	26.546	21.745			25.165		25.224	23.25	27.88			23.149
d3-EPO- Sca1 EXTREME LOW(L')	155	26.66	20.051	24.841	23.286	25.185		24.635	21.908	25.849			24.907	23.391		23.118	20.918		23.529	27.264	20.084	25.533	23.083	24.842		25.153	22.282	26.643			24.541	23.135		24.016	21.033	28.098	23.798	27.176	19.995	25.828	23.337	25.164		24.783	22.109	26.27			24.264
d3-EPO- Sca1 EXTREME LOW(L')	156	24.791	17.378		25.654	25.012		23.13	21.54	23.507			22.553	23.481		21.419	22.303		23.096	25.031	17.239		25.201	24.666		23.236	21.658	23.725			22.96	23.216		21.566	22.349		22.989	24.717	17.382		24.869	24.828		22.965	21.376	23.396			22.641
d3-EPO- Sca1 EXTREME LOW(L')	157	26.243	22.291		24.661	25.743			22.403	27.272			24.846	24.249		26.307	22.803	29.144	24.562	26.748	22.648		24.273	25.96			22.624				24.281	23.961		25.185	22.866		24.408	27.018	22.446		24.15	25.522			22.412				24.063
d3-EPO- Sca1 EXTREME LOW(L')	158	26.013	20.16	24.877	24.892	26.996		24.757	23.862	25.418			25.401	24.948		23.88	21.577		28.425	25.771	20.127	24.589	24.7	26.972		24.584	24.011	25.805			24.64	24.936		24.806	21.362		28.256	26.238	19.983	24.714	24.957	27.446		24.226	24.078	25.884			25.668
d3-EPO- Sca1 EXTREME LOW(L')	159	26.212	21.524		23.488	25.378		26.288	22.481	23.768			24.867	23.345	26.219	24.043	22.629		24.844	25.64	21.755		23.484	25.71		26.323	22.941	23.923			25.211	23.148	26.062	24.87	23.021		24.679	25.69	21.718		23.231	25.558		26.578	22.828	23.509			23.769
d3-EPO- Sca1 EXTREME LOW(L')	160		18.441			28.099		27.767	22.061	24.366			23.726	25.346		23.122	23.49		23.94		18.571		27.598	27.272		27.618	22.521	24.857			23.397	25.807		23.214	23.898		24.227		18.504			27.438		28.191	22.47	24.081			24.108
d3-EPO- Sca1 EXTREME LOW(L')	161	25.769	21.79		25.61	26.869		24.31	23.205	26.46			23.989	23.318	25.787	25.7	21.061		25.307	25.06	21.936		25.318	25.758		24.653	23.274	27.019			24.165	23.198	25.809	25.005	21.163		25.755	24.452	21.63		25.707	26.315		24.174	23.233	26.506			24.079
d3-EPO- Sca1 EXTREME LOW(L')	162	25.332	21.98		24.388	26.572		24.826	23.051				24.263	25.664	27.422	24.741	21.528		25.792	25.411	21.729		24.397	27.158		25.326	23.477	26.5			24.018	25.21	27.352	25.086	20.818		25.232	25.778	21.919		24.463	27.41		25.88	23.231	27.139			24.246
d3-EPO- Sca1 EXTREME LOW(L')	163		17.887		24.937	24.913		25.752	21.722	26.1			25.051	22.61	26.232	22.575	22.257		23.485	25.547	19.005		25.402	24.999			20.198	26.09			26.277	23.215	25.367		21.453		23.941	26.334	18.953		24.727			24.138	20.839	26.201			25.458
d3-EPO- Sca1 EXTREME LOW(L')	164	27.541	21.805		23.73	25.511			23.656				25.094	23.682		25.557	23.593		25.301	27.166	21.988		24.123	26.677			24.348				25.3	23.867		25.534	22.672		25.194	26.793	21.876		24.114	26.053			24.046				24.539
d3-EPO- Sca1 EXTREME LOW(L')	165	26.387	20.992	25.968	24.383	24.908		25.013	22.463	25.547			24.946	24.326	26.262	23.619	24.103		23.468	26.337	20.88	26.202	24.57	24.767		25.047	22.693	26.161			24.524	24.453	26.607	24.079	24.794		23.696	25.935	20.772	26.118	24.68	25.107		24.616	22.235	25.978			24.43
d3-EPO- Sca1 EXTREME LOW(L')	166	26.068	19.241		24.106	27.126		25.228	22.035	26.318			23.206	22.729		24.069	21.815	28.131	24.588	26.207	19.389		23.723	26.936		24.936	22.235	25.628			23.397	22.58		24.468	21.849	28.004	24.405	26.043	19.306		23.829	27.892		25.356	22.179	25.485			23.359
d3-EPO- Sca1 EXTREME LOW(L')	167	25.08	20.469		25.803	25.716		24.234	21.791	25.52			23.912	24.221	27.839	25.646	22.004	28.206	25.423	24.23	20.324		25.746	25.582		24.541	22.288				23.966	24.557	26.374	26.009	22.22	28.144	25.887	24.371	20.443		25.625	25.529		24.326	22.231	25.275			24.447
d3-EPO- Sca1 EXTREME LOW(L')	168	25.988	18.876		26.196	25.927		23.54	21.648	24.307			23.758	24.388		23.709	23.042		24.281	27.067	19.033		26.426	25.572		23.665	22.195	24.507			23.123	24.774		22.911	23.368		24.163	26.504	18.977		25.631	25.558		23.807	22.101	24.399			23.474
d3-EPO- Sca1 EXTREME LOW(L')	169	24.906	19.446			27.109			22.749				25.841	24.839	25.13	25.249	24.205		24.743	26.362	20.101			26.884			21.653				24.813	25.072	25.443		23.633		25.376	25.407	20.098			26.533			22.364				25.142
d3-EPO- Sca1 EXTREME LOW(L')	170		19.701			27.575			24.202				25.949	25.49		25.61			25.865		19.551			26.956			24.358				25.418	25.634		26.327			25.649		19.63			26.625			25.06				25.083
d3-EPO- Sca1 EXTREME LOW(L')	171	25.559	20.498		25.769	28.123		26.759	22.003	27.055			23.614	23.662	25.156	26.134	21.378		26.019	26.799	20.587		25.513	27.886		26.634	23.19				23.341	23.753	25.783	25.573	21.636		26.344	25.773	20.214		25.651	28.2		26.582	23.011				23.301
d3-EPO- Sca1 EXTREME LOW(L')	172	28.105	20.702		25.253	25.893			22.442	27.525			23.516	27.001	25.54	27.037	22.422		25.272		20.729		25.249	25.086			22.395	27.734			23.114	27.218	25.471	25.926	22.939		25.09	27.964	21.152		24.862	25.713			22.536	27.543			23.238
d3-EPO- Sca1 EXTREME LOW(L')	173	25.409	23.72		24.542	25.65		24.601	22.953				24.166	24.59	26.419	25.646	24.424		25.256	24.954	23.755		24.826	27.202		25.098	23.361				24.824	24.889	26.173	25.701	24.332		25.87	24.65	23.833		24.208	26.033		25.039	23.23				25.238
d3-EPO- Sca1 EXTREME LOW(L')	174	25.079	20.388	25.92	23.602	26.166		26.118	22.175	28.535			24.16	23.266	25.446	25.905	23.681	27.302	26.613	26.009	20.353	26.026	23.689	25.274		26.491	22.631	28.611			25.185	23.355	25.251	25.317	23.373	27.802	25.861	25.084	19.996	26.34	23.64	25.95		26.094	22.797	28.365			24.252
d3-EPO- Sca1 EXTREME LOW(L')	175	27.306	21.57		23.495	25.276			23.421				24.859	23.447		25.322	23.358		25.066	26.931	21.753		23.888	26.442			24.113				25.065	23.632		25.299	22.437		24.959	26.558	21.641		23.879	25.818			23.811				24.304
d3-EPO- Sca1 EXTREME LOW(L')	176	25.977	21.289		23.253	25.143		26.053	22.246	23.533			24.632	23.11	25.984	23.808	22.394		24.609	25.405	21.52		23.249	25.475		26.088	22.706	23.688			24.976	22.913	25.827	24.635	22.786		24.444	25.455	21.483		22.996	25.323		26.343	22.593	23.274			23.534
d3-EPO- Sca1 EXTREME LOW(L')	177		18.206			27.864		27.532	21.826	24.131			23.491	25.111		22.887	23.255		23.705		18.336		27.363	27.037		27.383	22.286	24.622			23.162	25.572		22.979	23.663		23.992		18.269			27.203		27.956	22.235	23.846			23.873
d3-EPO- Sca1 EXTREME LOW(L')	178	26.425	19.816	24.606	23.051	24.95		24.4	21.673	25.614			24.672	23.156		22.883	20.683		23.294	27.029	19.849	25.298	22.848	24.607		24.918	22.047	26.408			24.306	22.9		23.781	20.798	27.863	23.563	26.941	19.76	25.593	23.102	24.929		24.548	21.874	26.035			24.029
d3-EPO- Sca1 EXTREME LOW(L')	179	26.152	20.757	25.733	24.148	24.673		24.778	22.228	25.312			24.711	24.091	26.027	23.384	23.868		23.233	26.102	20.645	25.967	24.335	24.532		24.812	22.458	25.926			24.289	24.218	26.372	23.844	24.559		23.461	25.7	20.537	25.883	24.445	24.872		24.381	22	25.743			24.195
d3-EPO- Sca1 EXTREME LOW(L')	180	24.556	17.143		25.419	24.777		22.895	21.305	23.272			22.318	23.246		21.184	22.068		22.861	24.796	17.004		24.966	24.431		23.001	21.423	23.49			22.725	22.981		21.331	22.114		22.754	24.482	17.147		24.634	24.593		22.73	21.141	23.161			22.406
d3-EPO- Sca1 EXTREME LOW(L')	181	24.446	14.573		25.537	27.812		22.245	21.98	23.468			24.059	24.967	26.285	22.665	24.164		23.774	24.178	14.52		26.225	28.146		22.459	21.938	23.783			24.033	25.907	26.808	22.956	24.54		23.806	24.277	14.759		25.666	28.982		23.251	22.35	23.212			24.18
d3-EPO- Sca1 EXTREME LOW(L')	182	24.258	18.792		22.946	24.301		22.576	22.453	26.795			24.755	25.623	25.826	22.663	23.175	28.648	22.778	24.786	18.799		23.404	23.541		22.374	22.398	26.091			24.714	24.843	25.714	22.14	23.074	28.577	23.959	24.928	19.12		23.196	23.627		22.493	22.729	26.711			25.082
d3-EPO- Sca1 EXTREME LOW(L')	183	25.753	18.641		25.961	25.692		23.305	21.413	24.072			23.523	24.153		23.474	22.807		24.046	26.832	18.798		26.191	25.337		23.43	21.96	24.272			22.888	24.539		22.676	23.133		23.928	26.269	18.742		25.396	25.323		23.572	21.866	24.164			23.239
d3-EPO- Sca1 EXTREME LOW(L')	184	25.174	23.485		24.307	25.415		24.366	22.718				23.931	24.355	26.184	25.411	24.189		25.021	24.719	23.52		24.591	26.967		24.863	23.126				24.589	24.654	25.938	25.466	24.097		25.635	24.415	23.598		23.973	25.798		24.804	22.995				25.003
d3-EPO- Sca1 EXTREME LOW(L')	185	25.324	20.263		25.534	27.888		26.524	21.768	26.82			23.379	23.427	24.921	25.899	21.143		25.784	26.564	20.352		25.278	27.651		26.399	22.955				23.106	23.518	25.548	25.338	21.401		26.109	25.538	19.979		25.416	27.965		26.347	22.776				23.066
d3-EPO- Sca1 EXTREME LOW(L')	186	24.671	19.211			26.874			22.514				25.606	24.604	24.895	25.014	23.97		24.508	26.127	19.866			26.649			21.418				24.578	24.837	25.208		23.398		25.141	25.172	19.863			26.298			22.129				24.907
d3-EPO- Sca1 EXTREME LOW(L')	187		19.466			27.34			23.967				25.714	25.255		25.375			25.63		19.316			26.721			24.123				25.183	25.399		26.092			25.414		19.395			26.39			24.825				24.848
d3-EPO- Sca1 EXTREME LOW(L')	188		21.55		23.79			23.847	23.03	28.604			25.055	22.767		23.806	20.984		24.823		21.76		23.599			24.499	23.399	28.427			24.002	22.994		23.785	21.247		25.068		21.493		23.573			24.287	23.497	28.345			23.463
d3-EPO- Sca1 EXTREME LOW(L')	189	26.518	21.488			25.529		25.092	22.885	27.462			23.119	24.307		24.039	22.445		25.517	25.829	21.474			24.669		24.334	23.112	27.482			23.201	24.113		23.763	22.769		25.165	26.311	21.51			24.93		24.989	23.015	27.645			22.914
d3-EPO- Sca1 EXTREME LOW(L')	190	25.833	19.006		23.871	26.891		24.993	21.8	26.083			22.971	22.494		23.834	21.58	27.896	24.353	25.972	19.154		23.488	26.701		24.701	22	25.393			23.162	22.345		24.233	21.614	27.769	24.17	25.808	19.071		23.594	27.657		25.121	21.944	25.25			23.124
d3-EPO- Sca1 EXTREME LOW(L')	191	25.534	21.555		25.375	26.634		24.075	22.97	26.225			23.754	23.083	25.552	25.465	20.826		25.072	24.825	21.701		25.083	25.523		24.418	23.039	26.784			23.93	22.963	25.574	24.77	20.928		25.52	24.217	21.395		25.472	26.08		23.939	22.998	26.271			23.844
d3-EPO- Sca1 EXTREME LOW(L')	192	25.097	21.745		24.153	26.337		24.591	22.816				24.028	25.429	27.187	24.506	21.293		25.557	25.176	21.494		24.162	26.923		25.091	23.242	26.265			23.783	24.975	27.117	24.851	20.583		24.997	25.543	21.684		24.228	27.175		25.645	22.996	26.904			24.011
d3-EPO- Sca1 EXTREME LOW(L')	193	24.844	20.153	25.685	23.367	25.931		25.883	21.94	28.3			23.925	23.031	25.211	25.67	23.446	27.067	26.378	25.774	20.118	25.791	23.454	25.039		26.256	22.396	28.376			24.95	23.12	25.016	25.082	23.138	27.567	25.626	24.849	19.761	26.105	23.405	25.715		25.859	22.562	28.13			24.017
d3-EPO- Sca1 EXTREME LOW(L')	194	27.87	20.467		25.018	25.658			22.207	27.29			23.281	26.766	25.305	26.802	22.187		25.037		20.494		25.014	24.851			22.16	27.499			22.879	26.983	25.236	25.691	22.704		24.855	27.729	20.917		24.627	25.478			22.301	27.308			23.003
d3-EPO- Sca1 EXTREME LOW(L')	195	26.008	22.056		24.426	25.508			22.168	27.037			24.611	24.014		26.072	22.568	28.909	24.327	26.513	22.413		24.038	25.725			22.389				24.046	23.726		24.95	22.631		24.173	26.783	22.211		23.915	25.287			22.177				23.828
d3-EPO- Sca1 EXTREME LOW(L')	196	25.778	19.925	24.642	24.657	26.761		24.522	23.627	25.183			25.166	24.713		23.645	21.342		28.19	25.536	19.892	24.354	24.465	26.737		24.349	23.776	25.57			24.405	24.701		24.571	21.127		28.021	26.003	19.748	24.479	24.722	27.211		23.991	23.843	25.649			25.433
d3-EPO- Sca1 EXTREME LOW(L')	197	24.845	20.234		25.568	25.481		23.999	21.556	25.285			23.677	23.986	27.604	25.411	21.769	27.971	25.188	23.995	20.089		25.511	25.347		24.306	22.053				23.731	24.322	26.139	25.774	21.985	27.909	25.652	24.136	20.208		25.39	25.294		24.091	21.996	25.04			24.212
d3-EPO- Sca1 EXTREME LOW(L')	198		17.652		24.702	24.678		25.517	21.487	25.865			24.816	22.375	25.997	22.34	22.022		23.25	25.312	18.77		25.167	24.764			19.963	25.855			26.042	22.98	25.132		21.218		23.706	26.099	18.718		24.492			23.903	20.604	25.966			25.223
d3-EPO- Sca1 EXTREME LOW(L')	199	26.108	21.42		23.384	25.274		26.184	22.377	23.664			24.763	23.241	26.115	23.939	22.525		24.74	25.536	21.651		23.38	25.606		26.219	22.837	23.819			25.107	23.044	25.958	24.766	22.917		24.575	25.586	21.614		23.127	25.454		26.474	22.724	23.405			23.665
d3-EPO- Sca1 EXTREME LOW(L')	200	25.904	21.952		24.322	25.404			22.064	26.933			24.507	23.91		25.968	22.464	28.805	24.223	26.409	22.309		23.934	25.621			22.285				23.942	23.622		24.846	22.527		24.069	26.679	22.107		23.811	25.183			22.073				23.724
d3-EPO- Sca1 LOW(L)	201				23.302									22.507		23.323							23.429									21.961
d3-EPO- Sca1 LOW(L)	202		21.742			25.154		25.978	22.568				25.297	25.567		25.899	24.608				21.965			25.568		26.426	23.029				25.231	25.592		25.869	24.397	29.103	28.594					25.672		26.378	22.647				24.82
d3-EPO- Sca1 LOW(L)	203		27.288						27.572					27.664			24.72			29.329	26.761						26.546					27.594			25.066			29.119							26.821
d3-EPO- Sca1 LOW(L)	204		21.465		23.32	24.196			23.059				26.704	24.962		24.234	21.687		24.254		21.226		23.129	24.284			23.676				27.08	25.416		24.821	21.61		24.475		21.359		23.067	24.579			23.827				26.105
d3-EPO- Sca1 LOW(L)	205				24.547			22.333	22.916					23.125		25.455	21.224						24.847			22.388	22.895					23.454		25.921	20.813						24.728			22.833	23.051
d3-EPO- Sca1 LOW(L)	206		26.748						23.717							27.248	21.224	28.879			26.001						24.054							27.948	21.298				26.599						23.915
d3-EPO- Sca1 LOW(L)	207	24.956	23.775		25.464			22.498	22.412				23.947	27.521		25.27	21.215		26.208	25.294	23.831		24.779			22.427	22.417				24.638	27.313		25.645	21.09		26.117	25.126	23.993		24.501			23.008	22.314				24.303
d3-EPO- Sca1 LOW(L)	208	25.324	22.824	25.479	23.711	25.249		25.364	24.223	27.578			27.07			24.42	23.243			24.995	22.625	24.784	23.351	25.805		24.832	24.951	27.771						25.307	23.553			25.142	22.476	25.283	23.245	25.36		25.84	24.974	27.633			26.514
d3-EPO- Sca1 LOW(L)	209		20.96						24.417					23.486		25.187	24.664		26.82		21.102		29.828				24.425					23.064		25.645	24.349		26.173		21.058		29.311				24.333
d3-EPO- Sca1 LOW(L)	210		25.906		25.828			25.883	29.287				24.95			27.688	22.179		26.875		26.144		25.562			25.401	28.478				25.389			27.409	22.743		26.638		26.863		25.667			25.568	28.362				24.904
d3-EPO- Sca1 LOW(L)	211	25.303	30.385																	25.828	29.589											27.626					29.176	25.84
d3-EPO- Sca1 LOW(L)	212	25.092	22.902		25.625	24.652		25.802	22.534	25.368			25.087	24.759		23.596	23.244		24.914	25.606	22.677		25.712	25.254		26.387	22.882	25.869			25.132	24.529		23.255	23.395		24.605	25.516	22.468		25.335	25.189		26.538	22.989	25.649			25.091
d3-EPO- Sca1 LOW(L)	213		29.562	23.443	26.517				21.51					23.596		25.863	23.463	27.438	23.032		29.481	23.52	26.731				22.558					24.293		28.293	22.862		22.939		29.362	22.968	26.774				22.485
d3-EPO- Sca1 LOW(L)	214		25.334		25.894			26.408	25.221				23.696	23.328					26.542		26.06		25.504			26.073	23.938				24.393	23.36					25.569		25.504		25.133			27.37	24.543				24.49
d3-EPO- Sca1 LOW(L)	215	23.676						28.074									25.31		29.668	24.309						27.929									24.19		29.409	23.707						27.793
d3-EPO- Sca1 LOW(L)	216													25.241			27.326		30.589				29.75									24.96					30.584				29.429
d3-EPO- Sca1 LOW(L)	217		23.565		25.516			25.454	24.472						26.721	25.241	23.196		25.661		23.695		25.804			25.472	25.001					27.996	26.883	25.045	23.1	27.88	25.235		23.277		25.62			26.032	25.183
d3-EPO- Sca1 LOW(L)	218	28.863	24.878		24.496	25.267		25.237	23.53				26.029	22.842	27.114	24.763	22.842		24.256		24.676		24.292	25.911		25.316	23.768				26.027	22.644	26.702	24.341	22.397		24.121	29.44	24.639		24.355	25.155		25.665	23.701				25.887
d3-EPO- Sca1 LOW(L)	219		25.814											28.709			28.752				26.384											28.914			28.35		30.821		26.174
d3-EPO- Sca1 LOW(L)	220		24.422	24.876				23.819	24.426					26.434	24.32	26.669	22.685		24.498		24.248	24.422				23.455	24.155					26.071	25.001	26.997	23.24		24.529		24.445	24.884				23.349	24.047
d3-EPO- Sca1 LOW(L)	221			23.932				26.186						25.697		26.394	25.027				29.506	23.863				27.225						25.817		25.213	24.687				29.487	24.558				27.213
d3-EPO- Sca1 LOW(L)	222				28.495			25.707	23.25					26.354		26.852	24.798						28.268			25.923	23.495					26.314		27.893	24.395									26.449	23.439
d3-EPO- Sca1 LOW(L)	223		24.238						23.756					26.023		24.886	24.414	27.915	26.768		24.33						24.36					25.132		24.809	24.168	28.546	25.902		24.496						23.754
d3-EPO- Sca1 LOW(L)	224		25.825						23.29					26.228	24.549	23.389	23.648	30.44	24.363		26.048						23.711					26.019	24.454	23.348	24.136		24.23		25.703						22.997
d3-EPO- Sca1 LOW(L)	225	27.852	23.149	27.497	25.804	27.811			22.918	26.944			26.298	23.479		24.258	21.574		25.706	27.729	23.234	27.222	25.936	26.903			22.813	27.311			25.507	23.494		24.773	21.438		26.139	27.487	22.98	27.112	26.421				22.931	27.355			25.598
d3-EPO- Sca1 LOW(L)	226			26.673	24.125	27.427		23.391	22.957					24.681		27.967	22.791	28.655	27.289			26.257	24.57	27.251		22.817	22.813					23.892			22.861		27.264			26.811	24.314	27.061		22.986	22.956
d3-EPO- Sca1 LOW(L)	227				24.92	27.728		24.627	24.505				27.358	24.148		26.97	22.67						24.74	27.378		25.014	24.49				26.775	24.418	28.451	27.943	22.696		28.018				24.999	28.077		24.579	24.474
d3-EPO- Sca1 LOW(L)	228	25.732	26.748		23.809	28.582		26.152	26.074					24.418			22.206			26.463	26.5		24.1	27.985		25.439	26.092					24.432			22.576		28.433	25.916	26.886		23.558			25.77	26.12
d3-EPO- Sca1 LOW(L)	229		23.477			26.297		29.095	24.749					23.088	27.272		22.43				23.202			26.314		29.275	25.144					23.584	26.561		22.68		28.168		23.27			26.398		29.139	25.031
d3-EPO- Sca1 LOW(L)	230	27.844		28.405	23.824			25.696	28.071					26.817			21.844			28.169		28.34	23.59			26.229	26.56					27.527			21.549					28.115	23.721			26.425	26.349
d3-EPO- Sca1 LOW(L)	231			26.291	26.714			26.605	26.066				26.318	23.889			22.04		26.633			26.395	26.969			26.053	26.1				26.893	24.344			21.878		26.783			26.697	26.796			26.539	25.46
d3-EPO- Sca1 LOW(L)	232			26.397	25.426	27.918		23.239	23.465					24.57			25.783		27.62		28.434	26.759	25.718	27.308		23.599	24.038					24.315			25.798				28.006	25.705	25.796	28.16		23.005
d3-EPO- Sca1 LOW(L)	233	24.735		25.831	24.361			25.227	24.145				27.326	24.352		26.123	23.997	29.206	27.212	25.581		26.191	24.616			25.294	24.152				27.158	24.263		25.079	23.908		27.86	25.257		26.074	24.435			26.038	23.947				27.227
d3-EPO- Sca1 LOW(L)	234	26.072		24.877	24.027			24.241	22.558					23.751	26.968	26.124	21.962		28.081	25.583		24.977	24.077			24.265	22.55					23.612	26.227	26.079	21.661	28.066	27.746	26.563		24.729	23.82			24.307	22.533
d3-EPO- Sca1 LOW(L)	235	27.445	23.545		26.813	25.919		24.541	23.835				24.224	24.481	26.5	28.85	24.976		26.252	26.201	23.427		26.66	25.646		24.934	23.629				24.794	24.858	26.501	29.077	24.816		26.785	27.03	23.626		26.51	25.387		24.724	23.408				24.25
d3-EPO- Sca1 LOW(L)	236	25.843	25.025	25.375	24.556	26.069		22.982	22.888				26.056	22.91	25.564	27.226	21.449	28.894	26	26.231	24.963	25.015	24.587	26.228		22.81	22.664				26.417	22.736	26.93	27.189	21.452		26.694	26.502	24.702	25.404	24.653	26.008		22.981	22.767				26.168
d3-EPO- Sca1 LOW(L)	237	25.631			22.508	27.122		24.216	22.745					22.974		27.265	23.443	28.022		26.577			22.322	26.777		24.043	23.409					22.559		27.134	23.927	27.131	29.575	26.184			22.637	27.366		24.505	23.117
d3-EPO- Sca1 LOW(L)	238				25.879			28.338					27.786	25.316			25.024						26.02			29.105					27.308	25.773			25.554				28.4		25.753			28.849					28.205
d3-EPO- Sca1 LOW(L)	239	26.087	23.163	28.73	23.412	26.016			24.024				24.578	24.558	25.659		24.482		28.057	26.255	23.635	28.178	23.829	25.74			24.292				24.381	24.281	25.768		23.545		28.227	26.432	23.453	28.131	22.819	26.035			24.248				24.095
d3-EPO- Sca1 LOW(L)	240		22.401		25.889			26.898	22.745				24.943				23.265		26.825		22.534		25.624			26.941	22.926	27.988			25.337				23.612		26.213		22.506		26.414			26.479	22.637	27.881			24.681
d3-EPO- Sca1 LOW(L)	241	26.35	27.088		25.412	27.288		25.863	25.153					25.449		28.049	21.579	28.953	27.791	25.928	26.639		25.637			26.357	25.395					26.288		27.742	21.56	28.938	27.39	26.231	26.969		25.791	26.863		25.205	24.933
d3-EPO- Sca1 LOW(L)	242	25.308	24.45	24.085	24.455	27.304		26.802	23.24				25.566	25.123	24.963	27.238	23.741		26.323	25.391	24.842	24.833	24.316	27.66		26.665	22.949				26.766	24.574	24.801	26.503	23.243		26.271	25.809	24.702	24.413	24.289	27.39		28.048	23.307				26.617
d3-EPO- Sca1 LOW(L)	243	24.721		25.817	24.347			25.213	24.131				27.312	24.338		26.109	23.983	29.192	27.198	25.567		26.177	24.602			25.28	24.138				27.144	24.249		25.065	23.894		27.846	25.243		26.06	24.421			26.024	23.933				27.213
d3-EPO- Sca1 LOW(L)	244	25.719		26.233	24.36			24.556	23.414			27.152		24.127		27.238	24.948			26.255		26.062	24.101			22.478	22.738			27.311		23.547		24.759	24.223	27.508		26.072		26.13	24.06			23.712	23.088			28.048
d3-EPO- Sca1 LOW(L)	245		23.044			25.769		27.137	22.895	27.574			24.53	24.377		26.389	28.255		25.263		22.972			25.958		27.807	23.147	27.475			23.995	24.336		26.583			25.751		22.998			25.8		27.294	23.1	27.138			24.1
d3-EPO- Sca1 LOW(L)	246				26.969			28.178	26.102				27.356	24.525		27.896	23.043		25.415				26.828			29.156	25.46				26.448	24.496		27.51	23.132		25.527				26.056			38.453	25.793				26.739
d3-EPO- Sca1 LOW(L)	247		27.783	26.407	26.066	26.571		24.705	22.905				26.052	24.806			20.811		26.722			26.318	26.12	26.168		24.781	23.406				26.191	24.696		28.781	20.778	27.72	26.501		27.515		26.763	26.415		24.948	23.715				25.731
d3-EPO- Sca1 LOW(L)	248		26.442	25.522	24.874	25.984		23.373	22.888				27.404	23.951	24.812	25.253	20.468		25.712		26.824	25.224	24.352	25.786		23.138	23.351				26.94	23.616	25.102	25.762	20.312		25.405		26.892	25.793	23.795	26.267		22.967	23.048				27.16
d3-EPO- Sca1 LOW(L)	249	26.246	26.984		25.308	27.184		25.759	25.049					25.345		27.945	21.475	28.849	27.687	25.824	26.535		25.533			26.253	25.291					26.184		27.638	21.456	28.834	27.286	26.127	26.865		25.687	26.759		25.101	24.829
d3-EPO- Sca1 LOW(L)	250		23.461		25.412			25.35	24.368						26.617	25.137	23.092		25.557		23.591		25.7			25.368	24.897					27.892	26.779	24.941	22.996	27.776	25.131		23.173		25.516			25.928	25.079
d3-EPO- Sca1 HIGH (H)	251	25.431		23.33				23.216	22.144					26.94		25.957	22.436		23.785	24.759	29.824	23.382				23.181	22.684					26.528		26.144	22.94		23.773	24.842	29.354	23.184				23.667	22.758
d3-EPO- Sca1 HIGH (H)	252				23.717			21.74	21.964					23.897		25.738	21.11		23.573				23.885				21.891					23.673			20.548		23.656				23.749			21.104	21.711
d3-EPO- Sca1 HIGH (H)	253				24.186			25.274	24.761								28.221		28.601				24.845			25.685	24.897					27.747			28.076		28.209				24.063			25.977	24.586
d3-EPO- Sca1 HIGH (H)	254	23.94			25.452			25.05	25.07					25.958		24.021	22.17		25.753	23.548			25.182			25.2	24.883					26.737		23.424	21.703		25.262	23.711			24.631			25.092	24.623
d3-EPO- Sca1 HIGH (H)	255			23.71	23.613			22.964	22.844								23.557					23.462	23.672			22.737	23.124								24.513					23.215	24.086			23.538	22.808
d3-EPO- Sca1 HIGH (H)	256				23.415		24.426		23.779					27.336		27.4			29.993				23.236		24.103		24.35					27.938		27.525							23.232		24.281		24.454
d3-EPO- Sca1 HIGH (H)	257	24.944	25.77		21.8			22.823	21.825					24.202		24.997	21.261			24.591	25.849		21.998			22.236	22.037					24.155		24.944	21.31			24.442	25.22		21.903			22.813	21.833
d3-EPO- Sca1 HIGH (H)	258		24.108		28.65			22.813	24.678					23.836			22.457		25.977		24.067					22.778	24.79					24.536			22.312		25.975		23.899		28.1			24.25	24.293
d3-EPO- Sca1 HIGH (H)	259							24.199	22.312					26.604		26.076	23.934									23.825	22.339					26.66		26.118	23.249									24.636	22.456
d3-EPO- Sca1 HIGH (H)	260	26.098			25.004	25.784			23.055					23.805		26.739	24.992			26.431			25.764	25.493			23.233					23.726		27.119	25.453	28.5		26.566			25.604	25.369			23.002
d3-EPO- Sca1 HIGH (H)	261								25.328									28.509	29.962								26.706									28.323									24.732
d3-EPO- Sca1 HIGH (H)	262															25.361	28.529										29.542							25.547											30.372
d3-EPO- Sca1 HIGH (H)	263	26.351		25.903		27.432	28.76			28.523								26.181		26.246		25.726		27.111	29.432			28.557
d3-EPO- Sca1 HIGH (H)	264				24.763			23.102	22.966								23.782	28.027	25.546				24.219			21.973	22.606								23.372		25.86				24.674			22.518	22.986
d3-EPO- Sca1 HIGH (H)	265	24.634			24.948	25.537		24.04	25.121					25.533			25.135		28.45	24.294			24.489	25.991		24.193	24.735					24.49			24.074		28.532	24.035			24.758	25.425		24.403	24.96
d3-EPO- Sca1 HIGH (H)	266			22.976	24.655			23.979	25.075					24.187			21.523					23.088	24.457			24.22	25.233					23.765			21.435	28.041				22.755	24.339			24.741	25.34
d3-EPO- Sca1 HIGH (H)	267	24.227			23.678	24.951		22.235	22.058					23.857		24.983	20.492			23.522			23.595	25.741		22.121	22.213					23.633		24.441	20.312			23.917			23.799	25.448		22.164	22.051
d3-EPO- Sca1 HIGH (H)	268	25.445		23.344				23.23	22.158					26.954		25.971	22.45		23.799	24.773	29.838	23.396				23.195	22.698					26.542		26.158	22.954		23.787	24.856	29.368	23.198				23.681	22.772
d3-EPO- Sca1 HIGH (H)	269	25.417		23.316				23.202	22.13					26.926		25.943	22.422		23.771	24.745	29.81	23.368				23.167	22.67					26.514		26.13	22.926		23.759	24.828	29.34	23.17				23.653	22.744
d3-EPO- Sca1 HIGH (H)	270	25.371							28.455					25.349		27.153	24.447		24.733	24.612												25.024		27.026	23.961		25.482	25.202							28.148
d3-EPO- Sca1 HIGH (H)	271			24.183	24.747			23.204	24.963								21.122					24.139	24.362			23.046	26.009								21.225					24.912	24.899			23.624	25.287
d3-EPO- Sca1 HIGH (H)	272				29.282				22.794														29.019				22.965														29.4				22.605
d3-EPO- Sca1 HIGH (H)	273													23.862	23.736												28.499					23.823	23.314												28.271
d3-EPO- Sca1 HIGH (H)	274	28.306														23.196				28.658		24.506	25.231		24.237	24.724								23.354				28.741		24.816	25.31		24.617	22.808
d3-EPO- Sca1 HIGH (H)	275	26.365		25.917		27.446	28.774			28.537								26.195		26.26		25.74		27.125	29.446			28.571
d3-EPO- Sca1 HIGH (H)	276		29.298						24.774					24.34			24.57		28.274		30.788		26.181			25.198	24.433					24.163					28.522		29.564		26.182			25.149	24.563
d3-EPO- Sca1 HIGH (H)	277		29.371		25.39	25.167		25.123						24.276		26.18	24.148						25.492	25.365		24.974	24.38					24.18		26.647	24.413				29.551		25.412			25.61	24.193
d3-EPO- Sca1 HIGH (H)	278	26.803			23.446				24.17					25.236			21.941			26.984	28.303		22.499			24.612	24.173					25.548		26.856	24.444			26.517	28.433		22.774	25.347		24.606	25.298
d3-EPO- Sca1 HIGH (H)	279																24.15										23.542					25.348			24.26										23.334
d3-EPO- Sca1 HIGH (H)	280	26.65			24.348				23.48															24.365		25.115	23.797					24.661						26.242			24.172	24.426			23.595
d3-EPO- Sca1 HIGH (H)	281	26.758	29.75											24.839						26.581	29.848		24.321	24.525			24.668					24.468			24.364				29.38		24.514	24.365		24.844	24.422
d3-EPO- Sca1 HIGH (H)	282		29.258						23.54					23.173		26.71	24.348				29.259		25.722	25.254			23.846					24.631		26.983	23.787				30.216		25.37	25.461		23.849	24.477
d3-EPO- Sca1 HIGH (H)	283					26.778		22.485	23.44					24.22			21.966						24.66	26.364		23.646	22.93					25.92			21.999						24.253			22.625	23.159
d3-EPO- Sca1 HIGH (H)	284	26.817			23.46				24.184					25.25			21.955			26.998	28.317		22.513			24.626	24.187					25.562		26.87	24.458			26.531	28.447		22.788	25.361		24.62	25.312
d3-EPO- Sca1 HIGH (H)	285							24.791								26.518	22.77						23.797			24.589	23.399							26.57	22.632			26.418						24.735	23.54
d3-EPO- Sca1 HIGH (H)	286				24.221	26.391			23.26					25.369		27.126							25.4	26.361		24.18	25.893					25.11			22.396						25.13				24.911
d3-EPO- Sca1 HIGH (H)	287	26.747	29.448		24.63	26.562			25.187								23.512				28.617		24.279	26.978			24.95					25.224		27.213	22.85				28.223					25.32	24.172
d3-EPO- Sca1 HIGH (H)	288	26.559	28.646		23.318	25.639		24.759	25.16					24.795			24.168			26.917	29.324						22.72					24.951		26.574	25.25				29.35		23.56	25.6		24.75
d3-EPO- Sca1 HIGH (H)	289				24.179	25.246		25.62	22.738					23.547			22.671			27.233			24.83				25.211					25.214			22.21			27.153			23.969	25.578		25.753	22.48
d3-EPO- Sca1 HIGH (H)	290	27.863		25.785				23.811					22.942		26.908	21.277			27.438	28.925		25.916				22.684					24.956		26.78	21.816			27.516						23.897	22.88
d3-EPO- Sca1 HIGH (H)	291				25.61			24.728									24.275										23.494					23.882			24.24		28.793				25.838				24.591
d3-EPO- Sca1 HIGH (H)	292				25.783			23.383	23.625								22.631									23.767	23.599					24.948			22.732		28.414				25.461			24.81	23.454
d3-EPO- Sca1 HIGH (H)	293				25.645				24.752					25.49		27.885	23.986		29.189		30.69					24.166	25.344							27.452	22.524		29.569		29.753		25.39				24.332
d3-EPO- Sca1 HIGH (H)	294		27.877		25.799				23.825					22.956		26.922	21.291			27.452	28.939		25.93				22.698					24.97		26.794	21.83			27.53						23.911	22.894
d3-EPO- Sca1 HIGH (H)	295	25.596	28.77		23.66	25.9		24.985	23.237					22.432			22.751		29.192	25.648	28.54		23.69				24.167					22.593			22.721		29.832		27.249			25.66		23.12	23.364
d3-EPO- Sca1 HIGH (H)	296				23.484			25.699									23.249			26.578			23.939				25.49					24.975						26.577							23.745
d3-EPO- Sca1 HIGH (H)	297																24.11						24.682	24.653		24.939	24.391														24.637	24.893			22.892
d3-EPO- Sca1 HIGH (H)	298		28.32														23.21				28.672		24.52	25.245		24.251	24.738								23.368				28.755		24.83	25.324		24.631	22.822
d3-EPO- Sca1 HIGH (H)	299			23.073					21.946			25.244						27.251			27.714	23.036	21.91				21.349			25.539					20.982	27.474			27.425	23.11	21.814				21.318			25.297
d3-EPO- Sca1 HIGH (H)	300		27.123		22.787	26.062			22.276					25.913			20.799							26.045		23.438	23.625					22.774			20.915	27.328			27.173		22.912			23.047	23.408
d3-EPO- Sca1 EXTEREM HIGH (H')	301		26.304	25.475					21.106			27.141		22.785	25.488			27.034	24.635			25.436		25.758		22.638				26.81		22.832	25.822			26.424	24.508		26.463	25.698		25.834		22.598	21.192			27.061
d3-EPO- Sca1 EXTEREM HIGH (H')	302			23.47	22.069			22.205	21.727			27.324		21.943	25.844	24.774	22.094	26.108			27.506	23.739	22.69			22.365	21.421			27.458		21.872	25.195	24.664		25.41			27.386	23.478					21.867			26.652
d3-EPO- Sca1 EXTEREM HIGH (H')	303			23.177					22.05			25.348						27.355			27.818	23.14	22.014				21.453			25.643					21.086	27.578			27.529	23.214	21.918				21.422			25.401
d3-EPO- Sca1 EXTEREM HIGH (H')	304	24.698	27.399	22.942					22.986					22.724	27.269		21.085	27.567		24.365		23.169	23.06	25.949		22.893						21.997	27.577	25.123		27.096		24.576	27.611	23.232	22.811	25.875		21.442	23.431
d3-EPO- Sca1 EXTEREM HIGH (H')	305	24.563	27.171	24.823			26.786		21.004					22.511			22.383	27.741		24.537	27.616	25.763			26.458		20.875					22.924			21.17	27.287		24.756	27.479	24.569			26.645
d3-EPO- Sca1 EXTEREM HIGH (H')	306	24.538		26.325	22			22.871						21.013	25.736		22.628	29.169	25.93	24.575		26.959		26.152	26.856		22.557						25.593			28.758	26.012			25.806	22.804	25.987	26.698	22.759	23.485
d3-EPO- Sca1 EXTEREM HIGH (H')	307	24.632			22.127													27.147		24.745			22.869			22.785	22.69					23.621				25.65		24.785			21.965			22.861	22.753
d3-EPO- Sca1 EXTEREM HIGH (H')	308			21.068	21.747	25.829		23.109	21.46					21.692	26.307			27.284				21.465		26.048		23.138						21.658	26.988		20.822	27.464		24.457		21.477	21.745				21.995
d3-EPO- Sca1 EXTEREM HIGH (H')	309	24.375		24.875	21.75	25.884	24.485	21.745	23.562								21.462	28.15				26.464			24.236	21.717	23.423					22.619		25.516	22.067	28.314		24.419		25.627	22.307	25.785	24.469
d3-EPO- Sca1 EXTEREM HIGH (H')	310		27.246			26.856		21.062	22.258					22.458	29.047		23.258	27.324			26.996		22.728	27.124		21.721						22.734	29.083	25.452	22.917	27.218					22.81			21.527	22.413
d3-EPO- Sca1 EXTEREM HIGH (H')	311		26.67	23.295	21.821					26.312						25.146		27.872	25.653		26.567	23.464	21.704			21.79		26.66				22.844			22.259					23.522				21.755
d3-EPO- Sca1 EXTEREM HIGH (H')	312				23.228			22.653	21.938					23.078		24.536	21.333				27.17		22.89			22.584	22.025					22.831		24.524	22.152				27.288		22.784				21.938
d3-EPO- Sca1 EXTEREM HIGH (H')	313				22.616				22.438							25.369	23.159															22.606		25.236	20.998						22.36				22.738
d3-EPO- Sca1 EXTEREM HIGH (H')	314							22.569	22.451					21.834			21.185						22.753			22.726						21.614			22.352	29.073					22.563				22.751
d3-EPO- Sca1 EXTEREM HIGH (H')	315			21.803	21.263			23.31	21.507							25.932	20.341	25.552				21.781	21.734				21.494					22.843				25.387				27.127				22.812	21.741
d3-EPO- Sca1 EXTEREM HIGH (H')	316	24.624						23.161	22.534			26.38			24.143	26.56	21.158	27.877		24.433	28.226					22.986	23.092			26.893		22.545	25.102	26.64	22.252	28.204	26.987	24.563	28.129						22.534			26.896
d3-EPO- Sca1 EXTEREM HIGH (H')	317			22.496		25.928	24.754			27.811				22.663				26.917				22.494	21.72	26.072	24.685	21.784	21.87					22.174				26.827				23.655	21.846		23.745	21.944	21.439	27.842
d3-EPO- Sca1 EXTEREM HIGH (H')	318		26.324	22.527				22.626	23.583			25.957		21.856			22.384	27.813			26.632	22.184	21.063	25.767		22.651	22.889			26.867		23.551			21.183	27.595			26.526	23.104	21.233	25.896		22.54	23.14			26.63
d3-EPO- Sca1 EXTEREM HIGH (H')	319	24.176	26.213	22.713	22.797			22.087		24.933	27.184	26.934			24.348	25.043	21.158	25.046		24.512	26.074	23.028					23.059	25.259	27.901	25.323		22.949	24.372	25.133	22.15	25.249		24.572		22.869	22.257			21.686	23.801	25.396	26.897	25.354
d3-EPO- Sca1 EXTEREM HIGH (H')	320			26.304		25.804		21.555	22.303						27.119		22.199	26.618	25.166			26.156	22.008			21.91	22.105					23.639	26.821	24.602	22.187	23.705					22.391	26.254		21.874	21.658
d3-EPO- Sca1 EXTEREM HIGH (H')	321			21.458			25.235	22.563				25.892		22.438	24.292		21.159	26.089				22.483	23.536		25.442		21.553			25.348		21.617	24.254	24.963	21.234	25.83				24.707	23.728		25.365	22.634	21.377			24.996
d3-EPO- Sca1 EXTEREM HIGH (H')	322		26.379	23.811	22.785	25.879		22.676								24.676	20.36	26.566				23.578	22.897	25.369			22.302					23.285		24.783		25.802	25.257			23.418				22.426	22.147
d3-EPO- Sca1 EXTEREM HIGH (H')	323			25.273	22.253	25.651			22.55					22.843	26.482		22.127	26.435			26.339	26.075	22.01	25.875		23.019						22.385	27.836		21.223	27.971	25.271		26.648	25.353				22.448	23.37
d3-EPO- Sca1 EXTEREM HIGH (H')	324		27.227		22.891	26.166			22.38					26.017			20.903							26.149		23.542	23.729					22.878			21.019	27.432			27.277		23.016			23.151	23.512
d3-EPO- Sca1 EXTEREM HIGH (H')	325			25.077	22.121	26.545		23.71	23.542			26.931		23.011	25.278	26.473	26.228	26.824				25.413	21.965	25.742		24.074	23.968			26.6		22.843	25.612	26.351	24.651	26.214				24.782	21.847	26.565		23.742	23.758			26.851
d3-EPO- Sca1 EXTEREM HIGH (H')	326	22.968	25.64	23.26	20.612	25.061		20.794	22.075			27.114		21.706	25.634	23.389	20.809	25.898	27.742	22.744	25.124	23.529	20.628	24.749		20.91	22.264			27.248		21.716	24.985	23.805	20.748	25.2	27.592	22.699	25.498	23.268	20.521	25.454		20.666	21.982			26.442
d3-EPO- Sca1 EXTEREM HIGH (H')	327	24.995	25.759	22.967	22.076			22.308	21.949			25.138		24.241		24.552	22.717	27.145		24.835	26.235	22.93	21.759			22.154	22.227			25.433		23.718		24.925	22.913	27.368		24.791	25.924	23.004	21.849			22.026	21.991			25.191
d3-EPO- Sca1 EXTEREM HIGH (H')	328	24.138		22.732	21.163	26.761		21.646	21.278					22.762	27.059	25.659	21.985	27.357		24.228		22.959	21.037	25.795		21.596	21.455					22.486	27.367	26.245	21.97	26.886		24.022		23.022	21.255	26.045		21.419	21.438
d3-EPO- Sca1 EXTEREM HIGH (H')	329	24.077	26.992	24.613	22.625	26.946	26.166	22.162	21.376					22.985		24.415	24.207	27.531		24.141	27.733	25.553	22.502	26.014	25.874	22.217	21.309					22.362		24.602	24.545	27.077		24.772	27.236	24.359	22.39	26.669	26.591	21.74	21.462
d3-EPO- Sca1 EXTEREM HIGH (H')	330	24.947		26.115	21.989	24.528		22.808	22.058					22.918	25.526	25.598	22.003	28.959		24.678		26.749	21.793	23.909	26.007	22.852	22.462					23.115	25.383	25.703	22.74	28.548		24.965		25.596	21.612	24.178	26.024	22.485	22.128
d3-EPO- Sca1 EXTEREM HIGH (H')	331	23.849			21.658	24.348		21.696	22.122					22.274		24.852	23.063	26.937		24.318			21.459	24.135		21.41	22.043					22.228		24.541	22.431	25.44		24.299			21.515	24.145		21.178	21.915
d3-EPO- Sca1 EXTEREM HIGH (H')	332	24.341		20.858	21.595	25.434		20.031	21.031					22.134	26.097	25.095	24.436	27.074		24.216		21.255	21.466	25.787		19.788	21.33					22.335	26.778	24.614	24.661	27.254		24.41		21.267	21.179	25.575		19.702	21.245
d3-EPO- Sca1 EXTEREM HIGH (H')	333	24.535		24.665	23.32	27.179	24.221	22.055	20.68					22.09		25.369	22.787	27.94		25.013		26.254	23.329	27.729	24.03	22.584	20.94					22.267		25.281	22.764	28.104		24.849		25.417	22.958	27.86	24.556	22.178	21.01
d3-EPO- Sca1 EXTEREM HIGH (H')	334	24.032			20.76	25.676		20.688	20.306					22.386	28.837	25.013	19.607	27.114	25.735	23.276			20.669	25.521		20.758	20.444					22.342	28.873	26.832	19.385	27.008	25.688	24.067			20.52	25.583		20.707	20.398
d3-EPO- Sca1 EXTEREM HIGH (H')	335	26.158	26.65	23.085	23.504	27.009		21.727	21.888	26.102				23.142		25.105	21.755	27.662	27.716	27.094	27.258	23.254	23.867	26.363		21.795	22.119	26.45				23.526		24.814	21.736		27.253	26.551	27.05	23.312	23.582	26.774		21.724	22.071
d3-EPO- Sca1 EXTEREM HIGH (H')	336	26.01		24.694	22.197		25.005	22.388	23.217					23.636		26.395	22.337	27.164		26.406		24.445	22.645		25.765	22.578	23.553					23.445		26.961	23.178	27.069		26.331		24.867	22.563		25.899	22.364	22.213
d3-EPO- Sca1 EXTEREM HIGH (H')	337				25.803			26.955						28.025			23.971						26.396			25.354						27.008			23.711						25.996			25.603
d3-EPO- Sca1 EXTEREM HIGH (H')	338	24.845			24.03	26.901		22.169	22.725					23.454		25.331	20.734			24.653			24.239	26.931		21.982	22.51					22.996		25.307	20.869	28.863		24.647			24.284	25.712		21.826	22.06
d3-EPO- Sca1 EXTEREM HIGH (H')	339	22.235		21.593	19.907	26.385		20.267	19.702					21.502		22.987	21.019	25.342	26.608	22.657		21.571	20.317	25.81		20.523	19.969					22.587		23.391	21.292	25.177	26.221	22.835		26.917	19.986	26.423		20.218	18.586
d3-EPO- Sca1 EXTEREM HIGH (H')	340	23.998	28.067		21.7			20.872	21.499			26.17		22.47	23.933	24.217	22.616	27.667		25.204	27.837		21.772			21.246	21.746			26.683		21.632	24.892	25.008	25.038	27.994		24.168	28.04		21.297			22	21.403			26.686
d3-EPO- Sca1 EXTEREM HIGH (H')	341	24.593	28.588	22.286	21.379	24.787	24.255	21.922	21.005	27.601				22.006		24.446	21.522	26.707		24.863		22.284	21.399	24.754	24.411	22.122	21.121					22.419		34.963	22.143	26.617		24.414	27.884	23.445	21.824	23.604	23.734	21.925	22.675	27.632
d3-EPO- Sca1 EXTEREM HIGH (H')	342	23.697	24.898	22.317	20.844	28.039		21.427	21.363			25.747		21.477		23.244	21.501	27.603		23.521	25.438	21.974	20.625	27.861		21.363	21.247			26.657		22.399		23.818	19.809	27.385	25.829	20.314	25.119	22.894	22.843	27.912		19.435	18.293			26.42
d3-EPO- Sca1 EXTEREM HIGH (H')	343	22.103		22.503	20.418	23.698		19.906	20.625	24.723	26.974	26.724		21.342	24.138	22.82	21.473	24.836		21.983		22.818	20.4	23.095		19.381	21.533	25.049	27.691	25.113		21.506	24.162	23.543	22.682	25.039		21.861		22.659	20.295	23.683		19.581	21.702	25.186	26.687	25.144
d3-EPO- Sca1 EXTEREM HIGH (H')	344	23.971	28.902	26.094	19.823	25.479		20.524	20.533					21.149	26.909	23.235	22.31	26.408	25.387	24.464	28.815	25.946	20.401	25.037		20.939	22.237					23.59	26.611	22.429	22.675	23.495	25.807	24.368				22.613		21.404	20.741
d3-EPO- Sca1 EXTEREM HIGH (H')	345	23.488	27.478	21.248	21.292	25.896	25.734	22.612	23.676			25.682		22.611	24.082	24.673	23.011	25.879		23.706	27.407	22.273	21.679	25.295	25.636	20.8	21.279			25.138		22.86	24.044	23.023	20.857	25.62		23.902	27.939	24.497	22.645	23.171	25.748	20.683	21.262			24.786
d3-EPO- Sca1 EXTEREM HIGH (H')	346	23.853	26.201	23.601	21.651	26.348		21.918	22.062					22.683		24.098	21.68	26.356		23.769	26.4	23.368	21.781	25.776		21.712	22.213					22.864		23.407	21.77	25.592		23.093	26.614	23.208	22.121	25.135		20.989	21.886
d3-EPO- Sca1 EXTEREM HIGH (H')	347	25.033		25.063	22.997	26.447		21.558	21.064					22.638	26.272	23.205	21.267	26.225	24.977	25.144		25.865	23.099	26.734		21.07	21.297					22.704	27.626	22.85	21.369	26.047	24.44	24.569		25.143	22.788	26.014		20.94	20.906
d3-EPO- Sca1 EXTEREM HIGH (H')	348								26.24								24.11																	26.814	24.322										26.316
d3-EPO- Sca1 EXTEREM HIGH (H')	349	23.928			20.656	25.572		20.584	20.202					22.282	28.733	24.909	19.503	27.01	25.631	23.172			20.565	25.417		20.654	20.34					22.238	28.769	26.728	19.281	26.904	25.584	23.963			20.416	25.479		20.603	20.294
d3-EPO- Sca1 EXTEREM HIGH (H')	350			21.699	21.159			23.206	21.403							25.828	20.237	25.448				21.677	21.63				21.39					22.739				25.283				27.023				22.708	21.637
d6-EPO- Sca1 LOW (L)	351		11.845		24.132	25.404		23.266	21.486	24.522			24.819	25.468		22.986	23.634		23.664	24.896	12.324			25.832		24.605	22.127	24.564			24.584	25.765				27.502	23.807	24.804	12.155		24.172			23.191	22.904	23.926			24.927
d6-EPO- Sca1 LOW (L)	352	23.369	17.467		23.873	25.847		24.272		24.769			23.342	24.6		22.657	23.19		22.725	23.269	18.525		23.785	25.785		24.146	22.792	24.678			23.741	25.923			22.405		22.194	23.452	19.574		23.78				22.775	25.089			23.266
d6-EPO- Sca1 LOW (L)	353	23.689	18.294					23.8		23.748			22.521	24.825			24.085		22.831	23.698	19.502		23.325	25.124		24.044	22.713	23.373			22.259	28.327			24.305		22.944	23.785	18.502		23.279	25.015		24.12	22.331	23.562			22.252
d6-EPO- Sca1 LOW (L)	354	23.745	20.451		24.739				21.466	24.987			23.469	24.498			24.259		23.208	23.658	18.47		24.742	25.412			21.725	24.916			24.083			22.594	24.13		23.356	23.692	19.289	28.239		25.124			21.72	24.186			24.068
d6-EPO- Sca1 LOW (L)	355		13.653		24.674				24.065								21.463	27.464		25.372	13.653		24.82	24.785			22.268					23.883		22.603				25.369	13.563		24.572	24.785			21.783
d6-EPO- Sca1 LOW (L)	356		18.256			24.748			22.264	24.035			22.753	24.18		21.544	23.72		23.689		18.334		24.764			22.825		24.844			23.143	24.817		21.367			23.703		18.452		24.861			22.735	21.845	24.117			22.837
d6-EPO- Sca1 LOW (L)	357		20.411		24.847	24.927		23.91	22.751	24.788			23.012			21.29	23.683		23.452	24.635	19.069		24.333			22.995		25.131			23.446	22.512		21.405			23.166	24.511			24.017	25.039			21.318	24.86			23.125
d6-EPO- Sca1 LOW (L)	358			26.258	24.757			23.321	23.398	22.891			22.267	24.012		20.864	24.294		24.477	24.584	19.325		24.238		28.519		21.96	23.304			22.563	23.808		21.226	24.299		24.569		19.391					23.615	22.817	23.618			22.472
d6-EPO- Sca1 LOW (L)	359					25.698		25.143		23.434			22.253			21.031					24.098		25.425					23.472			22.153	24.319		21.152	24.986				23.313		25.602	25.785		24.395		23.474			22.111
d6-EPO- Sca1 LOW (L)	360				24.404	25.953		24.027		21.996			22.527	24.795		20.835	23.173		22.616	24.613	19.542			25.875		23.948	22.856	21.956			22.116			21.266	23.134		22.785	24.785	19.337		24.694				22.842	21.914			22.552
d6-EPO- Sca1 LOW (L)	361					25.745				22.626			21.304			21.124			21.43								23.066	23.316			21.385			21.37			20.989					25.365			21.871	22.878			21.427
d6-EPO- Sca1 LOW (L)	362		19.337		24.365	24.008				23.186			22.174			23.072	24.152		22.917		18.02			24.984		23.442	21.754	23.449			21.934	23.945		21.997	23.045		22.819		18.343		24.807	25.049		23.988	23.355	23.287			21.767
d6-EPO- Sca1 LOW (L)	363	23.848	16.443		21.735	23.561	26.397	24.246	19.213	24.846			24.407	22.74		23.12	21.496		23.13	23.588	16.56		22.439	23.03		22.53	19.009	25.7			24.228	22.042		22.766	21.457		22.361	23.283	15.885		22.493			23.249	19.579	25.244			23.599
d6-EPO- Sca1 LOW (L)	364				24.807	25.487		24.314	22.813	22.773		28.608	22.432			23.142	25.352						24.86	25.493			22.746	22.609			22.352	24.791		22.794	24.097				18.633		24.805			24.289	22.038	22.838			22.162
d6-EPO- Sca1 LOW (L)	365		16.586		24.286	24.754		24.536	23.01	23.706			22.75			23.125	24.355		23.369		16.552						22.113	24.007			22.825	24.751		22.754	24.314	27.386			16.529		24.088			24.287	23.804	23.619			22.918
d6-EPO- Sca1 LOW (L)	366	24.548	16.653		24.831	24.986		24.219	22.985	23.727			21.748	24.988		23.935	24.078		23.452	24.741	16.66						22.834	23.767			21.899	24.71		22.865	22.415				16.685		24.785	24.785			21.951	23.988			21.972
d6-EPO- Sca1 LOW (L)	367		19.267		23.804	24.741			21.821				25.547				24.22		23.367	24.585	19.321		23.986	24.512			22.701				26.125	24.632		22.986	23.573			24.458				24.986			21.796				25.011
d6-EPO- Sca1 LOW (L)	368	24.694	19.236		24.065	25.153			20.722				24.895	23.483		21.761	23.138		23.325	24.785	19.281		22.607			24.172	22.928				24.692	23.317		22.036	23.197		23.156		20.625					23.561	21.332				24.776
d6-EPO- Sca1 LOW (L)	369				24.98	25.841		24.055	22.656	27.312			26.118	24.377		22.987	23.188				17.719		23.788	25.371				26.881			26.867			23.125	23.384		23.14		17		24.766	25.365		20.781	21.073	26.561			25.99
d6-EPO- Sca1 LOW (L)	370		15.992		24.972			24.403	22.01				25.574	22.577		23.123	22.938	27.664	22.365	24.452	16.067		23.563	25.398			21.986				25.228	24.059		22.832	22.865			24.292	16.063		25.264	25.436		24.634	22.356				25.01
d6-EPO- Sca1 LOW (L)	371	24.504			24.731			25.278	22.006				25.421	23.507			22.637				19.755		24.803	25.206		25.125	21.845				24.864						23.0123	24.743	18.806			25.365							25.181
d6-EPO- Sca1 LOW (L)	372								22.848	26.06			25.922	24.236		23.145	23.365		22.597		17.938		23.291			24.48		25.221			26.828	24.59			23.268		22.282				23.838			24.615	23.06	24.795			25.954
d6-EPO- Sca1 LOW (L)	373	24.436	20.203		23.795	25.458		23.071	22.123	23.416			22.122	22.801		24.853	22.358		23.126	24.326			23.925	25.654			23.031	24.038			22.378	22.711		24.542			23.019		20.389		23.827			24.136	20.962	23.561			22.32
d6-EPO- Sca1 LOW (L)	374		19.904						20.988	23.065			22.788	24.44			23.986		21.918							24.495		22.895			23.077	24.152					22.077		19.43					24.777	21.838	23.362			22.557
d6-EPO- Sca1 LOW (L)	375	25.499	27.635		20.74	24.759	24.416	20.841	22.841	26.588		25.782		22.715		24.306	23.37	27.921	27.653	26.012	27.547		20.821	25.507	23.896	21.251	22.196	26.487		25.971		22.419		24.644	22.853	27.855	27.214	25.704	26.935		20.871	25.229	23.822	21.233	22.628	26.561		25.684
d6-EPO- Sca1 LOW (L)	376	24.862	18.594		23.014	23.543		27.513	20.344	24.646			23.186	23.087		22.374	21.689	28.569	22.583	25.459	18.425		23.428	23.535		27.339	20.491	24.555			23.585	22.959		22.871	21.77	28.42	22.052	25.628	18.419		23.63	23.655		27.315	20.384	24.966			23.11
d6-EPO- Sca1 LOW (L)	377	23.352	16.819		23.65	24.093		22.694	20.632	23.625			22.365	21.341		21.765	20.503		22.689	23.769	16.886		23.172	23.593		22.369	20.844	23.25			22.103	21.242		21.99	20.441		22.802	23.36	16.665		23.517	23.87		22.169	20.754	23.439			22.096
d6-EPO- Sca1 LOW (L)	378	25.36	20.074		24.906	23.871		23.425	21.211	24.864			23.313	25.601		22.335	20.882		22.325	25.284	19.943		24.412	24.215		23.423	21.288	24.793			23.927	25.228		22.808	20.651		22.421	24.656	19.801		24.625	24.273		23.052	21.386	24.063			23.912
d6-EPO- Sca1 LOW (L)	379		23.519		26.361	28.372		24.698	24.676					25.324		24.277	25.201		27.17		23.182		27.373	27.176		25.673	24.68					24.87		24.374	25.679		26.743		23.609		26.371	27.583		25.597	25.032
d6-EPO- Sca1 LOW (L)	380	24.319	16.362		24.294	24.849		22.348	21.391	23.912			22.597	23.462		21.42	22.095	28.291	22.046	24.524	16.16		24.402	24.849		22.393	21.789	24.721			22.987	23.599		21.243	21.419	27.656	22.03	24.675	16.099		24.558	24.7		22.367	21.654	23.994			22.681
d6-EPO- Sca1 LOW (L)	381	23.141	15.618	27.26	22.849	25.435		21.972	21.379	24.665		27.24	22.856	22.29		21.166	22.049	27.968	22.093	23.666	15.733	27.12	22.815	24.905		22.029	21.923	25.008		27.254	23.29	22.152		21.281	22.584	28.035	22.098	23.865	15.544	27.721	22.506	25.247		22.138	21.928	24.737			22.969
d6-EPO- Sca1 LOW (L)	382		12.745		27.838	22.797				22.768			22.111	23.179	25.829	20.74	23.306	27.266	23.13	23.651	13.119		27.983	26.101		22.625	21.391	23.181			22.407	23.954	25.644	21.102	23.352	27.354	23.296	23.654	13.07		27.792	25.178		23.729	21.444	23.495			22.316
d6-EPO- Sca1 LOW (L)	383	23.535	13.69		23.024	23.957		22.557	20.91	23.311			22.097	23.046		20.907	22.58	27.711	22.119	23.428	13.783		23.073	23.829		22.613	21.282	23.349	26.526		21.997	23.162		21.028	22.57	27.937	22.107	23.118	13.55		22.814	24.2		22.842	21.228	23.351	26.414		21.955
d6-EPO- Sca1 LOW (L)	384	23.476	16.673		22.53	23.257	26.652	22.21	19.922	21.873			22.371	22.173	27.227	20.711	21.019		21.314	23.212	16.756		22.541	22.861	26.27	22.056	20.539	21.833			21.96	22.136		21.142	21.263	27.657	21.147	23.02	16.745		22.324	23.282	26.411	22.084	20.613	21.791			22.396
d6-EPO- Sca1 LOW (L)	385	23.07	14.329	28.235	23.697	20.313		21.379	19.517	22.503			21.148	22.624	24.003	21	23.4		21.274	25.639	15.011		23.64	22.856		21.553	20.63	23.193			21.229	22.921	23.895	21.246	24.607		20.833	25.236	14.704		23.849	22.949		21.987	20.638	22.755			21.271
d6-EPO- Sca1 LOW (L)	386	22.815	16.037	26.792	28.74	22.302	25.185	23.885		23.063			22.018	21.721		21.563	21.933	29.288	22.761	28.212	16.386	26.123	28.174	25.919		23.402	21.417	23.326			21.778	24.324		21.873	22.34	30.669	22.663	28.088	16.298	26.184		26.069		23.261	21.08	23.164			21.611
d6-EPO- Sca1 LOW (L)	387	24.769	14.283			26.166	27.754	24.529	21.331	24.723			24.251		25.162	20.429	23.323		24.267	24.64	13.866			26.7		24.946	22.78	25.577	26.254		24.072	28.293	25.228	20.345	24.83		24.177	24.655	14.344			25.769		26.06	22.187	25.121	26.609		23.443
d6-EPO- Sca1 LOW (L)	388	22.535	16.268		23.388	25.269		23.1	20.247	22.65			22.276	21.928	25.67	21.439	20.923	29.359	22.643	22.637	16.493		23.954	24.118		23.206	20.847	22.486			22.196	21.977	25.125	21.938	21.566	29.012	22.861	22.94	16.008		24.262	25.634		22.843	21.294	22.715			22.006
d6-EPO- Sca1 LOW (L)	389	27.019	16.569		24.8	24.349		25.712	20.615	23.583			22.594	22.881	26.05	22.015	23.342		22.614	26.871	16.397		24.793	24.271		24.2	20.621	23.884			22.669	22.486	25.323	21.925	23.705		22.391	27.971	16.313		24.483	24.238		24.94	20.439	23.496			22.762
d6-EPO- Sca1 LOW (L)	390	25.403	14.527		22.802	23.891		22.662	20.391	23.604			21.592	22.463		20.608	22.656	26.55	22.1	25.174	14.526		22.668	24.208		23.149	20.817	23.644			21.743	22.318		21.1	22.958	26.577	21.927	25.186	14.466		22.69	24.317		22.904	20.815	23.865			21.816
d6-EPO- Sca1 LOW (L)	391		18.175		25.735	26.01		26.129	22.019				25.391		26.767	24.458			24.191		18.239		26.038	27.181		27.256	22.698				25.969	30.554	26.707	25.231			24.289		18.152		26.155	26.966		26.434	22.837				24.855
d6-EPO- Sca1 LOW (L)	392		19.735		26.487	27.179			23.598				24.739	25.547		27.137	24.584		25.555		19.862		26.708	26.821			23.902				24.536	25.502		27.22	24.19		25.811		19.805		26.848	27.117		28.865	24.217				24.62
d6-EPO- Sca1 LOW (L)	393		20.58		30.709	26.599		26.099	24.131				25.962	25.758		26.192	24.425		25.781		21.886			26.7			22.163				26.711	26.283			23.874	27.342	26.267		21.826					26.986	23.435				25.834
d6-EPO- Sca1 LOW (L)	394		19.095		27.546		27.693	24.58	23.872				25.418	24.414		24.284	23.907	29.266	25.479		19.366		27.851		27.076	24.944	24.4				25.072	24.881		23.639	24.352	28.068	25.613		18.871		27.24			24.624	23.939				24.854
d6-EPO- Sca1 LOW (L)	395	25.869	18.261		22.795	25.217		23.731	21.725	27.239		27.856	25.265	22.914		22.234	22.525	29.188	23.286	26.994	18.358		23.171	25.089		23.543	21.896	26.758		27.392	24.708	23.237		22.567	22.997		23.267	25.536	18.246		22.988	24.952		24.048	21.757	26.438		27.1	25.025
d6-EPO- Sca1 LOW (L)	396	23.563	17.894		23.317	25.315		25.334	22.172	25.937	26.463		25.766	24.931		22.98	23.028		22.485	23.49	18.008		23.628	25.271		25.932	22.301	25.098	26.547		26.672	24.106		22.989	23.037		22.17	23.228	17.918		23.727	25.263		25.701	21.835	24.672			25.798
d6-EPO- Sca1 LOW (L)	397		15.41		24.651	22.971		23.042	20.869	23.293			21.966	22.87		20.922	23.581	29.498	23.014		15.241		25.013	22.93		23.124	21.153	23.915			22.222	23.103		21.054	23.259		22.907		15.174		25.181	23.007		23.242	20.862	23.438			22.164
d6-EPO- Sca1 LOW (L)	398	27.13	15.575		24.108	23.386		25.241	20.953	22.942			22.632	25.387	25.692	22.772	22.468		21.806	26.629	15.697	28.23	24.841	23.889		25.474	21.207	22.772			22.921	25.255	25.538	22.743	22.387		21.965	27.958	15.479		24.683	24.151		25.766	21.067	23.239			22.401
d6-EPO- Sca1 LOW (L)	399	24.986	18.718		23.138	23.667		27.637	20.468	24.77			23.31	23.211		22.498	21.813	28.693	22.707	25.583	18.549		23.552	23.659		27.463	20.615	24.679			23.709	23.083		22.995	21.894	28.544	22.176	25.752	18.543		23.754	23.779		27.439	20.508	25.09			23.234
d6-EPO- Sca1 LOW (L)	400	25.279	14.403		22.678	23.767		22.538	20.267	23.48			21.468	22.339		20.484	22.532	26.426	21.976	25.05	14.402		22.544	24.084		23.025	20.693	23.52			21.619	22.194		20.976	22.834	26.453	21.803	25.062	14.342		22.566	24.193		22.78	20.691	23.741			21.692
d6-EPO- Sca1 MID (M)	401	25.256	19.47					25.24	23.48					24.375			23.986		22.384	25.326	19.563					25.125	23.594					24.325			24.165		22.198	25.36	19.482
d6-EPO- Sca1 MID (M)	402	25.485	19.385		24.223	25.54			22.324	24.181			22.973	24.958		22.742	24.17		25.836	25.542	19.894		24.753	25.365			22.168	24.452			22.685	24.785		22.785	24.229		25.774	25.455	19.685						23.79	24.264			22.654
d6-EPO- Sca1 MID (M)	403					24.958		24.742	23.17	26.202			27.452		27.753	25.452			22.168					25.123			23.229	26.341			27.865		27.698	25.015			22.79							24.574		26.037			27.631
d6-EPO- Sca1 MID (M)	404		18.563					24.934	23.631	27.057				24.922		22.627	24.331		23.236				25.745			24.55	22.889	27.407						22.719	24.24		23.125		18.478		25.956			24.785	23.59	27.526
d6-EPO- Sca1 MID (M)	405	24.785			24.222				22.296				25.171	24.454		25.871	24.583		22.957		19.674		24.196	26.254		24.986	22.412				25.39	23.399		25.947	24.42		22.875	24.88	19.69		24.138	26.416		25.326	22.365	28.766			25.144
d6-EPO- Sca1 MID (M)	406				23.875				22.439				25.756	23.329		23.235	23.135		25.039		19.364		23.76	25.13			22.032				25.694	24.92		23.69	23.24		25.326		19.669			25.365			21.998				25.757
d6-EPO- Sca1 MID (M)	407	25.474	19.295		24.898				22.584				25.367	23.015		23.912	22.349	28.104	26.166	24.986	19.531			25.124		24.637	23.384	26.791			25.18	23.125		23.865	22.4	28.135	26.464				24.258	25.18		24.273	21.756	26.84			25.812
d6-EPO- Sca1 MID (M)	408	24.142	19.83		23.763	27.009		22.685	21.231				26.905	22.785		22.463	23.9		22.657		18.44		24.613	27.073		22.75	21.225				26.69	22.863		22.452	23.88		22.537	24.493	18.113		23.761	26.002							26.093
d6-EPO- Sca1 MID (M)	409	25.575	20.837		24.612	23.891		24.16		24.554			24.967	24.785		22.809	23.19		22.563	25.365	18.15		24.716	23.997			21.94	24.337			24.722	24.785		22.528	23.11		22.597					23.585		24.147	20.729	24.103			24.379
d6-EPO- Sca1 MID (M)	410					22.435		24.856	21.854	25.048			22.36	23.151		20.69	23.352	27.258	21.522	24.767	20.682			22.36		24.152		25.438			22.357	23.37		20.905	23.412	27.419	21.483	24.875	19.745		24.822	22.405		24.635	21.882	25.274			21.919
d6-EPO- Sca1 MID (M)	411	25.485	17.542		23.218	22.978		25.18	21.885	23.877			22.895	23.321		21.13	22.94	25.542	22.917		17.563		23.913	23.417		24.896	22.381	23.613			23.474	23.27		20.868	23.023		23.012	25.471	17.414		23.82	23.202			22.487	23.526			22.87
d6-EPO- Sca1 MID (M)	412	25.489			26.355	26.006		24.563		25.52			23.883	24.98		22.735		25.452	23.48				25.733	24.644		24.87		25.323			23.567	24.857		22.795	25.125		23.456	25.563				24.849				25.953			24.14
d6-EPO- Sca1 MID (M)	413				24.787	23.955				24.277			22.467	24.658		21.21			23.305				24.832	23.481				23.765			22.879	24.724		21.607			23.123					23.742				23.823			22.196
d6-EPO- Sca1 MID (M)	414	25.639	20.124					23.253	23.543				23.897	24.563		23.214	22.942	25.762	23.346		19.98		24.785	25.131		23.491	23.299				24.255	24.672		23.156	23.157		23.369	25.589	20.125		24.822	24.852			23.36				24.002
d6-EPO- Sca1 MID (M)	415		19.875		24.91					24.303			24.451	23.647		22.63	24.348		22.944	24.745	19.531		23.741				21.487	24.583			23.771	23.973		22.472	24.277		23.2	24.516	20.61		24.628				21.694	23.651			23.585
d6-EPO- Sca1 MID (M)	416		17.865		22.171	26.23		24.763	22.461	24.571			22.913	23.365		22.38	23.563		23.21		17.752		22.325	25.986		24.631	22.31	24.836			22.863	23.325		22.604	23.65		23.321		17.569		22.35					24.709			23.114
d6-EPO- Sca1 MID (M)	417	24.56	17.73		22.749	25.321				23.569			24.316	24.195		23.563	23.365		21.896	24.563			22.414	25.215		24.523	23.324	23.782			24.572	24.542		23.637	23.182		21.875				22.186			24.654	23.382	23.67			24.286
d6-EPO- Sca1 MID (M)	418				23.698					25.501			24.782	22.785		22.92	22.325		23.563		18.519		23.768	24.733	28.398		23.425	25.106			23.985	22.785		23.012	22.264		23.697		18.569		23.773	24.365			21.96	25.925			23.722
d6-EPO- Sca1 MID (M)	419		18.569		23.352	22.988		23.437	22.85	26.489			25.185	22.685		21.571	22.592		21.66	24.377						23.96	22.48	26.848			25.118	22.87		21.491	23.615	28.89	21.899	24.57	18.54		23.198	23.365		23.758	22.757				24.511
d6-EPO- Sca1 MID (M)	420		19.248		25.255	24.574			21.27	23.365			22.067			24.986	24.124		21.613		19.231		25.326	24.653			21.976	23.704			22.36			25.051	23.098		21.468		19.13			24.563			21.529	23.675			21.722
d6-EPO- Sca1 MID (M)	421		18.423			23.658		24.785						23.563		20.826	22.356		23.354	25.157	17.951		23.69	23.488			22.229					23.43		20.787	22.486		23.388	25.154	18.513		23.256	23.542		24.959	21.789
d6-EPO- Sca1 MID (M)	422		19.548	25.626		24.754		24.563	23.213	22.402			21.995	23.519		22.563	24.125				19.584	26.214	23.326	24.569			23.443	22.061			21.469	23.586		22.421	24.187				19.628		23.216	24.653		24.656		22.262			21.257
d6-EPO- Sca1 MID (M)	423	23.563	19.344			27.586			23.53					24.456		22.723	24.37		23.245	23.489	19.356		25.945	27.412			22.634					24.719		22.785	24.997		23.28	23.562	19.35		25.785
d6-EPO- Sca1 MID (M)	424	25.695	18.569			25.263		23.658	21.143					24.653		21.395	22.786		21.354	25.569	19.196		24.653	25.635		23.637	21.78					24.32		21.475	22.382		21.179	25.623	18.362		24.561			23.365	21.752
d6-EPO- Sca1 MID (M)	425		12.202		26.99	26.217		22.769	23.171						25.119	23.055	23.778		26.816		12.107		27.859	26.933		22.255	23.614						24.972	23.007	22.922		26.232		12.199		26.556	25.362		22.409	23.179
d6-EPO- Sca1 MID (M)	426	24.362	15.578		23.013	24.174		24.366	21.113	24.057			22.85	22.748		21.235	22.308		22.26	23.75	15.318		22.753	23.952		23.751	20.878	23.423			22.562	23.098		20.675	22.21		22.074	24.281	15.394		22.854	23.869		23.92	20.919	24.14			22.531
d6-EPO- Sca1 MID (M)	427		23.128			27.65			23.412	26.078			28.302	26.569		24.992	28.234		25.712		23.03			27.113		27.019	24.583	26.217			28.802	26.513		24.893			25.65		22.823		29.264	26.769		27.497	23.842	25.913			28.49
d6-EPO- Sca1 MID (M)	428	26.451			21.12	24.5		24.508	20.492	26.933				22.074		22.505	22.096	25.588	23.4	25.76			20.979	24.647		25.506	20.373	27.283	26.485			21.814		22.597	22.129	25.92	23.345	26.191			21.097	24.32		25.667	20.476	27.402
d6-EPO- Sca1 MID (M)	429	26.159	20.529		25.329	25.309		24.572	23.411				25.048	24.713		25.749	24.289		28.016	25.685	20.619		25.179	24.997		24.212	23.456				25.267	25.503		25.825	24.46		28.579	26.916	20.464		25.023	25.106		24.777	23.883	28.642			25.021
d6-EPO- Sca1 MID (M)	430	24.557	27.596		24.825	26.982		23.984	24.528				25.633	25.682			22.556		27.608	25.481			25.444	27.101		24.184	25.545				25.571	25.799		28.217	22.337	27.958	27.027	25.151	27.631		25.536	26.881		25.151	25.141				25.634
d6-EPO- Sca1 MID (M)	431		17.728		23.776	26.293		25.151	23.806				25.244	22.755		25.193	22.984		24.915	24.762	18.526		24.735	26.136			21.983	26.667			25.057	22.795			22.877		25.915	24.623	18.506		24.427			23.994	23.475	26.716			25.689
d6-EPO- Sca1 MID (M)	432		21.147			27.113			23.322		26.621		26.782	25.394	27.577	27.598			26.042		21.317			27.177			24.487				26.567	25.244	27.548	27.552			26.34		21.2			26.106			24.776		26.34		25.97
d6-EPO- Sca1 MID (M)	433	24.878	22.654		22.469	23.995		24.762	21.468	23.43			24.844	23.663		22.687	21.219		22.533	25.091	22.611		22.776	24.101		24.02	21.635	24.213			24.599	23.672		22.406	21.288	29.075	22.413	24.594	22.59		22.639	23.689		24.051	21.352	23.979			24.256
d6-EPO- Sca1 MID (M)	434	22.192	18.52		21.149	22.539		21.55	18.734	24.924			22.237	20.472		20.568	18.292	25.535	21.154	22.359	18.548		20.918	22.464		21.781	19.983	25.314			22.234	20.425		20.783	18.404	25.864	21.261	22.129	18.32		20.915	22.509		21.6	19.915	25.15			21.796
d6-EPO- Sca1 MID (M)	435	25.835	16.485		21.833	23.082		22.105	19.489	23.753			22.772	21.616		21.008	23.157	25.564	21.398	25.838	16.449		21.665	23.521		22.546	20.272	23.489			23.351	21.803		20.746	23.142	25.76	21.359	25.973	16.517		21.781	23.306		22.317	20.157	23.402			22.747
d6-EPO- Sca1 MID (M)	436	23.559	22.028		21.957	26.11		23.849	20.048	25.396			23.76	22.182	25.94	22.613	20.615	27.878	23.252	23.454	21.685		21.563	24.748		23.687	20.674	25.199			23.444	22.009	25.46	22.673	20.805	27.027	23.056	23.629	21.744		21.696	24.953		23.466	20.5	25.829			24.017
d6-EPO- Sca1 MID (M)	437	25.858	17.381		22.662	24.059		24.116	20.931	24.153			22.344	21.564	27.3	21.088	22.539		22.784	25.49	17.551		23.413	23.585		24.498	20.79	23.641			22.756	21.376	27.121	21.485	22.308	28.796	22.699	25.055	17.847		22.594	23.846		23.908	20.948	23.699			22.073
d6-EPO- Sca1 MID (M)	438	24.802	19.161		22.86	25.197		23.915	21.262				23.774	22.769	24.34	22.624	22.76	29.018	23.181	25.265	19.061		22.739	24.788		24.15	21.308		27.257		24.132	22.401	24.608	22.742	22.452		22.999	24.759	19.035		22.688	24.408		23.658	21.133				23.879
d6-EPO- Sca1 MID (M)	439	25.199	19.08		22.861	24.274		23.39	21.42	24.179			24.328	22.953	23.095	22.865	23.614	29.477	22.457	24.708	19.124		23.126	24.357		23.054	21.35	24.459			23.648	22.79	22.891	22.712	23.266	29.015	22.639	24.725	18.93		22.749	24.621		24.124	21.241	23.527			23.462
d6-EPO- Sca1 MID (M)	440	25.339	16.812		24.49	24.509		24.688	21.109	24.447			22.79	23.524	24.776	22.508	22.359		22.82	25.634	16.719		24.776	24.052		24.248	20.962	24.712			22.74	23.556	24.664	22.35	22.254		23.076	25.955	16.653		24.742	24.586		25.48	20.921	24.585			22.991
d6-EPO- Sca1 MID (M)	441	25.482	14.438		26.497			23.614	21.58	23.445			24.193	24.315		22.258	24.288		24.472	25.615	14.24		27.219			24.14	21.804	23.658			24.449	24.185		22.482	24.503		24.573	25.246	14.222		26.476			23.677	21.515	23.546			24.163
d6-EPO- Sca1 MID (M)	442	25.076	13.188	26.217	26.47	27.792		25.062	21.011	25.377			24.659	26.908		21.292	22.351		23.83	25.492	13.202	25.535	27.415	27.829		24.627	21.658	25.982			23.862	26.999		21.766	22.179		23.214	25.405	13.229	26.11	27.13	27.109		24.861	21.7	25.801			23.599
d6-EPO- Sca1 MID (M)	443	23.444	23.861		21.753	24.18		20.264	20.995	26.365			25.062	21.207		24.294	18.946	26.383	24.436	23.353	23.769		21.531	24.03		19.445	20.291	26.724			24.995	21.021		21.868	18.432	25.718	23.573	22.76	23.013		21.208	22.142		19.911	19.131				24.388
d6-EPO- Sca1 MID (M)	444	25.934	16.119		24.193	23.36		23.454	20.268	25.261			21.944	22.021		21.449	22.779	26.054	21.489	25.442	15.919		23.918	23.278		22.695	20.38	24.58			22.237	22.013		20.53	22.591	26.753	21.344	26.688	15.76		23.912	22.707		22.755	19.598	23.551			21.599
d6-EPO- Sca1 MID (M)	445		13.068			25.389		24.265	23.164						24.663	25.679	21.373		28.333		13.165			26.004		24.29	22.981						24.71	24.929	21.657				13.13			26.261		23.192	22.672
d6-EPO- Sca1 MID (M)	446	22.368	15.782		22.84	21.96		21.2	19.768	22.278			21.872	21.875		20.704	19.737	26.936	21.23	22.665	16.543		22.727	21.763		20.765	19.533	21.937			21.346	21.733		20.665	19.507	26.527	21.055	22.538	16.029		22.37	21.703		21.097	19.875	22.138			21.134
d6-EPO- Sca1 MID (M)	447	25.1	13.212		26.494	27.816		25.086	21.035	25.401			24.683	26.932		21.316	22.375		23.854	25.516	13.226		27.439	27.853		24.651	21.682	26.006			23.886	27.023		21.79	22.203		23.238	25.429	13.253		27.154	27.133		24.885	21.724	25.825			23.623
d6-EPO- Sca1 MID (M)	448	24.854	22.63		22.445	23.971		24.738	21.444	23.406			24.82	23.639		22.663	21.195		22.509	25.067	22.587		22.752	24.077		23.996	21.611	24.189			24.575	23.648		22.382	21.264	29.051	22.389	24.57	22.566		22.615	23.665		24.027	21.328	23.955			24.232
d6-EPO- Sca1 MID (M)	449	23.683	22.152		22.081	26.234		23.973	20.172	25.52			23.884	22.306	26.064	22.737	20.739	28.002	23.376	23.578	21.809		21.687	24.872		23.811	20.798	25.323			23.568	22.133	25.584	22.797	20.929	27.151	23.18	23.753	21.868		21.82	25.077		23.59	20.624	25.953			24.141
d6-EPO- Sca1 MID (M)	450	22.244	15.658		22.716	21.836		21.076	19.644	22.154			21.748	21.751		20.58	19.613	26.812	21.106	22.541	16.419		22.603	21.639		20.641	19.409	21.813					24.586	24.805	21.533				13.006			26.137		23.068	22.548
d6-EPO- Sca1 HIGH (H)	451	23.932	27.466		21.673	21.359		21.962	19.896	24.485		25.452		21.37	25.738	22.4	20.593	24.958	26.512	24.292	27.859		21.386	23.409		22.394	19.661	24.521		25.365		21.376	25.18	22.365	20.11	25.213	26.591	24.699			21.686	23.277		22.328	19.659	24.929		25.47
d6-EPO- Sca1 HIGH (H)	452	24.797				26.919		21.167	20.711					21.904		23.849	21.622	27.018	23.967	25.208			20.512	24.725		21.305	21.062					21.626		24.074	21.477	27.593	24.073	25.494			20.633	24.923		21.552	21.201
d6-EPO- Sca1 HIGH (H)	453	24.563	26.959		21.416	25.127		23.375	22.125	25.588				21.365	25.203	23.243	21.448	26.037	26.686	24.428			20.81	24.937		23.369	22.044	25.614				21.365	25.211	23.374	21.296	26.194	26.904	24.458	26.248		21.579	24.554		23.354	22.254	26.045
d6-EPO- Sca1 HIGH (H)	454	22.53	27.49		19.778	24.408	26.321	22.064	19.759	25.056				21.041	24.3	23.634	21.399	25.887		22.467	26.822		19.803	24.305	26.566	22.341	19.891	24.588				21.034	24.066	23.639	21.468	26.207	29.101	22.471	27.01		19.766	24.527	26.671	22.746	19.942	24.735
d6-EPO- Sca1 HIGH (H)	455	25.195		24.563	20.514	24.166		22.526	19.093				25.059	21.626	24.304	22.563	23.364	28.142	22.896			24.43	20.482	24.249		21.993	19.426				25.152	21.565	24.428	22.654	23.061	27.986	22.776	25.235		24.458	20.37	24.259		22.452	19.328				25.142
d6-EPO- Sca1 HIGH (H)	456	26.214		26.163	21.92	25.597	25.344	20.64	21.777			25.456	25.093	22.551		17.693	21.106		24.563			25.7	21.858	25.297	25.478	21.245	22.045			25.365	25.705	22.202		18.23	21.398		24.323	26.179		26.14	21.883	25.323	25.824	21.367	21.871			25.353	25.545
d6-EPO- Sca1 HIGH (H)	457	25.326			21.093	26.804	26.92	20.866	21.809	27.397	27.609		25.428	22.467		22.222	18.68	27.43	24.596	25.538			20.959	26.035		20.79	22.382	27.195	27.558		25.569	22.532		22.28	18.874	27.563	24.69	25.38			20.869	26.168	27.52	20.431	22.343	27.518			25.539
d6-EPO- Sca1 HIGH (H)	458	25.37		24.152	21.84	23.836		20.911	22.41	25.157				22.622	27.025	22.369	19.133		20.943			24.211	21.97	24.121		21.125	22.713	24.689				22.471	26.928	22.28	19.159		20.624	25.32		24.236	21.949	24.303		21.147	23.043	24.836
d6-EPO- Sca1 HIGH (H)	459	22.985	25.82	24.368	19.576	24.108	23.911	20.229	19.69	27.019				21.106		24.88	21.722	26.767		22.544	26.43	24.344	19.755	24.095	23.225	20.581	20.125	27.882				21.057		25.217	21.595	26.117		23.102	26.479	24.649	19.769	24.828	23.343	20.792	20.097	27.036	28.006
d6-EPO- Sca1 HIGH (H)	460	24.569			19.912	23.538	26.395	21.127	20.83	26.689				20.42		22.653	20.894	27.136	23.869	24.226		26.541	19.897	23.183	26.251	21.258	21.565	26.588			26.452	21.365		22.118	20.791	27.362	23.876	24.912		26.775	19.746	23.17		21.128	21.459	26.662			26.346
d6-EPO- Sca1 HIGH (H)	461	25.422			19.622	23.214	25.317	21.318	19.65		28.137			21.435		23.984	24.759	29.349	25.025	25.631			19.498	23.275	25.125	21.354	18.917					21.393		23.682	24.446		24.833	25.242			19.409	21.458		21.369	18.398
d6-EPO- Sca1 HIGH (H)	462	24.84			19.305	23.874		21.677	20.937					23.2		22.1	17.577	25.849	23.653	25.111			19.205	23.605		21.616	20.757				25.365	22.871		24.576	17.188		23.51	25.037			19.158	23.422		21.546	20.363				25.488
d6-EPO- Sca1 HIGH (H)	463	24.974		26.72	20.958	25.641		19.158	20.815	26.495				22.461	25.609	22.362	22.101	25.58		24.79		26.727	20.956	25.408		18.19	20.972	26.601			27.065	22.482	25.829	22.452	22.009			24.905		26.759	20.812	25.141		17.572	20.928	26.07
d6-EPO- Sca1 HIGH (H)	464			26.795	21.219	23.261		21.817	21.482	22.712				21.039		22.365	21.693	26.201		25.896		26.754	21.191	23.394		21.454	21.573	22.197	28.175		25.96	20.965		22.194	21.529			25.94		26.587	21.02	23.194		21.738	21.545	22.239	28.418		26.051
d6-EPO- Sca1 HIGH (H)	465	25.425		27.227	19.864	23.122	25.293	21.403	22.133	26.389	25.983		23.876	21.826	25.219	21.53	21.999	25.131	22.913			27.24	19.96	23.369	25.56	21.268	22.057	26.131	25.751		26.159	22.365	24.982	21.331	22.076	27.253	22.92	25.385		26.85	19.881	22.986	25.9	21.034	22.266	27.046	25.582		25.975
d6-EPO- Sca1 HIGH (H)	466	24.61	26.365		20.967	23.994		22.427	19.151	25.54				21.294	25.529	22.889	20.124	24.888	24.384	24.544	26.381		20.952	23.967		22.207	19.235	26.84				21.532	25.997	23.178	19.986	24.93	24.835	23.745			21.018	24.075		22.404	19.235	26.051
d6-EPO- Sca1 HIGH (H)	467	23.746	27.532		20.787	23.807		20.993		25.242				22.805		23.046	22.196	25.303	26.69	24.941	27.353		20.894	23.793		20.965		25.372				22.852		23.235	22.096	25.366	25.766	24.7	27.23		20.754	24.005		20.993		26.093
d6-EPO- Sca1 HIGH (H)	468	22.867			20.904	24.059		23.434	20.051					22.053	25.781	23.229	21.896	24.996	27.382	22.622			20.879	24.266		22.832	20.678					22.365	26.594	23.36	21.677	25.269	26.925	23.34			20.895	24.322		23.254	20.193
d6-EPO- Sca1 HIGH (H)	469				19.588	22.434		22.258	20.802	26.875						23.863	22.152	25.156	21.741	24.563			19.414	22.617		22.228	20.875	26.657						24.088	22.369	25.221	21.702	24.879			19.406	22.793		22.321	20.709	26.866
d6-EPO- Sca1 HIGH (H)	470	24.901	25.147		20.33	23.874		22.961	20.493	26.621	26.314			22.575	24.476	22.698	22.214	26.878	26.766	25.312	25.635		20.297	24.3		22.699	20.219	27.056	26.896			22.452	24.369	22.624	22.156	26.408	26.331	25.598			20.371	24.397		20.86		26.3	26.153
d6-EPO- Sca1 HIGH (H)	471	22.634	25.452		21.773	26.166			19.869	25.747				22.759	27.069	24.365	22.563	27.142	27.134	22.571	25.98		21.781	25.691			19.782	25.599				22.112	26.558	24.26	22.763	27.717	27.395	22.575			21.68	26.158			19.892	25.682
d6-EPO- Sca1 HIGH (H)	472	24.829		24.365	20.676	24.499		22.021	21.053					22.4		24.32	23.542	28.745	24.289	24.429		24.369	20.756	25.281		22.154	21.152					22.653		24.658	23.584	26.331	24.563	24.542		24.363	20.831	25.438		22.201
d6-EPO- Sca1 HIGH (H)	473	23.342	25.986		19.236				20.984	26.526				23.785		24.636	22.698	26.891		23.26	25.821		19.121	23.841			21.162	26.522				23.205		23.628	22.726	26.241		23.221			19.196	23.631			21.214	26.131
d6-EPO- Sca1 HIGH (H)	474	22.947			20.867		24.241	20.969		26.878				23.542	27.347	23.617	21.434	28.045	23.778	23.551			21.006	26.351	24.325	21.013		26.162				23.536	27.503	23.514	21.475	27.979	23.697	23.093			20.936	26.513	24.256	20.986		26.368
d6-EPO- Sca1 HIGH (H)	475	22.246	20.136	29.821	22.039	21.242	22.514	22.998	24.918					20.478		23.846	19.827	25.504	27.081	22.378	20.124		22.394	27.292	22.742	23.414	24.26					19.821		24.219	19.978	25.276	27.143	22.448	20.127		22.058	23.16		23.489	24.683
d6-EPO- Sca1 HIGH (H)	476	21.677	19.805		19.793	23.376		19.68	19.748	24.384			23.285	20.38	25.714	22.716	19.138	25.6	24.611	21.594	20.324		19.3	24.457	25.47	18.545	20.151	24.42			23.208	20.32	25.156	22.995	19.273	25.844	24.764	22.118	19.829		18.07	21.269	25.105	18.689	20.429	24.828			23.908
d6-EPO- Sca1 HIGH (H)	477	23.716	25.744	24.635	21.293	25.01		21.295	20.464	25.164			24.804	23.74		26.975	18.86	25.023	23.068	24.092	26.16	24.958	20.687	25.82		21.53	21.649	25.721			24.701	23.735		26.038	19.567	25.984	23.342	24.464	26.165	25.232	21.456	24.437		21.641	21.672	25.708			24.5
d6-EPO- Sca1 HIGH (H)	478	23.782	25.553		21.01	22.916		22.341	21.2		27.192			22.099	25.179	25.393	21.656	27.721	24.804	23.755	25.597		21.232	23.095		21.9	21.66					22.322	25.187	25.423	21.945		24.418	23.947	25.553		21.142	23.153		21.594	21.131		27.362
d6-EPO- Sca1 HIGH (H)	479	22.459	24.155		20.391	24.049	24.728	20.763	18.99	25.487				21.089	24.28	22.34	20.774	25.265	26.386	22.237	24.398		20.359	24.132	24.036	20.687	19.323	25.513	26.821			20.965	24.404	22.938	20.671	25.303	26.465	22.282	24.105		20.247	24.142	24.534	20.328	19.225	25.944	26.265
d6-EPO- Sca1 HIGH (H)	480	24.175			21.797	25.48		21.674	21.674	27.88				21.602	27.001	24.669	24.639	26.003	27.482	24.381	29.588		21.735	25.18		21.813	21.942	27.825				21.541	26.904	24.727	24.326	26.831	27.536	24.244			21.76	25.206		21.439	21.768	27.281
d6-EPO- Sca1 HIGH (H)	481	24.382	26.956	26.236	20.97	26.687	24.502	22.233	21.706		27.509	26.41		22.527	25.15	23.229	21.981	26.344	26.56	24.591	26.766	26.329	20.836	25.918	24.052	22.268	22.279		27.458	26.63		22.178	25.427	23.36	21.889	26.085	26.778	24.202	26.895	26.879	20.746	26.051	23.816	22.239	22.24			26.203
d6-EPO- Sca1 HIGH (H)	482	23.8	24.549	24.953	21.717	23.719		23.234	22.307					22.443		23.698	21.573	26.596		24.071	24.812	24.535	21.847	24.004		23.299	22.61					22.508		23.21	21.409	26.993		23.997	24.969	24.714	21.826	24.186		23.123	22.94
d6-EPO- Sca1 HIGH (H)	483	23.934			21.318	23.256		23.95	21.874					22.598		23.901	20.271	26.194	29.662	23.75			21.471	23.227		23.432	22.295					22.447		23.767	20.365	26.11	29.434	23.865			21.458	23.506		23.135	22.071
d6-EPO- Sca1 HIGH (H)	484	25.726			19.789	23.421		23.345	20.727	26.394		25.59		22.058		23.617	23.244	26.607		25.383			19.774	23.066		23.987	21.462	26.5		25.903		22.027		24.249	22.941	27.307		25.888			19.623	23.053		23.568	21.356	25.969		25.878
d6-EPO- Sca1 HIGH (H)	485	21.393	20.989		19.499	23.097		19.055	19.547	22.611			22.817	20.396		20.91	17.457	24.834	20.817	21.215	20.675		19.375	23.158		18.087	18.814	22.096			22.796	20.25		18.765	17.068	25.089	20.498	21.039	20.242		19.286	21.341		17.469	18.295	22.138			22.203
d6-EPO- Sca1 HIGH (H)	486	22.833	26.347		19.182	23.757		20.148	20.834					21.411	25.585	22.979	19.013	25.539	28.749	23.36	26.641		19.082	23.488		19.789	20.654					21.369	25.805	22.272	19.039	25.358	28.148	22.884	27.084		19.035	23.305		19.674	20.26
d6-EPO- Sca1 HIGH (H)	487	23.837	27.342	24.248	20.835	25.524		21.201	20.712	26.288			25.097	23.176		27.77	18.697	25.913	23.743	23.481	27.73	24.672	20.833	25.291		21.114	20.869	26.03			25.269	22.847		27.274	18.772	26.07	23.75	24.056		24.153	20.689	25.024		20.956	20.825	26.945			25.003
d6-EPO- Sca1 HIGH (H)	488	24.809	25.887		21.096	23.144		22.324	21.379		28.037			22.437	25.195	25.016	21.879	27.381	24.899	24.481	25.561		21.068	23.277		22.104	21.47		28.075			22.458	24.958	25.759	21.956	26.584	24.707	24.372	25.291		20.897	23.077		22.301	21.442		28.318
d6-EPO- Sca1 HIGH (H)	489	21.95	27.634		19.741	23.005	25.743	20.89	22.03	25.439			27.138	21.015	25.505	22.954	20.986	24.107		22.253	27.746		19.837	23.252	25.062	20.862	21.954	26.739			27.414	20.941	25.973	22.841	21.278	24.373		22.093	27.688		19.758	22.869	25.46	20.89	22.163	25.95			27.195
d6-EPO- Sca1 HIGH (H)	490	23.032	26.811		20.844	23.877		20.097	20.813	25.141				21.802		22.842	18.56	25.725	24.258	22.939	26.309		20.829	23.85		20.029	20.927	25.271				21.647		22.499	18.754	25.735	24.709	23.042	26.632		20.895	23.958		20.071	20.863	25.992
d6-EPO- Sca1 HIGH (H)	491	22.964	24.2		20.664	23.69		20.567	20.302	26.774				21.27		23.97	19.077	25.456	26.564	22.623	24.644		20.771	23.676		20.41	20.385	26.556				21.508		23.668	19.018	24.429	25.64	22.911	23.94		20.631	23.888		20.496	20.328	26.765
d6-EPO- Sca1 HIGH (H)	492	23.153		24.967	20.781	23.942	25.044	22.858	21.219	26.52				21.218		24.227	20.856	26.077	27.256	23.431		24.928	20.756	24.149	24.978	22.596	21.14	26.955				21.184	28.407	24.562	20.848	25.84	26.799	23.636		25.378	20.772	24.205	24.985	22.714	21.268	26.199
d6-EPO- Sca1 HIGH (H)	493	22.302			19.465	22.317		19.447	19.207	25.646	25.883			20.817	25.757	21.006	19.887	25.007	21.615	22.22			19.291	22.5		19.457	19.439	25.498	25.651			20.844	26.57	21.297	19.887	24.251	21.576	22.181			19.283	22.676		19.32	19.482	25.581	25.482
d6-EPO- Sca1 HIGH (H)	494	21.907	24.066		20.207	23.757	24.243	20.446	19.053	26.425	26.214			20.667	24.452	22.48	20.747	24.764	26.64	22.511	24.187		20.174	24.183	24.267	20.47	19.092	26.421	26.939			20.931	24.345	22.445	20.644	24.806	26.205	22.053	24.072		20.248	24.28	24.727	20.352	19.176	26.03	26.053
d6-EPO- Sca1 HIGH (H)	495	24.506			21.65	26.049		21.445	21.167	26.777				21.377	27.045	24.589	24.085	25.179	27.008	24.44			21.658	25.574		21.729	21.726	26.061				21.237	26.534	24.75	24.807	25.242	27.269	23.641			21.557	26.041		21.403	21.918	26.267
d6-EPO- Sca1 HIGH (H)	496	23.642			20.553	24.382	26.039	21.801	21.078	26.129		25.668		21.796		22.875	21.885	24.872		24.837			20.633	25.164	25.915	22.145	21.413	26.865		25.552		21.673		23.164	21.825	25.145		24.596			20.708	25.321	26.423	22.001	21.18	26.246		25.201
d6-EPO- Sca1 HIGH (H)	497	22.763						20.201	19.409	27.296				20.828	27.323	23.032	20.994	25.032		22.518	25.477		18.998	23.724		21.089	20.236	27.094				20.713	27.479	23.221	20.801	25.097		23.236	25.151		19.073	23.514		20.583	20.289	27.417
d6-EPO- Sca1 HIGH (H)	498						24.498	22.103	21.712		25.121	26.037		22.412	25.597	23.215	22.093	26.754	26.812	24.459	26.231	25.879	20.883	26.234	23.92	22.06	21.792		25.236	26.148		22.029	25.611	23.346	21.907	26.284	26.127	24.775	26.671	25.896	20.813	26.396	23.642	22.177	21.936			26.143
d6-EPO- Sca1 HIGH (H)	499	23.414	27.14		21.729	24.363	26.222	22.185	22.53		26.164	25.004	25.959	22.725	24.535	24.622	21.173	26.736		23.592	27.122		22.005	24.922	25.684	22.242	22.754		26.217	25.123	25.947	22.597	23.996	23.614	21.318	26.469		23.482	27.108		21.676	25.357	25.552	22.164	22.692		26.734	25.874	25.013
d6-EPO- Sca1 HIGH (H)	500	23.534	23.456						20.896	26.791		25.274		20.338	24.326	23.603	21.425	25.19	24.898	23.291	23.43	22.82	18.816	23.742		21.179	20.921	26.413	26.757	25.512		20.575	24.143	23.5	21.36	25.316	25.042	23.498	23.044	22.756	18.745	23.515		21.293	20.81	26.151		25.759
[truncated: 25 more columns]

## Sheet: GM-CSF+IL-3 treated (d1,d3,d6)
		There are 3 tech replicates/assay for each sample
		Technical Replicate 1																		Technical Replicate 2																		Technical Replicate 3
		Pu.1	Hba-a1	Egr2	ckit	TBP	CD11b	Runx1	Scl	EpoR	CEBPa	Gfi1	Eklf	cMyb	cJun	Fog1	Gata2	Fli1	Gata1	Pu.1	Hba-a1	Egr2	ckit	TBP	CD11b	Runx1	Scl	EpoR	CEBPa	Gfi1	Eklf	cMyb	cJun	Fog1	Gata2	Fli1	Gata1	sfpi1	Hba-a1	Egr2	ckit	TBP	CD11b	Runx1	Scl	EpoR	CEBPa	Gfi1	Eklf
d1-GM-CSF/LI-3- Sca1 LOW (L)	1				25.563	24.06		22.86	24.821					22.563			22.734		27.542	28.036			25.653	24.541		22.964	24.728					22.421			22.652		27.457				25.789	24.079		22.827	24.711
d1-GM-CSF/LI-3- Sca1 LOW (L)	2	26.475	22.279					25.871	25.365					23.654			22.567				22.508					25.756	25.685					23.354			22.458			26.481	22.969						25.602
d1-GM-CSF/LI-3- Sca1 LOW (L)	3	26.531	24.132		24.785	26.894			23.6				26.023	24.958		24.632	21.432		27.369		24.484		24.801				23.805				26.263	24.748		24.587	21.524		27.414	26.572	24.452		24.586	26.563			23.413
d1-GM-CSF/LI-3- Sca1 LOW (L)	4	25.875	25.618		24.346	25.741		26.542						24.413		25.452	23.389	27.472		25.865			24.164	25.975		26.3	26.478					24.521		25.795	23.051			25.901	25.077		24.724	25.865			26.524
d1-GM-CSF/LI-3- Sca1 LOW (L)	5	25.582			27.899	24.523			27.615					25.452			24.315	27.036	25.274	25.569			27.539	24.654			27.511					25.514			24.256		25.033	25.585				24.896
d1-GM-CSF/LI-3- Sca1 LOW (L)	6	26.416			23.153			25.5						25.542		26.706	22.693			26.455			23.625			25.452	27.569					25.365		26.165	22.236						23.582			25.653	27.658
d1-GM-CSF/LI-3- Sca1 LOW (L)	7	26.642			25.295	25.662		25.01	22.861				25.698	23.457			21.886		24.785	26.587			25.356	26.46		25.125	22.875				25.718	23.449			21.789		24.385	26.3			25.666			25.365	22.354
d1-GM-CSF/LI-3- Sca1 LOW (L)	8	24.356	19.357							25.566				23.116						24.392	19.365		26.542					25.756				23.423						24.548	19.293		26.141
d1-GM-CSF/LI-3- Sca1 LOW (L)	9		21.231			26.9		27.636	25.176					26.685		26.086	22.377				21.123			26.871		27.452	25.365				27.196	26.551		26.453	22.563				20.981										27.233
d1-GM-CSF/LI-3- Sca1 LOW (L)	10	26.133	26.354					26.358	29.289					23.545		25.798			25.254	25.912	26.542					25.379						23.587		25.674			25.369	25.985						26.063
d1-GM-CSF/LI-3- Sca1 LOW (L)	11								25.452					24.582			24.325		27.566				26.024			27.155	25.29					24.992			24.144		27.84				26.331			27.66	25.082
d1-GM-CSF/LI-3- Sca1 LOW (L)	12		25.698					25.71	24.399					26.063		26.251	24.757	26.98			25.548		25.745			25.348	24.235					26.122		25.861	24.796	27.41	28.096		25.462		26.071			25.401	24.759
d1-GM-CSF/LI-3- Sca1 LOW (L)	13	23.978			23.663	23.978		21.857	20.778	27.47				22.333		22.932	20.793	27.62	25.841	23.988			22.751	23.353		21.527	20.978	27.952				22.454		22.654	20.816	27.886	25.391	23.449	29.111		23.129	23.417		22.363	20.945
d1-GM-CSF/LI-3- Sca1 LOW (L)	14	27.36	23.971		25.732			26.371	25.636				29.397	26.281		25.279	24.295		27.496	27.569	23.888		25.519			26.11	25.444					26.551		24.801	24.319		27.33	27.178	24.074		25.757			26.506	25.028
d1-GM-CSF/LI-3- Sca1 LOW (L)	15	25.186	24.18	25.146	25.687	26.27		25.232	22.402							24.238	22.145	28.339		25.007	24.204	25.098	25.823	26.099		25.364	22.351							24.576	21.895	28.578		25.132	24.041	25.022	25.875	26.327		25.957	22.689
d1-GM-CSF/LI-3- Sca1 LOW (L)	16	23.285		24.534	25.791		26.601	23.189				27.345	24.379	21.85	22.326	22.051	27.485	25.522	26.423	23.103		24.748	26.172		26.979	22.829	27.866			26.538	24.167	22.123	21.778	22.769	27.907	25.51	25.74	23.599		24.968				22.738					23.555
d1-GM-CSF/LI-3- Sca1 LOW (L)	17	27.488			26.747	26.09		26.002	24.234				25.083	23.452		23.25	24.152	27.406	26.56	27.487						25.678	24.885					23.452		23.048	23.936						26.415	26.196			24.365				25.125
d1-GM-CSF/LI-3- Sca1 LOW (L)	18													24.53		22.785	21.12		25.698				24.411	24.443								24.194		22.757	21.159	27.555	25.634	28.329			24.992	24.73		29.63					27.706
d1-GM-CSF/LI-3- Sca1 LOW (L)	19				23.589	23.856		22.85	20.488	24.483			24.785	22.372		21.099	18.428	26.97					23.635	23.708		22.711	20.785				24.574	22.853		20.916	18.455		23.365	23.267			23.09	23.282		22.891	20.087	25.425			25.217
d1-GM-CSF/LI-3- Sca1 LOW (L)	20		25.265			24.614		24.62	23.62					24.099		26.174	20.645		27.443		24.9			24.855		24.251	23.834					24.034		25.516	20.548		27.442		24.929			24.915		24.519	23.998
d1-GM-CSF/LI-3- Sca1 LOW (L)	21	25.701	21.949		24.737	24.372		26.881	23.608					24.203		26.083	21.924		29.48	25.614	21.873		24.25	24.331		26.948	24.305					24.643		26.189	21.667			25.2	21.887		24.515	23.84		26.713	24.136
d1-GM-CSF/LI-3- Sca1 LOW (L)	22		21.132		26.784			26.374	24.133	25.221			27.4	25.596		24.951	22.628		28.842		20.93		26.591			26.175	23.896	25.45			27.404	25.444		24.356	22.635		28.844		20.958		26.45			26.214	24.465	25.65			27.268
d1-GM-CSF/LI-3- Sca1 LOW (L)	23	25.887	23.117					26.846	27.284				25.976	26.438		28.032	24.515			25.625	23.009					26.794	27.673				25.92	26.137			24.51		29.631	25.125	23.079					26.57	27.943				25.885
d1-GM-CSF/LI-3- Sca1 LOW (L)	24	23.216	27.861		23.803	24.911	25.707	23.119	25.107					24.877	28.493		23.364			23.115	28.374		24.441	25.223	26.297	22.757	25.122					24.892	28.419		23.475			23.588	27.029		24.054	24.909	25.904	23.18	25.2
d1-GM-CSF/LI-3- Sca1 LOW (L)	25	26.94	21.898		26.554				24.621					24.76		25.949	24.633		27.188	27.801	22.197		26.074				24.424					25.218		25.447	24.69		27.284	26.934	22.267		25.747				24.943
d1-GM-CSF/LI-3- Sca1 LOW (L)	26	27.682	25.602		27.663			25.917	26.169					24.612		25.89	22.549		28.642	27.621	25.977		27.503			25.696	25.698					24.437		26.359	22.883		28.873	27.513	25.387		27.498			25.727	25.697
d1-GM-CSF/LI-3- Sca1 LOW (L)	27	26.618	27.928		25.452	26.033		25.281	22.267	27.161			27.65	26.156		26.09	22.169	28.433	25.372		27.623		25.41	26.079		25.136	22.835				27.188	26.097		26.176	22.123		25.293	26.785	28.156		25.35	26.162		25.535	22.562	27.5			27.399
d1-GM-CSF/LI-3- Sca1 LOW (L)	28	26.248	18.253		26.339	25.713		24.256	22.616	25.588			26.674	24.33		23.505	22.019		24.683	25.884	18.299		26.407	26.012		24.145	22.891	25.963			26.915	23.936		23.215	22.139		24.868	26.543	18.232		26.961	26.284		24.972	23.312	25.899			26.724
d1-GM-CSF/LI-3- Sca1 LOW (L)	29		21.018			27.258		26.925	24.827				27.53	27.144		26.273	22.969		25.88		21.014			27.733		26.992	25.295				27.517	27.754		25.36	22.582		25.812		20.987			27.06			25.557				26.748
d1-GM-CSF/LI-3- Sca1 LOW (L)	30	26.918	27.053					26.142								27.176				26.481	27.215					26.237								27.381				26.422	27.002					26.368
d1-GM-CSF/LI-3- Sca1 LOW (L)	31				25.984			27.022	24.132					24.478			25.451		27.088				25.895			26.916	24.191					24.732			26.234		27.078				26.09			26.131	24.639
d1-GM-CSF/LI-3- Sca1 LOW (L)	32		24.858						26.365					27.165			25.457				25.426		25.862			27.462						26.713		26.099			27.214		25.508		25.724			27.047	26.32
d1-GM-CSF/LI-3- Sca1 LOW (L)	33	23.584			24.143	23.351		21.741	21.075	28.168				22.865			20.355	27.853	25.654	23.967			23.721	23.468		21.671	21.621	28.19				22.689		23.005	21.254	27.627	25.026	23.195			24.377	23.644		21.745	20.837	27.443
d1-GM-CSF/LI-3- Sca1 LOW (L)	34	27.725	24.64		24.901			27.137	24.023					26.436		25.494	24.042		27.427	27.035	24.127		25.435			27.082	24.478					26.713		25.79	24.037		27.331	27.511	24.281		25.557			27.351	24.456
d1-GM-CSF/LI-3- Sca1 LOW (L)	35	24.929	24.176	25.338	26.308	25.961		25.629	22.803				27.739			24.095	22.138	29.301		25.095	24.053	25.359	26.549	25.933		26.253	22.036							24.58	21.352	27.299		25.653	24.351	24.975	26.334	26.241		26.12	22.503				27.106
d1-GM-CSF/LI-3- Sca1 LOW (L)	36				27.206	26.061		28.349	25.867					26.531		25.399	23.8		29.512				27.626	26.303		27.84	25.325					26.532		25.627	24.067		29.736				27.147	26.22		28.199	25.656
d1-GM-CSF/LI-3- Sca1 LOW (L)	37				26.647	29.273		27.158						25.233		25.101	24.016						26.399	29.323		25.067						24.809		24.882	24.502						26.419	29.21		28.236
d1-GM-CSF/LI-3- Sca1 LOW (L)	38	27.393			25.175	27.006		26.266	23.03					24.283		23.883	21.027	28.499	25.626	27.321			25.693	26.829		25.823	22.739				26.898	24.73		23.772	20.759	27.708	25.673	27.912			25.73	26.999		25.738	23.085				27.288
d1-GM-CSF/LI-3- Sca1 LOW (L)	39	23.16			23.18	23.993		23.679	20.27	26.579			24.82	23.028		22.129	18.304	28.819	24.284	23.375			23.303	23.96		23.546	20.502	26.276			24.494	23.107		21.934	18.421	28.436	24.217	23.268			23.117	24.007		23.644	20.208	26.109			24.044
d1-GM-CSF/LI-3- Sca1 LOW (L)	40		25.959			25.127		24.825	23.691					24.341		25.982	20.578		27.85		25.526			24.999		24.21	24.447					23.925		25.281	20.436		27.333		25.27			24.935		24.105	24.438
d1-GM-CSF/LI-3- Sca1 LOW (L)	41	25.006	21.217		24.048	24.024		25.626	23.677					24.114		25.365	21.282			25.232	21.679		24.283	23.922		25.611	23.637					23.768		25.769	21.543			24.503	21.337		24.813	23.958		25.828	23.718
d1-GM-CSF/LI-3- Sca1 LOW (L)	42		20.771		25.721			28.598	24.499	25.893			26.114	25.745		25.079	22.291				20.754		26.291			28.959	23.842	25.415			26.466	25.364		24.743	22.073		27.309		20.729		26.112			28.651	24.041	25.628			26.018
d1-GM-CSF/LI-3- Sca1 LOW (L)	43	24.979	22.538										26.331	25.736			23.679			25.344	22.913					25.839	26.019				26.156	25.495			24.105			25.536	22.793					26.514	25.631				26.336
d1-GM-CSF/LI-3- Sca1 LOW (L)	44	23.232	26.296		24.954	24.72	25.811	23.599						25.425			24.012			23.073	27.369		24.56	24.226	25.487							24.8			22.615			23.602	26.655		24.359	23.738	25.404	23.251
d1-GM-CSF/LI-3- Sca1 LOW (L)	45	26.983	22.913		25.705				24.572					24.385		25.38	23.903		26.913	27.575	22.143		25.888				25.07					24.817		25.016	24.009		26.029	27.102	22.689		26.065				24.554
d1-GM-CSF/LI-3- Sca1 LOW (L)	46	25.317	24.9		26.737			25.945	24.525					23.924		26.082	21.174		28.308	25.441	25.234		26.529			26.391	24.467					23.042		25.684	21.531		28.244	24.999	25.536		27.401			26.422	24.268
d1-GM-CSF/LI-3- Sca1 LOW (L)	47	27.501	23.412		26.398	28.167			26.931					26.537		27.534	23.925			28.075	23.014		26.549	28.526			27.152					26.593		27.609	23.803			27.912	23.293		26.578	28.375			26.728
d1-GM-CSF/LI-3- Sca1 LOW (L)	48		22.629				26.695		26.07					26.526		26.678	25.86		27.57		22.494				26.292		26.425					26.781		26.504	25.575		28.358		22.775				26.467		27.108
d1-GM-CSF/LI-3- Sca1 LOW (L)	49		24.305			26.214			24.501							28.095	22.644	27.976			24.103			26.118			24.881					27.185		28.043	22.961	28.012			24.562			26.366			24.978
d1-GM-CSF/LI-3- Sca1 LOW (L)	50		23.581		26.268	26.308		26.114	24.96					24.616		23.76	23.158		27.2		23.926		26.217	26.783		26.889	24.168	27.154				24.627		23.101	22.945	29.076	27.725		23.439		25.898	26.2		26.381	24.28	27.062			28.178
d1-GM-CSF/LI-3- Sca1 MID (M)	51		27.221		24.921	25.162		24.774	24.542					25.124			24.465						24.802	24.807		24.558	24.514					24.979			24.202				27.87		24.883	25.454			24.578
d1-GM-CSF/LI-3- Sca1 MID (M)	52	24.536			26.044	24.008		22.221	24.689					24.458		24.524	22.28		27.278	24.383			26.541	23.173		24.961	24.68					24.879		24.369	23.147			24.635			26.307	23.866		24.845	24.684
d1-GM-CSF/LI-3- Sca1 MID (M)	53	25.498	27.752		26.886	23.906		22.29	24.458							25.543	22.28			25.678	27.841		26.75	22.939			24.494							25.197	22.587			26.102			26.642	22.965			24.425
d1-GM-CSF/LI-3- Sca1 MID (M)	54	25.754	28.128		25.805	27.311		22.298	24.635					23.872		24.788	21.547			25.191			25.604	27.778		25.356	24.296					24.014		24.401	21.573			25.913			25.672	27.257		25.151	24.26
d1-GM-CSF/LI-3- Sca1 MID (M)	55	26.118	27.77		24.256	24.435	27.432	24.288	22.548							26.45	22.412			26.012	27.785			24.71	26.83	24.523	23.096					24.265		26.392	22.475	27.572		25.896			24.187	24.636	27.166	24.325	22.712
d1-GM-CSF/LI-3- Sca1 MID (M)	56	22.608				23.181		23.531	22.744					27.17		26.16	23.457			25.67				23.437		23.248	22.386							25.767	23.542			25.646				22.21		23.936	22.216
d1-GM-CSF/LI-3- Sca1 MID (M)	57	23.302	26.1		25.013			26.78	23.131					25.482			23.456						24.785			26.142	22.988					25.368			23.365			22.838	26.536		24.846	27.701		26.899
d1-GM-CSF/LI-3- Sca1 MID (M)	58	24.307	25.536		25.235	24.26			23.455					24.736			22.191		28.238		25.741		25.215	24.317		25.216	23.118					24.9			22.269			24.187	25.646		25.214	24.209			22.74
d1-GM-CSF/LI-3- Sca1 MID (M)	59	23.62	26.682		24.36	24.46	23.371	23.569	24.682					24.525		24.547	22.754		27.132	25.518	27.442		24.75	24.485	23.122	23.687	24.599							24.547	22.243		26.897	25.574	26.658		24.772	24.574	23.053	25.582	24.484
d1-GM-CSF/LI-3- Sca1 MID (M)	60	24.528			23.62	25		24.423	22.952					25.929		25.123	21.166			24.635	27.442		23.493	25.15		24.61	23.52					25.25		25.587	21.167		27.127	24.653	27.47		23.766	24.86		24.764	23.382
d1-GM-CSF/LI-3- Sca1 MID (M)	61	24.793						21.763									22.15			25.213												24.923						25.079			24.73			21.819
d1-GM-CSF/LI-3- Sca1 MID (M)	62	26.604				25.48		24.685						23.556		24.419	24.251			26.332				25.369		24.71	25.56					23.486		24.45	24.417			26.583				25.423		24.578	25.61
d1-GM-CSF/LI-3- Sca1 MID (M)	63						26.026		22.409					22.553			22.116								25.524	23.412	22.871					22.482		25.812	22.325								25.683	23.047	22.265
d1-GM-CSF/LI-3- Sca1 MID (M)	64				24.741	25.152											22.329						24.715	24.797											23.144			26.716			24.652	25.444
d1-GM-CSF/LI-3- Sca1 MID (M)	65	24.67				23.998		25.147	26.674					27.27		24.789	22.51			24.896				23.163		25.235	26.76					27.365		24.586	22.387			24.752				23.856
d1-GM-CSF/LI-3- Sca1 MID (M)	66	22.907			24.623	23.896		26.435									24.18		27.191	23.676				22.929		26.363									23.92		27.236	23.331			24.673	22.955		26.85
d1-GM-CSF/LI-3- Sca1 MID (M)	67	26.711					26.499	25.265	24.236					24.124			22.785			26.435					26.691	25.259	23.935					23.988			22.73			27.008					26.514	26.47	24.56
d1-GM-CSF/LI-3- Sca1 MID (M)	68	26.208			24.78			25.878	24.236					24.662		25.513	22.542									26.033	24.288					24.781		24.43				28.758			24.74			26.01	24.326
d1-GM-CSF/LI-3- Sca1 MID (M)	69	24.528			24.939	24.919		24.421	24.316							24.526	22.274			24.67	27.781		24.783	25.125		24.28	24.977							24.556	21.859			24.639	27.439		24.563			24.362	24.685
d1-GM-CSF/LI-3- Sca1 MID (M)	70				24.754			24.723	23.426					24.744		23.612	25.387				27.483		24.664			24.578						24.698		23.214	25.14				27.165	28.731	24.365			24.562	25.26
d1-GM-CSF/LI-3- Sca1 MID (M)	71	26.519			24.578			24.982								24.408	23.251			26.273			24.7			25.124								24.439	22.51			25.721			24.856			24.89
d1-GM-CSF/LI-3- Sca1 MID (M)	72	22.575			21.329		24.925	20.888						24.21			22.297			22.914					24.621	20.675	24.369					24.542		25.801	22.578			22.643	27.511			27.69	24.298	20.862	24.313
d1-GM-CSF/LI-3- Sca1 MID (M)	73				24.671	24.249			24.278								22.126		27.321	24.302				24.306			24.411					24.36			22.362		27.316	24.178				24.198			24.562
d1-GM-CSF/LI-3- Sca1 MID (M)	74				25.277	25.412											23.137			23.946			26.674	25.333											22.791			23.495			26.622	24.968
d1-GM-CSF/LI-3- Sca1 MID (M)	75	25.377	27.751		24.648	27.152	23.191	23.613	26.953		26.841			23.583		25.767	23.651	27.826	27.718	25.557	27.468		24.235	26.723	23.618	23.696	26.252		26.279			23.852		25.814	23.856	28.005	27.56	25.981	27.622		23.825	26.72	23.66	23.234	26.04		26.454
d1-GM-CSF/LI-3- Sca1 MID (M)	76	25.633	24.338		24.443	26.739		26.437	22.436					25.204		25.431	23.918		25.987	25.07	24.342		24.145	26.971		26.13	22.984					25.398	26.004	25.085	23.95		25.975	25.792	24.286		24.518	26.574		25.777	22.6
d1-GM-CSF/LI-3- Sca1 MID (M)	77	25.997			24.463	27.199	28.885	24.453	27.805					23.766	26.332	26.152	24.012	28.932		25.891		26.907	24.777	27.666	28.523	24.01	27.779				29.677	23.745	25.764	26.284	24.599	29.547		25.775	28.415	27.269	24.692	27.145	28.971	24.349	27.9			28.823
d1-GM-CSF/LI-3- Sca1 MID (M)	78	22.487	26.552		25.332	24.323		24.363	24.74		29.166	29.874		27.703			22.96	27.248		22.067	26.659	26.066	25.384	24.598		24.048	24.274	26.713	28.447	29.37		27.428		25.787	22.234			22.98	26.804	26.32	25.653	24.524		24.513	24.895	26.366
d1-GM-CSF/LI-3- Sca1 MID (M)	79	23.181			21.217	23.069		22.109	22.632	29.165				23.563	27.05	26.368	20.629			23.154	28.727		21.481	23.325		21.952	22.274					23.805	26.652	26.715	21.027		27.684	22.717	28.938		21.397	22.098		21.735	22.104
d1-GM-CSF/LI-3- Sca1 MID (M)	80	24.186			24.559			22.178	26.27			25.821		26.033			23.318			24.19			24.651			21.834	26.115			26.163		26.919			23.202			24.066			24.363	27.589		21.896
d1-GM-CSF/LI-3- Sca1 MID (M)	81	23.499			25.165	24.148		22.186	23.019					23.542		28.358	23.531		26.784	23.834			24.474	24.205		22.187	22.876					23.472			23.972		26.856	23.383			24.369	24.097		21.9
d1-GM-CSF/LI-3- Sca1 MID (M)	82	22.146	25.164		22.007	25.311	23.257	21.19	22.627	27.284				22.539		24.676	22.641	27.934		22.249	25.779		22.042	25.232	23.008	20.452	22.384	24.786				22.468		24.289	22.808	27.385		22.115	25.504		22.148	24.867	22.939	20.902	22.223	26.703
d1-GM-CSF/LI-3- Sca1 MID (M)	83	24.672			24.809			23.419	23.769					24.605		26.338	20.638	28.825	28.468	25.092			24.69			23.136	24.013					24.507		26.28	20.675	29.17	28.964	24.958			24.771			23.824	23.624
d1-GM-CSF/LI-3- Sca1 MID (M)	84	26.483			25.932			26.668	26.191					26.533		27.237	23.92			26.211			26.429			26.03	25.815					26.786		27.166	23.314			26.462			26.195			26.787	25.827
d1-GM-CSF/LI-3- Sca1 MID (M)	85		29.626		26.774				25.881					25.195			23.878		29.838		30.213		26.638				26.986					24.998			23.579		29.175		29.663		26.53				26.003
d1-GM-CSF/LI-3- Sca1 MID (M)	86	26.781	25.136		25.693			23.457	24.835					25.778		25.41	24.353	29.415		26.733	25.176		25.492			23.852	24.184					25.995		24.327	24.09	28.882		26.595	25.157		25.56			23.291	23.887
d1-GM-CSF/LI-3- Sca1 MID (M)	87	24.429	25.805		24.091	25.05	27.444	24.311	24.277					25.58		24.423	25.298	27.417		24.39	26.158		23.731	24.695	26.842	24.271	23.535					25.581		24.453	25.574	26.957		24.49	26.113		23.575	25.342	27.178	24.652	24.019
d1-GM-CSF/LI-3- Sca1 MID (M)	88	22.786	27.13		25.161	23.896	21.99	21.651	23.293					23.348		23.509	24.137			23.555	27.463		25.101	23.061	22.653	21.577	23.047					23.508		23.111	24.303	27.921		23.21	26.952		25.699	23.754	22.89	21.707	23.495		22.954
d1-GM-CSF/LI-3- Sca1 MID (M)	89	26.59			21.465	23.794		22.211	24.833					26.338		24.305	23.221			26.314	26.856		21.152	22.827		21.754	24.208					26.42		24.336	23.254	27.452		26.887	26.889		20.945	22.853		22.85	24.629
d1-GM-CSF/LI-3- Sca1 MID (M)	90				24.719		25.347			28.257				25.42									24.898			23.3						25.134		25.698	24.832			28.637			24.293		25.137	22.935
d1-GM-CSF/LI-3- Sca1 MID (M)	91
d1-GM-CSF/LI-3- Sca1 MID (M)	92				25.816			24.298						25.633		24.768	25.393						25.011			24.362						25.331		24.896	25.931						25.864
d1-GM-CSF/LI-3- Sca1 MID (M)	93				24.496	25.91		26.323									24.066		25.408				25.292	26.131		26.251									23.806		26.571				24.67	26.936		26.738
d1-GM-CSF/LI-3- Sca1 MID (M)	94		29.372					25.153	26.008					25.443		26.048	22.365									25.147	26.801					25.608		25.655	22.112	30.714			29.439					26.358	26.712
d1-GM-CSF/LI-3- Sca1 MID (M)	95	26.087	26.828		26.388			25.766	25.662					26.38			23.766		28.02	26.827	26.711		26.25			25.921	25.774					26.636			23.608		27.12	26.201	26.407		26.052			25.898	25.762
d1-GM-CSF/LI-3- Sca1 MID (M)	96	24.407	29.857		25.82	27.171	25.916	24.725	23.859					24.534			25.308			24.549	29.645		25.65	27.849	25.414	24.208	24.289					24.222			25.73			24.518	29.311		25.624	27.287	25.573	24.547	24.067
d1-GM-CSF/LI-3- Sca1 MID (M)	97				26.604	27.109		27.849									26.435						26.495	26.365		27.686									26.235						26.335			27.736
d1-GM-CSF/LI-3- Sca1 MID (M)	98	26.398	28.47				26.385	24.87	25.878			26.526		27.111		28.427	22.998			26.152	28.348				26.577	25.012	25.444			26.567		27.591		28.292	23.143			25.6	27.991				26.4	24.778	25.193			26.327
d1-GM-CSF/LI-3- Sca1 MID (M)	99	22.454	25.007		23.306	24.478	24.811	20.776	22.297		27.463	25.829		22.971	26.434	23.169	23.023	25.717		22.793	25.03		23.202	24.438	24.507	20.563	22.759		27.089	25.579		22.747	26.672	23.171	22.677	25.158		22.522	25.056		23.47	24.002	24.184	20.75	22.153		27.335	25.448
d1-GM-CSF/LI-3- Sca1 MID (M)	100	22.898	27.242		25.273	24.008	22.102	21.763	23.405					23.46		23.621	24.249			23.667	27.575		25.213	23.173	22.765	21.689	23.159					23.62		23.223	24.415	28.033		23.322	27.064		25.811	23.866	23.002	21.819	23.607		23.066
d1-GM-CSF/LI-3- Sca1 HIGH (H)	101				23.689	27.98			23.365								23.84		26.387					27.595			23.374										26.544					27.869			23.478
d1-GM-CSF/LI-3- Sca1 HIGH (H)	102	22.19				27.007	24.967									28.692				22.317			24.744	26.582	24.603										23.642			22.138	27.252			26.753	24.446		23.573
d1-GM-CSF/LI-3- Sca1 HIGH (H)	103					24.533	27.262	24.457	25.666					23.668		25.015	23.2				27.641		25.166	24.974	27.644		25.409					24.335		24.501	23.972							24.707	27.533	26.925	25.854
d1-GM-CSF/LI-3- Sca1 HIGH (H)	104	21.51				22.931		21.525	24.408	27.94		27.321				25.169			27.948					22.879		21.42	24.612	27.802		27.203		25.825		26.272	23.785		28.016					22.84		22.31	24.838	27.52		27.72
d1-GM-CSF/LI-3- Sca1 HIGH (H)	105		27.012		24.752	27.636	23.814	21.913	24.994							22.812	23.583	26.438			27.25		24.87	27.754	23.745	21.409								22.529	24.643	25.379			27.143			27.403	23.418	22.663
d1-GM-CSF/LI-3- Sca1 HIGH (H)	106	24.133	27.479			27.604		24.365									23.871			24.092	26.548		24.891	27.818		24.257	22.933					25.241				28.978		23.684	27.115			27.178		24.982
d1-GM-CSF/LI-3- Sca1 HIGH (H)	107	22.331	26.972			25.261			23.848											22.082	26.627			24.818								25.291						22.036	26.276			24.604
d1-GM-CSF/LI-3- Sca1 HIGH (H)	108					27.542		21.876		27.308						26.802				21.872				27.499		21.522	24.332	26.49				25.176			23.947	28.073					25.167	28.055		21.829	25.299	26.644
d1-GM-CSF/LI-3- Sca1 HIGH (H)	109	22.708					26.735	26.41	22.94								23.525		26.594	22.763					26.354	26.131	23.18										26.88	22.789					26.899	26.593	22.86
d1-GM-CSF/LI-3- Sca1 HIGH (H)	110	22.394				24.352	26.092	23.127	21.017							29.375				22.441	26.584				25.849	23.029	21.343									27.271		22.586			25.658		25.48	23.371	21.336
d1-GM-CSF/LI-3- Sca1 HIGH (H)	111	24.255						25.32	26.933					26.283			24.543			25.193				25.69		24.876						27.042						25.043			26.365			26.33
d1-GM-CSF/LI-3- Sca1 HIGH (H)	112	26.599						24.831			27.225	25.83	26.369	21.273						26.183						25.262				25.345		21.548				28.295		26.348						26.018	23.551		27.252	25.286	26.685
d1-GM-CSF/LI-3- Sca1 HIGH (H)	113	22.596	27.079					24.468						26.754	26.893	24.136				22.765	26.124											26.354	26.569					22.533	26.962		24.579	25.452
d1-GM-CSF/LI-3- Sca1 HIGH (H)	114		24.378		22.862		24.547							26.463				28.509			25.009		22.552		24.093		23.553					26.564				29.097			24.74		22.857		24.702
d1-GM-CSF/LI-3- Sca1 HIGH (H)	115	24.136	26.441		23.579	24.218		22.591												23.847	26.726		23.174	24.205		23.109						24.235				27.424		24.263	26.923		24.118	24.771		23.267
d1-GM-CSF/LI-3- Sca1 HIGH (H)	116	24.258			21.985	27.307	25.908	28.637	26.223										28.845	24.137	26.217		21.74	27.223	26.664	27.903	23.532											24.383			22.25	27.492	26.006	28.102
d1-GM-CSF/LI-3- Sca1 HIGH (H)	117		26.352		22.986			21.525															23.046			21.42															23.138			22.31
d1-GM-CSF/LI-3- Sca1 HIGH (H)	118	23.379				25.973	24.395	21.913						25.328		26.389				23.3				26.787	24.677	21.409								26.227				23.523				25.815	24.264	22.663	24.41
d1-GM-CSF/LI-3- Sca1 HIGH (H)	119				25.47	27.278		24.365						27.34		27.085		28.05		22.187				27.752		24.257						25.274		26.843	24.6	27.995					25.46	26.411		24.982	24.517
d1-GM-CSF/LI-3- Sca1 HIGH (H)	120		27.847		25.275	25.111										26.257								25.708			24.419							26.444				22.743				25.707
d1-GM-CSF/LI-3- Sca1 HIGH (H)	121	22.577			25.48	26.634		21.876	25.292								23.888			22.916			25.14	26.81		21.522	26.412					25.163					28.446	22.645			24.148	26.512		21.829	25.037
d1-GM-CSF/LI-3- Sca1 HIGH (H)	122	24.133					26.68	26.41	25.949							25.996	23.79			24.092						26.131	26.656					25.73		25.352				23.684						26.593	26.542
d1-GM-CSF/LI-3- Sca1 HIGH (H)	123	22.331			26.875	27.98		25.6						22.763		29.12	24.119			22.082				27.595		23.73	24.15					24.47		29.197	23.687			22.036			26.74	27.869
d1-GM-CSF/LI-3- Sca1 HIGH (H)	124					27.007													27.08	26.452				26.582												27.679	27.365	27.061			26.622	26.753
d1-GM-CSF/LI-3- Sca1 HIGH (H)	125	22.454	25.007		23.306	24.478	24.811	20.776	22.297		27.463	25.829		22.971	26.434	23.169	23.023	25.717		22.793	25.03		23.202	24.438	24.507	20.563	22.759		27.089	25.579		22.747	26.672	23.171	22.677	25.158		22.522	25.056		23.47	24.002	24.184	21	22.153		27.335	25.448
d1-GM-CSF/LI-3- Sca1 HIGH (H)	126	24.01	27.998		28.069	29.425	24.683	24.472	24.913	28.555	27.102	25.707		24.167		26.266	24.306			23.969	28.459		28.259	29.555	24.89	25.353	24.834	28.555		25.222		24.781		26.104	24.972			23.561	28.331			28.946	24.716	26.778	24.851	28.613	27.129	25.163
d1-GM-CSF/LI-3- Sca1 HIGH (H)	127	22.208	27.541		22.498	24.095	25.858	21.254	21.918	27.101				21.931		26.962	20.709	26.315		21.959			22.22	24.082	26.622	21.385	22.216	27.361				21.968		26.72	20.429	25.256		21.913	27.549		22.678	24.648	25.212	21.57	22.011	27.41
d1-GM-CSF/LI-3- Sca1 HIGH (H)	128				24.159	27.184		24.045	23.678					24.186		26.134	23.46		27.234	26.329	27.727		24.859	27.1		25.472	23.739					24.373		26.321	24.019	28.855	27.059	26.938	27.88		24.541	27.369		25.052	23.995
d1-GM-CSF/LI-3- Sca1 HIGH (H)	129				26.833			27.447						26.147									26.526			26.949						25.781									26.007			27.789
d1-GM-CSF/LI-3- Sca1 HIGH (H)	130	22.818			26.674	25.85	24.424	22.155	22.846			26.482	26.749	26.417		25.873	23.783			22.749			25.539	26.664	23.97	22.087	23.204			26.992	26.839	25.667		25.229	24.67	27.95		22.796			25.434	25.692	24.579	23.251	23.435			27.035	26.988
d1-GM-CSF/LI-3- Sca1 HIGH (H)	131		25.908		26.407	27.155	28.657	25.332	28.514							28.997			26.471		26.122		26.505	27.629	28.61	25.949	25.785							29.074			26.757		26.05		25.928	26.288	28.32	25.648	26.708
d1-GM-CSF/LI-3- Sca1 HIGH (H)	132	22.067	27.389		23.677	24.988	25.785	21.397	23.024		27.397			22.714		24.354	23.672	27.117		22.194	27.132		23.898	25.585	26.541	21.209	23.098		27.418			22.566		24.26	23.065	27.148		22.015	27.83		23.48	25.584	25.883	22.041	22.92		27.511
d1-GM-CSF/LI-3- Sca1 HIGH (H)	133				24.852	26.511		24.048	23.557					27.608		25.327			27.203				25.627	26.687		24.726	24.224					27.387		26.069							24.943	26.389		25.24	23.976
d1-GM-CSF/LI-3- Sca1 HIGH (H)	134		28.582		25.326		24.272	23.604	25.265					25.136		27.006	24.126				27.741		25.516		24.554	22.348	24.936					24.758		27.684	24.284	28.172	29.745		28.292		25.497		24.141	24.678	25.236
d1-GM-CSF/LI-3- Sca1 HIGH (H)	135				25.396	27.857		22.468	23.922						27.499	28.569	23.436						24.522	27.472		22.986	23.875						27.394	28.004	23.398						24.836	27.746		23.144	24.286
d1-GM-CSF/LI-3- Sca1 HIGH (H)	136				25.493	26.884	26.049	28.514	25.778					25.281		24.892	23.122	28.386	28.119				24.988	26.459	26.697	27.78	26.635					25.901		24.378	23.406	28.974	28.152				24.885	26.63	26.028	27.979	25.766
d1-GM-CSF/LI-3- Sca1 HIGH (H)	137	22.585	26.598		22.739	24.41		21.402	22.817	27.185				23.39		25.046	23.54		28.112	22.64	26.107		22.429	24.851		21.297	23.057	26.367				22.991		26.149	23.02	27.301	27.44	22.666	26.113		22.734	24.584		22.187	22.737	26.521
d1-GM-CSF/LI-3- Sca1 HIGH (H)	138	22.271	26.465		20.968	22.808		21.79	20.894			26.735		22.427		22.689	21.605	25.515		22.318	26.324		21.094	22.756		21.286	21.22			26.263		22.931		22.406	21.254	25.879	28.329	22.463	25.835		20.713	22.717		22.54	21.213			26.501
d1-GM-CSF/LI-3- Sca1 HIGH (H)	139	24.132	26.36		27.032	27.513		24.242	25.415	27.917				25.964			21.687		28.071	25.07	25.658		26.576	27.631		24.134	26.535	27.301				25.746			21.76	28.973	28.139	24.92	26.042		26.817	27.28		24.859	25.16	27.983
d1-GM-CSF/LI-3- Sca1 HIGH (H)	140	26.476		25.172	26.1	27.481	24.844		26.072					26.16			25.568			26.06		25.697	25.446	27.695	24.48		26.779					26.919		29.055	24.925			26.225		24.934	25.915	27.055	24.323		26.665
d1-GM-CSF/LI-3- Sca1 HIGH (H)	141	22.473	26.889		21.862	25.138	27.139	21.753	23.171			25.078		21.15		26.679	20.593	27.927		22.642	27.127		21.617	24.695	27.521	21.399	23.662			24.808		21.425			20.614	27.872		22.41	27.02		22.127	24.481	27.41	21.706	23.436			25.327
d1-GM-CSF/LI-3- Sca1 HIGH (H)	142		27.356		25.019	27.419		26.287	26.282	28.724				26.631							26.425		26.142	27.376		26.008	26.481	28.942				26.231							26.992		26.612	27.932		26.47	26.348	28.25
d1-GM-CSF/LI-3- Sca1 HIGH (H)	143	24.013	26.849			26.134	23.691	23.004	25.543					26.34		29.252	23.818	29.229		23.724	26.504			27.048	23.622	22.906	25.286					26.441			24.314	28.961		24.14	26.153			25.677	23.295	23.248	25.731
d1-GM-CSF/LI-3- Sca1 HIGH (H)	144	24.135			24.841	27.071	25.889	25.197	24.285					26.429			22.647			24.014	28.724		24.464	26.294	26.105	24.753	24.489					26.015			23.047		28.141	24.26	28.461		24.19	26.782	26.12	26.207	24.715
d1-GM-CSF/LI-3- Sca1 HIGH (H)	145		26.956					24.708	26.211	27.817		27.198					25.857				26.001					25.139	26.011	27.679		27.08					25.994				26.839					25.895	25.558	27.397		27.597
d1-GM-CSF/LI-3- Sca1 HIGH (H)	146	23.256	24.255		23.456	23.466		21.387	21.616				24.8	21.957		24.013	18.27		24.505	23.177	24.886		23.051	23.681		20.069	20.833	26.448			24.272	21.81			18.24	27.556	23.969	23.4	24.617		23.995			21.604	21.3	26.481			24.536
d1-GM-CSF/LI-3- Sca1 HIGH (H)	147	22.083	26.318		22.853	24.341	26.612	24.095	24.61					24.796		25.115	24.702	27.482		22.323	26.603		23.834	23.92	26.231	23.659	24.188					24.483		25.781	24.403	27.562		21.911	26.8		23.747	24.121	26.776	25.356	24.709
d1-GM-CSF/LI-3- Sca1 HIGH (H)	148	21.332	25.724		22.863	24.004	25.969	22.748	22.564					25.147		24.086	23.145	27.596	27.401	21.535	25.796		22.923	24.266	25.726	22.631	22.636					25.172		24.116	22.984	27.031	27.419	21.371	26.185		23.015	24.175	25.357	23.309	22.559
d1-GM-CSF/LI-3- Sca1 HIGH (H)	149	22.708	26.721		22.862	24.533		21.525	22.94	27.308				23.513		25.169	23.663		28.235	22.763	26.23		22.552	24.974		21.42	23.18	26.49				23.114		26.272	23.143	27.424	27.563	22.789	26.236		22.857	24.707		22.31	22.86	26.644
d1-GM-CSF/LI-3- Sca1 HIGH (H)	150				24.282	27.307		24.168	23.801					24.309		26.257	23.583		27.357	26.452	27.85		24.982	27.223		25.595	23.862					24.496		26.444	24.142	28.978	27.182	27.061	28.003		24.664	27.492		25.175	24.118
d3-GM-CSF/LI-3- Sca1 EXTREME LOW(L')	151	23.605	19.382		23.966	24.611		23.772	21.228	25.165			25.367	23.31		21.877	20.749		25.368	23.608	19.515		23.64	24.457		24.166	22.025	24.82			25.168	23.411		22.284	20.699		24.804	23.686	19.37		24.03	24.787		24.032	21.947	25.026			25.268
d3-GM-CSF/LI-3- Sca1 EXTREME LOW(L')	152		18.602		25.555	23.913		22.469	21.6	24.388			24.059	23.389		21.747	22.578		22.672		18.797		25.735	23.823		22.48	22.058	25.765			24.644	23.824		21.702	22.578	28.478	22.903		18.637		25.725	24.051		23.723	22.429	25.43			24.608
d3-GM-CSF/LI-3- Sca1 EXTREME LOW(L')	153	25.285	20.482		21.78	24.404		22.517	22.367	27.272		25.624	26.892	24.238	26.675	23.569	20.457	29.015	24.087	25.611	20.748		21.743	24.528		23.026	23.102	25.983		25.225	25.841	23.749	26.699	23.697	20.817	29.524	24.21	25.527	20.69		21.696	24.48		22.923	23.302	25.857		25.963	26.432
d3-GM-CSF/LI-3- Sca1 EXTREME LOW(L')	154	24.109	19.601			25.723		25.772	21.836	25.198			23.935	24.157		21.961	20.994	27.958	24.403	24.516	19.761			24.975		26.469	22.059	25.363			24.108	23.855		21.923	20.841	28.341	24.375	23.778	19.666			25.328		26.226	22.316	24.725			23.936
d3-GM-CSF/LI-3- Sca1 EXTREME LOW(L')	155	22.63	23.041		26.538	24.661	22.648	23.66	22.445	26.693		23.713		22.171		24.036	20.475	25.284	25.382	22.598	23.329		27.466	24.398	22.483	23.884	22.582	27.381		23.352		22.094	27.686	24.343	20.586	25.207	25.357	22.732	23.519		27.178	24.493	22.536	24.051	22.587	27.134		23.376
d3-GM-CSF/LI-3- Sca1 EXTREME LOW(L')	156	25.559	18.858	25.609	23.098	25.349		23.924	22.079	24.246			23.635	22.746		22.477	20.858		23.672	25.424	18.833	26.462	23.253	25.621		24.687	22.815	24.876			23.64	22.956		22.234	20.835		23.437	25.522	18.998	26.292	23.424	24.821		25.985	22.852	24.394			23.274
d3-GM-CSF/LI-3- Sca1 EXTREME LOW(L')	157	24.696	18.701		25.527	24.934		24.24	22.486	25.736			25.63	23.401		22.472	22.023	27.147	23.61	25.216	19.025		25.695	25.872		24.851	23.426	25.368			26.507	23.501		22.385	21.808	27.989	23.446	25.693	18.803		25.46	25.547		25.13	22.897	25.318			26.031
d3-GM-CSF/LI-3- Sca1 EXTREME LOW(L')	158	24.738	19.74		23.836	24.328		24.658	22.06	25.666			25.83	23.265	25.154	23.041	23.651	27.755	22.642	24.922	19.884		24.041	25.916		25.226	23.236	25.782			25.815	23.566	25.253	22.836	23.674	27.569	22.771	24.164	19.95		24.003	25.283		25.481	23.259	26.691			25.536
d3-GM-CSF/LI-3- Sca1 EXTREME LOW(L')	159		20.206		25.052	25.718		23.701	23.119				25.708	23.942		22.747	20.556	27.128	24.34		20.379		25.599	27.517		23.62	23.4				24.755	23.976		22.83	20.614		23.899		20.201		24.593	25.99		24.511	23.643				25.096
d3-GM-CSF/LI-3- Sca1 EXTREME LOW(L')	160		20.157		25.518	26.523		23.49	22.987				24.767	23.92		22.355	20.819	27.95	24.117		20.152		25.207	27.001		23.478	23.732				25.726	24.373		22.414	20.997	28.092	24.561		20.27		25.421	27.224		24.04	23.821				26.208
d3-GM-CSF/LI-3- Sca1 EXTREME LOW(L')	161	24.546			24.468	25.85	26.334	22.068	22.591					24.146		25.014	22.53			24.781			24.722	25.556	26.097	22.761	23.633					24.175		24.924	22.633	27.932		24.6			24.377	26.032	25.869	22.971	23.645
d3-GM-CSF/LI-3- Sca1 EXTREME LOW(L')	162	22.656	26.677		26.289	27.791	21.945	24.634	23.717				24.896	25.398		26.589	24.761			22.476	26.54		26.112	27.031	21.895	24.091	24.373				25.475	25.199		27.558	24.786			22.63	26.264		26.108	27.496	22.335	24.266	24.014				24.851
d3-GM-CSF/LI-3- Sca1 EXTREME LOW(L')	163	24.266	17.695			25.323		22.235	21.262				26.283	23.731	26.773	22.388	20.684	28.998	23.42	24.318	17.795			25.147		22.603	21.692				26.592	24.014	26.047	22.67	20.517	28.891	23.86	24.294	17.862			24.903		22.384	21.998				26.39
d3-GM-CSF/LI-3- Sca1 EXTREME LOW(L')	164		17.736		23.883	24.091		26.789	21.192				25.393	21.964		21.622	22.277		23.635		17.984		24.251	24.14		26.946	21.59				25.423	21.766		21.86	22.074		23.482		18.063		23.8	24.421		27.25	21.898				24.942
d3-GM-CSF/LI-3- Sca1 EXTREME LOW(L')	165	21.188	27.289		25.693	25.663	21.529	21.693	25.007			22.811	25.873	24.061			23.835	27.477		21.51	27.356		25.575	25.931	21.644	22.074	24.772			22.404	26.041	23.835			24.15	27.076		21.316	27.515		25.644	25.341	21.697	21.906	24.969			22.635	25.565
d3-GM-CSF/LI-3- Sca1 EXTREME LOW(L')	166	23.781				26.42	20.517	22.083	23.861					26.406			26.344	27.308	26.424	24.708				26.119	20.682	22.511	24.303					25.754			26.18	27.196	26.249	23.918				25.965	20.756	22.784	24.406
d3-GM-CSF/LI-3- Sca1 EXTREME LOW(L')	167	24.742	17.502		25.209	25.491		23.783	21.227	24.159			24.31	22.703		22.627	21.092	27.595	24.478	24.473	17.602		25.161	24.938		24.189	21.78	23.655			23.973	22.704		22.775	20.961	26.795	24.28	24.315	17.53		25.459	25.361		24.553	21.896	23.49			23.354
d3-GM-CSF/LI-3- Sca1 EXTREME LOW(L')	168	25.503	18.683		23.734	24.835		22.269	21.657	23.395		27.736	23.604	22.586		22.416	21.614	28.183	22.434	26.183	18.918		24.043	25.59		23.087	22.03	23.259		27.907	23.341	22.577		22.53	21.552	28.817	22.468	25.562	18.727		23.44	24.714		23.55	21.943	23.2		27.059	23.683
d3-GM-CSF/LI-3- Sca1 EXTREME LOW(L')	169	23.615	16.541		25.075	24.34		24.554	21.005	24.341			23.832	21.502	25.969	22.157	21.504		23.215	23.411	16.835		24.809	24.751		25.498	21.367	24.447			23.893	21.75	26.736	22.081	21.165	27.898	23.157	23.68	16.763		24.977	24.38		25.685	21.765	24.136			23.736
d3-GM-CSF/LI-3- Sca1 EXTREME LOW(L')	170	24.669	19.378			24.192		23.188	22.346	23.221			23.093	21.598	26.783	21.906	20.41		22.743	24.366	19.614			24.306		23.702	22.249	23.95			22.945	21.611	26.112	21.929	20.669		22.518	24.951	19.466			24.277		23.819	21.925	23.38			23.272
d3-GM-CSF/LI-3- Sca1 EXTREME LOW(L')	171	21.518	25.858		22.842	24.733	22.778	21.118	22.639					22.987		24.328	23.299	25.743	27.03	21.66	25.92		22.568	25.046	22.651	21.8	22.679					23.074		24.438	23.056	25.819	27.782	21.547	25.626		22.484	25.997	22.761	22.442	22.913
d3-GM-CSF/LI-3- Sca1 EXTREME LOW(L')	172	24.859	16.238		23.594	24.252		23.003	21.555				23.964	23.313		22.024	21.07		22.173	25.093	16.7		23.359	24.041		22.013	21.185	24.705			23.729	23.243		22.165	20.84		22.748	25.2	16.762		23.266	22.902		23.609	21.644	24.236			23.156
d3-GM-CSF/LI-3- Sca1 EXTREME LOW(L')	173	25.251	18.672		21.653	25.151		22.606	20.691	25.621			24.26	21.854		22.653	19.453	27.494	23.494	25.252	18.783		21.551	25.182		22.445	21.226	25.653			24.489	21.935		22.359	19.513	27.127	23.839	24.736	18.609		21.499	25.824		22.899	21.223	25.852			24.64
d3-GM-CSF/LI-3- Sca1 EXTREME LOW(L')	174	24.255	17.132		23.096	26.857		23.348	21.942	24.812			24.923	21.572		21.678	19.585	27.91	23.117	24.025	17.09		23.257	27.646		23.654	21.802	24.375			24.584	21.621		21.821	19.663	27.456	22.969	24.155	17.101		23.061	27.87		23.334	22.037	24.659			24.365
d3-GM-CSF/LI-3- Sca1 EXTREME LOW(L')	175	24.495	20.854	27.101	23.695	24.595	23.556	23.38	22.765	26.095			25.405	23.511		23.036	21.626	28.475	26.318	23.994	20.916	27.328	23.815	24.838	23.46	23.367	22.881	25.937			25.846	23.316		22.924	21.49		26.241	24.574	20.837		23.676	24.82	23.144	23.794	23.393	25.222			25.172
d3-GM-CSF/LI-3- Sca1 EXTREME LOW(L')	176	25.01	19.82		24.934	26.637		23.298	21.491	24.831			24.676	22.715		22.521	21.977	28.93	23.164	25.196	19.686		25.165	26.667		23.042	21.822	24.998			25.369	22.833		22.584	22.175		23.231	25.071	19.612		24.86	26.71		23.938	22.194	25.04			24.977
d3-GM-CSF/LI-3- Sca1 EXTREME LOW(L')	177		20.008		25.474	24.292		25.224	22.536				24.576	24.58	25.732	22.593	22.653		23.99		19.845		25.791	23.98		24.769	22.718				24.947	24.271	26.308	22.873	22.482		24.397		19.866		25.095	23.807		25.808	22.864				24.693
d3-GM-CSF/LI-3- Sca1 EXTREME LOW(L')	178		20.362	25.761	26.616	25.091		23.314	21.202	26.951			25.413	22.797		24.412	21.159	28.692	23.912		20.379	25.48	25.777	24.891		23.742	21.371				24.769	22.312		23.918	21.445	28.915	24.305		20.369	25.705	25.745	24.993		24.379	21.605	27.262			24.892
d3-GM-CSF/LI-3- Sca1 EXTREME LOW(L')	179	25.361	18.972	25.565		26.831		24.298	22.882	26.58			25.544	24.912	26.765	22.437	22.497		24.231	25.669	18.897	25.184		26.315		24.414	23.224	26.612			26.152	24.531	26.397	22.136	21.95		24.446	25.428	18.766	25.935		26.62		24.674	23.031	26.283			26.062
d3-GM-CSF/LI-3- Sca1 EXTREME LOW(L')	180		20.736		24.613	25.223		24.139	21.869	25.198			24.662	24.49		23.175	22.141		23.798		20.821		24.752	24.848		24.059	22.092	25.083			25.431	24.289		22.968	21.588		24.102		20.859		24.509	25.033		25.036	22.292	24.756			24.84
d3-GM-CSF/LI-3- Sca1 EXTREME LOW(L')	181	25.634	19.867		23.707	26.816		23.68	23.176				25.814	23.556		23.421	23.289		25.894	25.867	19.848		23.597	26.378		23.802	23.216				25.952	24.316		23.043	23.468		25.21	26.098	19.887		23.578	26.794		24.615	22.842				26.268
d3-GM-CSF/LI-3- Sca1 EXTREME LOW(L')	182	26.05	21.166		25.592	25.183		25.393	21.63				26.453	24.438		22.644	23.47	28.244	23.801	26.8	21.247		25.183	24.564		25.34	21.782				26.991	23.927		22.722	23.155	28.334	24.045	26.655	21.273		25.532	24.924		25.435	21.895				26.922
d3-GM-CSF/LI-3- Sca1 EXTREME LOW(L')	183	25.712	18.998		23.699	25.494		24.928	22.402	25.313			26.984	23.206		22.688	22.343		24.026	26.436	18.872		23.689	25.65		24.543	22.721	25.742				23.694		22.683	22.332	28.876	23.812	26.536	19.038		23.73	24.864		24.044	22.441	25.617			26.975
d3-GM-CSF/LI-3- Sca1 EXTREME LOW(L')	184		17.963					23.254	22.002	25.55				23.646		21.686	19.626	28.811	24.966		17.972					23.454	22.966	25.166				24.211		21.995	19.769		24.346		17.84					23.818	23.098	25.274
d3-GM-CSF/LI-3- Sca1 EXTREME LOW(L')	185	26.153	21.269		25.695	25.286		25.496	21.733				26.556	24.541		22.747	23.573	28.347	23.904	26.903	21.35		25.286	24.667		25.443	21.885				27.094	24.03		22.825	23.258	28.437	24.148	26.758	21.376		25.635	25.027		25.538	21.998				27.025
d3-GM-CSF/LI-3- Sca1 EXTREME LOW(L')	186	25.182	20.379		21.677	24.301		22.414	22.264	27.169		25.521	26.789	24.135	26.572	23.466	20.354	28.912	23.984	25.508	20.645		21.64	24.425		22.923	22.999	25.88		25.122	25.738	23.646	26.596	23.594	20.714	29.421	24.107	25.424	20.587		21.593	24.377		22.82	23.199	25.754		25.86	26.329
d3-GM-CSF/LI-3- Sca1 EXTREME LOW(L')	187	24.098	17.951		25.898	24.809		24.126	21.282	25.481			23.484	22.306		21.696	23.526		23.745	24.062	18.055		25.382	25.082		24.349	21.699	25.646			23.433	22.325		21.558	23.397		23.225	23.689	17.843		25.22	24.906		24.021	21.518	25.775			23.921
d3-GM-CSF/LI-3- Sca1 EXTREME LOW(L')	188	25.231	25.462			25.416		21.277	23.11					23.807		26.112	21.396			25.842	25.454			25.56		21.314	23.585					23.475		26.226	21.433	28.984	29.263	24.882	25.074			26.659		21.827	23.497
d3-GM-CSF/LI-3- Sca1 EXTREME LOW(L')	189	23.722	23.018		23.394	25.932		24.488	21.535	24.824			24.362	24.517	24.171	22.039	20.943	31.123	25.802	23.797	23.308		23.354	26.818		24.617	21.969	25.391			23.662	24.386	24.43	22.245	21.295	30.772	25.638	23.57	23.182		23.69	26.215		25.161	21.737	24.827			23.448
d3-GM-CSF/LI-3- Sca1 EXTREME LOW(L')	190		19.023		22.705	25.484		23.455	22.235				25.157	22.215		22.305	20.587	29.612	26.024		18.994		22.898	24.924		23.26	22.717				25.499	22.168		22.65	20.618	29.814	25.545		18.961		22.66	25.639		23.317	22.287				25.376
d3-GM-CSF/LI-3- Sca1 EXTREME LOW(L')	191	26.644	19.539			25.71		27.554	23.961	25.415			24.266	24.245		25.137	23.474	29.052	24.714	26.606	19.886			25.937		27.049	24.559	25.397			24.56	24.155		23.495	23.728		24.721	26.333	19.625			24.88		27.568	24.097	25.669			24.307
d3-GM-CSF/LI-3- Sca1 EXTREME LOW(L')	192	27.701	19.432		25.556	25.193			22.414				24.159	25.942	25.184	21.558	22.627		23.699	27.49	19.46		25.597	25.314			22.561				24.169	25.441	24.912	21.789	22.505	28.718	23.841		19.422		25.381	25.202			22.55				23.973
d3-GM-CSF/LI-3- Sca1 EXTREME LOW(L')	193		19.958		24.696	24.601		25.48	23.037	25.19			25.862	23.427	25.147	23.745	21.637	28.835	23.028		20.096		25.227	24.658		25.849	22.648	25.717			25.772	23.481	25.135	23.08	21.581	28.846	22.888		19.9		24.709	25.06		25.983	23.4	26.255			25.909
d3-GM-CSF/LI-3- Sca1 EXTREME LOW(L')	194	24.511	18.439		23.411	23.938		23.055	21.416	24.989			24.367	22.492		22.06	21.021		23.84	25.611	18.733		23.169	23.943		23.886	21.53	24.523			24.513	22.66		21.718	21.174	28.696	23.432	24.577	18.665		23.047	23.747		23.846	21.767	25.064			24.145
d3-GM-CSF/LI-3- Sca1 EXTREME LOW(L')	195	23.887	23.96		26.517	25.492		24.995	21.887					23.902	25.899	23.093	20.292		24.114	24.076	24.302		26.674	25.794		26.077	23.194					24.005	25.131	23.304	20.266	27.45	24.338	23.985	23.841		26.431	26.041		26.548	22.847
d3-GM-CSF/LI-3- Sca1 EXTREME LOW(L')	196	23.448	17.85		24.613	24.752		24.907	21.155				24.922	21.858		21.341	20.841	26.499	23.677	24.322	18.896		24.429	24.822			19.803	23.636			24.749	22.065			20.139	26.456	23.997	25.183	18.933		24.72			24.716	20.559	24.612			25.368
d3-GM-CSF/LI-3- Sca1 EXTREME LOW(L')	197		24.176		27.96	26.801		24.261	22.172					25.672	25.12	26.369	21.494				24.513		27.849	26.075		24.127	22.244					26.172	24.559	25.612	21.601	27.937	27.062		23.711		27.542	26.764		24.104	22.292
d3-GM-CSF/LI-3- Sca1 EXTREME LOW(L')	198	24.03	18.535		24.052	25.313		24.71	21.054	23.839			22.719	21.5		21.349	22.777	28.018	23.621	24.781	18.852		24.461	24.897		25.317	21.133	23.6			22.595	21.724		21.338	22.963		23.523	24.215	18.47		23.899	25.08		25.531	21.067	23.783			22.658
d3-GM-CSF/LI-3- Sca1 EXTREME LOW(L')	199	24.962	16.341		23.697	24.355		23.106	21.658				24.067	23.416		22.127	21.173		22.276	25.196	16.803		23.462	24.144		22.116	21.288	24.808			23.832	23.346		22.268	20.943		22.851	25.303	16.865		23.369	23.005		23.712	21.747	24.339			23.259
d3-GM-CSF/LI-3- Sca1 EXTREME LOW(L')	200	24.639	17.399		25.106	25.388		23.68	21.124	24.056			24.207	22.6		22.524	20.989	27.492	24.375	24.37	17.499		25.058	24.835		24.086	21.677	23.552			23.87	22.601		22.672	20.858	26.692	24.177	24.212	17.427		25.356	25.258		24.45	21.793	23.387			23.251
d3-GM-CSF/LI-3- Sca1 LOW(L)	201		17.092			22.682		22.175	22.173				24.225	23.425	24.211	21.389	22.419	26.886	22.301		17.219			23.159		22.095	22.633				24.582	23.563	24.418	21.252	22.505	26.563	22.061		17.067			23.1		22.333	22.15				24.392
d3-GM-CSF/LI-3- Sca1 LOW(L)	202	24.363	28.35		25.746	24.871		24.09	20.858	27.26			25.024	22.127		22.901	20.83		24.435	24.519	28.161		25.806	24.212		24.326	21.371	27.551			25.603	21.533		22.803	20.84	29.25	24.926	25.036	28.21		24.799	24.707		24.004	21.24	27.448			25.791
d3-GM-CSF/LI-3- Sca1 LOW(L)	203	24.161		21.817	20.83		20.02					21.033		22.407						24.436		21.825	20.871		20.321					20.553		22.308						24.391		21.465	21.142		20.425					20.993
d3-GM-CSF/LI-3- Sca1 LOW(L)	204	22.35				23.685								21.787	22.299		17.976	26.333		22.125	22.056		23.453	23.691		19.739	19.892	25.778				22.723	22.831		18.42	26.924		22.658	22.588		23.83	23.723		20.094	20.337	25.319
d3-GM-CSF/LI-3- Sca1 LOW(L)	205	21.452			26.565	26.792	20.011	21.569	24.864					22.629			22.095		27.3	21.064			26.361	26.347	20.109	21.909	24.488					23.017			22.565			21.128	28.675		26.391	26.158	19.982	22.048	24.065
d3-GM-CSF/LI-3- Sca1 LOW(L)	206	23.255	27.891		25.686		21.279	22.156	26.651					28.658	26.338				27.494	23.478	27.033		25.68		21.467	22.497	26.787						26.035		28.246		27.964	23.263	27.592		25.609		21.377	22.816	26.603
d3-GM-CSF/LI-3- Sca1 LOW(L)	207	21.52	28.721		21.897	24.443		19.506	22.02			24.416		23.233	28.348	28.676	21.578	29.87	27.332	21.716			21.825	24.393		19.842	22.641			24.027		22.947	28.413	28.592	21.668	29.07	27.21	21.559			21.874	24.232		19.85	22.752			23.766
d3-GM-CSF/LI-3- Sca1 LOW(L)	208	24.288	25.154		23.286	24.848	24.255	21.234	20.209					23.132		25.569	19.552	29.419	25.832	24.49	25.582		23.684	25.305	25.08	21.574	20.616					22.978		26.421	19.38		25.961	24.073	25.35		23.148	25.505	25.23	21.581	20.761
d3-GM-CSF/LI-3- Sca1 LOW(L)	209	23.785	28.92		24.559	25.681	26.581	21.81	20.634					20.639			20.308			23.927	29.132		24.415	25.483	26.558	22.256	21.088	28.837				20.547			20.474			23.785	28.99		24.592	25.864	0.114	22.506	21.097	28.607
d3-GM-CSF/LI-3- Sca1 LOW(L)	210	24.962	25.014		22.284	26.901	26.267	21.179	23.108							26.283	28.427	27.115		25.158	25.276		22.267	27.069	26.148	21.963	23.734							26.012	28.403	27.719		25.444	25.341		22.32	27.041	26.412	21.851	23.945
d3-GM-CSF/LI-3- Sca1 LOW(L)	211	24.681			24.591	23.381	22.338	20.16	20.493	26.093		24.942		23.456			18.788	27.405		24.758			24.283	23.508	22.249	20.753	21.081	26.321		24.947		23.431			18.97	27.674		24.848			23.972	23.6	22.372	20.756	21.217	26.763		24.865
d3-GM-CSF/LI-3- Sca1 LOW(L)	212	25.093			23.817	24.001	22.067	28.814	21.224			24.581		23.235			20.173			24.99			23.692	24.341	21.952		22.331			24.678		23.008			20.343			25.083			23.328	24.374	21.928		22.022			24.704
d3-GM-CSF/LI-3- Sca1 LOW(L)	213	23.361			23.323	25.355		21.901	24.032					23.442	24.883	27.982	23.789	25.951		23.697			22.942	25.068		21.941	24.04		27.224			22.886	25.88	27.285	23.425	26.661		23.871			22.741	24.399		21.381	23.679		26.816
d3-GM-CSF/LI-3- Sca1 LOW(L)	214	22.642			23.687	25.602	24.065	21.93	24.996					24.201	24.294	27.171	23.515			22.457			23.956	25.223	23.828	21.597	24.514		26.235			24.164	25.44	27.344	22.959	28.388		22.545			23.771	25.057	23.837	21.797	24.724		26.136
d3-GM-CSF/LI-3- Sca1 LOW(L)	215	22.417			23.509	24.748	21.405	21.111	23.944			23.662		21.159	24.764	24.922	24.087	26.2		22.391			23.637	24.42	21.727	21.122	23.944		27.576	23.284		21.496	24.446	24.547	23.331	26.493		22.605			24.005	24.079	21.254	20.456	23.55			24.08
d3-GM-CSF/LI-3- Sca1 LOW(L)	216	23.917			24.416	24.364	25.968	24.379	24.055					23.614	24.585	25.694	24.034		26.56	24.16			24.624	24.367	25.724	24.082	23.945					23.89	24.703	25.561	23.035	27.297	26.19	23.667			24.589	24.466	25.109	23.271	23.273
d3-GM-CSF/LI-3- Sca1 LOW(L)	217	24.343			25.24		21.725	25.651	27.558			23.343		23.646		28.927	26.799	28	27.17	23.996			25.519		21.888	26.129	27.916	26.058		23.621		23.873		28.195	26.23		27.269	23.962			25.662		20.944	26.327	27.727			23.388
d3-GM-CSF/LI-3- Sca1 LOW(L)	218	23.647			21.999	27.693	24.141	22.72	26.203			26.131		24.005			23.321			23.54			21.481	27.596	24.966	23.484	26.58			25.588		24.359			24.114			23.473			22.825		25.116	23.875	25.634			26.062
d3-GM-CSF/LI-3- Sca1 LOW(L)	219	24.133	30.026		21.532	27.645	26.467	22.742	23.585			25.206		22.615	27.856		21.926	28.182	29.559	24.375			22.03	27.72	26.444	21.625	23.652			25.547		22.286	24.81		20.876	28.293	29.896	24.846	30.192		22.156	27.081		21.935	23.46			25.374
d3-GM-CSF/LI-3- Sca1 LOW(L)	220	24.932				25.139		29.28	22.857					29.521	26.369	26.101	20.95	28.5		25.124				25.421			23.551						26.349	26.94	20.801	28.205		25.774				25.389		30.332	23.185
d3-GM-CSF/LI-3- Sca1 LOW(L)	221	24.487			22.105	25.053	25.635	23.033	23.372					23.095		25.024	21.777	27.222	28.379	24.05			21.923	24.99	25.948	22.633	23.053					22.847		24.922	21.658		28.05	24.22			22.149	24.791	24.573	22.694	23.333
d3-GM-CSF/LI-3- Sca1 LOW(L)	222	23.681	28.816		24.455	25.577	26.477	21.706	20.53					20.535			20.204			23.823	29.028		24.311	25.379	26.454	22.152	20.984	28.733				20.443			20.37			23.681	28.886		24.488	25.76		22.402	20.993	28.503
d3-GM-CSF/LI-3- Sca1 LOW(L)	223				24.785	25.536		22.542	22.653					22.656	24.863	26.744	24.641			23.873	27.006		24.871	25.356	22.261	22.255	22.658					23.377	25.191		23.987	28.957		24.066	27.19		24.705	25.516	22.215	22.373	22.741
d3-GM-CSF/LI-3- Sca1 LOW(L)	224	23.406	26.708		24.396	25.99	24.411	22.316	22.599					22.604		25.084	24.171	25.98		23.746	27.333		24.859	26.347	25.316	22.297	22.931					22.738		25.529	24.095	26.009		23.565	27.694		24.838	26.573	24.736	22.249	22.677
d3-GM-CSF/LI-3- Sca1 LOW(L)	225		19.612			23.353	21.839	24.36	19.809	25.522			23.427	21.829	25.039	22.523	22.476	28.031			19.747			23.515	22.002	24.292	20.561	24.964			23.088	22.008	25.462	22.606	22.677	28.55			19.596			23.636	21.058	24.666	20.387	24.839			22.834
d3-GM-CSF/LI-3- Sca1 LOW(L)	226		19.317			22.741	24.255		22.68	28.051			26.422	23.311		26.293	22.102		26.287		19.587		29.149	23.167	25.08		23.609				26.217	22.897		26.722	21.925		25.913		19.213		29.174	23.103	25.23		23.741	28.147			25.379
d3-GM-CSF/LI-3- Sca1 LOW(L)	227		25.242	24.075		23.356	19.65	23.704	19.029					27.473			18.159			26.782	26.966	24.302	28.536	22.955	19.53				27.392			27.139			17.86			26.38					20.014	23.41	18.654
d3-GM-CSF/LI-3- Sca1 LOW(L)	228	23.754			24.123			22.625	21.985					24.357		23.896	19.256			24.364			24.138			22.217	22.085					23.995		24.158	19.283			23.814			23.69			22.782	22.018
d3-GM-CSF/LI-3- Sca1 LOW(L)	229	24.571			23.651		24.101	21.145	25.246					24.607					26.263	24.481	29.341		23.14		23.957	21.229	25.1					24.247			28.027		26.491	24.794	29.388		23.417		24.216	21.557	25.073
d3-GM-CSF/LI-3- Sca1 LOW(L)	230	24.521					24.45	24.1	21.087	25.754			27.377	23.302		24.149	18.627	29.041	24.825	23.843			29.126		23.966	24.559	21.09	26.885			28.301	23.304		24.15	18.575		24.232	23.742					24.11	24.253	21.051	26.201			28.215
d3-GM-CSF/LI-3- Sca1 LOW(L)	231	23.396			22.568	22.839	22.665	23.598	20.613	26.465		25.959		22.692	23.615	24.328	19.704			24.077			22.615	23.095	22.837	23.252	20.853	26.643		25.799		22.437	24.07	24.047	19.615	29.321		23.53			22.694	23.019	22.757	23.982	20.686	26.572		26.353
d3-GM-CSF/LI-3- Sca1 LOW(L)	232				24.877	22.566	25.765	22.246	21.525	26.389		25.75		22.064			20.86			29.062			24.76	22.919	26.211	22.376	21.745	26.4		25.183		22.41			21.055						24.917	22.303	25.755	22.483	21.7	26.47		25.225
d3-GM-CSF/LI-3- Sca1 LOW(L)	233	22.851	27.063		23.904	23.832	25.352	21.328	20.939	25.467		26.63		22.179	25.706		20.415	27.251		22.934	27.16		23.707	23.264	25	21.444	21.004	24.733		26.502		22.441	26.05		20.507	27.476		23.461	27.206		23.985	23.937	25.123	21.313	20.98	24.996		26.464
d3-GM-CSF/LI-3- Sca1 LOW(L)	234	24.828				25.035		29.176	22.753					29.417	26.265	25.997	20.846	28.396		25.02				25.317			23.447						26.245	26.836	20.697	28.101		25.67				25.285		30.228	23.081
d3-GM-CSF/LI-3- Sca1 LOW(L)	235	22.282	27.592		22.543	24.881	22.74	21.337	21.697					22.73	25.567	26.033	24.054	26.487	24.193	22.531	27.813		22.403	24.696	22.77	21.205	21.892					23.048	25.972	26.158	24.103	26.289	24.292	22.472	27.556		22.361	24.392	22.927	21.518	21.714
d3-GM-CSF/LI-3- Sca1 LOW(L)	236	22.411			24.847	23.365		22.806	22.968		25.232	24.667		24.743	24.954	25.309	22.98	27.885	26.747	22.409			24.995	23.634		22.965	22.817		24.943	24.74		24.299	24.765	25.869	23.082	27.775	26.422	22.428	29.52		25.438	23.123		22.796	22.943		25.205	23.952
d3-GM-CSF/LI-3- Sca1 LOW(L)	237	24.379	25.296		23.263	24.915	26.153	22.615	23.607			26.823		23.99	25.747	28.91	23.236	27.645		24.522	25.281		23.311	24.301	26.034	22.487	23.075			26.761		23.675	25.497	28.747	23.26	27.881		24.563	25.262		23.225	24.608	26.298	22.68	23.019		27.852	26.706
d3-GM-CSF/LI-3- Sca1 LOW(L)	238	22.599			23.213	25.854	22.224	22.441	26.714			25.503		24.265	24.864		24.58	27.568	28.403	22.822			23.781	26.197	22.135	22.318	26.285			25.387		24.553	25.38		24.027	27.658	28.563	22.885			23.424	25.501	22.258	22.268	26.663			25.853
d3-GM-CSF/LI-3- Sca1 LOW(L)	239	22.531				26.518	21.953	23.437	25.69					28.724	27.361		27.267	28.423		23.275				26.046	21.838	23.842	25.194					28.791	27.045		27.027			22.976				26.566	21.814	23.972	25.301
d3-GM-CSF/LI-3- Sca1 LOW(L)	240	23.527				25.769		24.327	25.49			24.832		27.525			23.302			23.848				25.726		24.319	25.635			24.837		27.067			23.582			23.774				25.999		23.953	25.295			24.755
d3-GM-CSF/LI-3- Sca1 LOW(L)	241	25.468			25.497	28.482	25.925	24.594	25.77			26.082		26.922			23.028			25.575			25.282	28.393	25.729	24.33	26.271			25.922		26.252			23.304			26.145			25.875	28.403	25.983	24.881	25.89			26.476
d3-GM-CSF/LI-3- Sca1 LOW(L)	242	23.141			26.764	26.798	22.157	23.625	23.731			25.873		24.798	24.538		25.548	27.071		23.191			25.632	26.393	22.001	23.445	24.144			25.306		24.416	24.604		25.078	27.851		23.344			25.528	26.791	21.934	23.376	24.452			25.348
d3-GM-CSF/LI-3- Sca1 LOW(L)	243	23.278			28.107	26.103	23.921	21.646	23.65			26.753		24.419	25.697		22.957	27.962	27.787	23.379				26.217	24.148	21.574	24.3			26.625		24.231	25.719		22.662	28.073	27.419	23.382			28.127	25.731	23.822	21.494	23.838			26.587
d3-GM-CSF/LI-3- Sca1 LOW(L)	244	24.765	26.946		24.497	26.527		23.293	23.275					26.505		23.612	21.972	27.285	24.953	24.808	26.487		23.873	26.794		23.072	23.35					26.141		23.832	22.112	27.834	25.322	25.3	26.497		24.544	26.922		23.439	23.255
d3-GM-CSF/LI-3- Sca1 LOW(L)	245	26.421		26.252		26.75	23.282	23.821	24.674					24.096	26.343	27.174	23.623	27.317		26.271		26.516		27.3	23.753	23.83	24.877					24.402	26.301	26.625	23.546	27.887		25.542		26.687		26.92	23.221	24.436	25.566
d3-GM-CSF/LI-3- Sca1 LOW(L)	246				22.78	25.039	24.336	21.946	22.965					22.702		24.389	20.93	26.158	25.967	22.865	25.791		23.162	24.921	23.852	20.433	21.485					23.093		24.205	20.782	26.475	26.004	23.077	25.978		23.07	24.354	23.996	21.423	22.414	28.292
d3-GM-CSF/LI-3- Sca1 LOW(L)	247	23.619			24.752	27.417	22.551	23.074	25.535			24.471		23.844			24.039	28.909	28.874	23.371			24.518	27.868	22.723	22.816	25.585			24.568		24.068			24.69	28.14	29.234	23.526			24.75	27.676	22.643	22.807	25.605			24.594
d3-GM-CSF/LI-3- Sca1 LOW(L)	248	24.288	27.887		25.262	26.126	25.651	23.86	23.847			26.034		23.848	26.207		22.634	28.269	29.661	23.918	28.404		25.075	25.805	26.097	23.419	23.343			25.698		23.585	26.959	26.987	22.826	28.952	29.401	24.498			24.873	25.242	25.641	23.246	23.854			26.085
d3-GM-CSF/LI-3- Sca1 LOW(L)	249	24.411	25.277		23.409	24.971	24.378	21.357	20.332					23.255		25.692	19.675	29.542	25.955	24.613	25.705		23.807	25.428	25.203	21.697	20.739					23.101		26.544	19.503		26.084	24.196	25.473		23.271	25.628	25.353	21.704	20.884
d3-GM-CSF/LI-3- Sca1 LOW(L)	250	25.591			25.62	28.605	26.048	24.717	25.893			26.205		27.045			23.151			25.698			25.405	28.516	25.852	24.453	26.394			26.045		26.375			23.427			26.268			25.998	28.526	26.106	25.004	26.013			26.599
d3-GM-CSF/LI-3- Sca1 HIGH (H)	251	21.847					22.118	20.8	21.641					23.452			22.962		24.641	21.782					22.629	20.837	21.869					23.048			23.86		24.508	21.866					22.518	21.339	21.512
d3-GM-CSF/LI-3- Sca1 HIGH (H)	252	23.57			25.253	26.46	21.08	22.233						24.41			23.846			23.252			25.65	26.764	20.904	22.43	29.302					24.653			23.642	29.171		23.411			25.166	22.047	21.139	22.424	29.444
d3-GM-CSF/LI-3- Sca1 HIGH (H)	253				24.517	22.621		20.53						23.167	22.428	22.914	19.265		25.304				24.62	22.901								22.46	22.414		18.387		25.918				24.419			19.676
d3-GM-CSF/LI-3- Sca1 HIGH (H)	254	20.571	28.665		27.88	23.3	19.986	21.887	23.005			21.99	24.973	21.163		27.01	27.316	28.072	22.903	20.503			28.033	23.574	19.814	21.831	23.189			21.757	25.275	21.352		27.443	27.441	28.528	23.112	20.546				23.559	20.081	22.504	22.763			21.765	24.093
d3-GM-CSF/LI-3- Sca1 HIGH (H)	255	24.118			26.458			24.789	23.847					26.442			23.645		24.321	24.14			25.388			25.015	24.2					26.494			23.446		24.216	24.071			25.545			25.548	24.301
d3-GM-CSF/LI-3- Sca1 HIGH (H)	256	23.902	26.511		24.746	25.296		21.608	21.159			24.177		22.565	23.721	28.483	21.505	28.196	23.626	24.083	26.368		25.117	25.144		21.411	22.01			23.956		22.572	24.236		21.337		23.78	24.384			25.357	25.289		21.5	22.12			23.988
d3-GM-CSF/LI-3- Sca1 HIGH (H)	257	20.91			25.331	23.219	20.344	20.276	24.491					22.628		26.622	27.193	27.299	24.689	21.025			24.869	23.835	20.386	20.293	23.969					22.511		25.883	27.302	26.866	24.389	20.827	28.436		24.864	23.231	20.515	20.642	24.342
d3-GM-CSF/LI-3- Sca1 HIGH (H)	258												28.559	29.352			23.46		27.201																23.114		27.038								29.286
d3-GM-CSF/LI-3- Sca1 HIGH (H)	259	24.018			25.065		24.185	21.778	24.344					24.013			23.316		25.684	23.767			24.452		24.678	21.974	24.441					23.599			23.122		25.222	23.736			25.12		24.384	22.405	24.36
d3-GM-CSF/LI-3- Sca1 HIGH (H)	260	20.876			24.946		19.927	21.095	25.379			23.78		21.339	24.77	24.541	22.855		25.585	20.973			25.314		19.887	21.356	25.401			23.649		21.205	25.219	25.772	22.902		25.23	21.1			24.635		19.761	21.279	25.71			23.79
d3-GM-CSF/LI-3- Sca1 HIGH (H)	261	24.321			22.259	24.543	24.205	19.1	22.739					23.294		24.717	22.279	26.854	24.205	23.696			22.586	24.529	24.767	21.21	23.322					23.338		24.636	22.399	26.916	23.666	24.545			22.273	24.952	24.377	21.145	22.874
d3-GM-CSF/LI-3- Sca1 HIGH (H)	262	23.4	25.529		22.247	23.377		21.102	22.228					21.931		23.402	22.041	29.138	24.822	22.961	25.576		22.311	22.93		21.071	22.363					21.708		23.231	22.1	29.807	25.121	23.498	25.285		22.189	23.629		21.219	22.482
d3-GM-CSF/LI-3- Sca1 HIGH (H)	263	24.038	21.209	25	22.081	24.375	27.479	22.37	21.906	25.976			23	21.991		22.262	21.208		22.963	23.606	21.359	25.598	22.045	24.359		22.347	22.091	26.051			23.338	22.093	28.399	22.203	21.402		23.095	24.174	21.323	25.695	22.451	24.626	27.471	22.351	21.986	25.402	27.069		22.703
d3-GM-CSF/LI-3- Sca1 HIGH (H)	264	25.981	19.973		26.206	25.184		22.145	21.684	27.708			23.187	22.379	26.436	26.819	21.207	27.85	24.194	26.094	19.943		26.719	25.006		22.155	21.562				23.373	22.454	26.291	26.307	21.272		24.857	25.369	20.022		25.793	25.303		22.281	21.695	27.085			23.192
d3-GM-CSF/LI-3- Sca1 HIGH (H)	265	24.711			24.162	25.018		22.317	23.525			26.891		22.835	26.624	26.816		26.933		24.437	29.438		24.408	25.31		22.205	23.711			26.764		22.961	26.498	26.451		27.538	27.868	24.83			23.958	25.189		22.403	23.196			27.053
d3-GM-CSF/LI-3- Sca1 HIGH (H)	266	22.629			27.508	26.387	20.632	23.435	24.725			26.051		22.675			23.807			23.045			26.538	27.082	20.833	23.476	24.918			25.74		23.144			24.072	27.458		22.654			26.561	26.888	20.702	23.563	24.314			25.912
d3-GM-CSF/LI-3- Sca1 HIGH (H)	267	23.394			26.612	28.48	23.068	24.132	26.56					25.709			26.393	28.451		23.221			26.918	27.982	22.815	23.351	27.258					25.795			27.08	28.106		23.612			26.787	27.327	22.883	23.5	26.115
d3-GM-CSF/LI-3- Sca1 HIGH (H)	268	25.521	20.183			26.346		24.455	23.385				27.1	24.523		26.352	23.564		26.733	25.12	20.306			26.128		24.333	23.715	28.978			26.875	24.846			23.402	28.306	26.015	25.787	20.076			26.218		24.196	23.527	28.311			26.687
d3-GM-CSF/LI-3- Sca1 HIGH (H)	269	24.623	24.478		24.809	25.975		26.669	21.71				25.821	23.362		24.262	20.366	28.171	24.283	24.849	24.102		25.572	26.432		27.192	21.911				25.176	23.656		24.29	20.382	28.805	24.121	24.765	24.056		24.969	25.236		26.556	21.741				24.977
d3-GM-CSF/LI-3- Sca1 HIGH (H)	270	22.979			26.09	27.279	20.962	22.617	24.461							27.551				22.595			26.34	26.756	20.844	22.75	24.291							27.111		29.014		22.879			29.181	27.1	20.766	22.269	24.462
d3-GM-CSF/LI-3- Sca1 HIGH (H)	271	25.926	20.879	26.056	23.724	24.906		26.14	21.193				22.654	22.808	26.872	22.925	23.185		23.506	26.401	20.841	25.61	23.589	24.859		27.607	21.205				22.356	23.256	26.875	22.656	22.96		23.088	26.424	20.868	25.976	23.799	24.725		26.059	21.329				22.306
d3-GM-CSF/LI-3- Sca1 HIGH (H)	272	24.989	22.309		22.661	26.38		26.326	22.45				23.095	22.887	26.505	25.691	21.642		23.797	24.827	22.811		23.05	26.007		24.699	21.874				23.753	23.088	26.261	25.153	21.366		24.582	25.373	22.949		22.941	26.42		25.311	22.244				23.285
d3-GM-CSF/LI-3- Sca1 HIGH (H)	273		23.174		25.969	27.736		24.98	23.817				25.025	22.661	27.646	28.061	21.661		26.686		23.452		25.654	27.443		24.195	24.059				25.004	22.491			21.793		27.076		23.385		25.953	27.164		24.361	23.835				25.203
d3-GM-CSF/LI-3- Sca1 HIGH (H)	274	22.245	26.778			26.917	21.22	22.347	26.486					26.758	26.847		26.124	26.812		22.654	26.606			26.202	21.093	22.407	26.396					26.805	26.837	26.665		27.538		22.664	27.742			26.285	21.108	22.299	29.078
d3-GM-CSF/LI-3- Sca1 HIGH (H)	275	22.634			24.976		20.715	23.247	24.983					24.424			28.288		25.192	22.848			25.197		20.332	23.408	24.956					24.734		28.681			25.201	22.704			24.704		20.328	23.693	24.909
d3-GM-CSF/LI-3- Sca1 HIGH (H)	276	23.41			23.753	23.116	24.682	23.066	21.015					22.183	24.854	26.181	19.704	28.221	25.228	23.465			24.16	22.942	24.912	23.234	21.607					22.264	24.755	26.194	19.755	28.09	25.624	23.35			23.686	22.701	24.716	24.512	21.56
d3-GM-CSF/LI-3- Sca1 HIGH (H)	277	20.212				23.131	19.732	21.897	22.612			21.542	23.389	20.93			28.172	26.881	22.122	19.943				22.936	19.784	20.649	21.545			21.135	23.839	20.908				27.077	22.49	19.85				20.504	18.826	19.707	20.461			20.6	23.471
d3-GM-CSF/LI-3- Sca1 HIGH (H)	278	21.157	25.867		26.023	24.291	21.944	22.149	23.652	28.213		23.627		22.461	26.775		20.528	28.689	22.822	21.191	25.545		25.411	23.949	21.755	21.668	23.25	28.285		23.414		22.407	26.452		20.407	28.374	22.795	21.173	25.963		25.618	22.819	21.418	21.959	22.966	28.025		23.541
d3-GM-CSF/LI-3- Sca1 HIGH (H)	279	23.579	28.125		23.158	26.487		22.186	25.897					24.335			20.908		25.465	23.546	27.623		22.95	26.42		22.307	26.02					24.379			20.965		25.101	23.82	27.69		22.913	26.851		22.694	26.086
d3-GM-CSF/LI-3- Sca1 HIGH (H)	280	24.481	29.422		24.354	24.702		24.965	22.387					23.375		26.124	20.633	29.088	23.409	24.52	29.324		24.49	24.784		25.005	22.715					23.207		27.105	20.62	29.573	23.412	24.505	28.224		24.345	24.418		25.161	22.627
d3-GM-CSF/LI-3- Sca1 HIGH (H)	281	22.847			23.297	25.967		20.014	21.597	26.957		25.565		21.949	21.753	24.776	20.091	27.28	26.418	22.586			23.221	25.621		20.072	21.772			25.681		22.407	21.914	24.648	20.092	27.995	27.054	22.633			23.546	25.955		20.172	21.724	26.991		25.531
d3-GM-CSF/LI-3- Sca1 HIGH (H)	282	20.779			23.035	23.514	21.968	21.955	22.348			21.042		22.467		25.753	21.496	26.251	25.386	20.743			23.03	23.65	22.134	21.86	22.675			20.955		22.478		25.458	21.222	25.989	25.116	20.95			23.45	23.932	22.066	21.845	22.471			20.822
d3-GM-CSF/LI-3- Sca1 HIGH (H)	283	22.508			27.636	25.968	21.71	24.803	22.376								22.783	28.761	28.481	22.555				25.036	21.43	24.669	22.538								22.856		28.35	22.544				25.262	21.789	24.614	22.629
d3-GM-CSF/LI-3- Sca1 HIGH (H)	284	21.351		23.196		23.23	21.098	21.016	23.274					24.722	24.262	28.796	23.495	28.413		21.262		23.283		23.317	20.847	21.083	23.294					24.861	24.266	28.805	23.326		28.449	21.484		23.368		23.492	21.074	21.131	23.013
d3-GM-CSF/LI-3- Sca1 HIGH (H)	285	22.246				24.508	19.869	20.903	23.772					22.454		25.336	24.196		25.163	22.095	29.592		29.277	24.278	19.683	21.192	24.414					22.574		25.614	24.253	28.057	24.833	22.263	29.581			24.749	19.766	20.954	24.037
d3-GM-CSF/LI-3- Sca1 HIGH (H)	286	22.982					21.663	23.363	23.716					23.648	23.679		24.069		24.982	22.754			29.408		21.482	23.393	23.779					23.458	23.698		24.091	29.394	24.807	22.795					21.622	23.621	23.763
d3-GM-CSF/LI-3- Sca1 HIGH (H)	287	26.982	22.147		25.795	27.21		23.753	23.142	27.629		28.684	24.873	23.426		23.356	23.421	27.287	24.561	26.627	22.29	28.489	25.259	26.693		24.215	23.353				24.633	23.698		23.795	23.782	27.524	24.688	26.652	22.152		25.531	26.19		24.862	23.308	27.601			26.546
d3-GM-CSF/LI-3- Sca1 HIGH (H)	288	27.418	20.407		26.396	26.223		24.998	23.178				24.203	23.138		27.068	21.65		26.431	26.782	20.866		26.703	25.813		24.231	23.102	28.653			24.517	22.912		27.849	22.043		27.021	27.043	20.719		26.746	26.213		24.189	23.536	28.281			24.537
d3-GM-CSF/LI-3- Sca1 HIGH (H)	289						24.218	25.606	26.299								25.013								24.203	25.157	26.65								24.758								24.456	25.497	26.378
d3-GM-CSF/LI-3- Sca1 HIGH (H)	290		26.474		26.824			25.201	23.811					24.058	27.479	24.06	22.549	28.528			26.028		26.88			24.475	24.39					23.694	27.519	24.233	22.668	27.509			25.832		26.821			24.934	23.732
d3-GM-CSF/LI-3- Sca1 HIGH (H)	291	24.918	26.489		26.003	25.912		23.665	24.386				25.387	22.792			21.706		26.736	25.546	26.608		25.915	26.096		23.752	24.189				25.754	22.943			21.496	29.262	26.947	25.28	26.502		26.448	25.65		24.433	24.123				25.928
d3-GM-CSF/LI-3- Sca1 HIGH (H)	292	24.379	23.818		24.922	27.436		24.591	22.593				26.186	23.433			21.765		27.396	24.575	23.904		25.176	27.87		24.5	23.014				26.853	23.601		28.838	21.58		27.61	24.571	23.904		24.935	27.82		24.995	22.922				26.002
d3-GM-CSF/LI-3- Sca1 HIGH (H)	293	24.235	28.592		24.655	27.695		23.182	23.039					23.574		26.794	21.696			24.217	28.648		25.4	27.857		23.605	23.263					23.162		26.107	21.866	28.48	26.241	24.605	27.865		24.492	27.981		23.308	23.544
d3-GM-CSF/LI-3- Sca1 HIGH (H)	294	25.015			24.69	28.37	26.911	22.851	24.953			26.219		23.018			23.719			24.544			24.907	27.891	26.351	22.788	25.114			26.342		23.166			23.341			24.954			24.75	28.286	26.436	23.097	25.355			25.889
d3-GM-CSF/LI-3- Sca1 HIGH (H)	295	26.317	22.073	26.793	25.271	24.552		23.575	21.715	27.349			22.969	22.565		24.607	22.438	27.941	25.218	26.896	22.283	26.783	25.377	24.957		23.791	22.474	27.34			23.542	23.014		24.727	22.618	27.86	25.205	26.395	22.105	26.461	25.688	24.98		24.06	22.292	27.969			23.105
d3-GM-CSF/LI-3- Sca1 HIGH (H)	296		23.157		25.286	25.896		25.341	22.598	27.508			25.926	24.077		25.724	21.365		25.877		23.442		24.798	25.777		25.267	22.077	27.508			25.014	23.796		24.54	21.096		25.222		23.232		24.819	25.458		24.814	21.866				25.977
d3-GM-CSF/LI-3- Sca1 HIGH (H)	297	22.146			27.84		21.133	24.227	27.657			25.298		24.789	28.296			28.242		22.278			27.274		21.183	23.326	27.214			25.508		24.357	27.874			28.062		22.338			27.614	28.376	20.96	23.031	27.051			25.761
d3-GM-CSF/LI-3- Sca1 HIGH (H)	298		22.275		26.484	26.26		24.121	23.024				26.099	23.223		24.342	20.908		24.862		22.114		27.045	26.867		23.108	22.714				26.324	23.183		23.832	20.596		24.849		22.141		27.697	26.887		23.591	22.968				25.948
d3-GM-CSF/LI-3- Sca1 HIGH (H)	299	22.73			27.609	26.488	20.733	23.536	24.826			26.152		22.776			23.908			23.146			26.639	27.183	20.934	23.577	25.019			25.841		23.245			24.173	27.559		22.755			26.662	26.989	20.803	23.664	24.415			26.013
d3-GM-CSF/LI-3- Sca1 HIGH (H)	300	27.083	22.248		25.896	27.311		23.854	23.243	27.73		28.785	24.974	23.527		23.457	23.522	27.388	24.662	26.728	22.391	28.59	25.36	26.794		24.316	23.454				24.734	23.799		23.896	23.883	27.625	24.789	26.753	22.253		25.632	26.291		24.963	23.409	27.702			26.647
d3-GM-CSF/LI-3- Sca1 EXTEREM HIGH (H')	301	23.208	23.851	26.042	24.399	25.832	21.679	21.85	22.39		27.03			26.342		24.091	23.244	25.516	26.317	23.25	23.994	26.093	24.192	25.693	21.618	21.554	22.72					26.032		23.812	23.843	25.807	26.43	23.906	23.959	25.825	24.439	25.424	21.416	22.285	22.421
d3-GM-CSF/LI-3- Sca1 EXTEREM HIGH (H')	302	23.988	25.798			27.212	23.594	22.433	23.912							28.421	22.184	28.646	28.204	24.228	25.39			26.26	23.532	22.625	23.698							28.061	21.975		28.341	23.776	25.913			26.507	23.403	22.52	24.483
d3-GM-CSF/LI-3- Sca1 EXTEREM HIGH (H')	303	24.036	27.379		25.406	24.468	22.008	22.478	23.815					25.231	26.316	27.357	24.127	28.44		23.908	27.715		25.491	24.46	22.071	22.562	23.67					25.993	26.411	27.743	24.134	28.993		23.877	27.792		25.563	24.582	22.613	22.929	24.232
d3-GM-CSF/LI-3- Sca1 EXTEREM HIGH (H')	304		24.657		23.526	24.628		21.988	22.759					22.536		23.384	21.743	27.291			24.865		23.677	24.922		21.934	22.84					22.834		22.961	21.217	27.498	27.105		24.618		23.372	25.088		22.679	23.203
d3-GM-CSF/LI-3- Sca1 EXTEREM HIGH (H')	305	25.914			24.352		25.292		25.045					24.19	26.945	25.724	23.758		27.331	26.021			24.688		26.597		25.662					23.989	26.536	25.387	23.848		27.42	26.316			24.39		26.479		25.781
d3-GM-CSF/LI-3- Sca1 EXTEREM HIGH (H')	306	23.879	26.205		25.448		21.222	23.816	24.521			24.504		23.271		26.605	25.242			23.223	26.195		25.42		20.815	23.63	24.72			24.455		23.283		26.058	25.695			23.465	26.075		25.608		21.26	24.031	24.73			24.025
d3-GM-CSF/LI-3- Sca1 EXTEREM HIGH (H')	307	22.852	23.013		21.876	23.729		19.934	22.053			24.978		21.393		22.788	21.545	24.922	27.621	23.173	23.14		21.604	23.847		19.927	22.17			24.211		21.308		23.233	21.569	24.828	27.466	23.277	23.445		21.805	23.844		20.434	22.375			24.152
d3-GM-CSF/LI-3- Sca1 EXTEREM HIGH (H')	308	24.148	24.981	25.139	27.641	25.609	21.959	23.763	23.498					24.245	23.454	25.373		26.214		23.936	25.616	25.538	27.436	25.26	21.947	23.934	23.588					24.218	23.667	26.456		26.744	27.713	24.06	25.431	25.35	27.573	25.675	21.915	24.605	23.386
d3-GM-CSF/LI-3- Sca1 EXTEREM HIGH (H')	309	25.811			24.249		25.189		24.942					24.087	26.842	25.621	23.655		27.228	25.918			24.585		26.494		25.559					23.886	26.433	25.284	23.745		27.317	26.213			24.287		26.376		25.678
d3-GM-CSF/LI-3- Sca1 EXTEREM HIGH (H')	310	22.759	27.734	25.779	24.519	24.79	21.816	21.131	23.194			25.575			26.795	26.584	25.047	27.775	24.612	22.913	27.085	26.207	24.261	24.9	21.694	21.282	23.284			25.064			26.327	27.34	24.11	27.795	24.63	22.707	27.127	26.377	24.615	24.801	21.77	21.901	23.502			25.304
d3-GM-CSF/LI-3- Sca1 EXTEREM HIGH (H')	311								23.929					26.863		25.916	26.169	28.868		26.328							24.847					26.444		26.586	25.949			26.896							24.573
d3-GM-CSF/LI-3- Sca1 EXTEREM HIGH (H')	312	26.318	27.927				22.907	26.651	24.086					25.702			24.312		27.388	25.912					23.193	25.73	23.447					26.408		26.82	23.93	28.849	27.374	25.71					22.514	25.752	22.514
d3-GM-CSF/LI-3- Sca1 EXTEREM HIGH (H')	313	23.096	27.034		25.211	25.887	23.99	22.632	22.011					23.706		23.898	21.75	26.886	27.397	23.064	27.028		25.606	25.481	24.112	22.594	22.442					23.13		24.314	21.781	27.431	27.037	23.068	27.382		25.918	25.561	24.003	22.747	22.461
d3-GM-CSF/LI-3- Sca1 EXTEREM HIGH (H')	314	23.726				27.063	23.025	24.532	23.552			25.57		25.17		26.098		29.089		23.712				27.353	23.025	24.733	24.222			25.533		25.31		26.484	27.123			23.644				27.508	23.002	25.49	23.995			25.383
d3-GM-CSF/LI-3- Sca1 EXTEREM HIGH (H')	315	21.524			24.017	25.03	19.543	21.426	24.665			26.05		22.748	28.188	25.08	24.733	25.733	26.984	21.611			24.321	25.068	19.644	21.522	23.918			26.218		22.49	27.21	25.004	24.33	26.119	27.525	21.722			24.323	24.975	19.728	22.153	23.806			26.648
d3-GM-CSF/LI-3- Sca1 EXTEREM HIGH (H')	316	23.06	26.261		24.563	26.121	22.82	24.1	23.005			26.899		23.02	26.034	24.861	23.257	27.093		23.301	26.565		23.816	26.936	22.459	24.23	23.044			25.709		22.877	26.05	24.648	23.534	27.147		23.199	26.981	28.185	23.438	26.458	22.708	24.65	23.31			26.224
d3-GM-CSF/LI-3- Sca1 EXTEREM HIGH (H')	317	22.084	27.37	26.561	24.72	25.493	21.807	20.816	22.772					24.175		24.911	23.943	27.923		22.271	27.012	25.241	25.281	25.3	21.731	20.736	23.233					24.294		24.573	23.728	27.128		22.062	27.021	26.149	24.635	25	21.964	21.155	23.162
d3-GM-CSF/LI-3- Sca1 EXTEREM HIGH (H')	318	22.72			26.254	24.256	24.479	24.762	24.112								24.994	29.735		22.576			25.136	24.674	23.688	24.223	24.111								24.723	29.336		23.177			25.935	24.83	24.255	25.296	24.325
d3-GM-CSF/LI-3- Sca1 EXTEREM HIGH (H')	319	22.67			24.856	25.311	22.632	22.664	24.274			22.941	25.011	22.364		24.389	22.978	27.088		22.718			24.582	25.508	22.022	22.659	24.78			22.975	25.422	22.648		23.755	23.851	27.78		22.662			24.638	25.827	22.349	22.68	25.622			22.609	25.604
d3-GM-CSF/LI-3- Sca1 EXTEREM HIGH (H')	320	23.887			23.988	26.014	23.936	22.379	23.24			26.258		24.101	26.117	25.422	23.567	26.051		23.776			23.786	25.698	23.75	22.051	23.252			26.815		24.097	26.706	25.393	23.51	26.273		24.354			24.034	25.862	24.074	22.887	23.511			26.108
d3-GM-CSF/LI-3- Sca1 EXTEREM HIGH (H')	321	22.858			26.379		19.809	21.907	24.72					25.818		26.339		25.509	26.967	23.133			25.51		19.794	21.03	22.319					26.208				26.719	26.405	22.89			25.214		19.539	21.319	23.537
d3-GM-CSF/LI-3- Sca1 EXTEREM HIGH (H')	322	22.587	26.146				19.957	22.364	24.368	27.231			25.055	24.113		26.448	23.043	27.023		22.507	27.425				19.636	21.977	24.165				25.651	24.046			23.441	27.403		22.507	26.802				19.752	22.043	24.223	27.052	27.29		25.39
d3-GM-CSF/LI-3- Sca1 EXTEREM HIGH (H')	323	22.189			24.634	25.515	20.094	22.49	23.218					24.276		26.486	23.015			21.974			24.76	24.854	20.1	22.426	24.002					24.916		26.185	23.524	29.438		22.065			25.045	25.242	19.863	22.829	23.514
d3-GM-CSF/LI-3- Sca1 EXTEREM HIGH (H')	324	20.722			23.47	23.926	20.061	20.903	21.951			21.131		20.837	25.16	24.978	20.344	24.875		20.888			23.036	23.396	19.941	20.969	22.429			20.917		20.767	25.163	25.009	20.383	25.575		20.808			22.98	23.685	20.007	20.961	22.44			20.867
d3-GM-CSF/LI-3- Sca1 EXTEREM HIGH (H')	325	24.395	25.805		26.135	25.719	23.15	22.304	22.771			26.402		26.113		25.332	24.391	27.81		25.01	25.868		25.473	26.033	23.873	21.934	22.544			26.25		25.2		24.787	24.243	28.285		25.452	26.68		25.254	25.24	23.245	22.728	22.629			25.693
d3-GM-CSF/LI-3- Sca1 EXTEREM HIGH (H')	326	22.76		25.709	25.939		23.431	24.793	23.868			26.033		23.285		25.418	25.428	27.798	26.359	22.928		25.952	25.385		23.36	24.298	24.936			26.572		23.342		24.613	25.631	28.162	26.488	22.907		25.918	25.258		23.598	24.806	24.254			26.34
d3-GM-CSF/LI-3- Sca1 EXTEREM HIGH (H')	327	24.604			25.781	24.748	23.598	21.23	23.167					23.057	26.85	25.318	21.825	28.539	27.157	24.919			25.495	24.675	23.523	21.32	23.524					23.422	25.672	25.775	21.631	28.166	26.387	24.641			25.456	23.976	23.553	21.492	23.712
d3-GM-CSF/LI-3- Sca1 EXTEREM HIGH (H')	328	27.219	25.64		25.482	25.023	22.235	23.176	23.839					26.421			24.399	27.351	28.848	26.973	26.213		25.308	25.023	22.03	23.327	24.183					26.377			25.143	28.138	28.217	26.139	25.362		25.405	25.922	22.22	23.257	23.904
d3-GM-CSF/LI-3- Sca1 EXTEREM HIGH (H')	329		27.862											25.926			25.911		26.807		26.902											25.5			25.293		26.986		26.314
d3-GM-CSF/LI-3- Sca1 EXTEREM HIGH (H')	330	24.595	25.222		25.508	26.166	20.991	24.055	24.558					25.298	26.554		26.138			24.857	25.922		25.529	26.283	21.171	23.512	24.612					25.428	26.139		25.827	27.045		24.368	25.824		26.055	26.536	21.079	24.393	24.88
d3-GM-CSF/LI-3- Sca1 EXTEREM HIGH (H')	331	24.903	24.851		23.986	25.725		22.127	24.566					22.822	25.709	23.564	22.907	26.19		25.147	24.864		24.341	25.283		22.033	24.929					23.177	25.506	23.514	22.992	26.708		24.153	25.316		23.936	25.959		22.325	25.189
d3-GM-CSF/LI-3- Sca1 EXTEREM HIGH (H')	332		26.88		25.131	27.384			26.704					27.349			23.937				26.358		25.546	27.26			26.771					27.486			24.44	29.537			26.957		24.898	27.405			26.279
d3-GM-CSF/LI-3- Sca1 EXTEREM HIGH (H')	333	23.97	26.238		23.299	25.71	25.771	22.469	22.272	26.252		25.341		23.025		22.907	21.694			24.199	26.494		23.34	25.734	25.457	22.301	22.729	26.179		25.395		23.811		22.625	21.591	29.062		24.173	26.218		22.933	25.537	25.941	23.722	22.506	25.987		25.397
d3-GM-CSF/LI-3- Sca1 EXTEREM HIGH (H')	334	24.518		25.787	24.615	24.785	21.568	22.022	22.691		27.73	26.306		25.121	25.103	24.842	23.878	27.579		24.001		25.211	25.49	24.76	21.379	22.273	23.681			26.216		25.075	24.835	24.948	23.933	27.809		24.72		25.564	24.813	25.304	21.832	22.677	23.388		27.813	26.235
d3-GM-CSF/LI-3- Sca1 EXTEREM HIGH (H')	335	24.492	25.119		25.405	26.063	20.888	23.952	24.455					25.195	26.451		26.035			24.754	25.819		25.426	26.18	21.068	23.409	24.509					25.325	26.036		25.724	26.942		24.265	25.721		25.952	26.433	20.976	24.29	24.777
d3-GM-CSF/LI-3- Sca1 EXTEREM HIGH (H')	336	22.749	26.764	23.524	24.71	25.446	21.689	21.369	22.423					23.898	26.353	23.236	23.633	25.782	25.941	22.981	26.915	23.755	25.359	25.759	21.521	21.596	22.866					24.238	26.726	23.485	23.391	25.508	25.836	22.961	26.881	23.678	25.489	24.987	21.583	22.095	23.081
d3-GM-CSF/LI-3- Sca1 EXTEREM HIGH (H')	337	27.963			27.99	26.596	25.435	25.247	27.858					24.555			24.368			28.894			27.889	26.562	24.722	26.156	27.944					24.522			24.936			28.158			27.086	26.907	24.831	26.583	28.019			29.231
d3-GM-CSF/LI-3- Sca1 EXTEREM HIGH (H')	338	22.949			23.963	24.765	20.495	21.157	23.239			26.363		23.614	25.104	24.893	23.43	26.951		22.858			23.488	24.847	20.407	21.274	22.729			26.725		24.079	25.621	24.921	23.572	28.256		22.392			23.437	25.209	20.673	21.681	23.335			27.119
d3-GM-CSF/LI-3- Sca1 EXTEREM HIGH (H')	339	23.858			24.569	26.436	21.601	22.355	22.813					23.859		25.14	22.737	26.763	26.725	24.066			24.669	26.933	21.547	22.645	22.854					24.323		24.865	22.906	26.113	27.286	23.658			24.917	27.026	21.709	22.728	22.884
d3-GM-CSF/LI-3- Sca1 EXTEREM HIGH (H')	340	23.036		26			20.32	23.982	22.913					24.142				26.747		22.876		26.505			20.347	23.692	23.052					24.097				26.626		22.623		26.517			20.291	23.87	22.956
d3-GM-CSF/LI-3- Sca1 EXTEREM HIGH (H')	341	23.42			23.499	25.309	23.757	20.863	22.422					22.078	28.212	23.364	21.943	25.001		22.922			23.391	24.81	23.774	20.932	22.782					22.209	28.199	23.177	21.592	25.448		23.257			23.129	24.763	23.668	20.969	22.638
d3-GM-CSF/LI-3- Sca1 EXTEREM HIGH (H')	342	22.115	27.464		24.065	26.065	22.09	22.764	22.845					23.698		24.597	23.415	26.88		21.872	27.734		24.108	25.428	21.995	22.646	23.018					23.294		25.013	24.01	26.723		21.773	27.221		23.382	25.842	22.066	22.899	22.788
d3-GM-CSF/LI-3- Sca1 EXTEREM HIGH (H')	343	23.41			23.381	24.75	21.312	23.546	22.656					25.183	26.802	26.638	23.286	28.032		23.872			23.609	24.301	21.047	24.002	22.874					24.537	25.992	27.267	24.958	28.87		23.365	28.69		23.518	24.369	21.628	23.677	22.771
d3-GM-CSF/LI-3- Sca1 EXTEREM HIGH (H')	344	22.346	24.631		24.032	24.842	21.254	21.151	22.4					23.433	23.471	24.007	22.481	26.853	26.903	22.211	24.634		24.393	24.601	21.137	21.733	23.081					23.663	22.943	24.189	22.454	26.311	26.524	22.433	24.8		24.046	25.131	21.47	21.758	23.027		30.831
d3-GM-CSF/LI-3- Sca1 EXTEREM HIGH (H')	345	22.133			24.475	23.704	21.6	21.967	23.43			23.861		22.002	23.521	24.593	24.095	27.406	29.193	22.21			24.669	24.556	21.625	21.812	23.859			23.874		22.024	23.752	23.869	24.453	27.201		22			24.335	23.983	21.748	22.745	23.984			23.921
d3-GM-CSF/LI-3- Sca1 EXTEREM HIGH (H')	346	23.01	26.772		21.538	24.466	22.68	19.348	21.529					22.072		24.351	24.496	26.49	26.873	23.762	26.886		21.327	24.117	22.346	19.901	22.07					22.148		25.696	24.861	27.668	26.456	23.381	26.014		21.31	24.922	22.632	19.777	22.302
d3-GM-CSF/LI-3- Sca1 EXTEREM HIGH (H')	347	21.976		24.98	26.48		19.67	20.949	22.937						25.755	27.247		26.903	26.68	21.788		25.592	26.31		19.805	21.254	23.629						26.131	26.738		26.618	26.141	21.77		25.135	26.446		20.057	21.558	23.098
d3-GM-CSF/LI-3- Sca1 EXTEREM HIGH (H')	348		27.151					26.037				29.007		25.635							26.354					26.177				29.105		25.521							26.444					26.623				28.802
d3-GM-CSF/LI-3- Sca1 EXTEREM HIGH (H')	349	25.043	25.27		23.875	24.805	26.795	22.288	22.502					27.76	26.866	24.142	24.057	28.011		25.19	26.321		24.068	25.574	25.554	22.645	22.999					28.542	26.168	24.256	23.9	27.885		24.924	25.779		24.163	25.229	25.863	23.133	22.575
d3-GM-CSF/LI-3- Sca1 EXTEREM HIGH (H')	350	25.649			25.25			26.54						24.87			26.181			25.991			25.47			26.089						24.903			26.194			25.925			25.364			25.98
d6-GM-CSF/LI-3- Sca1 LOW (L)	351	26.61				29.68	24.239		26.096			25.395					27.345	27.586		26.487					24.982		26.148			24.978					28.02	27.199		26.52					24.137		26.027			24.739
d6-GM-CSF/LI-3- Sca1 LOW (L)	352	23.336				28.307	23.366	25.349	27.19			25.196		28.481			26.268			23.363			28.134	28.036	23.595	25.209	26.238			25.369					26.941			23.301			27.695	28.261	23.187	25.091	26.112			25.564
d6-GM-CSF/LI-3- Sca1 LOW (L)	353	21.474		26.291	25.048	24.703	22.49	24.393	25.448			21.92		23.639			24.412	28.395		21.515		27.097	25.842	24.839	22.796	24.387	26.006			22.105		23.517			24.413	28.493		21.414		26.332	25.827	25.175	22.662	24.748	26.212			21.71
d6-GM-CSF/LI-3- Sca1 LOW (L)	354	26.17			25.798		25.886		26.244			25.218		27.165			24.235			26.613			25.634		26.639	26.928	27.244			25.631					24.017			26.295			25.935		26.973	26.897	27.123			25.303
d6-GM-CSF/LI-3- Sca1 LOW (L)	355	23.333				28.494	23.603	25.023	25.869			23.687		24.359			23.934	27.708		23.264				27.804	23.744	24.571	25.488			23.011		24.101			24.215	28.09	28.798	23.357				28.321	23.766	25.578	25.472			22.976
d6-GM-CSF/LI-3- Sca1 LOW (L)	356	26.121					23.75													26.449					23.888					28.431								25.766					23.503
d6-GM-CSF/LI-3- Sca1 LOW (L)	357	25.277			26.679	26.747	22.334	23.108	25.703			22.355		23.292				28.657	27.235	24.673			26.523	26.942	22.27	23.341	26.44			22.267		23.142				28.407	27.096	24.784			26.5	26.044	22.923	23.402	25.607			22.272
d6-GM-CSF/LI-3- Sca1 LOW (L)	358	25.063			26.631		22.716	26.854	25.077					25.586			26.294	28.848		24.521			26.528		22.96	26.253	25.961					25.775			26.627			24.36			26.351		22.978	26.478	25.477
d6-GM-CSF/LI-3- Sca1 LOW (L)	359	23.265				29.065	21.912	24.75	27.16					27.303	28.241		26.249		27.886	23.855				29.189	22.275	24.839						27.602			25.924	28.437	28.193	23.721					21.793	24.34	27.006
d6-GM-CSF/LI-3- Sca1 LOW (L)	360	20.989			25.59	25.802	21.817	22.861	24.821			21.492		21.957			23.103	25.817		21.027			25.653	25.442	22.094	23.069	24.269			21.525		22.19			23.524	26.517		21.278			25.653	25.072	22.007	23.197	24.699			21.411
d6-GM-CSF/LI-3- Sca1 LOW (L)	361	21.459			26.311	26.864	22.545	23.547	27.692			22.55		23.737			24.105	28.139		21.458			26.138	26.368	22.215	23.445				22.416		23.96			24.365	27.425		21.503			25.757	26.688	22.448	24.115	28.259			22.47
d6-GM-CSF/LI-3- Sca1 LOW (L)	362	26.55							28.864					26.211					27.637	26.733												26.955			27.889		27.511	27.275										28.453
d6-GM-CSF/LI-3- Sca1 LOW (L)	363	24.2				26.289		25.458				24.952		23.909			24.742			24.182				26.187	28.335	25.571	26.117			25.231		23.504			24.612	29.08		24.312				26.288	28.364	25.073	26.559			25.222
d6-GM-CSF/LI-3- Sca1 LOW (L)	364	22.466			27.931	24.504	22.574	23.473				23.822		22.236	26.27		24.193	28.738		22.349			27.775	24.841	22.687	23.197		28.717		24.041		22.148	26.088		24.354	28.432		22.212			27.658	24.21	22.59	23.6				24.335
d6-GM-CSF/LI-3- Sca1 LOW (L)	365	25.902			25.53		25.618		25.976			24.95		26.897			24.469			26.345			25.366		26.371	26.66	26.976			25.363		26.656			24.274			26.027			25.667		26.705	26.629	26.855			25.035
d6-GM-CSF/LI-3- Sca1 LOW (L)	366	24.661					24.08	25.681				25.981		26.272			24.325			24.963				27.819	23.93	26.03				26.111		26.449			24.412			24.728				28.115	24.199	25.272				26.901
d6-GM-CSF/LI-3- Sca1 LOW (L)	367	21.007			25.592	24.131	23.07	23.217				24.409		23.819			25.251	28.034		21.629			25.688	24.628	22.981	21.856				24.092		23.679			24.5	28.66		21.854			26.043	24.018	22.604	22.661				23.912
d6-GM-CSF/LI-3- Sca1 LOW (L)	368	20.629	28.935		25.038	26.084	20.803	24.015	23.937			22.059		23.283			23.939			20.635	29.307		25.583	26.026	20.892	24.32	24.815			22.001		24.118			24.231	28.746		20.716			25.729	26.366	20.651	23.882	24.715			22.002
d6-GM-CSF/LI-3- Sca1 LOW (L)	369	21.284			25.869	24.408	23.347	23.494				24.686		24.096			25.528	28.311		21.906			25.965	24.905	23.258	22.133				24.369		23.956			24.777	28.937		22.131			26.32	24.295	22.881	22.938				24.189
d6-GM-CSF/LI-3- Sca1 LOW (L)	370	22.161			28.175	27.028	25.271	23.705	26.421			26.002		23.941			24.361	28.802	28.455	21.955			28.058	27.035	24.862	23.61	27.999			24.807		24.151			25.23		28.477	21.94			27.527	27.233	25.321	23.786	27.13			25.48
d6-GM-CSF/LI-3- Sca1 LOW (L)	371	23.21			26.51	26.553	23.96	27.241	24.866			23.159		24.389			24.945		27.934	23.723		26.634	26.718	26.78	23.171	27.552	25.525			23.284		24.568	29.177		25.409		27.94	23.669		26.45	25.805	26.084	23.814	27.305	25.568			22.843	29.498
d6-GM-CSF/LI-3- Sca1 LOW (L)	372	22.893		27.414	25.812	26.885	22.055	23.244	24.073		29.387	24.827		23.815			25.358			22.524		27.154	25.576	26.823	21.87	23.632	24.016			24.931		24.578			25.063		28.404	22.786		26.345	26.065	26.825	22.169	23.013	23.975			25.042
d6-GM-CSF/LI-3- Sca1 LOW (L)	373	21.228			25.104	26.129	24.432	23.811	26.221			21.278		22.522		29.94	23.147	26.279		21.359			24.818	25.734	24.648	24.25	26.111			21.115		22.511			23.156	26.402		21.428		29.25	25.863	25.629	23.979	24.141	25.879			21.117
d6-GM-CSF/LI-3- Sca1 LOW (L)	374	24.783	29.839		25.807	26.413		23.412	24.568					23.753			21.195	27.495	27.278	25.051			25.421	26.741		24.08	23.786					23.812	28.365	29.817	21.578	27.99	27.598	25.251	29.55		24.026	26.301		23.763	24.043
d6-GM-CSF/LI-3- Sca1 LOW (L)	375	24.334				26.423		25.592				25.086		24.043			24.169			24.316				26.321	28.469	25.705	26.251			25.365		23.638			24.213	29.214		24.446				26.422	28.498	25.207	26.693			25.356
d6-GM-CSF/LI-3- Sca1 LOW (L)	376	26.693							29.007					26.354					27.78	26.876												27.098			28.032		27.654	27.418										28.596
d6-GM-CSF/LI-3- Sca1 LOW (L)	377	21.362			25.238	26.263	24.566	23.945	26.355			21.412		22.656			23.281	26.413	29.174	21.493			24.952	25.868	24.782	24.384	26.245			21.249		22.645			23.29	26.536		21.562			25.997	25.763	24.113	24.275	26.013			21.251
d6-GM-CSF/LI-3- Sca1 LOW (L)	378	26.255					23.884													26.583					24.022					28.565								25.9					23.637
d6-GM-CSF/LI-3- Sca1 LOW (L)	379	24.527					23.946	25.547				25.847		26.138				29.2		24.829				27.685	23.796	25.896				25.977		26.315			28.076			24.594				27.981	24.065	25.138				26.767
d6-GM-CSF/LI-3- Sca1 LOW (L)	380	23.344			26.644	26.687	24.094	27.375	25			23.293		24.523			25.079		28.068	23.857			26.852	26.914	23.305	27.686	25.659			23.418		24.702			25.543	29.314	28.074	23.803			25.939	26.218	23.948	27.439	25.702			22.977
d6-GM-CSF/LI-3- Sca1 LOW (L)	381	26.476				29.546	24.105	29.143	25.962			25.261					27.211	27.452		26.353				29.217	24.848	29.954	26.014			24.844					27.886	27.065		26.386				29.09	24.003	29.313	25.893			24.605
d6-GM-CSF/LI-3- Sca1 LOW (L)	382	25.197			26.765		22.85	26.988	25.211					25.72			26.428	28.982		24.655			26.662		23.094	26.387	26.095					25.909			26.761		29.313	24.494			26.485		23.112	26.612	25.611
d6-GM-CSF/LI-3- Sca1 LOW (L)	383	22.882		27.403	25.801	26.874	22.044	23.233	24.062			24.816		23.804			25.347	29.736	29.242	22.513		27.143	25.565	26.812	21.859	23.621	24.005			24.92		24.567			25.052	30.299	28.393	22.775		26.334	26.054	26.814	22.158	23.002	23.964			25.031
d6-GM-CSF/LI-3- Sca1 LOW (L)	384	21.132			25.733	25.945	21.96	23.004	24.964			21.635		22.1			23.232	25.96		21.17			25.796	25.585	22.237	23.212	24.412			21.668		22.333			23.489	26.66		21.421			25.796	25.215	22.15	23.34	24.842			21.554
d6-GM-CSF/LI-3- Sca1 LOW (L)	385	24.64	29.696		25.664	26.27		23.269	24.425					23.61		28.904	21.052	27.352	27.135	24.908			25.278	26.598		23.937	23.643					23.669		29.674	21.435	27.847	27.455	25.108	29.407		23.883	26.158		23.62	23.9
d6-GM-CSF/LI-3- Sca1 LOW (L)	386	20.772			25.181	26.227	20.946	24.158	24.08			22.202		23.426			23.36	29.309		20.778	29.45		25.726	26.169	21.035	24.463	24.958			22.144		24.261			23.853	28.889		20.859			25.872	26.509	20.794	24.025	24.858			22.145
d6-GM-CSF/LI-3- Sca1 LOW (L)	387	26.036			25.664		25.752		26.11			25.084		27.031			24.423	29.971		26.479			25.5		26.505	26.794	27.11			25.497		26.79			24.651			26.161			25.801		26.839	26.763	26.989			25.169
d6-GM-CSF/LI-3- Sca1 LOW (L)	388	21.15			25.735	24.274	23.213	23.36				24.552		23.962			25.394	28.177		21.772			25.831	24.771	23.124	21.999				24.235		23.822			24.643	28.803		21.997			26.186	24.161	22.747	22.804				24.055
d6-GM-CSF/LI-3- Sca1 LOW (L)	389	22.027			28.041	26.894	25.137	23.571	26.287			25.868		23.807			24.227	28.668	28.321	21.821			27.924	26.901	24.728	23.476	27.865			24.673		24.017			25.096	29.031	28.343	21.806			27.393	27.099	25.187	23.652	26.996			25.346
d6-GM-CSF/LI-3- Sca1 LOW (L)	390	23.202				28.173	23.232	25.215	27.056			25.062		28.347			26.134	29.174		23.229			28	27.902	23.461	25.075	26.104			25.235		28.96			26.807	29.026		23.167			27.561	28.127	23.053	24.957	25.978			25.43
d6-GM-CSF/LI-3- Sca1 LOW (L)	391	23.199				28.36	23.469	24.889	25.735			23.553		24.225			23.777	27.574		23.13				27.67	23.61	24.437	25.354			22.877		23.967			24.007	27.956	28.664	23.223				28.187	23.632	25.444	25.338			22.842
d6-GM-CSF/LI-3- Sca1 LOW (L)	392	21.316			26.168	26.721	22.402	23.404	27.549			22.407		23.594			24.569	27.996		21.315			25.995	26.225	22.072	23.302				22.273		23.817			24.944	27.282		21.36			25.614	26.545	22.305	23.972	28.116			22.327
d6-GM-CSF/LI-3- Sca1 LOW (L)	393	22.332			27.797	24.37	22.44	23.339				23.688		22.102	26.136		24.839	28.604		22.215			27.641	24.707	22.553	23.063		28.583		23.907		22.014	25.954		24.707	28.298		22.078			27.524	24.076	22.456	23.466				24.201
d6-GM-CSF/LI-3- Sca1 LOW (L)	394	20.393		26.892	26.674	23.923	22.323	26.419	23.585			22.32		21.583			22.397	25.345		20.588		26.336	26.72	24.246	22.307	25.979	23.65			22.35		21.306	28.873		22.571	25.879		20.424		26.083	26.149	23.78	21.862	26.345	23.75			22.543
d6-GM-CSF/LI-3- Sca1 LOW (L)	395	21.34		26.157	24.914	24.569	22.356	24.259	25.314			21.786		23.505			24.071	28.261		21.381		26.963	25.708	24.705	22.662	24.253	25.872			21.971		23.383			23.567	28.359		21.28		26.198	25.693	25.041	22.528	24.614	26.078			21.576
d6-GM-CSF/LI-3- Sca1 LOW (L)	396	22.653				24.906	24.074	24.854	23.864			24.74		23.225		29.851	25.56	28.747	28.254	22.701				25.202	24.876	24.55	24.163			24.673		22.944		28.725	25.826	28.713	27.063	22.617				25.414	24.379	25.089	24.148			24.77
d6-GM-CSF/LI-3- Sca1 LOW (L)	397	23.399				29.199	22.046	24.884	27.294					27.437	28.375		26.383		28.02	23.989				29.323	22.409	24.973						27.736			26.058	28.571	28.327	23.855				29.439	21.927	24.474	27.14
d6-GM-CSF/LI-3- Sca1 LOW (L)	398	25.411			26.813	26.881	22.468	23.242	25.837			22.489		23.426				28.791	27.369	24.807			26.657	27.076	22.404	23.475	26.574			22.401		23.276				28.541	27.23	24.918			26.634	26.178	23.057	23.536	25.741			22.406
d6-GM-CSF/LI-3- Sca1 LOW (L)	399	20.669			25.078	26.124	20.843	24.055	23.977			22.099		23.323			23.257	29.206		20.675	29.347		25.623	26.066	20.932	24.36	24.855			22.041		24.158			23.75	28.786		20.756			25.769	26.406	20.691	23.922	24.755			22.042
d6-GM-CSF/LI-3- Sca1 LOW (L)	400	26.152					23.781													26.48					23.919					28.462								25.797					23.534
d6-GM-CSF/LI-3- Sca1 MID (M)	401	20.939	27.632		23.844	25.786	23.225	23.611	23.2			22.014		21.529		28.533	22.597	26.656		20.97	28.483		23.725	25.51	22.875	23.185	23.613			21.96		21.426		27.968	23.564	26.778		20.639	28.293		23.66	25.206	22.79	23.557	23.361			22.045
d6-GM-CSF/LI-3- Sca1 MID (M)	402				26.793			24.86	23.665					25.263			23.269		27.101				27.117			24.428	23.285					25.569			21.808		26.096				27.014			24.321	23.365
d6-GM-CSF/LI-3- Sca1 MID (M)	403				24.776	27.096		23.115	22.761					24.177			20.004	29.91	26.357				25.297	27.344		23.289	22.834					24.248			20.198	29.546	26.437				24.927	26.512		22.922	22.444
d6-GM-CSF/LI-3- Sca1 MID (M)	404	21.166			24.249	24.212	25.337	24.254	23.375			21.681		22.175		29.313	23.041	28.912	28.614	21.23			24.042	24.298	25.445	24.183	23.615			21.472		22.021		28.971	23.055			21.033			24.313	24.604	25.62	24.378	23.443			21.59
d6-GM-CSF/LI-3- Sca1 MID (M)	405	23.103			27.422	25.942	26.561	25.259	23.97			24.602		22.672			24.571	28.15		23.04			26.693	26.472	26.026	24.892	24.204			23.862		23.265			24.152	28.917		23.434			27.011	25.895	26.025	24.829	24.33			24.588
d6-GM-CSF/LI-3- Sca1 MID (M)	406	24.341					21.71	26.199												23.489				27.407	21.952	25.572												23.59				27.143	21.565	25.741
d6-GM-CSF/LI-3- Sca1 MID (M)	407	22.441			27.498	27.229	23.928	24.474	26.009			24.773		24.14	28.29		24.268	27.552		22.047			26.785	26.813	23.193	24.138	26.959			24.386		24.037	28.487		24.185	27.91		22.478			27.015	27.651	23.416	24.367	26.053			24.476
d6-GM-CSF/LI-3- Sca1 MID (M)	408	22.467			26.66	28.235	22.837	24.71	25.118			25.377		26.351			26.423	29.17	28.349	22.361			26.487	28.219	22.791	25.822	24.88			25.681		25.846			25.677	29.152	28.203	22.335			26.107	27.782	22.773	25.732	24.703			25.485
d6-GM-CSF/LI-3- Sca1 MID (M)	409	27.285					26.574	27.472				27.536								26.841					26.701					27.557								26.967					26.286	27.928				27.553
d6-GM-CSF/LI-3- Sca1 MID (M)	410	24.489			25.691	26.311	26.794	24.225	26.661					28.91			25.011	29.079		24.624			25.612	26.134	27.093	24.584	26.046					28.86			25.856	29.189	29.194	24.547			25.956	25.853	26.935	24.221	26.015
d6-GM-CSF/LI-3- Sca1 MID (M)	411	23.076		27.391	26.996	26.984	22.025	23.49	24.612			24.001		23.868	26.97		24.418			23.071		26.804	27.125	27.274	22.004	23.581	25.137			23.419		23.552	26.929		24.469			22.86		27.295	27.266	26.28	22.094	23.472	25.102			23.224
d6-GM-CSF/LI-3- Sca1 MID (M)	412	23.711				25.513	23.683	23.686	24.602			25.664		25.024	27.491		22.929	29.682		24.058				25.746	23.839	24.271	24.885			25.286		25.948	28.272		23.4	29.038		24.191				25.331	23.82	24.342	24.266			25.553
d6-GM-CSF/LI-3- Sca1 MID (M)	413	24.484			25.686	26.306	26.789	24.22	26.656					28.905			25.006	29.074		24.619			25.607	26.129	27.088	24.579	26.041					28.855			25.851	29.184	29.189	24.542			25.951	25.848	26.93	24.216	26.01
d6-GM-CSF/LI-3- Sca1 MID (M)	414	22.785					25.365	23.874	26.074			23.881		22.475		27.563	23.464	28.055	29.647	22.726		28.121	26.308	25.671	25.441	23.808	26.053			23.979		23.076		27.14	23.731	28.632	29.954	23.076		27.771	26.16	25.904	24.901	23.827	25.989			24.173
d6-GM-CSF/LI-3- Sca1 MID (M)	415	21.896			26.351	26.847	22.69	24.406	25.614			21.538		22.069			27.933	27.162		22.046			26.554	27.068	22.61	23.953	25.85			21.756		22.214			27.023	27.766		21.975				27.544	23.06	24.543	26.273			21.849
d6-GM-CSF/LI-3- Sca1 MID (M)	416	22.712			26.561		20.818	27.064	26.877					25.31			26.482			22.277			26.372		20.741	27.491	27.017					24.69			25.774	28.486		22.477			26.303		20.925	27.489	27.002
d6-GM-CSF/LI-3- Sca1 MID (M)	417				24.296	25.236		26.113	26.345					25.193			24.016		28.598				24.959	25.174		26.05	27.726					25.647			24.175	28.053					24.122	25.739		26.192	26.914
d6-GM-CSF/LI-3- Sca1 MID (M)	418	25.074	27.48	24.907	23.974	26.599	26.545	24.207	25.15					23.699			22.654	27.769		25.132	26.732	24.63	24.586	27.018	26.051	24.295	25.174					23.622		29.187	22.169	27.878	28.6	24.873	27.046	24.873	23.783	26.913	26.563	23.988	24.832
d6-GM-CSF/LI-3- Sca1 MID (M)	419	22.404			25.718	25.309	23.2	25.356	25.439			22.115		22.462	28.328		24.979	26.72		22.607			26.521	25.468	23.191	26.597	25.321			22.081		22.59	29.491		24.956	26.634		22.574			25.863	24.945	23.421	25.255	25.179			22.135
d6-GM-CSF/LI-3- Sca1 MID (M)	420	27.88			23.736	26.864		23.763	23.777			25.99		24.392			23.004	28.911		27.543			23.699	26.684		23.347	23.774			25.792		23.803			23.238	28.924		27.93			23.568	27.227		23.269	23.665			25.773
d6-GM-CSF/LI-3- Sca1 MID (M)	421	23.527	28.222	26.215			22.805	25.186	25.432			24.19		23.925			24.551	27.652		23.416		26.477			23.055	25.01	25.317			24.493		23.628			24.789	27.756	29.6	23.572		26.45			22.608	24.761	25.544			25.301
d6-GM-CSF/LI-3- Sca1 MID (M)	422	23.098			27.417	25.937	26.556	25.254	23.965			24.597		22.667			24.566	28.145		23.035			26.688	26.467	26.021	24.887	24.199			23.857		23.26			24.147	28.912		23.429			27.006	25.89	26.02	24.824	24.325			24.583
d6-GM-CSF/LI-3- Sca1 MID (M)	423	21.9			26.355	26.851	22.694	24.41	25.618			21.542		22.073			27.937	27.166		22.05			26.558	27.072	22.614	23.957	25.854			21.76		22.218			27.027	27.77		21.979				27.548	23.064	24.547	26.277			21.853
d6-GM-CSF/LI-3- Sca1 MID (M)	424				24.781	27.101		23.12	22.766					24.182			20.009	29.915	26.362				25.302	27.349		23.294	22.839					24.253			20.203	29.551	26.442				24.932	26.517		22.927	22.449
d6-GM-CSF/LI-3- Sca1 MID (M)	425	24.484			25.686	26.306	26.789	24.22	26.656					28.905			25.006	29.074		24.619			25.607	26.129	27.088	24.579	26.041					28.855			25.851	29.184	29.189	24.542			25.951	25.848	26.93	24.216	26.01
d6-GM-CSF/LI-3- Sca1 MID (M)	426	25.065	27.471	24.898	23.965	26.59	26.536	24.198	25.141					23.69			22.645	27.76		25.123	26.723	24.621	24.577	27.009	26.042	24.286	25.165					23.613			22.16	27.869	28.591	24.864	27.037	24.864	23.774	26.904	26.554	23.979	24.823
d6-GM-CSF/LI-3- Sca1 MID (M)	427	22.615			25.929	25.52	23.411	25.567	25.65			22.326		22.673	28.539		25.19	26.931		22.818			26.732	25.679	23.402	26.808	25.532			22.292		22.801			25.167	26.845		22.785			26.074	25.156	23.632	25.466	25.39			22.346
d6-GM-CSF/LI-3- Sca1 MID (M)	428	28.091			23.947	27.075		23.974	23.988			26.201		24.603			23.215			27.754			23.91	26.895		23.558	23.985			26.003		24.014			23.449			28.141			23.779	27.438		23.48	23.876			25.984
d6-GM-CSF/LI-3- Sca1 MID (M)	429	23.738	28.433	26.426			23.016	25.397	25.643			24.401		24.136			24.762	27.863		23.627		26.688			23.266	25.221	25.528			24.704		23.839			25	27.967	29.811	23.783		26.661			22.819	24.972	25.755			25.512
d6-GM-CSF/LI-3- Sca1 MID (M)	430	22.887			27.206	25.726	26.345	25.043	23.754			24.386		22.456			24.355	27.934		22.824			26.477	26.256	25.81	24.676	23.988			23.646		23.049			23.936	28.701		23.218			26.795	25.679	25.809	24.613	24.114			24.372
d6-GM-CSF/LI-3- Sca1 MID (M)	431	21.689			26.144	26.64	22.483	24.199	25.407			21.331		21.862			27.726	26.955		21.839			26.347	26.861	22.403	23.746	25.643			21.549		22.007			26.816	27.559		21.768				27.337	22.853	24.336	26.066			21.642
d6-GM-CSF/LI-3- Sca1 MID (M)	432				24.57	26.89		22.909	22.555					23.971			19.798		26.151				25.091	27.138		23.083	22.628					24.042			19.992		26.231				24.721	26.306		22.716	22.238
d6-GM-CSF/LI-3- Sca1 MID (M)	433	24.382			25.584	26.204	26.687	24.118	26.554					28.803			24.904	28.972		24.517			25.505	26.027	26.986	24.477	25.939					28.753			25.749			24.44			25.849	25.746	26.828	24.114	25.908
d6-GM-CSF/LI-3- Sca1 MID (M)	434	21.081	27.774		23.986	25.928	23.367	23.753	23.342			22.156		21.671		28.675	22.739	26.798		21.112	28.625		23.867	25.652	23.017	23.327	23.755			22.102		21.568		28.11	23.706	26.92		20.781	28.435		23.802	25.348	22.932	23.699	23.503			22.187
d6-GM-CSF/LI-3- Sca1 MID (M)	435				26.935			25.002	23.807					25.405			23.411		27.243				27.259			24.57	23.427					25.711			21.95		26.238				27.156			24.463	23.507
d6-GM-CSF/LI-3- Sca1 MID (M)	436				24.918	27.238		23.257	22.903					24.319			20.146		26.499				25.439	27.486		23.431	22.976					24.39			20.34		26.579				25.069	26.654		23.064	22.586
d6-GM-CSF/LI-3- Sca1 MID (M)	437	21.024			24.107	24.07	25.195	24.112	23.233			21.539		22.033			22.899	28.77	28.472	21.088			23.9	24.156	25.303	24.041	23.473			21.33		21.879		28.829	22.913			20.891			24.171	24.462	25.478	24.236	23.301			21.448
d6-GM-CSF/LI-3- Sca1 MID (M)	438	22.961			27.28	25.8	26.419	25.117	23.828			24.46		22.53			24.429	28.008		22.898			26.551	26.33	25.884	24.75	24.062			23.72		23.123			24.01	28.775		23.292			26.869	25.753	25.883	24.687	24.188			24.446
d6-GM-CSF/LI-3- Sca1 MID (M)	439	24.199					21.568	26.057												23.347				27.265	21.81	25.43												23.448				27.001	21.423	25.599
d6-GM-CSF/LI-3- Sca1 MID (M)	440	22.547			27.604	27.335	24.034	24.58	26.115			24.879		24.246	28.396		24.374	27.658		22.153			26.891	26.919	23.299	24.244	27.065			24.492		24.143	28.593		24.291	28.016		22.584			27.121	27.757	23.522	24.473	26.159			24.582
d6-GM-CSF/LI-3- Sca1 MID (M)	441	21.905			26.36	26.856	22.699	24.415	25.623			21.547		22.078			27.942	27.171		22.055			26.563	27.077	22.619	23.962	25.859			21.765		22.223			27.032	27.775		21.984				27.553	23.069	24.552	26.282			21.858
d6-GM-CSF/LI-3- Sca1 MID (M)	442	22.703			26.552		20.809	27.055	26.868					25.301			26.473			22.268			26.363		20.732	27.482	27.008					24.681			25.765	28.477		22.468			26.294		20.916	27.48	26.993
d6-GM-CSF/LI-3- Sca1 MID (M)	443				24.287	25.227		26.104	26.336					25.184			24.007		28.589				24.95	25.165		26.041	27.717					25.638			24.166	28.044					24.113	25.73		26.183	26.905
d6-GM-CSF/LI-3- Sca1 MID (M)	444	24.383			25.585	26.205	26.688	24.119	26.555					28.804			24.905	28.973		24.518			25.506	26.028	26.987	24.478	25.94					28.754			25.75			24.441			25.85	25.747	26.829	24.115	25.909
d6-GM-CSF/LI-3- Sca1 MID (M)	445	22.97		27.285	26.89	26.878	21.919	23.384	24.506			23.895		23.762	26.864		24.312			22.965		26.698	27.019	27.168	21.898	23.475	25.031			23.313		23.446	26.823		24.363			22.754		27.189	27.16	26.174	21.988	23.366	24.996			23.118
d6-GM-CSF/LI-3- Sca1 MID (M)	446	23.605				25.407	23.577	23.58	24.496			25.558		24.918	27.385		22.823			23.952				25.64	23.733	24.165	24.779			25.18		25.842	28.166		23.294	28.932		24.085				25.225	23.714	24.236	24.16			25.447
d6-GM-CSF/LI-3- Sca1 MID (M)	447	24.493			25.695	26.315	26.798	24.229	26.665					28.914			25.015			24.628			25.616	26.138	27.097	24.588	26.05					28.864			25.86			24.551			25.96	25.857	26.939	24.225	26.019
d6-GM-CSF/LI-3- Sca1 MID (M)	448	22.794					25.374	23.883	26.083			23.89		22.484		27.572	23.473	28.064		22.735		28.13	26.317	25.68	25.45	23.817	26.062			23.988		23.085		27.149	23.74	28.641		23.085		27.78	26.169	25.913	24.91	23.836	25.998			24.182
d6-GM-CSF/LI-3- Sca1 MID (M)	449	22.573			26.766	28.341	22.943	24.816	25.224			25.483		26.457			26.529		28.455	22.467			26.593	28.325	22.897	25.928	24.986			25.787		25.952			25.783		28.309	22.441			26.213	27.888	22.879	25.838	24.809			25.591
d6-GM-CSF/LI-3- Sca1 MID (M)	450	27.391					26.68	27.578				27.642								26.947					26.807					27.663								27.073					26.392	28.034				27.659
d6-GM-CSF/LI-3- Sca1 HIGH (H)	451	24.837			24.892	25.853	24.243	22.746	25.199					23.645			24.008	27.984		24.482			24.324	25.324	24.168	22.797	25.642					23.898			23.794	27.269		24.5			24.924	25.19	23.596	22.749	25.031
d6-GM-CSF/LI-3- Sca1 HIGH (H)	452	25.062			25.942	29.371		25.838	25.966					24.063			23.17	28.432		25.137	29.534		26.422	29.357	27.687	26.137	26.094					24.193			23.413			25.444	29.455		26.568	29.209	27.306	25.057	25.267
d6-GM-CSF/LI-3- Sca1 HIGH (H)	453	23.774			23.241	28.148		23.444	23.964			26.296		23.711			22.015	28.682	26.611	24.345			22.837	27.844		23.602	23.529			25.658		24.115			22.011	28.584	26.774	23.828			23.426	28.153		23.523	23.624			25.537
d6-GM-CSF/LI-3- Sca1 HIGH (H)	454	24.51	28.183		25.255	25.649	26.114	22.621	23.829			24.444		24.349	27.297		23.319	27.719	27.276	24.269			24.777	25.615	26.454	22.465	23.649			24.635		24.469			22.873	27.212	27.643	23.82	29.399		24.215	25.986	26.601	23.011	23.855			24.866
d6-GM-CSF/LI-3- Sca1 HIGH (H)	455	25.165	29.497		27.457		23.837	27.7	26.525			23.73		24.757	29.387		26.196			25.158			27.843		23.75	27.316	26.834			23.512		24.762			25.952			25.55			27.935		23.576	27.102	26.705			23.581
d6-GM-CSF/LI-3- Sca1 HIGH (H)	456	22.133			26.774	27.41	22.216	23.982	25.635			24.786		23.353	26.565		23.495	27.431		22.2			27.078	27.388	22.498	24.141	26.289			24.08		23.6	29.615		23.359	27.588		22.279			26.917	27.31	22.248	24.288	25.607			24.356
d6-GM-CSF/LI-3- Sca1 HIGH (H)	457				26.841	28.034	25.863	27.692	26.379					29.072			23.805			28.911			26.426	28.311	25.921	26.939	26.236								24.969						26.787	27.835	26.079	26.852	26.333
d6-GM-CSF/LI-3- Sca1 HIGH (H)	458	24.724				27.786	23.942	25.953	27.652					25.98	28.504		26.748		29.356	24.808				27.85	24.033	26.245	27.46					25.59	28.71		26.717		29.344	24.847				27.83	23.613	26.067	27.743
d6-GM-CSF/LI-3- Sca1 HIGH (H)	459	22.609			27.302		22.96	26.384	27.368					25.676			24.198	28.899	27.943	22.506			26.428		22.894	26.958	26.828					25.897			24.838		28.018	22.474			27.221		22.749	26.401	27.245		27.664
d6-GM-CSF/LI-3- Sca1 HIGH (H)	460	24.37			26.218	26.305	23.226	24.19	26.035					23.454	25.276			26.711	28.058	24.896			26.982	26.607	23.01	24.187	26.638					23.534	25.254			26.786	28.062	24.921			26.717	26.449	23.295	24.58	26.614
d6-GM-CSF/LI-3- Sca1 HIGH (H)	461	23.848					21.937	27.197						26.736	25.926		25.226	27.361		23.85					21.914	27.178						27.015	26.696		25.418	27.662		24.057					22.014	26.704
d6-GM-CSF/LI-3- Sca1 HIGH (H)	462		24.022		25.273	26.394		24.398	24.794					25.733		25.784	22.105				24.713		24.759	26.313			22.824					25.825			21.529	28.225			25.487		25.682			24.01	23.035
d6-GM-CSF/LI-3- Sca1 HIGH (H)	463	22.956			25.933	26.038	22.899	26.433	25.214			24.283		23.68			24.818	27.853	27.656	22.535			26.524	26.26	22.977	26.236	25.33			23.677		23.624			24.993	27.359	27.214	22.672			25.974	25.852	22.823	25.794	24.717			24.34
d6-GM-CSF/LI-3- Sca1 HIGH (H)	464	23.899			24.588	25.895	26.076	23.574	24.783					24.464			23.767	28.683		23.968			24.603	26.03	26.838	23.346	24.919					24.159			23.94			24.01			24.282	26.107	26.447	23.234	25.884
d6-GM-CSF/LI-3- Sca1 HIGH (H)	465	26.28			22.885	26.941	26.696	25.373						25.627			22.576		29.673	26.33			22.839	27.894	25.63	25.026						25.778		28.76	22.734	30.851	29.509	26.703			22.837	27.847	26.984	25.245
d6-GM-CSF/LI-3- Sca1 HIGH (H)	466	24.156	29.677		27.154	25.842		25.599	23.931					25.101			22.496	28.391		24.161	29.656		27.65	26.282		25.427	24.037					25.032	29.251		22.342			23.863			26.742	25.56		25.097	24.665
d6-GM-CSF/LI-3- Sca1 HIGH (H)	467	25.2			25.639	25.865	27.674	25.218	24.89					25.335			25.098			24.925			25.778	25.506	27.71	25.039	24.619			28.591		24.738			25.842			25.043			25.483	25.354	26.999	24.91	24.788
d6-GM-CSF/LI-3- Sca1 HIGH (H)	468	21.508			25.788	25.015	22.694	25.308	24.586			21.887		22.067			24.44	28.438		21.576			25.625	25.303	22.294	25.412	24.528			21.706		22.22			24.053		29.543	21.476			25.193	25.14	22.446	26.121	24.827			21.899
d6-GM-CSF/LI-3- Sca1 HIGH (H)	469	26.371	29.125		24.145	26.656		24.634	24.609					24.355			23.183	28.651		26.714			24.764	26.798		24.393	24.668					24.424			22.716	28.405		26.593	29.726		24.824	26.679		24.534	24.594
d6-GM-CSF/LI-3- Sca1 HIGH (H)	470	22.005			27.722	26.811	22.418	25.023	25.299			23.684		24.388			25.773	27.914		22.235			27.924	27.487	22.65	24.428	25.695			23.176		24.497			25.573	28.112		22.211			27.774	27.626	22.503	24.621	25.281			23.188
d6-GM-CSF/LI-3- Sca1 HIGH (H)	471	22.895			27.146	25.803	24.216	24.357				23.143		23.344			24.15			22.548			26.733	26.357	24.565	24.505	29.285			23.167		23.556			24.273			23.075			26.804	26.365	24.23	24.413	29.215			23.203
d6-GM-CSF/LI-3- Sca1 HIGH (H)	472	20.729			27.113	24.481	21.797	22.834	24.746			23.05		22.548			22.385	27.396	28.595	20.518			26.62	24.929	21.703	22.549	24.561			22.956		22.683			22.498	27.734		20.692			26.326	24.53	21.33	22.854	24.831			22.719
d6-GM-CSF/LI-3- Sca1 HIGH (H)	473	22.521			24.953	25.316	23.907	25.12	25.784			22.518		22.695			25.264	28.355	28.419	22.352			25.282	25.914	24.267	25.266	26.272			23.105		22.761			26.122	28.259	28.131	22.076			24.875	25.721	24.385	25.13	26.213			22.677
d6-GM-CSF/LI-3- Sca1 HIGH (H)	474	21.992	29.545			24.356	24.003	22.668	25.576			25.762		23.783			24.769			21.896				24.573	24.548	22.498	24.657			25.595		23.777			24.598			22.233				24.367	24.264	21.996	24.393			25.186
d6-GM-CSF/LI-3- Sca1 HIGH (H)	475	21.503			25.783	25.01	22.689	25.303	24.581			21.882		22.062			24.435	28.433		21.571			25.62	25.298	22.289	25.407	24.523			21.701		22.215			24.048		29.538	21.471			25.188	25.135	22.441	26.116	24.822			21.894
d6-GM-CSF/LI-3- Sca1 HIGH (H)	476		23.916		25.167	26.288		24.292	24.688					25.627		25.678	21.999				24.607		24.653	26.207			22.718					25.719			21.423	28.119			25.381		25.576			23.904	22.929
d6-GM-CSF/LI-3- Sca1 HIGH (H)	477	22.965			25.942	26.047	22.908	26.442	25.223			24.292		23.689			24.827	27.862	27.665	22.544			26.533	26.269	22.986	26.245	25.339			23.686		23.633			25.002	27.368	27.223	22.681			25.983	25.861	22.832	25.803	24.726			24.349
d6-GM-CSF/LI-3- Sca1 HIGH (H)	478	23.908			24.597	25.904	26.085	23.583	24.792					24.473			23.776	28.692		23.977			24.612	26.039	26.847	23.355	24.928					24.168			23.949			24.019			24.291	26.116	26.456	23.243	25.893
d6-GM-CSF/LI-3- Sca1 HIGH (H)	479	26.289			22.894	26.95	26.705	25.382						25.636			22.585			26.339			22.848	27.903	25.639	25.035						25.787			22.743			26.712			22.846	27.856	26.993	25.254
d6-GM-CSF/LI-3- Sca1 HIGH (H)	480	24.147			27.145	25.833		25.59	23.922					25.092			22.487	28.382		24.152			27.641	26.273		25.418	24.028					25.023			22.333			23.854			26.733	25.551		25.088	24.656
d6-GM-CSF/LI-3- Sca1 HIGH (H)	481	25.191			25.63	25.856	27.665	25.209	24.881					25.326			25.089			24.916			25.769	25.497	27.701	25.03	24.61			28.582		24.729			25.833			25.034			25.474	25.345	26.99	24.901	24.779
d6-GM-CSF/LI-3- Sca1 HIGH (H)	482	21.499			25.779	25.006	22.685	25.299	24.577			21.878		22.058			24.431	28.429		21.567			25.616	25.294	22.285	25.403	24.519			21.697		22.211			24.044			21.467			25.184	25.131	22.437	26.112	24.818			21.89
d6-GM-CSF/LI-3- Sca1 HIGH (H)	483	26.582			24.356	26.867		24.845	24.82					24.566			23.394	28.862		26.925			24.975	27.009		24.604	24.879					24.635			22.927	28.616		26.804			25.035	26.89		24.745	24.805
d6-GM-CSF/LI-3- Sca1 HIGH (H)	484	22.216			27.933	27.022	22.629	25.234	25.51			23.895		24.599			25.984	28.125		22.446			28.135	27.698	22.861	24.639	25.906			23.387		24.708			25.784	28.323		22.422			27.985	27.837	22.714	24.832	25.492			23.399
d6-GM-CSF/LI-3- Sca1 HIGH (H)	485	22.31			24.742	25.105	23.696	24.909	25.573			22.307		22.484			25.053	28.144	28.208	22.141			25.071	25.703	24.056	25.055	26.061			22.894		22.55			25.911	28.048	27.92	21.865			24.664	25.51	24.174	24.919	26.002			22.466
d6-GM-CSF/LI-3- Sca1 HIGH (H)	486	21.781				24.145	23.792	22.457	25.365			25.551		23.572			24.558			21.685				24.362	24.337	22.287	24.446			25.384		23.566			24.387			22.022				24.156	24.053	21.785	24.182			24.975
d6-GM-CSF/LI-3- Sca1 HIGH (H)	487	21.401			25.681	24.908	22.587	25.201	24.479			21.78		21.96			24.333	28.331		21.469			25.518	25.196	22.187	25.305	24.421			21.599		22.113			23.946			21.369			25.086	25.033	22.339	26.014	24.72			21.792
d6-GM-CSF/LI-3- Sca1 HIGH (H)	488	21.991			26.632	27.268	22.074	23.84	25.493			24.644		23.211	26.423		23.353	27.289		22.058			26.936	27.246	22.356	23.999	26.147			23.938		23.458			23.217	27.446		22.137			26.775	27.168	22.106	24.146	25.465			24.214
d6-GM-CSF/LI-3- Sca1 HIGH (H)	489				26.947	28.14	25.969	27.798	26.485								23.911			29.017			26.532	28.417	26.027	27.045	26.342								25.075						26.893	27.941	26.185	26.958	26.439
d6-GM-CSF/LI-3- Sca1 HIGH (H)	490	24.83				27.892	24.048	26.059	27.758					26.086	28.61		26.854			24.914				27.956	24.139	26.351	27.566					25.696	28.816		26.823			24.953				27.936	23.719	26.173	27.849
d6-GM-CSF/LI-3- Sca1 HIGH (H)	491	22.715			27.408		23.066	26.49	27.474					25.782			24.304		28.049	22.612			26.534		23	27.064	26.934					26.003			24.944		28.124	22.58			27.327		22.855	26.507	27.351		27.77
d6-GM-CSF/LI-3- Sca1 HIGH (H)	492	24.979			25.034	25.995	24.385	22.888	25.341					23.787			24.15	28.126		24.624			24.466	25.466	24.31	22.939	25.784					24.04			23.936	27.411		24.642			25.066	25.332	23.738	22.891	25.173
d6-GM-CSF/LI-3- Sca1 HIGH (H)	493	25.204			26.084			25.98	26.108					24.205			23.312	28.574		25.279			26.564		27.829	26.279	26.236					24.335			23.555			25.586			26.71		27.448	25.199	25.409
d6-GM-CSF/LI-3- Sca1 HIGH (H)	494	23.916			23.383	28.29		23.586	24.106			26.438		23.853			22.157	28.824	26.753	24.487			22.979	27.986		23.744	23.671			25.8		24.257			22.153	28.726	26.916	23.97			23.568	28.295		23.665	23.766			25.679
d6-GM-CSF/LI-3- Sca1 HIGH (H)	495	24.368	28.041		25.113	25.507	25.972	22.479	23.687			24.302		24.207	27.155		23.177	27.577	27.134	24.127			24.635	25.473	26.312	22.323	23.507			24.493		24.327			22.731	27.07	27.501	23.678			24.073	25.844	26.459	22.869	23.713			24.724
d6-GM-CSF/LI-3- Sca1 HIGH (H)	496	25.023			27.315		23.695	27.558	26.383			23.588		24.615			26.054			25.016			27.701		23.608	27.174	26.692			23.37		24.62			25.81			25.408			27.793		23.434	26.96	26.563			23.439
d6-GM-CSF/LI-3- Sca1 HIGH (H)	497	23.106			27.357	26.014	24.427	24.568				23.354		23.555			24.361			22.759			26.944	26.568	24.776	24.716				23.378		23.767			24.484			23.286			27.015	26.576	24.441	24.624				23.414
d6-GM-CSF/LI-3- Sca1 HIGH (H)	498	20.518			26.902	24.27	21.586	22.623	24.535			22.839		22.337			22.174	27.185	28.384	20.307			26.409	24.718	21.492	22.338	24.35			22.745		22.472			22.287	27.523		20.481			26.115	24.319	21.119	22.643	24.62			22.508
d6-GM-CSF/LI-3- Sca1 HIGH (H)	499	24.264			26.112	26.199	23.12	24.084	25.929					23.348	25.17			26.605	27.952	24.79			26.876	26.501	22.904	24.081	26.532					23.428	25.148			26.68	27.956	24.815			26.611	26.343	23.189	24.474	26.508
d6-GM-CSF/LI-3- Sca1 HIGH (H)	500	23.742					21.831	27.091						26.63	25.82		25.12	27.255		23.744					21.808	27.072						26.909	26.59		25.312	27.556		23.951					21.908	26.598
[truncated: 25 more columns]

## Sheet: COMB treated (d1,d3,d6)
		There are 3 tech replicates/assay for each sample
		Technical Replicate 1																		Technical Replicate 2																		Technical Replicate 3
		Pu.1	Hba-a1	Egr2	ckit	TBP	CD11b	Runx1	Scl	EpoR	CEBPa	Gfi1	Eklf	cMyb	cJun	Fog1	Gata2	Fli1	Gata1	Pu.1	Hba-a1	Egr2	ckit	TBP	CD11b	Runx1	Scl	EpoR	CEBPa	Gfi1	Eklf	cMyb	cJun	Fog1	Gata2	Fli1	Gata1	sfpi1	Hba-a1	Egr2	ckit	TBP	CD11b	Runx1	Scl	EpoR	CEBPa	Gfi1	Eklf
d1-COMB- Sca1 LOW (L)	1		25.579		27.92	24.841			25.236					26.294			23.365		24.903				27.584	24.896			24.81					25.74			23.27		24.245		25.68		27.39	24.995			25.465
d1-COMB- Sca1 LOW (L)	2				26.58	25.3		25.733	25.121					23.92			22.571						26.587	25.478		25.885	25.27					24.339			24.427							25.375		25.784	25.258
d1-COMB- Sca1 LOW (L)	3		25.117			27.822			24.369					24.017			21.479	28.874	24.668		25.745			28.325			24.473					23.87			21.463	27.953	24.01		25.569			27.947			24.415
d1-COMB- Sca1 LOW (L)	4	24.856				25.963		25.825	24.159					25.859			24.701		25.133	24.991			25.896	26.601		25.785	24.145					25.589			24.433		25.126	24.951			25.786	26.333		25.785	24.14
d1-COMB- Sca1 LOW (L)	5	24.453	24.521		25.014	25.386		22.363	21.24	27.845			28.111	23.656		28.771	21.243		24.458	24.471	24.554		24.91	25.314		21.789	21.65	28.12				24.325			21.598		24.416	24.38	24.225		24.69	25.145		21.81	21.121
d1-COMB- Sca1 LOW (L)	6	24.874	22.466			25.418		26.689	22.777				28.488	23.72			22.39		21.236	24.761	22.499		26.298	25.513		26.44	22.33				28.492	23.71		28.668	22.452		21.214	25.152	22.128		26.44	25.542		26.835	22.721				28.995
d1-COMB- Sca1 LOW (L)	7	24.781	23.78			24.582		25.63	23.655				27.75	22.923	27.55	28.34	22.574		25.125	24.875	23.839			24.872		25.641	23.3	29.756			27.172	23.7	27.799		22.662		24.96	25.14	23.864			24.388		25.867	23.173				27.569
d1-COMB- Sca1 LOW (L)	8	24.785			25.897	27.098		25.44	23.936					23.931			22.249		25.288	24.676	24.338		26.012	27.462		25.541	23.571					24.022			22.483		24.933	24.775			25.897	27.608		25.52	24.432
d1-COMB- Sca1 LOW (L)	9		22.365		26.153	26.624	27.563	24.485	23.741					24.758			24.953		24.457		22.365		25.975	26.111		24.542	23.741					23.944	26.926		24.875		24.437		22.356		26.18	26.796	27.54	24.452	23.747
d1-COMB- Sca1 LOW (L)	10	23.369			25.772	25.531		25.799	25.159					24.369			24.299			23.412			26.145	25.42		25.745	25.123					24.31			24.485			23.369			26.174	25.478		25.658	25.17
d1-COMB- Sca1 LOW (L)	11	26.753	27.374			25.745		23.563	21.478					26.369					25.947		27.532			25.877		23.72	21.475					26.381			25.688		25.813	26.23				25.308		23.685	21.531	29.317
d1-COMB- Sca1 LOW (L)	12		25.829		25.452	25.199			24.991				28.45	24.987			23.174	28.926	25.102		25.324		25.542	25.412			24.34	29.748				25.12			23.159		24.896				25.768	25.341			24.585
d1-COMB- Sca1 LOW (L)	13	25.448	23.557		25.517	25.309		28.219	23.252					24.209			23.596		25.122	25.157	23.131		26.052	25.36		28.144	23.132					24.552			24.516		24.936	24.952	23.445		25.841	25.385		27.346	23.302
d1-COMB- Sca1 LOW (L)	14	25.52	26.163		26.044	27.135		26.364	24.055					25.893			24.127		25.529	25.463	25.914		26.942	26.224		26.324	24.125					26.613			24.404		25.638	25.608	25.498		26.649	26.345		26.067	24.475
d1-COMB- Sca1 LOW (L)	15	26.097	22.022		25.822	25.849		25.752	24.092					25.322			24.475		24.526	25.619	22.354		26.028	26.202		25.271	23.796					25.365			24.414		24.902	25.559	21.966		25.674	26.117		25.632	24.422
d1-COMB- Sca1 LOW (L)	16	28.817	22.154		26.405	26.148		25.267	23.73					23.69		28.957	23.107	28.951	24.689	28.755	21.961		26.839	26.682		24.785	23.59					23.769			23.179		24.147	28.016	22.327		26.049	26.401		24.78	23.269
d1-COMB- Sca1 LOW (L)	17	25.621	26.393		24.877	24.952		25.006	24.02					24.613			24.269	29	25.586	26.174	27.528		24.875	25.669		25.143	24.069					24.679			24.54		25.82	25.026	26.784		24.496	25.106		25.518	24.493
d1-COMB- Sca1 LOW (L)	18		24.662		24.596	27.809			24.294					24.141			21.603	28.998	24.792		24.37		24.89	27.473			24.04					23.994			21.587	28.077	24.134		23.994		25.07	27.279			24.376
d1-COMB- Sca1 LOW (L)	19	25.423	23.35		25.006	27.933		24.86	23.869					25.808		29.058	24.08	27.921	23.908	25.527	22.876		24.756	28.436		24.902	23.534					25.633		28.893	24.114		24.046	25.103	23.223		24.585	28.058		24.829	23.768
d1-COMB- Sca1 LOW (L)	20	23.278			25.291	26.074		25.224	25.003					25.797		26.418	24.824		27.878	23.475			25.543	26.712		25.175	25.991					25.994		26.264	24.556		27.738	23.173			24.706	26.444		25.139	25.532		28.56
d1-COMB- Sca1 LOW (L)	21	25.23	21.277		26.016	26.248		24.274	23.671					23.777		28.119	22.179		24.362	25.206	21.19		26.837	26.172		23.961	23.462					23.803			22.949	27.791	24.856	25.421	21.168		26.358	26.08		24.267	23.818
d1-COMB- Sca1 LOW (L)	22	25.514	23.306		23.839	25.988		24.41	22.61					24.031			21.644	28.93	24.888	25.314	23.099		23.97	25.766		23.443	22.293					24.45			21.447	28.939	25.226	25.022	23.007		23.898	25.114		24.006	21.914
d1-COMB- Sca1 LOW (L)	23	27.005			24.121	25.832		25.09	23.529					24.866		28.338	24.501			27.527			24.494	25.746		25.018	23.54					25.473			24.118			27.399			24.535	25.421		25.538	23.608
d1-COMB- Sca1 LOW (L)	24	25.442	24.885			25.398		25.147	24.048					24.848			21.733		24.579	25.73	24.433			25.016		25.372	24.218					24.588			21.498		24.474	26.025	24.812			24.888		25.076	23.931
d1-COMB- Sca1 LOW (L)	25	25.478	25.547			25.221		25.044	25.85					24.732			24.489		24.476	25.653	25.569			25.26		25.269	25.578					24.472			24.591		24.371	25.52	25.542			25.267		24.973	25.596
d1-COMB- Sca1 LOW (L)	26	25.102			25.934	25.507			25.658					25.14		29.64	24.251		25.014	24.723	25.821		26.31	26.063			25.875					25.147			24.245		25.142	24.874	25.692		26.123	25.871			25.97
d1-COMB- Sca1 LOW (L)	27		25.368		25.944			26.349	24.986					24.421			24.168		25.567		25.216		26.8			26.563	25.145					24.7			24.236		25.542				26.12			26.542	25.214
d1-COMB- Sca1 LOW (L)	28	26.065	24.072		28.125	29.539		26.046	25.556					25.351	28.539		25.407		26.019	26.141	24.313		29.11	29.364		26.499	23.955					25.285			25.411		26.295	25.621	23.783		28.966	29.24		26.722	24.234
d1-COMB- Sca1 LOW (L)	29	24.756	24.582		24.758	24.466		23.542	21.713				27.664	25.456		28.915	21.22		25.236	24.77	24.563		25.179	23.753		23.933	21.965					25.345			21.645		25.57	23.957	24.596		24.492	24.556		23.587	22.154				27.553
d1-COMB- Sca1 LOW (L)	30		23.992		26.155			26.128	23.66				28.362	24.918			24.759		25.369		23.53		26.124	26.283		26.574	23.428					25.217			24.638		25.338		23.944		26.421	26.276		26.811	23.42
d1-COMB- Sca1 LOW (L)	31					27.11			23.672					24.03			24.12		24.874		26.73			27.474			23.685					23.883			24.532		24.745		26.756			27.62			23.698
d1-COMB- Sca1 LOW (L)	32	25.563			25.563	24.563		25.739	24.893					23.42			25.273		27.142	25.563			25.563	24.496		25.799	24.79					23.458			25.311		27.236	25.563			25.563	24.957		25.785	25.38
d1-COMB- Sca1 LOW (L)	33	23.74			24.58	25.498		25.264	22.315					23.696			22.566			23.835			24.78	25.46		25.845	22.26					23.383		28.94	22.47			23.334			24.485	25.229		25.153	22.365
d1-COMB- Sca1 LOW (L)	34		25.754		25.452	25.738			24.986					23.666			24.371		26.125		25.61		25.452	26.091			25.3					23.692			24.367		26.11		25.654		25.567	26.006			24.896
d1-COMB- Sca1 LOW (L)	35	25.475			25.982	26.037		25.458	24.741					24.84			24.28		25.597	25.653	27.542		25.896	26.571		25.499	24.741					24.896			24.551		25.831	25.755	27.488		25.798	26.29		25.452	24.776
d1-COMB- Sca1 LOW (L)	36		25.363		24.785	26.338		25.978	24.653					24.619			21.592	28.987	24.781		24.824		24.764	26.369		26.855	24.635					24.814			21.576	28.066	24.123		24.896		24.712			26.754	24.654
d1-COMB- Sca1 LOW (L)	37	25.246			26.484	26.735		26.624	25.163					25.333			23.815			25.088			25.698	26.222		26.524	25.593					25.185			24.723			25.124			26.562	26.907		26.185	25.417
d1-COMB- Sca1 LOW (L)	38	25.974	21.899		25.699	25.726		25.629	23.969					25.199			24.352		24.403	25.496	22.231		25.905	26.079		25.148	23.673					25.242			24.291		24.779	25.436	21.843		25.551	25.994		25.509	24.299
d1-COMB- Sca1 LOW (L)	39	22.94			25.258	26.192		22.815	23.935			26.654		24.72			24.325			23.302			25.462	25.988		22.797	23.952			26.537		24.304			24.205			23.462			25.37	25.419		22.53	23.733			26.402
d1-COMB- Sca1 LOW (L)	40	25.598	23.598		26.51	28.312		25.195	23.628					23.475			24.248		25.937	25.926	23.884		26.111	28.337		25.85	23.867					23.556			24.215		25.927	26.272	23.889		26.634	27.223		25.38	23.56
d1-COMB- Sca1 LOW (L)	41	26.634	25.054		26.263	25.332		26.665	23.986					24.869			24.522		26.382	26.381	24.403		26.375	25.371		26.239	23.948					24.055			24.32	29.015	25.842	26.524	24.995		26.85	25.378		26.839	23.963
d1-COMB- Sca1 LOW (L)	42	24.527	29.405		26.785	25.618		27.433	24.732					26.565			22.784		25.689	24.754	29.389		25.913	26.174		27.042	24.53					26.636		27.785	22.687		25.456	25.242			26.968	25.982		27.114	24.672
d1-COMB- Sca1 LOW (L)	43	24.569	29.391		26.02				24.782					24.016			23.658			24.847			25.798	29.416			24.493					24.361			23.778			25.176	29.702		25.444				24.295
d1-COMB- Sca1 LOW (L)	44	26.166	24.173		28.226	29.65		26.147	25.657					23.24	28.64		25.508		26.12	26.242	24.414		29.211	29.465		26.6	24.056					23.603			25.512		26.396	25.722	23.884		29.067	29.341		26.823	24.335
d1-COMB- Sca1 LOW (L)	45	25.437	24.88			25.393		25.142	24.043					24.843			21.728		24.574	25.725	24.428			25.011		25.367	24.213					24.583			21.493		24.469	26.02	24.807			24.883		25.071	23.926
d1-COMB- Sca1 LOW (L)	46	24.124	20.452		24.536			23.896	21.854				25.916	22.412		25.371	22.093	29.504	23.608	23.582	20.351		24.209	26.394		23.766	21.651				26.495	23.579		25.115	22.153	29.22	24.182	24.009	21.009		24.716	26.387		23.844	22.087				26.267
d1-COMB- Sca1 LOW (L)	47	24.019	25.214			27.221		25.317	24.059					24.054			22.373		25.412	24.946	25.709			27.585		25.439	23.694					24.145			22.607		25.057	24.843	25.626			27.731		25.479	24.555
d1-COMB- Sca1 LOW (L)	48	26.636	29.507		24.736			25.096	24.347					25.462			24.998	28.838	25.781	26.864			25.065	28.156		25.31	24.633					25.396			25.273		26.322	26.218			25.34	28.361		25.014	24.292
d1-COMB- Sca1 LOW (L)	49	23.385	23.961		25.951	23.819		23.67	23.417					23.62		27.979	20.782	29.47	24.515	23.815	23.945		26.221	24.226		23.466	23.1					23.555		27.949	20.521	29.12	24.374	23.849	24.15		25.875	23.96		23.68	22.971
d1-COMB- Sca1 LOW (L)	50	25.865	26.426			26.056		27.392	23.08					26.359			23.958		26.908	25.876	26.787			25.718		27.142	23.353					26.124			24.746		26.445	25.193	26.351			25.786		27.221	23.569
d1-COMB- Sca1 MID (M)	51				28.854	26.945			24.654					24.574										26.93			24.613					24.558			28.363							26.879			24.547
d1-COMB- Sca1 MID (M)	52	25.876			28.046	27.125		26.547	24.721					23.124			28.269									26.547	24.741					22.908									29.056			26.653	24.785
d1-COMB- Sca1 MID (M)	53		28.799					23.942	24.563					23.593			19.886		24.023	25.341			28.992	24.34		24.152	24.587					23.542			19.808		24.547	25.35			23.684			24.103	24.533
d1-COMB- Sca1 MID (M)	54					28.355		25.219	25.785					25.018			22.452	29.608		28.916						25.362	25.239					25.862			22.563			28.777						25.327	25.967
d1-COMB- Sca1 MID (M)	55	25.622	29.75		25.735	25.023		24.714	22.39				27.558	22.611		29.048	23.926	29.202		25.274			25.628	25.093		24.727	21.816					22.582		29.334	23.928		27.172	25.366	29.839		26.293	24.739		24.572	21.966				27.383
d1-COMB- Sca1 MID (M)	56	25.692			27.213	25.164		24.21	23.864					23.585		29.104	24.664	30.06		25.621			27.213	25.271		24.025	24.423					23.81			25.048	30.114		26.093			27.228	25.213		23.671	24.452
d1-COMB- Sca1 MID (M)	57	27.054			26.43	25.993		25.911	25.261					22.648			25.91			27.378			26.369	26.515		26.188	24.779					22.261			25.741	28.013		26.806			26.156	25.951		26.454	25.245
d1-COMB- Sca1 MID (M)	58	26.041	29.44					24.882	24.563					24.559			25.197			26.04	29.697					24.911	24.523					24.434			25.123			26.044	29.369					24.865	24.589
d1-COMB- Sca1 MID (M)	59	22.373			27.095			26.155	25.172					24.013			27.344			22.71			27.123			26.215	25.214					24.16		28.253	27.522			22.913						26.257	25.163
d1-COMB- Sca1 MID (M)	60	24.494				27.125			24.931					24.742						24.055	29.603			27.362			24.672					24.482						24.44	30.016			27.2			24.479
d1-COMB- Sca1 MID (M)	61				26.002				25.744					25.412			25.092						25.818				25.789					25.365			25.147				29.146		25.876				25.785
d1-COMB- Sca1 MID (M)	62				26.184			25.427	21.655					23.184			26.925			27.905			26.328		28.912	25.827	21.483					22.649			26.292			27.841	29.743		26.256			25.224	21.125
d1-COMB- Sca1 MID (M)	63	26.665			25.858			28.159						24.789			24.114			26.469			26.47			29.653						24.823			24.236			26.346			26.155			28.022	24.896
d1-COMB- Sca1 MID (M)	64	26.565	28.023		24.457	25.953		26.372	23.774			27.748		24.321			22.733	28.958		27.149	28.414		23.925	26.199		26.626	23.906			27.87		24.075			22.466			27.352	28.562		24.547	25.999		26.889	23.708
d1-COMB- Sca1 MID (M)	65	24.768			26.597	28.573		24.718	25.614					23.593			24.567			25.008			26.851	28.465		24.713	25.903					23.885			24.602			25.065			26.673	28.626		24.706	25.616
d1-COMB- Sca1 MID (M)	66	23.784			21.492	24.945		24.66	22.056					22.911			21.191		25.926	24.189			21.698	25.117		24.97	22.421					22.918			21.068		26.095	23.724			21.7	25.305		24.897	22.488
d1-COMB- Sca1 MID (M)	67	27.848			26.485	27.882		28.496	26.52					27.465			27.338			28.041			27.289	28.006		28.308	26.89					27.296						27.984			26.879	28.481		28.225	26.381
d1-COMB- Sca1 MID (M)	68								27.021								23.608										26.526								23.54										26.525
d1-COMB- Sca1 MID (M)	69	22.06			26.578	26.936	22.823	25.926	25.315					25.212	26.944		26.19	29.658		21.913			27.613	26.858	22.333	26.663	25.806					25.371	27.606		26.306	29.804	28.582	21.835	29.423		26.423	26.241	22.896	26.28	25.789
d1-COMB- Sca1 MID (M)	70	24.111			23.094	25.814		23.617	23.476					24.03			22.611	28.18		23.606			23.44	26.112		23.586	23.948					23.88			22.291	28.575		24.079			23.722	26.521		23.335	23.662
d1-COMB- Sca1 MID (M)	71	24.147	27.462		22.847	24.804	27.365	27.193	21.533		27.083	26.03		22.072		24.453	23.67	27.818	26.583	24.162	27.213		22.772	24.828	27.129		20.766			26.791		22.598			23.849	27.441	26.899	23.955	27.231		22.737	24.164	26.741	27.384	21.492			26.736
d1-COMB- Sca1 MID (M)	72				27.596			26.858	29.011					26.555			26.985						27.313			26.322						26.52			27.222						26.704			26.649
d1-COMB- Sca1 MID (M)	73	25.978	28.18		28.148	27.227		27.378	27.75					26.511	26.535					26.092	27.869		28.3	27.957		27.229	26.955					25.971	26.693				29.441	26.242	28.371		28.256	27.422		26.922	27.246
d1-COMB- Sca1 MID (M)	74	25.726	24.745		23.94	24.921		23.228	22.072					23.695			19.988	28.1	24.125	25.443	24.364		23.824	24.442		23.734	22.243					23.644			19.91	28.143	24.649	25.452	24.982		23.786	24.575		23.62	22.184	28.604
d1-COMB- Sca1 MID (M)	75	24.872	28.059		26.798	28.677			24.688					26.826			25.352			25.112			26.782	28.569			24.452					26.785			25.369			25.169			27.191	28.73			24.104
d1-COMB- Sca1 MID (M)	76	23.68			26.777	24.841		24.789	24.452					24.075					25.822	24.085			26.754	25.013		24.724	24.67					24.563					25.991	23.62			26.787	25.201		24.859	24.543
d1-COMB- Sca1 MID (M)	77	26.738			25.694	25.835		25.276	23.244					23.544			26.491			26.461			26.144	25.986	28.844	25.223	23.221					23.54			26.61			26.911			26.158	26.248		24.77	23.671
d1-COMB- Sca1 MID (M)	78	27.698			27.016			24.567	24.068					24.563			26.369			27.763			27.321			25.255	24.366					24.535		28.076	26.116						27.125			24.426	24.088				28.941
d1-COMB- Sca1 MID (M)	79	24.114	25.433		23.097	26.225	28.247	23.62	23.012	26.853				24.033	28.595		27.365	25.374		23.609	25.753	29.89	23.443	26.156	27.878	23.589	23.875	27.597				23.883	27.965		27.302	25.144	29.26	24.082	25.902	29.243	23.725	26.214	27.531	23.338	23.635	27.004
d1-COMB- Sca1 MID (M)	80				28.7			25.087						25.365			26.314						28.452			25.178						25.046			26.241									25.124
d1-COMB- Sca1 MID (M)	81				27.772			24.875						26.463		28.826							27.754			24.829						26.358		28.799										24.896
d1-COMB- Sca1 MID (M)	82	25.975			27.103	27.459		25.452	25.136					24.792			24.235		29.674	25.896			27.037	27.452		25.485	25.147					24.563			24.426			26.012			26.985	27.521		25.471	25.189
d1-COMB- Sca1 MID (M)	83							25.023	24.789					23.692			25.307		24.122	25.44	24.361		23.821	24.439		24.997	24.815					23.641			25.626		29.144	25.449	24.979		23.783	24.572		25.121	24.729
d1-COMB- Sca1 MID (M)	84	22.077			26.93	27.452		25.949	25.338			28.847		24.937			27.506			21.93			27.242	27.365		26.031	25.307					25.124			27.563			21.852			26.975	27.394		25.851	25.285			28.155
d1-COMB- Sca1 MID (M)	85	26.218			25.379	26.082		24.011	21.876					22.245		29.246	25.475			26.148			25.597	25.882		24.51	21.719					21.892		29.156	25.623	28.377		26.383			25.706	25.87		24.15	21.855
d1-COMB- Sca1 MID (M)	86	25.35	23.237		23.671	24.84		22.857	21.902					23.601	26.488	26.957	19.91	28.908	23.403	25.12	23.603		23.92	25.131		23.169	21.969					23.119	26.144	26.788	19.859	28.239	23.119	25.112	22.937		23.991	24.957		23.052	21.578
d1-COMB- Sca1 MID (M)	87				24.786	28.391		25.093	25.599			27.876		25.237		28.756			29.812				24.85	28.46		24.788	25.782			27.106		25.742		28.967			29.602				25.425			24.66	25.582			27.673
d1-COMB- Sca1 MID (M)	88	26.022			26.124			29.729	24.792					24.871			23.029			26.021		27.765	26.211			29.192	24.827					25.489			23.425			26.025			26.652			29.045	24.761
d1-COMB- Sca1 MID (M)	89	22.354			27.213	28.654	27.371	23.582	24.208			27.026		25.494			24.495			22.691			26.987		27.142	24.232	25.086			27.369		25.224			23.773	29.608		22.894			27.608	28.551	27.092	24.499	24.443			27.484
d1-COMB- Sca1 MID (M)	90	24.475			24.18	26.854		24.074	24.114					23.484	27.161	27.969	25.388	30.191		24.036	27.924	27.72	24.827	26.366		24.464	24.316			27.263		23.442	26.798		25.472	30.651		24.421	28.261		24.806	26.46		24.261	24.134
d1-COMB- Sca1 MID (M)	91	26.976			25.219			28.338	27.919					27.323						27.078			25.105			28.198	27.698					26.986			27.184		28.911				25.651			28.715
d1-COMB- Sca1 MID (M)	92	26.681			25.874	29.51		28.175						26.568			28.305			26.485			26.486			28.217				27.55		26.342						26.362			26.171			28.038	28.128			27.797
d1-COMB- Sca1 MID (M)	93	23.602			25.548	26.424		24.729	25.553					26.396				29.179		23.104			25.7	26.871		24.518	25.847					27.087						23.034			25.821	26.696		24.611	25.81
d1-COMB- Sca1 MID (M)	94	24.152	27.467		22.852	24.809	27.37	27.198	21.538		27.088			22.077		24.458	23.675	27.823	26.588	24.167	27.218		22.777	24.833	27.134		20.771					22.603			23.854	27.446	26.904	23.96	27.236		22.742	24.169	26.746	27.389	21.497
d1-COMB- Sca1 MID (M)	95	24.369			23.843	25.149		24.13	23.667					23.65		28.855	24.988	27.719		24.329			23.579	25.449		23.579	23.593					23.673			25.547	27.468		24.29			23.255	25.22		23.803	23.721
d1-COMB- Sca1 MID (M)	96	23.606			23.962	25.964		24.073	24.308					25.647			25.469	29.369	29.08	23.888			24.002	26.149		24.226	23.832					25.624			25.192	29.012	29.327	23.395			24.423	25.7		24.779	24.367
d1-COMB- Sca1 MID (M)	97	24.196			26.909	26.285		24.431	24.859								24.011	28.958		24.225			27.164	25.64		23.824	24.887								24.717			23.647			26.979	25.489		24.226	25.013
d1-COMB- Sca1 MID (M)	98	22.515	27.689		22.33	25.54	25.399	22.574	22.759					23.162		25.831	23.468	25.565		22.409	27.83		22.355	25.928	25.191	22.347	22.715					23.015		25.014	23.636	25.738		22.295	27.825		22.115	25.741	25.031	22.589	22.878
d1-COMB- Sca1 MID (M)	99	24.88			26.709	28.685		24.83	25.726					23.705			24.679			25.12			26.963	28.577		24.825	26.015					23.997			24.714			25.177			26.785	28.738		24.818	25.728
d1-COMB- Sca1 MID (M)	100	23.672			21.38	24.833		24.548	21.944					22.799			21.079		25.814	24.077			21.586	25.005		24.858	22.309					22.806			20.956		25.983	23.612			21.588	25.193		24.785	22.376
d1-COMB- Sca1 HIGH (H)	101	23.92			22.762	27.825		24.525	22.473					23.804			24.664			23.726			22.796	27.623		23.904	22.462					23.768			24.303			23.532			22.87	25.394		23.679	22.149
d1-COMB- Sca1 HIGH (H)	102	23.086			23.703	27.843		23.514	25.252					25.665			26.602			23.236			23.759	27.717		23.352	25.049					25.862			26.844			23.392			23.761	27.901		23.824	25.232
d1-COMB- Sca1 HIGH (H)	103	28.527																								28.677	28.492					28.633
d1-COMB- Sca1 HIGH (H)	104	26.488	27.607				25.534	27.468						26.071	26.097					26.864	28.201				25.116	27.608						26.461	26.332					26.896	27.979				25.152	27.688
d1-COMB- Sca1 HIGH (H)	105	27.355			27.341	26.885		26.46	27.322								26.548						28.134	27.449		26.189	27.575					28.899			27.86			26.821			26.465			27.4	28.039
d1-COMB- Sca1 HIGH (H)	106	23.416	24.942		23.183	24.525		24.337	25.632	26.609				25.357	26.775	27.274	22.913			23.556			23.202	24.439		24.758	24.983	26.967				24.666	27.275	27.094	22.748			23.658	25.765		23.609	24.215		24.742	25.408	26.87
d1-COMB- Sca1 HIGH (H)	107	27.272						26.249						28.503			28.445			26.817			27.618			26.621	27.147					28.075						28.811						26.003	27.487	28.682
d1-COMB- Sca1 HIGH (H)	108	22.226	28.505																																										28.852
d1-COMB- Sca1 HIGH (H)	109	22.352			22.71	25.504		22.666	24.26			25.165		24.664			22.462			22.405			22.673	25.354		22.751	23.994			25.497		25.056			22.514	28.958		22.486			22.684	25.318		22.988	24.182			25.205
d1-COMB- Sca1 HIGH (H)	110				25.178	26.917	25.933	22.486	25.105					23.89			24.33	27.278	27.556	22.843			25.344	27.141	25.932	22.574	24.75					24.195			23.961	27.718	27.409	23.093			25.71	27.312	25.739	22.497	25.191
d1-COMB- Sca1 HIGH (H)	111	23.019			25.07	26.809	25.825	22.378	24.997					23.782			24.222	27.17	27.448	22.735			25.236	27.033	25.824	22.466	24.642					24.087			23.853	27.61	27.301	22.985			25.602	27.204	25.631	22.389	25.083
d1-COMB- Sca1 HIGH (H)	112	28.985			26.921			25.128	25.745					26.735		28.884				27.369			28.181	28.159		24.461	27.808					28.275			25.689			27.396			26.694			24.905	27.151
d1-COMB- Sca1 HIGH (H)	113	22.48			26.021		25.798	25.066	25.739			27.228		24.151			24.652			22.511			26.36		26.238	24.871	26.355			27.056		24.281			24.743			22.78			25.717		26.091	25.389	25.764			27.129
d1-COMB- Sca1 HIGH (H)	114	24.756			23.754	28.269	26.974	25.96	26.306					24.947			26.687			24.948			23.613	28.008	26.98	26.892	26.026					25.14						25.031			23.874	28.845	27.085	25.844	26.156
d1-COMB- Sca1 HIGH (H)	115	24.298			24.489	26.492		23.959	25.156					25.868			26.364	29.374		24.399			24.237	25.971		23.162	25.446					25.344			26.178		28.619	23.725			24.425	26.205		23.494	25.682
d1-COMB- Sca1 HIGH (H)	116	22.948			23.565	27.705		23.376	25.114					25.527			26.464			23.098			23.621	27.579		23.214	24.911					25.724			26.706			23.254			23.623	27.763		23.686	25.094
d1-COMB- Sca1 HIGH (H)	117	22.475	29.398		22.833	25.627		22.789	24.383			25.288		24.787			22.585			22.528			22.796	25.477		22.874	24.117			25.62		25.179			22.637	29.081		22.609			22.807	25.441		23.111	24.305			25.328
d1-COMB- Sca1 HIGH (H)	118	21.889	26.478		22.291	25.631	27.055	23.639	22.697			26.236		23.258			22.426	28.993		22.012	26.119		21.94	25.137	27.007	23.716	23.186			26.189		23.153			22.248	28.919		22.194	26.519		22.25	25.213	27.12	23.261	22.71			26.076
d1-COMB- Sca1 HIGH (H)	119	23.797			22.639	27.702		24.402	22.35					23.681	26.108		24.541	28.783		23.603			22.673	27.5		23.781	22.339					23.645	26.782		24.18	28.079		23.409			22.747	25.271		23.556	22.026
d1-COMB- Sca1 HIGH (H)	120	22.963			23.58	27.72		23.391	25.129					25.542			26.479			23.113			23.636	27.594		23.229	24.926					25.739			26.721			23.269			23.638	27.778		23.701	25.109
d1-COMB- Sca1 HIGH (H)	121	24.492			23.337	27.088		24.418	26.866					26.494			24.825			24.648			23.377	26.931		25.136	27.474					25.821			25.393			24.939			23.532	27.428		24.849	27.089
d1-COMB- Sca1 HIGH (H)	122	22.314			23.399	27.149		22.911	28.279					24.002			25.573			21.135			23.24	27.464	27.557	23.436	28.163					23.721			25.504			22.255			23.328	27.25	27.486	23.026	28.258
d1-COMB- Sca1 HIGH (H)	123	23.539	25.065		23.306	24.648		24.46	25.755	26.732				25.48	26.898	27.397	23.036			23.679			23.325	24.562		24.881	25.106	27.09				24.789	27.398	27.217	22.871			23.781	25.888		23.732	24.338		24.865	25.531	26.993
d1-COMB- Sca1 HIGH (H)	124	23.479			24.777	24.725		23.11	24.589			27.327		25.972			24.866			23.185	28.284		24.166	24.793		23.759	23.841			26.924		26.319			24.73			23.553	28.056	29.821	24.584	24.214		23.043	24.786			27.106
d1-COMB- Sca1 HIGH (H)	125	25.5			23.373	28.449		24.535	24.526			26.348		27.077			20.336		26.538	25.015			23.161	28.094		24.486	24.401			26.953		26.823			20.567		26.923	24.856			23.454	28.368		24.235	24.53			26.83
d1-COMB- Sca1 HIGH (H)	126	22.598	26.137		26.405	25.322	25.831	26.856	24.947			26.152		27.473	25.998		24.376			23.193	26.847		26.872	25.85	25.667	26.166	25.116			25.75		27.704	25.831		23.925			22.645	26.867		26.473	25.725	25.682	26.364	24.892			25.889
d1-COMB- Sca1 HIGH (H)	127	28.581			28.757												28.234						28.815				27.576																		28.803
d1-COMB- Sca1 HIGH (H)	128	22.058				25.949	25.924	24.487	24.338			25.763		24.545			24.401			21.958				25.622	25.903	23.712	24.456			25.797		24.32			24.622			22.443				25.325	25.222	23.899	24.35			26.462
d1-COMB- Sca1 HIGH (H)	129		26.862		26.522	28.945		28.353	27.654				28.12	27.035		28.446	25.098		28.052		27.011		25.778			27.11	25.773					26.681			25.143		28.166	28.608	27.35		26.535			27.798	26.121
d1-COMB- Sca1 HIGH (H)	130	24.758			26.832		26.214	25.518	25.421					25.875			25.083		28.184	24.674	26.892		26.599	28.064	26.054	25.597	25.235	28.823			28.221	26.012		28.826	25.318	28.892	28.755	25.14	26.952		26.433	27.875	26.219	25.51	25.254				28.288
d1-COMB- Sca1 HIGH (H)	131							25.563	24.456					25.563			26.442			26.789	28.378		27.719			25.721	24.309					25.685			26.883			26.383	28.515		27.317			25.504	24.282
d1-COMB- Sca1 HIGH (H)	132	24.087	26.114		23.656	25.946	26.321	24.713	22.804					24.346		28.598	24.737			24.503	26.138		23.2	25.623	26.297	24.584	22.725					24.074			24.393			23.836	26.631		23.619	25.163	26.703	24.677	23.023
d1-COMB- Sca1 HIGH (H)	133								26.533					28.348		28.677	26.054														28.409	28.436						28.838			28.228			27.545	27.743
d1-COMB- Sca1 HIGH (H)	134		28.788		27.922												25.854										27.009				27.756			28.466				28.226							27.263
d1-COMB- Sca1 HIGH (H)	135	24.801			23.799	28.314	27.019	26.005	26.351					24.992			26.732			24.993			23.658	28.053	27.025	26.937	26.071					25.185						25.076			23.919	28.89	27.13	25.889	26.201
d1-COMB- Sca1 HIGH (H)	136	23.039			24.09	25.969		23.661	24.977					24.103			24.025			23.156			24.14	26.019		23.389	24.455					24.044			24.047			23.564			24.481	25.684		23.371	24.95
d1-COMB- Sca1 HIGH (H)	137	26.721			23.512			25.564	26.189			24.992		25.765			27.47			27.235			23.511			25.012	26.776			25.027		25.543			27.08			26.673			23.644			25.164	25.497			24.524
d1-COMB- Sca1 HIGH (H)	138	22.994			24.045	25.924		23.616	24.932					24.058			23.98	29.789		23.111			24.095	25.974		23.344	24.41					23.999			24.002			23.519			24.436	25.639		23.326	24.905
d1-COMB- Sca1 HIGH (H)	139	22.103				25.994	25.969	24.532	24.383			25.808		24.59			24.446			22.003				25.667	25.948	23.757	24.501			25.842		24.365			24.667			22.488				25.37	25.267	23.944	24.395			26.507
d1-COMB- Sca1 HIGH (H)	140	23.447	28.475		24.181	26.479	27.085	26.666	26.278			26.897		24.84	26.479		26.829			23.233			23.881	26.919	26.802	26.234	25.81			26.759		25.18	26.576		26.352		29.481	23.348	28.395		24.173	26.111	27.538	26.883	26.367			26.772
d1-COMB- Sca1 HIGH (H)	141	22.163	27.544		23.405	26.581	26.781	24.358	23.786			25.954		24.189			23.944		29.455	21.936	27.894		23.758	26.9	27.017	24.412	23.425			25.882		23.61			24.407		29.772	21.947	27.84		23.324	26.537	26.933	23.967	23.535			25.454
d1-COMB- Sca1 HIGH (H)	142	23.673			24.549	25.951		25.01	24			25.994		23.74	28.973		23.957			24.059			24.385	25.709		25.115	24.67			26.228		23.238	28.561		23.905			23.556			24.514	25.813		25.295	24.383			26.424
d1-COMB- Sca1 HIGH (H)	143	23.142			25.193	26.932	25.948	22.501	25.12					23.905			24.345	27.293	27.571	22.858			25.359	27.156	25.947	22.589	24.765					24.21			23.976	27.733	27.424	23.108			25.725	27.327	25.754	22.512	25.206
d1-COMB- Sca1 HIGH (H)	144	25.485	29.234		23.358	28.434		24.52	24.511			26.333		27.062			20.321		26.523	25	29.2		23.146	28.079		24.471	24.386			26.938		26.808			20.552		26.908	24.841			23.439	28.353		24.22	24.515			26.815
d1-COMB- Sca1 HIGH (H)	145	25.495	26.986		27.288	27.227							26.017	26.568	25.778				29.605	25.632	26.891		27.839	27.5					27.222		25.683	26.703	26.185				29.522	25.366	27.093		27.06	27.526							26.467
d1-COMB- Sca1 HIGH (H)	146	26.611	27.73				25.657	27.591						26.194	26.22					26.987	28.324				25.239	27.731						26.584	26.455					27.019	28.102				25.275	27.811
d1-COMB- Sca1 HIGH (H)	147	23.658			24.534	25.936		24.995	23.985			25.979		23.725	28.958		23.942			24.044			24.37	25.694		25.1	24.655			26.213		23.223	28.546		23.89			23.541			24.499	25.798		25.28	24.368			26.409
d1-COMB- Sca1 HIGH (H)	148	22.553	26.092		26.36	25.277	25.786	26.811	24.902			26.107		27.428	25.953		24.331			23.148	26.802		26.827	25.805	25.622	26.121	25.071			25.705		27.659	25.786		23.88			22.6	26.822		26.428	25.68	25.637	26.319	24.847			25.844
d1-COMB- Sca1 HIGH (H)	149	25.256	28.066		23.941	24.316	27.485	23.584	26.785							28.479	24.801			25.222			23.257	24.362	27.504	23.369	26.896					27.405			24.938			25.544			23.613	24.285	27.055	23.749	27.174
d1-COMB- Sca1 HIGH (H)	150	24.042	26.069		23.611	25.901	26.276	24.668	22.759					24.301		28.553	24.692			24.458	26.093		23.155	25.578	26.252	24.539	22.68					24.029			24.348			23.791	26.586		23.574	25.118	26.658	24.632	22.978
d3-COMB- Sca1 LOW(L')	151		23.802		23.931				23.707					25.896	25.485	25.099	24.302		26.035		23.973		24.733				24.272					26.802	25.459	25.295	24.017		25.761		23.745		24.108				23.892
d3-COMB- Sca1 LOW(L')	152				25.994			25.996	25.85					25.454									25.839			25.337	25.491					25.229									25.223			25.881	25.649
d3-COMB- Sca1 LOW(L')	153	25.692	24.556		26.347	25.155		26.856	24.853					26.01		26.346	24.505		28.051	25.637	24.411		26.513	25.594		26.998	25.326					25.69		26.164	24.898		27.866	25.898	24.743		26.776	25.751		26.644	25.141
d3-COMB- Sca1 LOW(L')	154	27.037	25.587		26.919	27.027			25.847				26.584	25.659			24.018			27.393	25.694		26.189	26.128			25.711				26.872	25.568			24.171			27.302	25.922		27.01	26.189			25.899				26.936
d3-COMB- Sca1 LOW(L')	155		25.73		27.476	27.143		25.371	24.823							26.071	26.15		25.903		25.73		27.172	27.533		25.205	24.704					26.813		25.559	26.033		26.153		26.024		27.196	26.455		25.12	24.613
d3-COMB- Sca1 LOW(L')	156		27.455		25.962			25.467	25.956					25.879		27.163	24.168				27.647		26.016			25.013	25.168					26.281		27.66	24.895	28.826			27.614		26.715			25.017	25.974
d3-COMB- Sca1 LOW(L')	157		23.877		26.455	27.195		24.845	24.21					25.755		25.832	23.211		28.566	27.101	24.375		26.131	27.55		25.041	24.265					25.624		25.97	23.825			27.592	24.049		26.979	27.896		25.639	24.447
d3-COMB- Sca1 LOW(L')	158	25.726	23.564		25.345			26.68	24.63	26.633			28.184	24.667		27.021	25.406		25.811	26.077	23.43		25.919			26.567	24.313	26.396			28.64	24.753		26.441	25.406		25.167	25.751	23.402		25.462	0.105		26.049	24.495	26.235			28.447
d3-COMB- Sca1 LOW(L')	159		25.067						24.025					26.157		27.935					24.842						24.77					25.658		27.496					25.101						24.731
d3-COMB- Sca1 LOW(L')	160		25.825						25.851				26.052	24.543		27.95					25.633						25.637				26.004	24.101		27.262					25.857						25.275				26.102
d3-COMB- Sca1 LOW(L')	161		28.16				27.732		25.214												27.453				27.713		25.204					28.425							27.233						25.01
d3-COMB- Sca1 LOW(L')	162	26.343	25.236		24.741	25.413			23.625	26.57		24.476					24.159		27.365	26.357	25.29		25.123	25.569			23.445								24.132		27.317	26.369	25.269		25.147	25.458			23.658
d3-COMB- Sca1 LOW(L')	163		25.979						23.382					25.685		24.475	24.458		26.776		25.896						23.369					25.685		24.475	24.458				26.001						23.358
d3-COMB- Sca1 LOW(L')	164	25.658		25.014	25.825	26.701		24.256	25.2									25.721	27.973	25.687		24.914	26.354	26.344		24.282	25.347									25.785	28.032	25.67		25.214	26.415	26.423		24.321	25.411
d3-COMB- Sca1 LOW(L')	165	26.389	26.011		25.404	27.219		25.277	24.832					27.513		25.897	23.892			26.969	25.972		25.448	27.181		24.942	24.832					27.071		25.668	24.123			26.931	25.716		25.052	27.861		25.256	24.888
d3-COMB- Sca1 LOW(L')	166	28.928	25.688		24.899				25.007	27.398				26.711		25.297	23.66		27.638		25.755		25.134				25.061	27.553				26.207		25.932	23.143		27.621		25.311		25.154				24.912	26.817
d3-COMB- Sca1 LOW(L')	167		24.942		25.096				23.115					24.166	23.999	28.461			23.1		25.012		24.545				23.352					23.936	24.77	28.52	28.076		23.553		25.336		24.779				23.366
d3-COMB- Sca1 LOW(L')	168	26.443	25.503		25.131			25.874	25.019					26.787		26.246	23.464			26.406	25.799		25.15			26.482	24.871					26.07		25.971	23.034			25.999	26.002		25.177			26.17	25.367
d3-COMB- Sca1 LOW(L')	169	25.131	25.375		24.797	25.387			24.881					24.545		25.03	22.794			25.291	24.892		24.756	25.543			24.176					24.622			22.868			25.139	24.977		24.862				24.242
d3-COMB- Sca1 LOW(L')	170	26.313	23.571		24.28			24.04	23.785					24.198		26.215	23.599		28.354	26.843	23.735		24.594			24.313	24.121					23.929		26.264	23.305		28.529	26.384	23.574		24.359			24.113	23.509
d3-COMB- Sca1 LOW(L')	171	26.414	27.784		24.751				24.756					24.653					26.737	26.423	27.22		24.855				24.09					25.005					26.437	26.339			24.714				24.289
d3-COMB- Sca1 LOW(L')	172	26.468	25.877		26.029			25.582	25.241					25.576		26.332	24.758			26.925	25.872		26.383			26.171	24.911				27.507	25.586		26.128	24.535			27.07	25.774		26.092			25.255	25.046				26.984
d3-COMB- Sca1 LOW(L')	173		25.168		25.671			26.385	24.727					26.393		25.577	22.959				25.053		24.834			26.168	25.233					26.564		25.804	23.199		28.46		24.732		25.541			26.084	25.199
d3-COMB- Sca1 LOW(L')	174	25.806	25.307		25.821			27.355	25.716					27.603		27.259	24.092			26.33	25.079		25.464			27.197	25.759							26.895	24.49			26.93	24.89		25.458			27.315	25.99
d3-COMB- Sca1 LOW(L')	175		24.824		25.681			26.925	23.99	27.086				25.205		25.085	23.453				24.67		26.042			27.55	24.252	26.763				24.974		24.715	23.646				24.125		25.51			27.148	24.437	27.582
d3-COMB- Sca1 LOW(L')	176		24.49		25.205			27.196	23.165					25.911		25.142	24.25		26.583		24.079		25.598	28.375		27.768	23.769					25.623		24.724	24.315		26.891		24.468		25.665	28.279		27.867	23.408
d3-COMB- Sca1 LOW(L')	177	26.573	25.982		26.134			25.687	25.346				28.325	25.681		26.437	24.863			27.03	25.977		26.488			26.276	25.016				27.612	25.691		26.233	24.64			27.175	25.879		26.197			25.36	25.151				27.089
d3-COMB- Sca1 LOW(L')	178		25.273		25.776			26.49	24.832					26.498		25.682	23.064				25.158		24.939			26.273	25.338					26.669		25.909	23.304		28.565		24.837		25.646			26.189	25.304
d3-COMB- Sca1 LOW(L')	179	28.943	25.703		24.914				25.022	27.413				26.726		25.312	23.675		27.653		25.77		25.149				25.076	27.568				26.222		25.947	23.158		27.636		25.326		25.169				24.927	26.832
d3-COMB- Sca1 LOW(L')	180		25.966		25.393			26.039	24.623				25.659	24.76		24.686	24.432		26.511		25.938		24.65			26.406	24.276				25.513	24.687		25.201	24.616		27.228		25.168		24.828			26.072	24.313				25.402
d3-COMB- Sca1 LOW(L')	181	26.548	25.608		25.236			25.979	25.124					26.892		26.351	23.569			26.511	25.904		25.255			26.587	24.976					26.175		26.076	23.139			26.104	26.107		25.282			26.275	25.472
d3-COMB- Sca1 LOW(L')	182	25.236	25.48		24.902	25.492			24.986					24.65		25.135	22.899			25.396	24.997		24.861	25.648			24.281					24.727			22.973			25.244	25.082		24.967				24.347
d3-COMB- Sca1 LOW(L')	183	26.418	23.676		24.385			24.145	23.89					24.303		26.32	23.704		28.459	26.948	23.84		24.699			24.418	24.226					24.034		26.369	23.41		28.634	26.489	23.679		24.464			24.218	23.614
d3-COMB- Sca1 LOW(L')	184	26.519	27.889		24.856				24.861					24.758					26.842	26.528	27.325		24.96				24.195					25.11					26.542	26.444			24.819				24.394
d3-COMB- Sca1 LOW(L')	185		23.697		23.826				23.602					25.791	25.38	24.994	24.197		25.93		23.868		24.628				24.167					26.697	25.354	25.19	23.912	29.761	25.656		23.64		24.003				23.787
d3-COMB- Sca1 LOW(L')	186				25.889			25.891	25.745					25.349									25.734			25.232	25.386					25.124									25.118			25.776	25.544
d3-COMB- Sca1 LOW(L')	187	25.587	24.451		26.242	25.05		26.751	24.748					25.905		26.241	24.4	29.262	27.946	25.532	24.306		26.408	25.489		26.893	25.221					25.585		26.059	24.793	29.846	27.761	25.793	24.638		26.671	25.646		26.539	25.036
d3-COMB- Sca1 LOW(L')	188	26.932	25.482		26.814	26.922			25.742				26.479	25.554			23.913			27.288	25.589		26.084	26.023			25.606				26.767	25.463			24.066			27.197	25.817		26.905	26.084			25.794				26.831
d3-COMB- Sca1 LOW(L')	189			25.973	25.8	25.896		26.251	24.101				24.945	26.24		26.676	24.703					26.35	25.46	26.158		26.395	23.832				25.467	26.799		26.285	24.481					26.311	25.738	25.888		26.972	24.01				24.919
d3-COMB- Sca1 LOW(L')	190		22.524		23.932	25.785		28.214	23.709				26.201	25.12		26.562	23.75		25.369		22.435		24.393	26.495		27.401	23.912				25.794	25.409		25.716	23.909		25.214		22.064		24.182	25.957		27.976	23.984				26.033
d3-COMB- Sca1 LOW(L')	191	26.498	26.12		25.513	27.328		25.386	24.941					27.622		26.006	24.001			27.078	26.081		25.557	27.29		25.051	24.941					27.18		25.777	24.232			27.04	25.825		25.161	27.97		25.365	24.997
d3-COMB- Sca1 LOW(L')	192	25.541	25.042		25.556			27.09	25.451					27.338		26.994	23.827			26.065	24.814		25.199			26.932	25.494							26.63	24.225			26.665	24.625		25.193			27.05	25.725
d3-COMB- Sca1 LOW(L')	193		23.616		24.549	25.042			24.379	29.422				26.457		25.939	23.252		25.511		23.961		24.849	25.651			24.015	28.937			27.593	26.818		26.273	23.072		26.129		23.956		24.818	25.198			24.718	29.146
d3-COMB- Sca1 LOW(L')	194	25.434	26.238		27.643				25.899					25.433			24.004			26.002	26.415		27.825				25.326					25.126			24.117			25.593	25.976						25.682
d3-COMB- Sca1 LOW(L')	195		25.625		27.371	27.038		25.266	24.718							25.966	26.045	29.547	25.798		25.625		27.067	27.428		25.1	24.599					26.708		25.454	25.928		26.048		25.919		27.091	26.35		25.015	24.508
d3-COMB- Sca1 LOW(L')	196		27.35		25.857			25.362	25.851					25.774		27.058	24.063				27.542		25.911			24.908	25.063					26.176		27.555	24.79	28.721			27.509		26.61			24.912	25.869
d3-COMB- Sca1 LOW(L')	197		23.772		26.35	27.09		24.74	24.105					25.65		25.727	23.106		28.461	26.996	24.27		26.026	27.445		24.936	24.16					25.519		25.865	23.72			27.487	23.944		26.874	27.791		25.534	24.342
d3-COMB- Sca1 LOW(L')	198	25.621	23.459		25.24			26.575	24.525	26.528			28.079	24.562		26.916	25.301		25.706	25.972	23.325		25.814			26.462	24.208	26.291			28.535	24.648		26.336	25.301		25.062	25.646	23.297		25.357			25.944	24.39	26.13			28.342
d3-COMB- Sca1 LOW(L')	199		25.281						24.239					26.371		28.149					25.056						24.984					25.872		27.71					25.315						24.945
d3-COMB- Sca1 LOW(L')	200		25.06		25.563			26.277	24.619					26.285		25.469	22.851				24.945		24.726			26.06	25.125					26.456		25.696	23.091		28.352		24.624		25.433			25.976	25.091
d3-COMB- Sca1 HIGH (H)	201	25.415			26.662			24.438	24.397			26.648		24.774	27.239	26.323	23.314			25.457			26.658			24.325	24.191			26.685		24.785		26.248	22.862	27.777		25.457			26.654			24.088	24.452
d3-COMB- Sca1 HIGH (H)	202								24.868	28.519					26.365												24.67																		24.752
d3-COMB- Sca1 HIGH (H)	203				26.365														24.758				26.329														24.785				26.357
d3-COMB- Sca1 HIGH (H)	204	23.875			24.125			23.784	23.142			24.201		22.202		26.287	24.452	27.91		23.966			24.214			23.783	23.149			24.234		22.036		26.368	24.514	27.963		23.354			23.821			23.784	23.165			24.351
d3-COMB- Sca1 HIGH (H)	205	26.641	25.078			26.241	25.791	25.452	25.146								24.896		25.441	26.764	25.031	25.867	26.678	26.125	25.443	25.335	25.149			28.731		28.961		26.221	24.851		25.724	26.845	24.932	25.94	26.718	26.096	25.835	25.454	25.156			28.536	27.972
d3-COMB- Sca1 HIGH (H)	206						24.533	26.451	25.154					25.964		28.507		24.498	27.422					27.523	24.98	26.025	25.736					26.012		28.111	25.601	24.644	27.495					27.681	25.54	26.441	25.076
d3-COMB- Sca1 HIGH (H)	207	24.68			24.754			25.004	24.183											24.516			24.806			24.959	24.147											24.519			24.237			24.678	24.397
d3-COMB- Sca1 HIGH (H)	208				24.805				24.286														24.698				24.779														25.053				24.574
d3-COMB- Sca1 HIGH (H)	209					25.698	24.344	25.417	25.043								28.418		25.81					24.833	24.284	25.649	25.509										25.553					25.023	24.85	25.123	25.632
d3-COMB- Sca1 HIGH (H)	210				25.704									29.4									25.744																		25.652				28.857
d3-COMB- Sca1 HIGH (H)	211								25.671														29.421				26.018									28.214									26.096
d3-COMB- Sca1 HIGH (H)	212						24.749	25.159				24.198		24.727	24.613	23.716					29.06				24.47	25.253				24.103		25.169		23.99									24.298	25.121				24.461
d3-COMB- Sca1 HIGH (H)	213	27.039	27.395	27.31	25.441		26.055	27.73	24.586					24.605			23.461			26.996	27.942	27.036	25.424		26.715	27.536	24.88					24.474			23.579			27.521	27.241	27.424	25.815		26.569	27.565	24.979
d3-COMB- Sca1 HIGH (H)	214	27.842	27.97		27.846	27.402	26.392	26.908	25.548					25.139			23.383			28.043	27.749		27.683	27.349	26.177	26.04	25.856					24.444			23.627				27.491		27.686	27.012	26.069	26.343	25.118
d3-COMB- Sca1 HIGH (H)	215		26.851		26.266			25.682	23.983					24.638		27.228	23.456		26.844		26.565		26.44			25.276	24.535					24.517		27.462	23.43		26.871		26.304		26.273			25.726	24.146
d3-COMB- Sca1 HIGH (H)	216		27.003		24.521				26.066				25.249	26.881		26.894	23.873		27.176		26.671		24.509				25.571				24.87	26.485		26.628	24.016		26.514		26.888		24.431				25.827				24.85
d3-COMB- Sca1 HIGH (H)	217	26.391	26.754				24.16	26.155	24.932					26.272			23.516			26.118	26.051				24.955	26.098	24.696					26.656			23.008			26.737	26.668				24.898	26.071	24.859
d3-COMB- Sca1 HIGH (H)	218	27.476	25.111		26.324	26.364		27.776	23.854					26.411		27.47	25.289			27.078	25.565		26.75	26.659		27.299	24.401					27.049		27.958	25.403			27.058	25.748		26.226	27.159		27.304	23.7
d3-COMB- Sca1 HIGH (H)	219		25.884		25.946	25.65		24.475	24.08					24.867	27.474	26.54	24.424		25.235		25.948		25.808	25.629		24.275	24.245					24.963	27.032	26.415	24.079		25.081		26.136		25.514	25.795		24.836	24.298
d3-COMB- Sca1 HIGH (H)	220		27.673		25.202				25.533					24.981		27.104	24.978				27.1		25.28				25.365					25.563		27.086	24.957				27.303		25.492				25.178
d3-COMB- Sca1 HIGH (H)	221		26.467		23.688	27.565		25.486	26.072					25.753		26.317	25.122	29.029	29.509		26.852		24.419	27.369		26.208	25.818					25.256		25.393	25.925				26.402		23.863	26.965		25.975	25.148
d3-COMB- Sca1 HIGH (H)	222		26.109		26.919	26.845	24.972		25.51					25.932		28.584	25.149		28.087		26.076		27.405	27.406	25.162		25.66					26.332		27.952	25.09		27.473		26.305		26.974	27.178	25.121		25.056
d3-COMB- Sca1 HIGH (H)	223			25.424	24.128				25.404					27.421			26.19					25.783	24.155				25.014					26.855			26.182					25.42	24.639				25.381
d3-COMB- Sca1 HIGH (H)	224		26.591		25.731	26.655		23.585	24.883					25.63	26.355	25.772	23.803				26.716		25.733	26.422		23.732	24.785					25.902	26.197	26.174	23.601				26.531		25.957	26.331		23.74	24.371
d3-COMB- Sca1 HIGH (H)	225		26.134		26.944	26.87	24.997		25.535					25.957		28.609	25.174		28.112		26.101		27.43	27.431	25.187		25.685					26.357		27.977	25.115		27.498		26.33		26.999	27.203	25.146		25.081
d3-COMB- Sca1 HIGH (H)	226	26.125	24.639		24.781		26.446	24.166	23.274					24.481		25.39	22.816			25.703	24.153		24.662		26.66	24.179	23.112					24.935		25.342	22.746			25.507	24.855		24.545		26.811	23.774	22.982
d3-COMB- Sca1 HIGH (H)	227				24.866	26.357	21.736		23.825			23.154		22.785		27.443		26.98						26.325	21.984		24.134			23.023	27.067	22.457		26.827		27.364					24.506	26.83	21.332		23.875			23.099
d3-COMB- Sca1 HIGH (H)	228				23.02			22.365						22.747		22.762			25.654	28.511						22.375						22.741		22.624	27.369		25.683				22.891			22.136
d3-COMB- Sca1 HIGH (H)	229	24.655			24.729			24.979	24.158											24.491			24.781			24.934	24.122											24.494			24.212			24.653	24.372
d3-COMB- Sca1 HIGH (H)	230	25.011	23.579		24.563	24.99	26.199	25.604				23.063		25.369		27.948	23.907		26.005	25.006	23.698		24.544	24.325	25.588	25.164				23.312		25.458	26.441	27.115	24.023	28.255	26.452	25.675	23.581		24.541	24.606	25.453	25.708				23.091
d3-COMB- Sca1 HIGH (H)	231	25.508	22.761		25.603	26.771	27.407	27.033	27.54		26.855	27.081		24.987	23.966	25.264	26.488	27.307	28.694	24.202	22.479		25.805	26.016	27.206	27.542	27.561	29.761	26.772	27.263		25.275	24.434	25.67	26.191	27.231	28.653	25.046	22.213		26.342	26.351	27.502	27.514	27.3	29.339	26.15	26.354	29.301
d3-COMB- Sca1 HIGH (H)	232				25.204												26.895						25.385			27.093									27.057				29.494		25.168						28.912
d3-COMB- Sca1 HIGH (H)	233		26.978		24.496				26.041				25.224	26.856		26.869	23.848		27.151		26.646		24.484				25.546				24.845	26.46		26.603	23.991		26.489		26.863		24.406				25.802				24.825
d3-COMB- Sca1 HIGH (H)	234							23.346	21.762					25.163		24.804	23.591	28.919								23.568	21.859					25.273		24.943	23.531									23.399	22.22
d3-COMB- Sca1 HIGH (H)	235	24.263	28.071				24.517	24.919	23.018			23.097						26.944	25.612	24.301	27.091				24.13	24.367	22.956			23.153						27.18	25.958	24.647					24.597	24.479	23.084			23.558
d3-COMB- Sca1 HIGH (H)	236	28.793							24.333									26.967					29.125				24.571								28.113	26.839		28.96							24.411
d3-COMB- Sca1 HIGH (H)	237				24.814				24.67														24.526				24.699														24.562				24.797
d3-COMB- Sca1 HIGH (H)	238	25.912	26.341		24.272			24.666									24.649	29.953	27.143	25.848	26.929		24.557			24.209									24.263		27.175	26.171	26.337		24.465			24.762
d3-COMB- Sca1 HIGH (H)	239		25.869		25.634		24.546	25.063	25.41		26.312		26.669	25.704	25.533		25.66		27.334		25.625		25.715		24.61	24.993	24.875		26.789		26.587	26.018	25.399		26.192		27.801		25.7		25.801		24.079	25.448	24.967		26.756		26.406
d3-COMB- Sca1 HIGH (H)	240	26.223	25.344		26.414			27.339	24.866					27.696		29.006	23.623			26.099	25.431		26.062			27.181	25.331					26.902		28.863	23.381			26.977	25.975		26.561			27.178	25.506
d3-COMB- Sca1 HIGH (H)	241				25.995	28.3		25.41	24.033					26.006			23.01		27.999				25.916	28.475		24.772	23.985					26.618			22.619		27.132				26.204	28.531		25.063	23.982
d3-COMB- Sca1 HIGH (H)	242	26.638	25.82		24.966			25.446	24.438					26.52		26.349	24.77		26.183	26.392	26.376		24.878		27.02	25.727	24.662					26.125		26.462	24.362		26.415	26.591	26.087		24.964		27.436	25.938	24.498
d3-COMB- Sca1 HIGH (H)	243		25.979		25.543			27.461	24.959					27.645			26.265	29.124			26.069		25.293			27.601	25.022					27.184			25.854				25.994		25.729			27.619	25.713
d3-COMB- Sca1 HIGH (H)	244		25.909		25.971	25.675		24.5	24.105					24.892	27.499	26.565	24.449		25.26		25.973		25.833	25.654		24.3	24.27					24.988	27.057	26.44	24.104		25.106		26.161		25.539	25.82		24.861	24.323
d3-COMB- Sca1 HIGH (H)	245	26.933	26.702		25.787			26.435	25.611					26.728			23.548			27.643	26.112		25.903			25.608	25.277					26.478			23.571			26.987	26.392		25.295			26.171	25.315
d3-COMB- Sca1 HIGH (H)	246	26.146	26.577		25.672	25.827	26.131	26.216	24.926					26.808		26.466	22.654			26.346	26.007		25.506	25.976	25.5	26.531	24.201					26.129		26.719	23.121			26.576	26.742		26.085	25.432	25.876	26.032	24.929
d3-COMB- Sca1 HIGH (H)	247		25.504		24.403	27.278							24.633	26.064			25.367				24.991		24.894	27.777							24.494	26.27			25.847				25.135		24.072	27.176							24.21
d3-COMB- Sca1 HIGH (H)	248	25.894	26.375		25.094			25.752	25.884					24.576			24.64		28.225	25.432	27.593		25.675			25.885	25.078					24.86			24.191			25.144	26.956		25.753			25.76	25.444
d3-COMB- Sca1 HIGH (H)	249	26.15	24.664		24.806		26.471	24.191	23.299					24.506		25.415	22.841	29.26		25.728	24.178		24.687		26.685	24.204	23.137					24.96		25.367	22.771			25.532	24.88		24.57		26.836	23.799	23.007
d3-COMB- Sca1 HIGH (H)	250	27.567	24.644					24.761	23.411					25.005		26.813	23.597	28.644	25.652	27.763	25.003					24.776	23.762					24.642		26.145	23.269		25.019	27.551	24.757					24.766	23.718
d3-COMB- Sca1 EXTREME HIGH (H')	251		27.151					27.037				29.007		25.635							26.354					27.177				29.105		25.521							26.444					26.623				28.802
d3-COMB- Sca1 EXTREME HIGH (H')	252	25.649			25.25			25.54						24.87			26.181			25.991			25.47			26.089						24.903			26.194			25.925			25.364			25.98
d3-COMB- Sca1 EXTREME HIGH (H')	253		29.075				27.323	25.213	25.163			26.371					24.977								27.267	25.572	25.377			26.34					25.347				29.22				27.349	25.969	25.182			26.379
d3-COMB- Sca1 EXTREME HIGH (H')	254	27.067	27.359		28.737		25.504		24.536					26.593			24.823			27.116	27.381				25.536		25.229					26.602			25.5			27.317	28.033		28.801		25.259		24.873
d3-COMB- Sca1 EXTREME HIGH (H')	255	26.171					23.777		26.645					28.604	28.247		24.936		28.889	25.924					23.502		26.862					28.654	28.195		24.599	28.43		25.85					23.921		27.044
d3-COMB- Sca1 EXTREME HIGH (H')	256	24.994							25.969					25.455			23.822			24.963							26.348					24.854			23.851			25.262							26.502
d3-COMB- Sca1 EXTREME HIGH (H')	257				27.006			27.56									25.351						26.935												25.658						26.8			27.479
d3-COMB- Sca1 EXTREME HIGH (H')	258				27.535																		27.054												27.856						27.334
d3-COMB- Sca1 EXTREME HIGH (H')	259							26.469						27.16		29.948										26.708						27.312			28.319									25.932
d3-COMB- Sca1 EXTREME HIGH (H')	260	25.885															24.597			25.926															24.389			25.843
d3-COMB- Sca1 EXTREME HIGH (H')	261							26.478	26.617																	27.039	27.155							28.163										26.49	26.777
d3-COMB- Sca1 EXTREME HIGH (H')	262	26.41		26.841		27.011	26							29.628	27.671					26.734		26.433		27.476	26.571								27.389					26.703		26.484			26.091
d3-COMB- Sca1 EXTREME HIGH (H')	263	22.145			26.901	24.236	22.335	20.915	22.553			25.715				26.938	22.866	27.24	28.34	22.431			26.614	24.16	22.43	20.955	22.806			25.697				27.449	23.203	27.355	28.39	22.051			26.98	24.163	22.316	20.917	22.445			25.76
d3-COMB- Sca1 EXTREME HIGH (H')	264		26.463				25.546	26.859	27.272								25.217				26.453				25.974	26.627	27.318								25.664				26.037				25.507	26.763	27.122
d3-COMB- Sca1 EXTREME HIGH (H')	265					28.929	24.751										25.807								24.701										26.56								24.694
d3-COMB- Sca1 EXTREME HIGH (H')	266				27.853																		27.304													29.28					27.352
d3-COMB- Sca1 EXTREME HIGH (H')	267		27.881		25.55			24.05				23.812		25.193			23.821				27.137		25.299			24.373				24.096		25.044			24.161						25.399			24.969				24.291
d3-COMB- Sca1 EXTREME HIGH (H')	268		26.863					27.047											27.259		27.379					26.8											27.321		27.566					27.051
d3-COMB- Sca1 EXTREME HIGH (H')	269				26.204			25.668	25.24			25.892		24.973		25.106	24.871						25.77			26.158	25.311			26.061		24.97		24.69	25.185						25.464			25.788	24.787			26.6
d3-COMB- Sca1 EXTREME HIGH (H')	270																															27.148			27.136
d3-COMB- Sca1 EXTREME HIGH (H')	271	24.926			26.702		26.14	27.114	26.904								25.58			25.079			26.673		26.635	26.766	26.849								25.704			25.087			27.282		26.194	26.594	27.432
d3-COMB- Sca1 EXTREME HIGH (H')	272		28.129		25.798			24.298	25.217			24.06		25.441			24.069				27.385		25.547			24.621	25.423			24.344		25.292			24.409						25.647			25.217	25.685			24.539
d3-COMB- Sca1 EXTREME HIGH (H')	273		28.151				25.858							26.262							27.814				25.359							26.34							28.103				25.872
d3-COMB- Sca1 EXTREME HIGH (H')	274	25.263					24.065	26.557	24.057								26.062		27.582	25.212					24.555	26.907	24.406								26.415		27.694	25.265					24.186	26.405	24.138
d3-COMB- Sca1 EXTREME HIGH (H')	275					29.139	25.458							27.227			25.947								25.373							27.194			25.947								24.976
d3-COMB- Sca1 EXTREME HIGH (H')	276						25.097	27.427									24.779								25.698	27.771									24.527								25.534	27.508
d3-COMB- Sca1 EXTREME HIGH (H')	277		27.554						26.398								24.277				26.81						26.329								24.672										26.615
d3-COMB- Sca1 EXTREME HIGH (H')	278		27.462		27.874									26.686							27.713		28.468									26.847							27.426		28.089
d3-COMB- Sca1 EXTREME HIGH (H')	279				26.452			25.916	25.488			26.14		25.221		25.354	25.119						26.018			26.406	25.559			26.309		25.218		24.938	25.433						25.712			26.036	25.035			26.848
d3-COMB- Sca1 EXTREME HIGH (H')	280								26.707								24.825										26.763								25.522										26.899
d3-COMB- Sca1 EXTREME HIGH (H')	281						25.806																		25.806																29.041		26.29	29.289
d3-COMB- Sca1 EXTREME HIGH (H')	282								28.82								26.592										28.438								25.821
d3-COMB- Sca1 EXTREME HIGH (H')	283				26.157			26.12	28.887								28.242						26.552			26.254									28.064						26.852			26.03	29.089
d3-COMB- Sca1 EXTREME HIGH (H')	284				26.427			24.741	25.813					25.193			24.8						26.993			25.097	25.777					25.356			24.117						26.411			24.792	26.29
d3-COMB- Sca1 EXTREME HIGH (H')	285		26.902		25.247		26.848					25.646			27.223						26.554		25.516		26.866					25.886			26.979						27.157		25.773		26.665					26.255
d3-COMB- Sca1 EXTREME HIGH (H')	286		26.304				25.387	26.7	27.113								25.058				26.294				25.815	26.468	27.159								25.505				25.878				25.348	26.604	26.963
d3-COMB- Sca1 EXTREME HIGH (H')	287						26.847	28.938									26.348								27.086										26.116								26.758	28.12
d3-COMB- Sca1 EXTREME HIGH (H')	288				25.912												26.262						26.591												26.526						26.168
d3-COMB- Sca1 EXTREME HIGH (H')	289						28.103	27.251									25.719								28.011	27.177									26.451			28.192					28.558	27.599
d3-COMB- Sca1 EXTREME HIGH (H')	290	26.908	27.2		28.578		25.345		24.377					26.434			24.664			26.957	27.222				25.377		25.07					26.443			25.341			27.158	27.874		28.642		25.1		24.714
d3-COMB- Sca1 EXTREME HIGH (H')	291	26.012					23.618		26.486					28.445	28.088		24.777		28.73	25.765					23.343		26.703					28.495	28.036		24.44	28.271		25.691					23.762		26.885
d3-COMB- Sca1 EXTREME HIGH (H')	292				26.957	27.111	24.62							26.462			24.534						27.696	27.163	24.29							26.722			24.806						27.148	27.147	24.603
d3-COMB- Sca1 EXTREME HIGH (H')	293	25.848				27.093	24.873	25.72	29.325			26.936		26.043			26.153	28.698		26.107				26.828	25.005	24.918				26.952		6.125			26.175	29.108		25.573				27.314	24.453	25.167				26.802
d3-COMB- Sca1 EXTREME HIGH (H')	294								25.731						28.009												25.765						28.177												26.239
d3-COMB- Sca1 EXTREME HIGH (H')	295	21.986			26.742	24.077	22.176	20.756	22.394			25.556				26.779	22.707	27.081	28.181	22.272			26.455	24.001	22.271	20.796	22.647			25.538				27.29	23.044	27.196	28.231	21.892			26.821	24.004	22.157	20.758	22.286			25.601
d3-COMB- Sca1 EXTREME HIGH (H')	296				26.211		25.291	25.983	25.895					27.12			26.008						26.958		25.341	26.107	26.256					27.066			26.864						26.223		25.704	25.643	26.478
d3-COMB- Sca1 EXTREME HIGH (H')	297							26.439	27.909					27.134			25.731	28.152								26.241	27.438					26.683			25.677									26.663	27.441
d3-COMB- Sca1 EXTREME HIGH (H')	298		27.442						26.086					27.038			25.034				27.38						26.457					27.603		29.05	25.684	28.069			26.91						25.709
d3-COMB- Sca1 EXTREME HIGH (H')	299	26.116															24.828			26.157															24.62			26.074
d3-COMB- Sca1 EXTREME HIGH (H')	300	25.649															24.361			25.69															24.153			25.607
d6-COMB- Sca1 LOW (L)	301	24.785	28.822		27.395			24.785	27.052			29.368		25.657						24.799			27.078			25.126	27.156					25.297						24.951			27.07			24.875	27.236
d6-COMB- Sca1 LOW (L)	302	22.3845	29.713				22.9515	24.785				26.2195		25.187			24.458	27.581		22.1625	29.728				23.3535	24.859				27.007		24.986			24.632	27.458								24.963
d6-COMB- Sca1 LOW (L)	303	24.512			27.487									25.536			25.606			24.785			27.146									25.785			25.425			24.67
d6-COMB- Sca1 LOW (L)	304	23.775	27.607		25.148	27.19		23.882	24.431				28.433	22.105		27.709	22.262	27.452	26.22	23.268	27.533		24.736	27.493		24.09	24.136					22.145		28.192	22.347	27.184	26.235	23.734	27.648		24.711	27.186		24.298	24.195
d6-COMB- Sca1 LOW (L)	305	24.152					21.796	24.875	26.188					23.926			24.186		27.246	24.206	28.745		27.553		21.999	24.951	26.299					24.063		28.706	24.382		27.354	24.091	29.084		27.029		21.924	25.012	26.586
d6-COMB- Sca1 LOW (L)	306	26.68	29.543		27.139	27.15	23.31	27.41	25.985			26.353		25.041			25.622			27.446	28.7			27.236	23.09	27.051	26.269			27.015		24.941			25.486			27.113			27.078		23.292	27.47	25.325			26.45
d6-COMB- Sca1 LOW (L)	307	23.322	28.559		27.466		25.052	25.503	26.542			21.593		24.014			25.55		27.452	23.411	28.32		27.563		25.544	25.547	26.223			22.086		23.671			25.44		27.653	23.218			27.43		24.734	25.647	26.578			22.233
d6-COMB- Sca1 LOW (L)	308	24.727			27.41				27.244					25.359						24.712			27.195				27.363										28.815	25.025			27.563				27.159
d6-COMB- Sca1 LOW (L)	309	24.987	29.076		27.854	26.97			27.569					24.792			25.53			24.901	29.747		27.671	27.125			27.666					25.215			25.458			25.012	29.615		28.234	27.196			27.416
d6-COMB- Sca1 LOW (L)	310	24.064					21.024	26.541	26.654								25.123			23.721	29.983	28.597	27.563	28.351	21.207	26.365	26.341								24.578		27.001				27.06	28.489		26.704	26.913	29.091
d6-COMB- Sca1 LOW (L)	311	23.266					24.996	24.879	27.865			21.537		24.14			25.32			23.355			27.155		25.488	25.276	27.435			22.03		24.138			22.395		27.425				26.771			24.986	27.215			22.177
d6-COMB- Sca1 LOW (L)	312	24.685			27.635		27.743		26.867					25.536			26.123			24.521	28.907		27.458				27.021					25.211			25.837			24.636	28.901		27.108				26.974
d6-COMB- Sca1 LOW (L)	313	23.715			27.257	28.492	21.409	27.009	27.675			25.807		27.547			25.565			24.06			27.814		21.49	26.121	27.706			25.881		27.614			25.37	28.888		24.134			28.141	28.592	21.58		27.268			25.599
d6-COMB- Sca1 LOW (L)	314	23.987		27.205	26.17		21.352	29.483	25.686					26.774						24.152		27.539	25.675	28.796	21.506		25.813					26.689						24.066		27.448	26.24		21.174	27.931	25.917
d6-COMB- Sca1 LOW (L)	315	24.264				25.84	23.558	27.058				25.868		25.488			26.61	28.042		24.867				25.872	23.97	29.281				25.416		25.385			27.464			23.924				25.998	23.433	27.135				25.668
d6-COMB- Sca1 LOW (L)	316	23.94				27.852	20.9	26.158	28.272					27.709	27.768			29.225	26.564	23.597				28.098	21.083	26.451	28.659					27.748					26.877	24.236				28.365	20.768	26.209	28.369
d6-COMB- Sca1 LOW (L)	317	24.116				28.272	21.76	25.09						26.463			27.463			24.17				28.001	21.963	25.053						26.353			27.385		29.58	24.055					21.888	25.288
d6-COMB- Sca1 LOW (L)	318	24.658			27.098		26.756	24.898	25.85			26.954		24.806			26.726			24.731			27.995	28.392	26.729		25.774			27.201		24.622			26.59	29.855	27.896	24.575			27.237		25.925	23.442	26.21			26.472
d6-COMB- Sca1 LOW (L)	319	23.362			27.244	28.455	21.108	24.596										29.116	27.958	23.109			27.967	27.946	21.202	24.791											27.942	23.302			27.678	28.293	21.339	25.172
d6-COMB- Sca1 LOW (L)	320	24.659				29.335	23.097	24.994	27.332			24.828		25.065					29.511	24.84					23.151	25.275	26.658			24.675		24.59						25.021				29.236	22.611	24.577	26.958			24.936
d6-COMB- Sca1 LOW (L)	321	22.457				25.59	22.275	25.063	28.583			26.293		27.511	25.641		24.777	27.961		22.084				25.635	22.591	24.356	28.793			25.915		27.458	25.014		24.823	27.294		22.005			29.122	25.417	22.747	24.082	28.092			26.534
d6-COMB- Sca1 LOW (L)	322	23.715				25.808	23.967	26.371	26.623			22.989		23.645			24.579	27.024		23.588				26.695	23.98	26.759	26.489			23.134		23.639			24.249	27.198		23.505				26.659	23.421	26.951	26.866			23.322
d6-COMB- Sca1 LOW (L)	323	26.555					23.185	27.285				26.228					25.85			27.321					22.965	26.926	28.231			26.89					26.01			26.988					23.167	27.345	27.598			26.325
d6-COMB- Sca1 LOW (L)	324	24.846			25.337	26.643	22.886	23.778	26.343			25.108		27.433			24.765	28.133		24.299			26.448		23.412	23.649	26.051			24.654		26.929			25.301	27.527		24.489			25.97	26.855	23.313	23.999	26.496			25.232
d6-COMB- Sca1 LOW (L)	325	26.19	29.887		27.24		24.36	25.227	26.603			25.378					25.485		27.542	26.554	29.661				23.842	25.321	26.316			25.42					25.369		27.369	25.937	29.946		27.097		24.041	25.245	26.542			24.875
d6-COMB- Sca1 LOW (L)	326	26.769			26.321		23.399	27.499	27.983			26.442		24.842			24.785			27.535	29.507		26.194		23.179	27.14				27.104		24.754			24.577			27.202			26.153		23.381	27.559	27.894			26.539
d6-COMB- Sca1 LOW (L)	327				26.63				27.125					25.357			24.565						27.152				27.008					24.585			24.46						26.887				27.215
d6-COMB- Sca1 LOW (L)	328	23.792			25.487	26.302	28.74	24.29	23.783					22.442			22.782		26.23	23.741	26.852		24.944	26.458		24.105	25.481				28.344	22.351			22.454		26.481	24.079	26.636		24.569	26.005		24.571	24.63
d6-COMB- Sca1 LOW (L)	329							25.07	25.899			28.728		23.964			25.509									25.207	25.935					24.038			25.412									25.159	26.542
d6-COMB- Sca1 LOW (L)	330	25.785	29.538		26.542	27.483		25.33	27.234					24.654			25.734		27.359	25.892	28.896		26.741	27.452		24.785	27.342					24.365			25.602		27.512	25.741			26.133			24.661	26.773
d6-COMB- Sca1 LOW (L)	331	24.759				27.525		25.156				28.589		22.254			23.913			24.874				27.364		25.456						22.158			24.367			24.881				26.987		25.847
d6-COMB- Sca1 LOW (L)	332	23.629	28.8		26.365		25.408	25.485	27.221			23.318		22.425		29.046	25.629			23.251			26.649		25.188	25.257	27.26			23.311		22.285			25.562			23.341	28.813		26.542		25.757	25.167	26.54			23.38
d6-COMB- Sca1 LOW (L)	333	21.105					22.723	23.049	26.215			23.213		25.333			24.653		27.12	21.421	29.715				22.805	23.214	25.651	28.862		23.431		25.112	28.434		24.156		27.497	21.355					22.418	23.234	26.214			23.245
d6-COMB- Sca1 LOW (L)	334	25.041			28.242	26.856	28.151	26.256	26.023			26.543		24.653			24.727			24.414				26.987	27.069	26.131	25.774			26.785		24.299		29.764	25.558			24.762	28.766		28.452	27.431		26.722	26.321			26.721
d6-COMB- Sca1 LOW (L)	335	21.737			24.987		23.355	22.502				23.845		21.802						22.053			24.393		23.437	23.352				24.063		21.896						21.987			24.856		23.05	22.856				23.877
d6-COMB- Sca1 LOW (L)	336	21.319			24.691	25.201	22.937	23.263	25.433			23.427		22.706			23.629	27.647		21.635			24.629	25.203	23.019	23.428	24.978			23.645		22.793			23.563	27.244		21.569			24.498	24.735	22.632	23.448	25.387			23.459
d6-COMB- Sca1 LOW (L)	337	21.319			24.691	25.201	22.937	23.263	25.433			23.427		22.706			23.629	27.647		21.635			24.629	25.203	23.019	23.428	24.978			23.645		22.793			23.563	27.244		21.569			24.498	24.735	22.632	23.448	25.387			23.459
d6-COMB- Sca1 LOW (L)	338	24.014				27.424	23.456		27.774			25.489		23.575				28.975		23.855				27.681	23.588	27.079	28.235			25.621		23.622				28.34	29.863	23.837				27.385	23.336	27.534				25.514
d6-COMB- Sca1 LOW (L)	339	23.424			26.217	29.429	23.284	25.617	25.99			23.018		22.852			24.571	28.483		22.857	28.702		26.885	29.339	23.418	25.23	26.629			23.604		23.021			24.641	28.984		23.048	28.465		26.569	29.4	23.416	25.645	26.081			23.217
d6-COMB- Sca1 LOW (L)	340	23.214				26.337	23.9	24.991	25.567			23.763		24.151			26.782	28.514		23.613				25.753	23.409	24.979	26.08			24.238		24.719			26.69	28.914		23.548				26.905	23.282	25.279	25.643			23.988
d6-COMB- Sca1 LOW (L)	341	25.366			27.858	29.595	28.476	24.16	27.491			26.868		27.028			25.015			24.739			27.26	29.326	27.394	24.384	27.498			27.11		27.316			24.889	29.964		25.087			27.548			24.468	26.873			27.046
d6-COMB- Sca1 LOW (L)	342	23.587			26.064	26.913	25.317	23.97	27.061			21.858		22.984			25.917		27.752	23.676			26.166	27.634	25.809		27.454			22.351		23.273			26.25		27.746	23.483			25.983		24.999	23.889	26.879			22.498
d6-COMB- Sca1 LOW (L)	343	23.482				27.879	25.261	24.986	27.878			23.171		23.742			26.669	28.033		23.104				27.62	25.041	25.219	28.009			23.164		23.269			27.073	28.029		23.194				27.127	25.61	25.316	28.075			23.233
d6-COMB- Sca1 LOW (L)	344	20.897			24.526	24.933	21.698	22.927	28.166			22.348		22.412	28.379		24.382	28.065		20.79			24.786	25.169	21.669	22.811				22.358		22.513	28.196		24.626	28.902		20.559			24.84	24.422	21.462	22.883	28.014			22.828
d6-COMB- Sca1 LOW (L)	345	22.761			25.815	27.688	22.898	24.206	27.977			23.497		25.221			25.652			22.632			25.615	27.073	22.564	24.842	28.586			23.519		25.619			25.263			22.726			25.777	27.486	22.521	24.24	27.926			23.874
d6-COMB- Sca1 LOW (L)	346	22.984			27.833	26.707	24.521	24.688	26.546			23.79		27.185			25.181	27.897		22.768			27.677	26.413	24.555	24.752	26.716			24.31		26.973			24.337			23.218			27.476	26.33	24.056	24.633	26.884			24.193
d6-COMB- Sca1 LOW (L)	347	26.514			26.74		24.684	27.39				25.702		27.134						26.878			27.304		24.166	27.407				25.744		27.566						26.261			26.782		24.365	27.952				25.199
d6-COMB- Sca1 LOW (L)	348	24.736			27.419				27.253					25.368						24.721			27.204				27.372										28.824	25.034			27.572				27.168
d6-COMB- Sca1 LOW (L)	349	23.706				25.799	23.958	26.362	26.614			22.98		23.636			24.57	27.015		23.579				26.686	23.971	26.75	26.48			23.125		23.63			24.24	27.189		23.496				26.65	23.412	26.942	26.857			23.313
d6-COMB- Sca1 LOW (L)	350	23.77	28.513		25.022	26.308			25.559			23.71		23.654			25.456			24.018			25.126	26.577			25.843			23.607		23.725			25.767			23.671	28.869		24.785	26.345			25.867			23.637
d6-COMB- Sca1 MID (M)	351	24.244			25.231	25.43	21.575	25.981	25.783			26.833								23.907	28.757		25.176	25.575	22.077	25.886				26.732								24.388			25.197	25.357	22.4	25.723	25.682			26.74
d6-COMB- Sca1 MID (M)	352	25.276	28.227		24.036	26.027	25.717	26.205	24.561			26.527		24.174			24.797			25.158			23.7	25.815	25.545	26.407	24.568			26.765		23.987			25.004			25.061	28.452		24.155	25.93	26.158	26.236	24.783			26.888
d6-COMB- Sca1 MID (M)	353	28.698			25.179	28.461			24.327					23.365			24.904						25.15			27.605	24.83					23.325			24.355				28.647		25.178				24.871
d6-COMB- Sca1 MID (M)	354	27.246					25.639	24.797	25.543			26.686		24.785			25.364			26.899					25.253		26.516			27.522		24.828			24.961		28.228	26.746					25.415	25.106	25.892			27.115
d6-COMB- Sca1 MID (M)	355	24.928					27.067	27.563	25.835			24.098		24.785			25.911			25.254	28.649				27.373		25.863			24.068		25.002			25.785			25.412	28.525				27.781	27.712	26.289			24.143
d6-COMB- Sca1 MID (M)	356	22.441	27.972			26.772	22.652	24.499	25.756			23.015		24.563			25.854	29.741		22.391	27.732			25.86	22.67		25.95			23.102		24.876	28.628		25.368			22.354				26.281	22.696	24.456	25.875			22.61	28.559
d6-COMB- Sca1 MID (M)	357	23.052			25.285	24.825	24.595	25.001	26.133								26.093			23.162			25.304	24.578	24.257		26.356								26.252	29.012		22.756	28.629		25.232	24.849	24.273	24.896	26.452
d6-COMB- Sca1 MID (M)	358	23.175				26.781	24.417	24.469	26.499			23.654		24.563		29.081	25.456			23.517				26.523	24.792	24.244	25.921			24.086		24.727			26.078			23.261				26.43	24.714	24.73	26.123			24.462
d6-COMB- Sca1 MID (M)	359	24.131			26.275		25.082	25.47	25.356			24.94		23.06			26.055			23.8	28.771		26.436		24.921	25.327	25.452			24.172		23.421			26.555			23.878	28.763		26.543		24.781	26.004	24.562			24.405
d6-COMB- Sca1 MID (M)	360	22.35				27.319	23.705	26.394				23.125								22.168				27.022	23.612	26.476				23.392								22.35				26.697	24.112	26.952				23.076
d6-COMB- Sca1 MID (M)	361	25.66				28.61	24.089	25.219	24.747			27.006		24.293			26.105			25.814			27.589	28.584	23.918	24.96	24.341			26.481		24.321					29.409	26.016	28.827		27.552	28.064	24.087	25.169	24.563			26.434
d6-COMB- Sca1 MID (M)	362	23.496				27.102	24.738	24.79	24.577			23.975		23.292			26.68		26.636	23.838				26.844	25.113	24.565	24.737			24.407		23.912			27.109		26.704	23.582				26.751	25.035	25.051	24.319			24.783
d6-COMB- Sca1 MID (M)	363	23.917			26.025		24.868	25.256	27.35			24.726		24.32			25.317			23.586			25.557	29.161	24.707	25.113	27.573			23.958		24.614			25.204			23.664			25.515	29.472	24.567	25.79	27.871			24.191
d6-COMB- Sca1 MID (M)	364	22.497			26.507	27.466	23.852	26.541	25.348			23.272		24.393	28.423		25.35		29.552	22.315			26.398	27.169	23.759	26.623	25.483			23.539		24.634	28.512		25.903		29.459	22.497			25.952	26.844	24.259	27.099	25.648			23.223
d6-COMB- Sca1 MID (M)	365	25.496				28.446	23.925	25.055	27.134			26.842		25.441			25.579			25.65				28.42	23.754	24.796	26.668			26.317		25.753			24.878		29.227	25.852				27.9	23.923	25.005	26.841			26.27
d6-COMB- Sca1 MID (M)	366	27.504		26.247			25.897	25.055				26.944					25.849		28.216	27.157		26.232			25.511	24.778	27.721			27.78					25.925		28.148	27.004		26.03			25.673	25.364	28.215			27.373
d6-COMB- Sca1 MID (M)	367	25.951			26.467	29.213		23.334	23.635					26.11			23.251			25.823			26.563	29.069		22.136	23.551					26			23.076			25.198			25.863	29.461		21.984	23.164
d6-COMB- Sca1 MID (M)	368	23.09				25.725	25.489	26.95	25.39			22.949		23.617	27.452		25.975	29.036		23.081				25.879	24.719	26.425	25.833			23.007		23.352	27.535		26.428			23.204				25.091	24.614	26.762	25.504			23.198
d6-COMB- Sca1 MID (M)	369	26.396			25.99	27.794		25.232	25.329					24.759			25.262			25.921			25.58	28.177		25.198	25.292					25.244			24.909			26.6			26.304	28.936		25.511	24.646
d6-COMB- Sca1 MID (M)	370	23.272			26.884	27.551	25.854	26.568	25.207			23.846		23.906	27.498		25.673	27.779		22.619			27.375	27.636	25.181	26.207	25.779			23.872		23.692	27.664		25.898	28.469		23.084			27.063	27.579	25.113	26.355	25.501			24.226
d6-COMB- Sca1 MID (M)	371	22.385			23.641	26.103	22.675	23.279	24.434			23.523		23.405		28.038	26.23	26.944		22.067			23.734	26.401	22.575	23.462	23.848			23.26		23.588		27.803	26.231	26.704		22.262			23.368	26.249	22.994	23.14	23.844			23.302
d6-COMB- Sca1 MID (M)	372	24.607			27.997		26.746	27.242	28.349			23.777		24.895						24.933			28.088	29.731	27.052	27.644	28.266			23.747		24.95						25.091				29.437	27.46	27.391				23.822
d6-COMB- Sca1 MID (M)	373	26.889					25.282	24.44	25.186			26.329		24.428			25.007			26.542					24.896		26.159			27.165		24.471			24.604		27.871	26.389					25.058	24.749	25.535			26.758
d6-COMB- Sca1 MID (M)	374	27.445			27.127		25.838	24.996	26.003			26.885		24.728						27.098	28.612				25.452	24.719	25.785			27.721		24.818			24.82			26.945	28.667		27.236		25.614	25.305	25.414			27.314
d6-COMB- Sca1 MID (M)	375	26.029			27.162			23.412	26.009					23.165					28.727	25.901						22.214	25.896					23.521						25.276	28.673		27.452			22.062	25.551
d6-COMB- Sca1 MID (M)	376	22.757	27.504		25.335	25.392	25.156	26.617	24.413			22.616	28.407	24.198			24.16	28.811		22.748	27.203		25.222	25.546	24.386	26.092	24.406	28.986		22.674		23.913		29.15	24.05	28.7	28.371	22.871			25.12	24.758	24.281	26.429	24.407			22.865
d6-COMB- Sca1 MID (M)	377	26.168	27.901		24.563	27.566		25.004	23.899					23.998			26.342	29.021	28.343	25.693	28.628		24.63	27.949		24.97	23.952					24.462			26.029	28.921	28.489	26.372			24.405	28.708		25.283	23.886
d6-COMB- Sca1 MID (M)	378	23.616	28.864			27.895	26.198	26.912	26.029			24.19				29.027	26.034		29.356	22.963	28.743			27.98	25.525	26.551	25.756			24.216								23.428	27.715			27.923	25.457	26.699	25.628			24.57
d6-COMB- Sca1 MID (M)	379	22.274			25.585	25.992	22.564	23.168	25.354			23.412		25.047			25.156			21.956			25.414	26.29	22.464	23.351	24.913			23.149		25.045			24.966			22.151	29.665		25.335	26.138	22.883	23.029	25.685			23.191
d6-COMB- Sca1 MID (M)	380	24.718			25.201		26.857	27.353	25.452			23.888		24.209			25.096			25.044			25.364		27.163	27.755	24.975			23.858		24.231			25.125			25.202			25.421		27.571	27.502	25.634			23.933
d6-COMB- Sca1 MID (M)	381	24.046				26.497	24.03	26.278	25.862			23.941		24.563			26.321			24.06	29.121			26.955	24.487	26.069	26.372			24.265		24.125			26.125			24.357	28.929			26.581	24.496	26.262	25.768			24.198
d6-COMB- Sca1 MID (M)	382	23.475	27.908		27.281		25.009	25.976	27.365			23.088		25.986		28.369	24.39		28.674	23.535	28.108				24.888	26.028	26.015			23.335		26.11		28.338	25.018		28.538	23.786			27.435		24.702	25.835	27.032			22.806
d6-COMB- Sca1 MID (M)	383	24.59	28.535			25.776	21.921	26.327	25.145			27.179		25.354		29.036	24.389			24.253				25.921	22.423	26.232	24.871			27.078		25.467			24.895	28.737		24.734				25.703	22.746	26.069	25.023			27.086
d6-COMB- Sca1 MID (M)	384	24.034			27.83	25.22	21.365	25.771				26.623								23.697				25.365	21.867	25.676				26.522								24.178			28.001	25.147	22.19	25.513				26.53
d6-COMB- Sca1 MID (M)	385	25.382				26.133	25.823	26.311				26.633		24.981			26.218			25.264				25.921	25.651	26.513				26.871		24.765			25.933			25.167	28.483			26.036	26.264	26.342				26.994
d6-COMB- Sca1 MID (M)	386	21.818				26.149	22.029	23.876	27.452			22.392		23.37			26.369			21.768				25.237	22.047	24.186	27.459			22.479		23.453			26.06			21.731				25.658	22.073	23.833				21.987
d6-COMB- Sca1 MID (M)	387	23.701				26.152	23.685	25.933	26.044			23.596		24.123			25.944			23.715				26.61	24.142	25.724	25.874			23.92		24.67			25.436			24.012				26.236	24.151	25.917	25.812			23.853
d6-COMB- Sca1 MID (M)	388	23.832			25.262		25.366	26.333	25.049			23.445		24.008				28.895		23.892			25.435		25.245	26.385	25.291			23.692		24.391						24.143			25.405		25.059	26.192	25.157			23.163
d6-COMB- Sca1 MID (M)	389	23.157		27.248		27.872	23.278	25.847	27.271											23.284		26.756		27.849	23.315	25.334	26.619											23.488		27.061		28.153	23.169	25.256	27.318
d6-COMB- Sca1 MID (M)	390	23.895				26.433			25.94			23.835		24.488			26.016			24.143				26.702			26.676			23.732		24.144			25.682	29.136		23.796				26.47			26.679			23.762
d6-COMB- Sca1 MID (M)	391	24.369				25.555	21.7	26.106	26.627			26.958								24.032				25.7	22.202	26.011	26.131			26.857						29.668		24.513				25.482	22.525	25.848	26.488			26.865
d6-COMB- Sca1 MID (M)	392	25.401			24.2	26.152	25.842	26.33	25.116			26.652		26.654			24.088	27.617		25.283			24.253	25.94	25.67	26.532	25.233			26.89		26.25			23.566	27.735		25.186			24.162	26.055	26.283	26.361	25.171			27.013
d6-COMB- Sca1 MID (M)	393	22.187	28.343		25.07	26.518	22.398	24.245	25.813			22.761		23.006			23.158	28.654	28.407	22.137			25.617	25.606	22.416	24.555	25.321			22.848		23.115			23.788	28.196	28.542	22.1	28.396		24.759	26.027	22.442	24.202	25.689			22.356
d6-COMB- Sca1 MID (M)	394	24.009					22.382	23.901	27.082			24.989		25.176			25.015	28.909	28.325	24.063				28.071	22.329	24.694	27.274			24.897		25.624			25.517		28.064	23.926				27.392	22.269	24.944	27.28			24.615
d6-COMB- Sca1 MID (M)	395	25.915				28.509	23.886	25.049	25.262											26.283				26.624	24.003	25.628	25.401											25.807				27.755	24.036	25.554	25.21
d6-COMB- Sca1 MID (M)	396	26.7			22.831	25.98		21.967	22.915			26.58		23.245		26.948	22.969	27.641		26.76			22.73	25.492		22.23	23.574			26.765		23.011		26.023	23.213	26.887		26.62			23.013	25.708		22.183	22.81			26.901
d6-COMB- Sca1 MID (M)	397	27.995			27.475		28.564					27.338		26.406			28.396			27.982			27.125		28.591					26.914		26.719						28.215					28.01					27.19
d6-COMB- Sca1 MID (M)	398	23.211	24.759		25.682	24.984	24.754	25.16	24.091					24.82			23.603		27.558	23.321	24.442		25.138	24.737	24.416	24.879	24.691					24.546			23.455	28.836	27.489	22.915	24.427		25.805	25.008	24.432	25.055	24.531
d6-COMB- Sca1 MID (M)	399	22.516				27.485	23.871	26.56				23.291								22.334				27.188	23.778	26.642				23.558								22.516				26.863	24.278	27.118				23.242
d6-COMB- Sca1 MID (M)	400	23.143			26.526		22.427	24.115	25.986					27.977			23.785			22.927			26.128		22.684	23.785	26.124					27.752			23.589			22.712			26.791		22.691	24.234	26.184
d6-COMB- Sca1 HIGH (H)	401	25.557	25.568		27.046	26.199	24.437	21.685	26.379			27.559	28.387	23.121			24.539	27.568		24.939	24.88		26.751	27.546	24.536	21.458	25.871			26.98		22.833			24.589	27.856		25.657	25.096		26.986	25.518	24.628	21.557	26.34			27.706
d6-COMB- Sca1 HIGH (H)	402	24.594			27.159	26.289	23.32	23.304	26.477			25.96		24.498			22.87			24.562			27.328	25.741	23.329	23.542	26.358			26.128		23.755			22.899		28.658	24.305			26.986	25.967	23.291	23.057	26.352			26.138
d6-COMB- Sca1 HIGH (H)	403	26.497				26.378	21.875	23.719	26.452								24.364			26.29				26.386	21.842	23.751	26.455								24.563			26.139				26.452	21.974	23.689	26.442
d6-COMB- Sca1 HIGH (H)	404	24.363	25.63				25.183	25.578	26.421					23.009			24.587			24.413	25.876				25.725	25.369	26.514					22.872			24.556			24.946	25.759				25.355	25.542	26.364
d6-COMB- Sca1 HIGH (H)	405	25.046	25.645		27.252		24.969	21.485	24.976					24.072			22.788		27.563	25.377	25.842		27.234		24.344	21.365	24.811					23.985			23.452		27.73	24.72	25.789		27.214		24.351	21.512	25.57
d6-COMB- Sca1 HIGH (H)	406	24.717			27.168			24.44	26.26					24.228	28.496		24.609			24.92			27.319			24.587	26.453					24.361			24.551			24.733			27.223			24.776	26.441
d6-COMB- Sca1 HIGH (H)	407	21.708			27.056	25.678	22.797	26.542	25.388			22.586		24.386			24.789			21.902			26.93	26.11	22.603	26.452	25.506			22.623		24.356			24.159			21.703			26.896	25.754	22.637	26.385	25.323			22.352
d6-COMB- Sca1 HIGH (H)	408	23.461	26.456		27.067			21.369	25.22							25.455	23.214		27.896	23.438	26.052		26.855			21.596	24.701							25.125	22.94		28.219	23.613	26.754		26.9			21.452	24.939
d6-COMB- Sca1 HIGH (H)	409	21.852					23.321	22.489	26.996			22.036		24.689			24.247			21.997					23.385	22.635	27.009			22.344		24.524			24.536			21.866					23.633	22.542	26.845			21.899
d6-COMB- Sca1 HIGH (H)	410	23.18				26.316	23.821	23.496	25.36								24.587	27.658		23.123				26.598	23.432	23.674	25.233								24.576	27.542		22.674				26.457	23.592	23.653	24.926				28.329
d6-COMB- Sca1 HIGH (H)	411	21.545	24.854		26.548	27.563	23.522	24.563	26.372							26.84	24.369			21.376	23.94		26.058	27.53	23.233	24.653	26.123				28.51			26.785	24.455			21.548	24.765		26.674	27.421	23.486	24.456	25.986
d6-COMB- Sca1 HIGH (H)	412	25.432	27.648		25.36		24.312	25.797	26.958			27.434		28.064			24.431	29.095	27.171	24.814	27.78		24.831		24.411	25.708	26.543			26.855		28.239			23.996		27.562	25.532			24.734		24.503	25.941	26.811			27.581
d6-COMB- Sca1 HIGH (H)	413	24.469					23.195	23.475	24.463			25.835				27.072		28.609		24.437					23.204	23.449	24.586			26.003						28.67		24.18					23.166	23.898	24.865			26.013
d6-COMB- Sca1 HIGH (H)	414	26.622	26.177			25.367	22	22.299	26.481					24.574		26.791	26.578	27.58		26.415	25.922			25.204	21.967	22.683	26.249					24.071		26.721	26.816	28.864		26.264	26.279			25.955	22.099	22.71	25.998
d6-COMB- Sca1 HIGH (H)	415	24.488	24.947		24.209	26.291	25.308	21.75	22.504					23.201		24.974	21.765	26.444		24.538	24.532		23.746	26.251	25.85	20.271	22.112					22.948		24.596	21.49	26.763	28.405	25.071	25.116		24.275	25.993	25.48	20.598	21.917
d6-COMB- Sca1 HIGH (H)	416	25.171					25.094	25.846	28.191					25.577					27.665	25.502					24.469	25.501						25.832					27.263	24.845					24.476	26.067	27.527
d6-COMB- Sca1 HIGH (H)	417	24.463	24.965	23.8	27.033			22.175	24.155					23.562	27.686	25.623	21.323	27.454		24.666	25.266	23.461	27.428			22.111	24.32					23.371	27.12	25.879	21.714			24.479	25.557	23.878	27.086			21.933	24.522
d6-COMB- Sca1 HIGH (H)	418	21.454			22.719	23.384	22.543	23.029	22.576			22.332		21.279		26.53	21.393	28.544	27.976	21.648			23.206	23.358	22.349	22.881	23.177			22.369		21.31		26.704	21.483	28.328	27.615	21.449			23.092	23.474	22.383	23.532	23.188			22.098
d6-COMB- Sca1 HIGH (H)	419	23.207	24.239		24.158			21.917	23.527					23.507		26.932	21.859		25.823	23.184	24.177		23.74			22.409	24.043					23.094		26.889	21.703	29.356	26.438	23.359	24.693		24.467			22.054	23.792
d6-COMB- Sca1 HIGH (H)	420	22.106			24.718	25.045	23.575	23.739	25.094			22.29		21.864		28.785	23.42			22.251			25.354	25.278	23.639	24.17	25.615			22.598		21.733		28.785	23.571			22.12			25.354	25.628	23.887	21.808	25.657			22.153
d6-COMB- Sca1 HIGH (H)	421	23.434	24.388	26.632	21.802	25.118	24.075	21.081	23.591					22.045			20.245	27.894		23.377	24.694	25.862	21.732	25.722	23.686	20.994	23.781					22.223			20.302	27.775		22.928	24.084	26.123	21.81	25.83	23.846	20.713	23.817
d6-COMB- Sca1 HIGH (H)	422	21.799	28.229			24.795	23.776	22.642	24.303					23.528	26.971		23.553			21.63	28.18			24.889	23.487	22.698	24.576					23.426	26.977		23.507	29.11		21.802				25.073	23.74	22.388	24.975
d6-COMB- Sca1 HIGH (H)	423		25.805								27.364				26.388		25.699				25.853								27.459				25.975		25.315				25.718
d6-COMB- Sca1 HIGH (H)	424	22.397	27.635		27.101	26.212	22.964	24.209				26.232		24.361	24.971		26.304	27.347		22.175	27.597		27.155	26.315	23.366	24.356				26.627		24.574	25.473		26.457	27.412		22.281	27.427		27.221	26.247	22.991	23.745				26.943
d6-COMB- Sca1 HIGH (H)	425				25.489			26.374	26.365							26.097	24.45		27.415				25.353			26.554	26.342							26.458	24.595		27.154				25.654			26.42	25.968
d6-COMB- Sca1 HIGH (H)	426		25.613		25.489	26.458	25.957	23.782	25.785			26.097	28.642	23.364				27.689			25.678		25.39	26.754	26.348	23.458	26.054			26.822		23.727				27.158			25.83		25.26	26.459	26.45	23.177	25.834			26.67
d6-COMB- Sca1 HIGH (H)	427	26.114			26.189			24.028	26.418			26.346		24.187			23.542			25.841			26.321			23.981	26.394			26.87		23.977			23.507			25.664			25.987			24.125	25.967			27.085
d6-COMB- Sca1 HIGH (H)	428	22.918	26.69		27.654		23.519	23.584	26.515			24.609		24.996		26.964				22.806	26.356		27.635		23.263	23.457	26.785			24.773		25.452		27.001				22.71	26.439		27.376		23.185	23.445	26.45			24.221
d6-COMB- Sca1 HIGH (H)	429	21.778					21.666	22.487	25.393								24.563			21.637					21.582	22.368	25.456					28.192			24.44			21.843					21.336	22.398	25.394
d6-COMB- Sca1 HIGH (H)	430	22.049	25.754			27.005	21.552	23.64	26.557					23.97			22.896	28.122		22.142	25.809		26.542	26.767	21.656	23.252	26.45					23.897			23.009	27.845		21.903	25.705		27.136	26.715	21.671	23.288	27.123
d6-COMB- Sca1 HIGH (H)	431	23.305			27.175	26.602	26.196	23.245	26.75			26.23		24.563			22.753			23.959			26.548	26.896	25.957	23.309	26.369			26.146	28.461	24.658			23.123			23.147			26.458	26.785	26.884	23.541	26.35			26.039
d6-COMB- Sca1 HIGH (H)	432	23.721			27.369		24.291	23.301	24.366			25.478		23.785			22.755		27.367	23.728			26.737		24.12	23.485	24.345			25.932		24.003			22.191		27.49	23.684			27.244		23.813	23.344	24.406			26.135
d6-COMB- Sca1 HIGH (H)	433	25.811	25.773			26.496		25.159	26.582					23.785			24.369			26.159	25.69			26.473		25.636	26.456	29.043				23.74			24.55			25.335	25.756			26.422		25.485	26.554
d6-COMB- Sca1 HIGH (H)	434	23.952			26.389		24.071	24.336	25.785			27.098		24.785			25.176	27.106		23.458			26.542		24.717	24.563	25.636			27.469		24.634			25.543	27.278		23.747			26.894		23.714	24.452	25.456			27.447
d6-COMB- Sca1 HIGH (H)	435	23.419	25.596			27.074	23.307	23.452	25.896					24.56			23.754			24.013	25.846			26.854	23.148	23.367	26.159					24.655			23.293			23.221	26.004			26.785	22.649	23.365	26.119
d6-COMB- Sca1 HIGH (H)	436							23.125	27.443					23.456		26.346										23.061	27.329					23.635		25.68										22.896	27.432
d6-COMB- Sca1 HIGH (H)	437		25.077		26.512	25.106	25.61	23.708	25.544			25.75		24.071			23.773		27.814		25.518		26.716	25.609	26.001	23.435	25.718			26.475		24.597			23.468		28.127		24.781		26.658	25.497	26.103	23.644	25.349			26.323
d6-COMB- Sca1 HIGH (H)	438	25.767			25.493	29.317		23.125	26.349			25.999		24.411			25.815			25.494			25.023	29.276		23.055	26.477			26.523		24.568			25.417			25.317			25.346	29.501		23.178	26.279			26.738
d6-COMB- Sca1 HIGH (H)	439	23.265			25.728	28.132	23.866	23.823	26.207			24.956		22.938			26.807			23.153			25.173	28.166	23.61	24.058	25.996			25.12		22.615			26.002			23.057			24.792	27.964	23.532	24.399	25.736			24.568
d6-COMB- Sca1 HIGH (H)	440	22.125		25.52		26.756	22.013	25.338	26.009								24.747			21.984		25.092		27.075	21.929	24.955	25.401								24.808			22.19		24.955		26.522	21.683	25.502	25.83
d6-COMB- Sca1 HIGH (H)	441	22.396		24.946		27.271	21.899	25.808	27.311								25.176			22.489		24.269		27.47	22.003	26.336	27.228								24.763	29.161		22.25		24.568		27.061	22.018	25.973	27.144
d6-COMB- Sca1 HIGH (H)	442	22.894			27.309	25.926	25.785	24.372	26.703			25.819		26.999	27.801		25.246			23.548			27.685	25.713	25.546	23.854	27.39			25.735		27.431			24.806			22.736			27.879	25.879	26.473	24.083	26.975			25.628
d6-COMB- Sca1 HIGH (H)	443	23.31				29.084	23.88	26.518	27.591			25.067		24.764	27.606		25.285	29.179		23.317					23.709	26.541	27.218			25.521		24.968	27.847		25.893			23.273				29.379	23.402	26.637	26.808			25.724
d6-COMB- Sca1 HIGH (H)	444	25.4						24.456	25.408			26.345		26.391			25.492			25.748						24.064	25.539			26.823		26.097			24.853	29.933		24.924						24.216	25.561			26.086
d6-COMB- Sca1 HIGH (H)	445	24.363		25.397	27.491	26.257	24.482	24.371	25.33			27.509		25.908			27.12			23.869		25.219	27.813	26.289	25.128	24.616	25.639			27.88		25.694	27.852		27.471	28.025		24.158		24.904	27.073	26.557	24.125	24.853	25.269			27.858
d6-COMB- Sca1 HIGH (H)	446	23.83				27.613	23.718	28.113	26.422											24.424				27.04	23.559	28.192	26.753						27.009					23.632				27.418	23.06	28.058	26.532
d6-COMB- Sca1 HIGH (H)	447	23.042	26.814		27.778		23.643	23.708	26.639			24.733		25.12		27.088				22.93	26.48		27.759		23.387	23.581	26.909			24.897		25.576		27.125				22.834	26.563		27.5		23.309	23.569	26.574
d6-COMB- Sca1 HIGH (H)	448	23.018				26.711	22.302	23.884	24.474					23.293			24.041		27.103	22.802				26.654	22.559	24.043	24.564					22.904	27.986		24.043	28.212	27.387	22.587				26.473	22.566	23.614	24.703
d6-COMB- Sca1 HIGH (H)	449	23.651					24.221	26.859	27.932			25.408		25.105	27.947		25.626			23.658					24.05	26.882	27.559			25.862		25.309	28.188		26.234			23.614					23.743	26.978	27.149			26.065
d6-COMB- Sca1 HIGH (H)	450	22.951			26.821	26.248	25.842	22.891	26.396			25.876		24.209			22.399			23.605			26.194	26.542	25.603	22.955	26.015			25.792	28.107	24.304			22.769			22.793			26.104	26.431	26.53	23.187	25.996			25.685
[truncated: 25 more columns]

## Sheet: alpha, beta, gamma and control
		There are 3 tech replicates/assay for each sample
		Technical Replicate 1																		Technical Replicate 2																		Technical Replicate 3
		Pu.1	Hba-a1	Egr2	ckit	TBP	CD11b	Runx1	Scl	EpoR	CEBPa	Gfi1	Eklf	cMyb	cJun	Fog1	Gata2	Fli1	Gata1	Pu.1	Hba-a1	Egr2	ckit	TBP	CD11b	Runx1	Scl	EpoR	CEBPa	Gfi1	Eklf	cMyb	cJun	Fog1	Gata2	Fli1	Gata1	sfpi1	Hba-a1	Egr2	ckit	TBP	CD11b	Runx1	Scl	EpoR	CEBPa	Gfi1	Eklf
EML-D0 - Scal+/CD11b-	1	22.859			21.075	24.806		21.856	22.026	25.654				22.47		23.395	23.013	27.561		22.913			21.197	24.663		21.471	22.433	26.526				23.058		23.122	23.121	26.961		22.888			21.08	24.3		21.764	22.215	26.111
EML-D0 - Scal+/CD11b-	2	22.611			19.902	24.312	25.233	21.204	20.592	26.459		25.199		21.608		24.25	22.067	25.719		22.166			20.522	24.036	24.65	21.244	20.005	26.926		25.116		21.909		23.837	21.813	25.198		22.201			20.295	23.906	26.116	21.299	20.037	26.62		25.105
EML-D0 - Scal+/CD11b-	3	23.324		25.7	20.035	25.508	26.802	21.776	20.794					21.531		23.272	21.967	25.56		23.825		26.616	20.204	27.275	25.14	21.786	20.769					21.678		23.941	21.731	24.977		23.586		26.66	20.201	25.967	25.238	21.527	21.023
EML-D0 - Scal+/CD11b-	4		24.679		20.173	26.259	25.285	21.956	22.17			27.145		21.631	26.658	25.331	21.749	24.467		23.156	25.719		20.414	25.257	25.364	20.722	20.993			26.106		21.571	28.86	23.748	21.56	26.102		23.483	26.216		20.378	25.894	26.128	21.595	22.029			26.516
EML-D0 - Scal+/CD11b-	5	25.06	27.495		20.561	23.996		22.327	21.137					21.447		23.678	20.554	25.277	27.127	25.123	28.078		20.605	23.948		22.8	21.19					21.212		23.285	20.383	25.39	28.871	24.633	26.651		20.617	24.287		22.234	21.035
EML-D0 - Scal+/CD11b-	6	23.095	27.028		20.52	25.814		21.323	20.751		25.964	27.668		22.2	26.194	23.556	22.027	25.855	25.463	23.335	27.39		20.883	25.913		21.095	20.412			27.445		22.487	27.566	23.738	21.671	27.103	25.173	23.378	27.11		20.612	26.016		21.247	20.86			26.454
EML-D0 - Scal+/CD11b-	7	23.258			20.553	24.968		21.097	20.927					20.572		25.249	21.109	24.905	27.889	23.544			20.683	25.811		21.162	20.991		26.72	28.606		20.588		24.618	21.055	24.876	27.635	23.262			20.701	25.487		20.872	21.047			29.51
EML-D0 - Scal+/CD11b-	8	22.48			20.786	25.226	26.531	22.263	21.937					21.541		23.637	21.096	25.392		22.234			20.795	24.595	26.339	22.151	21.738					21.691		23.926	20.864	25.646		22.54			20.672	25.124	26.117	21.864	21.598
EML-D0 - Scal+/CD11b-	9	23.466			21.604	24.858		22.006	23.004					21.858		24.778	21.982	25.834		23.758			21.604	24.699		22.129	22.745					22.016		24.264	22.129	24.9	27.294	24.081			21.366	24.369		21.694	23.199
EML-D0 - Scal+/CD11b-	10	22.864	28.859		21.206	24.008		21.031	21.652	27.45				20.579		23.634	22.107	27.073	26.723	22.889	26.873		21.728	24.51		20.393	21.013	27.141				20.563		23.284	21.211	26.837	27.365	22.771	29.558		21.796	23.708		20.018	20.674	26.181
EML-D0 - Scal+/CD11b-	11	23.637		26.128	21.364	25.51		23.92	22.291			24.376		21.885	27.151	27.111	20.76	27.923		23.34		26.198	21.235	24.898		23.796	21.826			24.785		21.913	28.663	27.546	20.613	27.611		23.538		26.604	20.868	24.148		23.249	22.148			24.553
EML-D0 - Scal+/CD11b-	12	24.04			20.631	24.495		21.634	21.168	26.897				20.941		27.739	22.298	26.558	26.329	23.657			20.634	24.354		21.249	21.702	27.452				21.104		27.52	22.332	27.291	26.351	23.762			20.606	24.796		21.413	21.766	26.842
EML-D0 - Scal+/CD11b-	13	28.211			21.155	26.118	27.037	23.062	22.33					21.224		28.704	20.752	28.097		29.342			21.191	26.956	27.23	23.151	22.071					21.099			20.767	27.869		29.063			21.214	26.593	26.981	22.827	22.271
EML-D0 - Scal+/CD11b-	14	22.313			19.98	24.466	24.021	20.366	21.495			25.271		20.534		29.153	20.948	26.323	29.369	22.501			20.204	24.393	24.311	20.238	21.902			24.995		20.657		28.993	21.323	28.893		22.396			19.968	24.271	24.076	19.876	21.635			25.689
EML-D0 - Scal+/CD11b-	15	22.994	27.363		20.611	24.958	26.252	21.028	21.751	27.935		24.413		21.495		26.261	22.412	27.035	29.906	23.223	28.301		20.56	25.45	26.576	21.223	21.688	28.304		24.428		21.484		26.674	22.136	26.364		23.495	27.822		20.641	25.872		21.018	21.829	27.169		24.431
EML-D0 - Scal+/CD11b-	16	21.576	26.245		20.713	25.189	26.53	22.407	21.62	23.534	27.546	22.763		22.355		24.52	23.323			21.473	29.185		20.873	25.305	26.193	21.173	20.879	24.367	27.344	23.196		22.283		23.85	23.181	29.058		21.785	29.507		20.901	24.489	25.443	21.959	21.188	24.91	27.228	23.571
EML-D0 - Scal+/CD11b-	17	23.578			19.835	23.502		21.382	21.009			27.314		21.132		23.905	20.941	25.589		23.36			19.952	23.471		21.376	21.389			26.633		21.418		23.548	20.758	25.807		23.56			19.891	24.116		21.19	21.405			26.716
EML-D0 - Scal+/CD11b-	18	22.567	26.915		20.819	24.569		21.375	21.63			25.975		21.155		22.923	21.497	24.127		22.844	28.772		20.886	24.202		21.376	21.408			28.081		21.216		23.215	21.517	25.082		22.482	26.963		20.786	24.302		21.225	21.308			27.17
EML-D0 - Scal+/CD11b-	19	22.666	25.881		19.906	24.376		22.062	22.192			24.583		21.561		23.868	20.907	25.736	27.381	22.782	26.323		19.801	23.993		22.217	22.337			24.738		21.594		23.492	20.842	24.954	26.45	22.587	26.327		19.799	24.145		21.846	22.225			25.458
EML-D0 - Scal+/CD11b-	20	23.366		24.667	20.764	26.71	25.012	21.246	21.428			26.528		21.437		24.523	23.17	26.986	27.644	23.273		24.057	20.693	25.269	24.302	21.181	21.503			27.135		21.458		24.528	23.087	25.944	29.118	23.127		24.471	20.839	26.646	24.076	20.846	21.227			28.077
EML-D0 - Scal+/CD11b-	21	24.038			20.967	24.411		22.17	23.042					21.459		28.33	21.186	30.74		23.86			20.732	24.547		21.933	22.276					21.727			21.807	30.418		24.135			21.321	24.639		22.466	22.752
EML-D0 - Scal+/CD11b-	22	21.666	26.155		20.651	23.623		20.916	22.884			25.354		21.007	27.75		22.065	28.584		21.988	28.08		20.324	24.699	25.692	20.968	22.262			27.022		21.403	27.125	29.252	21.464	28.397		22.122	28.41		20.558	24.194	25.562	20.117	22.358			26.703
EML-D0 - Scal+/CD11b-	23	23.033	25.271		20.104	24.98		21.817	32.871			25.197		20.533		26.108	21.798	28.424	29.478	23.473	26.443		19.936	25.011		21.441	22.168	27.857		25.057		20.564		27.114	23.204	28.371	30.342	23.325	25.093		20.168	25.28		21.24	31.023	27.704		24.476
EML-D0 - Scal+/CD11b-	24	24.085			22.253	27.14		23.296	23.02					22.828		27.443	22.468	27.393	27.624	23.921			21.954	28.991		22.798	22.747					23.001		26.579	22.229	28.867		23.583			21.96	28.628		23.196	22.931
EML-D0 - Scal+/CD11b-	25	23.384			23.082	24.478		23.8	21.686					22.218		23.582	21.097	25.216		23.14			23.083	24.616		24.044	21.852					22.467		24.162	21.321	25.091		22.731			22.947	25.117		23.919	22.051
EML-D0 - Scal+/CD11b-	26	24.547			22.334	25.701		22.706	23.543					22.951		28.925	24.18		28.872	24.309			22.504	25.696		22.467	23.631					23.258		26.894	23.722	27.82	27.836	24.61			22.749	24.684		22.315	23.859
EML-D0 - Scal+/CD11b-	27	22.562			20.582	24.429		22.522	20.98	28.611				21.426		23.198	21.305	26.627	28.161	22.511			20.505	24.541		22.49	20.985	25.784				21.497		22.84	21.254	25.377	28.259	22.46			20.595	24.1		22.807	20.695	26.748
EML-D0 - Scal+/CD11b-	28	22.086			19.948	24.29	24.174	20.822	20.882			26.513		20.761		23.026	21.858	25.115	26.449	22.376			19.796	24.238	25.246	20.393	20.813			27.075		20.963		21.943	21.972	25.817	25.61	22.281			19.858	24.343	24.31	20.141	20.516			25.803
EML-D0 - Scal+/CD11b-	29	24.674	25.474		19.583	24.718		22.354	21.044	26.623	27.645	24.872		21.508	28.102	25.214	22.146	28.057		24.292	24.919		19.59	25.187		22.119	21.086	26.379		25.413		21.626	27.126	24.348	21.792	27.684		24.39	25.313		19.713	24.37		22.181	21.097	25.679		25.181
EML-D0 - Scal+/CD11b-	30	23.652	27.355		20.835	24.647		22.278	23.571	29.07				21.587		29.004	21.791	29.908		23.488	27.611		20.9	25.31		22.36	24.157					21.796			21.857	28.962		23.528	27.702		20.9	25.21		22.031	24.027
EML-D0 - Scal+/CD11b-	31	23.495			21.307	25.791		23.136	25.057			23.303		22.419			22.168			23.694			21.415	26.113		23.324	25.551			23.365		22.366			21.861			23.987			21.546	26.719		23.014	25.552			24.51
EML-D0 - Scal+/CD11b-	32	23.773			20.917	24.071		21.749	23.244	26.192				21.402		25.762	22.742	30.526		23.607			21.098	24.496		21.648	22.143	24.434				23.103		25.725	22.119	25.27		23.271			22.273	24.869		21.473	23.994	26.013
EML-D0 - Scal+/CD11b-	33	25.097	28.409		22.387	24.897		23.489	25.497	27.327				23.064		24	24.968	28.906	24.199	25.852	27.895		22.618	24.533		23.343	22.448	26.578				22.257		23.236	22.403	26.236	24.826	24.316	29.396		22.19	23.931		22.616	22.695	27.551
EML-D0 - Scal+/CD11b-	34	23.261			20.383	25.059		22.22	23.543					21.758		23.822	23.921	25.974		23.589			20.03	25.622		21.7	21.404					21.461		22.892	22.046	25.948	26.727	23.775			20.329	23.26		21.494	21.123
EML-D0 - Scal+/CD11b-	35	24.678			20.065	24.97		21.277	21.206					22.179		25.081	22.048	27.022	27.807	24.266			20.295	24.608		21.87	22.021					22.418		26.09	22.145	26.192	27.769	23.785			20.317	25.518		20.998	21.992
EML-D0 - Scal+/CD11b-	36	23.718			20.998	25.333	26.566	22.802	21.689					22.186		22.914	22.016	25.125	28.249	24.158			21.41	25.411	26.556	22.929	21.971					22.121		23.534	22.461	26.006	26.418	23.166			21.182	26.019	25.429	22.933	21.788
EML-D0 - Scal+/CD11b-	37	25.313			21.416	25.582		23.001	21.364	23.315		26.026		21.128		23.592	21.652	24.986	23.168	25.118			21.465	25.547		23.171	20.99	23.959		25.837		21.02		22.876	21.756	26.206	24.11	25.396			21.574	25.481		22.704	21.091	23.569		26.293
EML-D0 - Scal+/CD11b-	38	23.453			21.185	25.704	26.3	21.079	21.896				25.736	21.626		23.911	22.181	29.348	27.581	23.866			21.419	25.887	26.164	21.33	21.89	28.263			25.404	21.965		24.64	21.911	28.985	28.823	23.669			21.545	26.177	25.899	21.337	21.662	28.534			25.576
EML-D0 - Scal+/CD11b-	39	23.65	27.425		20.119	24.519	25.793	19.429	20.959			26.89		21.462		24.285	21.631	27.46		23.015	27.042		20.172	24.184	26.014	19.76						21.738		24.583	21.863	26.432		23.435	25.396		20.272	23.557	25.679	19.553	21.296	27.149		26.821
EML-D0 - Scal+/CD11b-	40	25.707	27.201		19.365	24.794		20.887	21.961			24.728		20.489		25.185	21.37	26.769		25.421	27.934		19.394	24.154		21.331	22.271			25.606		20.197		24.788	21.367	27.119		25.985	26.158		18.776	24.522		21.127	21.622			24.837
EML-D0 - Scal+/CD11b-	41	23.192			20.51	25.63	24.644	20.825	20.041					21.421		22.056	23.229	26.238		23.057			20.767	25.552	24.368	20.907	20.863					22.13		22.232	23.485	27.763		23.789			20.534	25.949	24.795	20.437	20.835
EML-D0 - Scal+/CD11b-	42	22.454			19.577	22.637		21.627		28.485				21.739			23.062	25.684	27.308	22.683			19.37	22.805		22.241	21.128	26.081				22.707			22.174	26.017	31.859	22.495			18.315	23.231			21.926
EML-D0 - Scal+/CD11b-	43	27.358			22.272	23.524		21.149	20.009				25.959	20.709			18.765	33.117	25.392	22.858			21.124	23.938		21.935					25.723	19.982			18.082	30.545	24.264	22.895			21.183	25.674		21.409					24.991
EML-D0 - Scal+/CD11b-	44	22.22			20.307	24.163		20.882	20.241					22.199		22.833	20.579	27.641	26.412	21.812			20.167	24.681		21.69	20.577	27.959				22.159		22.741	21.024	26.818	26.437	21.786			19.645	23.857		21.168	19.637
EML-D0 - Scal+/CD11b-	45	22.746			18.951	23.462		20.75	20.195					21.486		23.193	20.848	26.955		22.557			18.944	22.728		20.779	21.69					20.662		22.76	21.832	25.933		22.534			19.17	22.991		20.824	20.237
EML-D0 - Scal+/CD11b-	46	23.077			21.593	24.824	24.862	21.498	23.191					22.066		24.755	21.807	28.457		23.647			21.97	25.288	24.967	21.291	22.323					21.76		24.444	21.236	27.05		23.439			21.381	25.566	25.355	21.557	22.325
EML-D0 - Scal+/CD11b-	47	27.451			21.383	25.23	26.713	23.712	23.717			26.155		21.286			22.922		27.312	27.208			21.273	26.411	27.844	23.357	24.091			25.992		21.296			22.901	27.337	27.203	27.24			21.008	25.519	25.587	23.394	23.797			25.442
EML-D0 - Scal+/CD11b-	48	24.308			20.391	25.478		22.478	22.868			26.927		22.204			21.311			24.477			20.522	25.892		22.356	22.969			26.656		22.5			21.347	27.184	30.663	24.606			20.424	25.899		22.15	22.563			27.523
EML-D0 - Scal+/CD11b-	49	23.928		26.051	20.606	24.49		21.23	21.985					21.136			20.649	28.416	29.853	23.951		25.364	20.695	24.448		21.191	21.786					21.248		27.905	20.714	26.837		24.504		24.825	20.648	24.999		21.158	22.187
EML-D0 - Scal+/CD11b-	50	24.615	26.092	26.305	20.806	25.984		22.129	21.949					22.67		25.996	22.004			24.772	26.673	26.355	20.952	25.653		21.277	21.375					22.527		24.315	21.911	27.596		24.552	26.664	26.251	21.001	25.868		21.912	21.955
EML-D0 - Scal+/CD11b-	51	24.284			21.335	25.969	23.251	22.279	23.013					22.894		25.004	23.377	29.241		24.326			21.517	25.14	23.669	22.164	23.027					23.36		25.854	23.02	29.023		24.867			21.318	25.707	23.041	22.125	22.467
EML-D0 - Scal+/CD11b-	52	25.463	28.331		20.73	24.706		21.379	21.049			27.09		22.232		25.124	23.051	26.456		24.54	26.594		21.334	24.183		21.386	21.122			26.924		22.159		24.955	22.666	27.45		24.324	26.81		21.271	24.415		21.268	20.959			26.476
EML-D0 - Scal+/CD11b-	53	22.107		26.277	19.007	24.28		21.089				24.228		20.113		23.276	21.297	25.944		22.057		25.488	19.772	23.59		21.379	20.325			23.688		20.21		23.213	20.737	25.836		22.107		25.528	19.415	23.755		20.544	20.051			23.33
EML-D0 - Scal+/CD11b-	54				23.158	25.807		22.758				26.325		23.656	26.203		24.37	26.782		27.325			23.499	30.353		21.982	21.262			25.474				26.384	22.127	26.524		27.653			29.954	24.315		21.47	21.521			26.91
EML-D0 - Scal+/CD11b-	55				21.166			22.361					27.885	22.595			21.732		25.019	24.222			22.488	25.292		24.63						22.479			21.208		30.738	23.622			21.482	31.783		22.024
EML-D0 - Scal+/CD11b-	56		25.963		20.554	24.878	23.591		19.807					22.172		24.997	19.501	30.312	29.292	22.833	27.722		20.479	24.344	23.276							22.492		25.346	22.863	27.621	27.99	22.999	27.892		20.879	23.848	22.676		21.124
EML-D0 - Scal+/CD11b-	57	23.753	25.699		22.155	24.917	26.183	23.683	22.394					21.961	25.416	25.707	22.737	27.675		24.353	26.786		21.614	25.778	27.434	22.561	21.579					22.492	26.154	25.667	22.128	26.005		24.237	26.415		21.974	24.616	26.682	23.174	22.527
EML-D0 - Scal+/CD11b-	58	25.69	25.849		18.537	24.42		21.192	20.257	24.767				21.347		23.728	19.457	26.585	27.014	26.381	26.264		18.923	24.291		20.983	22.551	24.845				20.918		23.791	19.533	25.402	25.819	25.229	25.199		19.361	24.719		21.001	22.706	24.389
EML-D0 - Scal+/CD11b-	59	24.777			22.097	26.551		23.139	21.358	29.086				23.668		24.339	22.863	26.729	24.9	24.645			22.458	26.214		23.204	21.788	27.622				23.358		24.639	23.083	26.653	25.216	24.255			21.918	26.927		22.703	22.334	26.289
EML-D0 - Scal+/CD11b-	60	23.706			21.768	25.311		22.769	21.237					21.648		23.341	21.942	26.494	24.964	23.588			21.837	25.135		22.437	21.246					21.981		23.249	21.87	26.626	24.515	23.906			21.911	24.981		22.855	20.923
EML-D0 - Scal+/CD11b-	61	26.536			20.838	27.486		22.54	21.227					22.58		24.973	22.874	28.03		28.289			20.839	26.647		22.455	21.113					22.622		24.306	23.259	26.731		27.373			20.786	25.92		22.577	21.077
EML-D0 - Scal+/CD11b-	62			24.598	21.371	27.039	24.527	22.758	20.681					21.941		24.892	24.319	25.074	26.435			24.963	21.652	26.721	24.321	21.081	19.959					21.792			24.086	26.274	27.859			25.006	21.443		25.006	21.822	20.295
EML-D0 - Scal+/CD11b-	63	25.875				24.983		21.136	21.059	26.25				22.197		23.366	20.848	28.605	23.086	25.898			22.354	24.893		21.164	21.612	25.97				22.246		23.862	21.124	27.389	23.476	27.303	29.706		22.428	24.777		21.117	21.752	27.157
EML-D0 - Scal+/CD11b-	64	23.19			20.702	24.033	24.698	20.989	19.766	28.726				21.256		23.298	21.047	26.938		23.486			20.295	24.257	24.894	21.19	20.343	27.059				20.925		23.134	20.765	26.721		23.142			20.389	24.358	24.085	20.601	20.527	27.336
EML-D0 - Scal+/CD11b-	65	22.113			19.879	23.5		20.146	20.065					21.109		23.549	21.112	26.708	27.333	22.025			19.421	23.693		19.718	20.347	27.092				22.174		23.158	20.957	27.439	28.923	20.869			20.056	23.419		18.825	17.962	28.191
EML-D0 - Scal+/CD11b-	66	23.394			19.756	22.866		18.913	20.815	25.427		25.271		21.029		23.951	19.819	23.452	34.056	23.247			20.712	23.104		20.03	25.275	25.742		24.619		21.08		25.313	20.444	26.277	30.158	23.855			20.174	22.262		19.791	22.005	25.524		25.415
EML-D0 - Scal+/CD11b-	67	23.148			20.044	22.89	25.984	19.796	20.411					21.706		23.35	22.619	24.953		22.742			20.329	23.434	26.685	18.59	21.084		26.612			21.51		22.954	21.956	25.81		22.922			20.901	22.973	25.992	18.825	24.617		28.752
EML-D0 - Scal+/CD11b-	68	23.108			21.296	23.548	24.384	20.932	24.44					20.575		21.282	20.405	29.316	27.283	22.548			20.887	23.322	23.247	22.461						20.082			21.172			24.033			20.707	25.137		27.641	28.948
EML-D0 - Scal+/CD11b-	69	22.846	24.99	26.437	19.531	26.478	27.799	23.169	24.329	25.46		25.649		22.393		25.174	23.025	28.163		23.622	26.299	27.964	20.597	24.673	26.185	21.237	23.022	25.526		25.329		24.194		22.566	21.402	24.505		25.461	18.266	28.818	18.507			26.333	21.235			26.564
EML-D0 - Scal+/CD11b-	70	24.917	29.286	24.108	22.924	25.218	25.814	23.779	20.314			26.885		21.344		23.858	20.919	27.914		25.069	28.105		22.294	25.207	26.253	24.932	24.583			26.872		20.767		26.477	23.375	28.165	28.162	23.275	27.485	23.115	22.423	25.751	27.042	24.953				26.802
EML-D0 - Scal+/CD11b-	71	22.983			20.631	25.134	26.021	24.437	21.733					22.694		24.294	22.139	27.352	27.539	23.507			21.456	25.684	25.791	23.705	21.75					22.504		23.952	22.221	26.952	26.903	23.236			21.338	25.547	26.306	23.544	21.744
EML-D0 - Scal+/CD11b-	72	23.707		26.767	19.953	25.048		22.136	21.08	28.242		25.626		21.846		22.827	22.319	27.441		23.925		26.201	20.06	24.541		22.66	19.815	27.265		25.732		21.191		22.757	22.379	27.734		24.15		25.384	20.1	24.572		22.268	21.517	26.731		25.784
GM-CSF/IL-3 - α (Sca1+/CD11b-)	73	21.437	24.486		23.65	24.884	23.082	21.176	23.307		25.428	24.702	26.357	21.597	23.933	25.508	21.22	26.069	25.575	21.418	24.694		23.601	25.02	23.478	20.956	23.47		25.076	25.139	25.399	21.813	23.235	25.603	21.355	25.574	25.573	21.459	24.92		23.573	25.223	23.838	21.083	23.104		25.182	24.624	25.739
GM-CSF/IL-3 - α (Sca1+/CD11b-)	74				24.2	26.731		24.548	23.1					24.406		25.705	23.023						24.606	26.071		24.616	23.658					24.17		26.99	22.715						24.67	26.989		23.981	24.073
GM-CSF/IL-3 - α (Sca1+/CD11b-)	75	25.452	24.665		25.297			25.115	25.317					25.559		26.022	23.286			26.556	25.094		24.957			25.157	25.77					25.63		25.957	23.411			26.386	24.917		24.809			24.625	25.884
GM-CSF/IL-3 - α (Sca1+/CD11b-)	76	24.201			24.918	24.881	25.963	22.473	23.685					24.933		28.329	24.873	26.741		24.605			25.582	25.609	26.514	22.087	23.57					24.718		27.415	24.248			23.839			26.238	24.747	24.722	22.623	23.826
GM-CSF/IL-3 - α (Sca1+/CD11b-)	77	27.511	25.145		23.976	26.818	26.553	21.977	24.186	25.902		26.487		24.645		24.384	23.606	25.724		26.364	25.62		22.443	25.489	24.3	23.559	24.447	26.172		25.561		23.74		25.659	25.109	24.906		26.409	25.522		23.254	26.338	25.716	22.699	23.716	25.919		24.866
GM-CSF/IL-3 - α (Sca1+/CD11b-)	78	25.456	26.446		26.016		26.534	24.427	26.836					23.876		25.992	22.053			25.184	28.132		26.867		24.368	23.719	24.662	26.266				24.545		23.431	21.833			26.296	27.431		26.063		23.837	24.663	29.541	27.303
GM-CSF/IL-3 - α (Sca1+/CD11b-)	79	26.633			25.651			25.084	25.407	27.187				25.056		25.411	22.251			27.643	28.333		25.16		25.981	24.347	26.198	27.275				24.643		25.528	21.975			25.53	27.209		25.057		25.141	25.526	25.728	27.238
GM-CSF/IL-3 - α (Sca1+/CD11b-)	80	25.643			22.812	28.07		22.505	20.777	26.611				26.357		24.418	24.633	28.257		26.123			23.723	26.705		22.484	21.276	27.656				25.141		22.19	23.452	27.774	26.15	26.68			23.582	25.08		23.348	22.259	26.546
GM-CSF/IL-3 - α (Sca1+/CD11b-)	81	25.614			25.697		23.72	24.114	25.175					25.183		25.968	26.49	27.994	29.452	24.678			26.101		23.567	24.543	26.652					24.559		27.19	26.223	28.585	28.504	25.572			26.636		24.221	25.259	25.451
GM-CSF/IL-3 - α (Sca1+/CD11b-)	82	24.426			22.544	25.878		22.969	22.968			24.745		23.248		23.968	23.264	27.35		23.864			22.264	25.38		22.934	22.95			25.451		23.361		24.617	23.202	27.097	26.095	25.161			22.442	26.125		23.235	22.764			25.372
GM-CSF/IL-3 - α (Sca1+/CD11b-)	83	23.655			21.694	26.954	26.533	21.25	23.7					23.122		24.081	21.272	28.114		23.179			21.961	26.44	26.06	21.664	23.337					22.934		24.003	21.2	28.972		23.386			21.633	25.836	27.461	21.302	23.177
GM-CSF/IL-3 - α (Sca1+/CD11b-)	84	24.407			23.699	26.806		24.716	25.223					24.635	27.367	24.813	23.141	30.211		24.713			23.76	26.53		23.567	23.89					24.948	26.245	24.635	22.76	29.077		24.513			23.681	26.334		23.982	24.641
GM-CSF/IL-3 - α (Sca1+/CD11b-)	85	23.695	25.483		21.166	25.321	25.573	21.388	21.649			26.092		23.552	22.856	24.38	21.293	26.803	28.049	23.26	25.107		21.058	25.131	25.412	21.346	22.124			26.438		23.93	22.791	23.729	21.455	26.225	28.39	23.927	25.363		20.951	24.897	25.081	20.963	22.127			26.468
GM-CSF/IL-3 - α (Sca1+/CD11b-)	86	23.992			22.725	25.927	25.99	21.885	24.907			26.817		23.186		24.998	22.715			23.561			22.448	26.438	26.068	21.54	24.86			26.591		22.528		24.686	22.146			23.992			22.582	27.922	26.206	21.216	23.655			28.455
GM-CSF/IL-3 - α (Sca1+/CD11b-)	87	27.862			25.492		26.479	24.72	23.484					26.557		25.501	24.735			28.913			25.535		26.607	24.921	25.297					25.242		26.601	25.331			27.554			24.445		27.209	25.116	24.832
GM-CSF/IL-3 - α (Sca1+/CD11b-)	88	24.815			23.718	36.63		23.371						25.769		26.511				25.231			23.772	25.696		22.917	24.26					24.112			23.119			24.469			23.399	26.084		22.421
GM-CSF/IL-3 - α (Sca1+/CD11b-)	89	27.138			27.881			32.327	31.132						31.918	32.447	24.627			27.228		33.354	28.648			22.857	23.677						29.792	24.63	24.121	29.21		28.481		31.253	29.691			23.689	27.486
GM-CSF/IL-3 - α (Sca1+/CD11b-)	90	26.885		32.236	25.9	27.752	31.943	26.368	24.198	29.458	32.949	31.553	32.987	27.026	32.434	30.437	28.726			27.375	28.926	33.54	21.931	30.471	30.067					31.347		33.6	31.804	29.206					29.462		22.116	25.056	29.305	26.088	24.025		34.363	31.228	32.066
GM-CSF/IL-3 - α (Sca1+/CD11b-)	91	25.376				26.337	25.677		24.284					27.333		28.095	22.644		29.124	24.999				25.532	25.049		24.944					28.692		26.369	23.471		27.399	24.902				27.048	24.894		25.097
GM-CSF/IL-3 - α (Sca1+/CD11b-)	92	24.234			24.043			22.682	23.186			25.888		23.867		24.719	21.697	28.18		22.965			23.89			22.007	22.682			25.747		24.723		24.276	22.296	26.529		23.937			23.269		28.14	22.854	22.195			28.569
GM-CSF/IL-3 - α (Sca1+/CD11b-)	93	25.507	27.386		21.314	26.47	24.581	23.123	23.256			26.118		23.759		22.73	22.371	25.878		24.713	26.919		21.201	24.83	25.039	22.374	22.36			25.739		23.605		22.277	21.896	26.006		25.383	28.18		21.453	25.124	24.36	22.606	22.668			26.126
GM-CSF/IL-3 - α (Sca1+/CD11b-)	94	25.241	26.461		27.339	28.369	27.947	24.047	25.644								26.962		27.858	25.124	26.029		28.346	29.058	26.091	23.673	26.442								26.693		27.067	25.358	26.467		29.187	29.546	26.246	24.319	26.135
GM-CSF/IL-3 - α (Sca1+/CD11b-)	95	27.106	27.521		23.341	26.615	26.45	25.967	22.275					24.432		26.052	23.579	28.471		28.977			23.76	26.075	26.635	26.037	22.732					24.432		25.771	23.678	28.916		27.309	27.754		23.015	26.501	26.105	27.224	22.7
GM-CSF/IL-3 - α (Sca1+/CD11b-)	96	25.466	22.238		22.764	26.841	25.964	24.854	23.243	26.562			25.651	23.845		23.182	22.901		25.271	26.055	22.089		22.745	27.222	25.254	25.027	22.406	25.262				24.264		21.949	22.098		24.618	26.687	22.233		22.276	27.5	25.906	25.091	22.005	24.531			26.978
GM-CSF/IL-3 - α (Sca1+/CD11b-)	97	23.751			22.111	23.844	25.138	21.957	23.061					23.769	25.014	26.657	22.096	25.663	27.19	23.66			22.397	24.111	25.649	21.733	23.114					23.634	24.942	26.228	21.956	25.852	26.387	23.84			22.113	24.165	25.4	21.981	23.39
GM-CSF/IL-3 - α (Sca1+/CD11b-)	98	22.794			25.529	26.749	25.7	23.725	23.286			24.599	28.001	28.956	24.514		26.932			22.772			25.621	26.841	25.091	23.765	23.432			24.389		28.675	24.453		25.247			22.98			25.344	26.413	25.872	24.509	23.44			24.493
GM-CSF/IL-3 - α (Sca1+/CD11b-)	99	22.8			23.122	24.436	24.996	21.501	21.668					23.445		22.867	19.21	28.03		22.893			22.936	24.786	25.066	21.316	22.269					23.365		23.175	19.219	27.364	27.948	22.907			23.106	25.686	24.581	21.608	22.286
GM-CSF/IL-3 - α (Sca1+/CD11b-)	100	26.359			29.048	26.303	25.436	24.282	23.78					24.764		24.905	23.433			27.433			29.066	27.158	24.881	24.218	24.087					25.851		27.158	23.653			26.469				26.548	25.473	24.968	23.535
GM-CSF/IL-3 - α (Sca1+/CD11b-)	101	26.736				27.463		25.377				26.135					25.779			28.691				26.695		25.89	28.187			26.385					25.846			28.13				26.623		27.129	27.922			27.139
GM-CSF/IL-3 - α (Sca1+/CD11b-)	102	22.729	24.459		20.973	24.746	26.007	20.977	22.029	26.016				21.807		25.585	21.215	27.526		22.794	24.5		20.87	24.976	25.769	20.862	22.083	26.021				21.778		24.741	21.092	28.092	29.967	22.989	24.629		20.845	25.28	24.672	21.471	22.134	26.206
GM-CSF/IL-3 - α (Sca1+/CD11b-)	103	25.827			24.363				23.673					27.209		25.385	25.626	28.046	26.139	26.227			24.674				24.157					27.33		28.694	25.132		26.744	26.279			24.631			30.315	24.64
GM-CSF/IL-3 - α (Sca1+/CD11b-)	104	26.68			25.134			26.441	24.056					26.832		25.966	24.834		27.243	27.436			26.163			29.165	23.916					26.461		25.835	25.204		27.426	26.47			26.301			29.471	23.806
GM-CSF/IL-3 - α (Sca1+/CD11b-)	105				25.17		27.772	23.993	22.474					25.595		24.824	21.884						25.251		27.095	24.188	22.589					25.006		24.098	21.886						24.99		25.913	24.603	22.625
GM-CSF/IL-3 - α (Sca1+/CD11b-)	106	27.055					23.96	24.066	24.868					25.655		23.577	22.819			25.666			28.21		23.809	24.629	24.97					26.28		24.006	23.156	28.957		26.54					23.812	26.123	24.649
GM-CSF/IL-3 - α (Sca1+/CD11b-)	107		27.27		29.573							25.866		26.803	26.445						27.379									26.508		28.456	26.724						27.42					29.513				26.625
GM-CSF/IL-3 - α (Sca1+/CD11b-)	108	25.115	23.433		24.068	27.77			22.841					23.464		22.512	23.379	29.091	23.958	27.21	23.338		24.471	27.409			22.755					23.179		22.454	23.571	27.414	24.194	26.492	23.563		24.258	27.122			22.757
GM-CSF/IL-3 - α (Sca1+/CD11b-)	109	24.038			22.754	24.736	23.671	21.21	23.255					22.839		22.921	20.251	26.025	24.253	23.977			22.702	25.371	24.312	21.196	23.169					22.667		22.775	20.071	25.916	24.025	24.115			22.717	25.049	24.123	21.626	23.126
GM-CSF/IL-3 - α (Sca1+/CD11b-)	110	22.35	27.184		21.99	25.049		20.704	22.764			26.703		22.575	25.492	23.237	21.056			22.403	26.784		21.863	24.307		20.97	22.943			27.04		22.732	26.327	23.293	20.869			22.134	26.339		22.162	24.945		21.201	22.733			26.891
GM-CSF/IL-3 - α (Sca1+/CD11b-)	111	22.562	26.759		21.652	23.225	25.779	21.569	21.597					22.101		23.213	21.1	26.196	27.258	22.789	27.679		21.834	23.672	26.419	21.256	22.153					22.164		22.989	21.1	25.759	25.29	22.45	27.6		21.572	23.856	24.811	22.389	21.831
GM-CSF/IL-3 - α (Sca1+/CD11b-)	112	25.004				27.041		23.285	24.503					26.407		25.249	23.394	29.157	26.672	25.553			29.012	26.861		23.22	25.435					26.376		24.857	22.553	28.885	26.539	25.111				26.066		23.698	25.027
GM-CSF/IL-3 - α (Sca1+/CD11b-)	113	22.645		25.347	22.298	24.637	24.622	20.563	22.49	27.081				24.248		23.523	21.892	26.246	25.696	22.646		25.19	22.359	24.82	24.756	20.721	22.774	26.524				24.653		23.738	22.128	27.538	26.178	22.503		25.392	22.65	24.339	24.35	20.855	23.284	26.39
GM-CSF/IL-3 - α (Sca1+/CD11b-)	114	25.863	26.755		26.817	27.809	25.55	25.253						26.484		25.696	26.056	29.112		25.89	26.227		26.663		25.159	26.371	28.322					26.257		26.547	26.166	28.011		25.093	27.432		26.771	27.241	24.955	26.87	28.125
GM-CSF/IL-3 - α (Sca1+/CD11b-)	115	24.975					26.017	24.062	23.853			25.414		25.59		24.542	24.998			25.756			28.905		26.578	24.213	25.009			25.673		26.741		24.848	24.845			26.009					26.698	25.804	24.554			25.358
GM-CSF/IL-3 - α (Sca1+/CD11b-)	116				23.897			23.527	22.271					24.538		23.328	20.646		23.464	26.077			23.796				21.47					24.618			20.569	29.203	24.405	27.317			24.227			23.813	22.185
GM-CSF/IL-3 - α (Sca1+/CD11b-)	117	26.876			24.714	26.069	25.06	24.194	24.576					26.124		24.845	24.024			26.128			23.797	26.027	26.318	24.068	24.996					28.41		24.689	24.207	29.931		26.317			24.906	27.739	25.386	23.556	23.572
GM-CSF/IL-3 - α (Sca1+/CD11b-)	118	26.999	29.317		26.818	27.514		25.373	24.88					25.035		25.005	24.72			28.811			28.217	27.836		25.428	24.73					25.599		25.109	24.328			27.309			26.362	26.605		24.959	24.587
GM-CSF/IL-3 - α (Sca1+/CD11b-)	119	26.756					28.221	26.085	26.96							27.602	24.131			26.58			27.98		27.551	26.048	28.247							27.325	24.445			26.789			28.899		27.426	25.461	27.867
GM-CSF/IL-3 - α (Sca1+/CD11b-)	120	24.73	28.807		25.134			25.063	24.258					25.974		24.142	23.4		27.149	24.9			24.888			24.982	24.231					26.165		23.968	23.777	27.422	27.256	25.14	29.004		25.468			26.587	24.122
GM-CSF/IL-3 - β (Sca1+/CD11b+)	121	20.704	26.376		23.826	24.026	22.677	22.001	25.961			23.035	26.243	22.761	24.829	24.187	24.256	26.096	26.233	21.439	23.96		22.935	23.007	22.57	20.502	23.821			23.071	25.354	22.805	25.748	25.134	22.424	24.894	25.719	21.045	24.735		23.313	23.688	21.114	21.508	24.029			24.196
GM-CSF/IL-3 - β (Sca1+/CD11b+)	122	21.99	26.677			25.227	20.399	21.771	24.234					25.138	25.444	25.348	26.153	26.221	24.833	21.669	27.57		27.34	26.008	21.09	21.699	24.605					25.212	26.349	25.041	25.063	27.687	24.893	22.137	28.013			25.386	21.997	22.349	24.788
GM-CSF/IL-3 - β (Sca1+/CD11b+)	123	21.906			25.262	26.592	20.941	23.378	24.997							28.458	24.241	28.784		21.774			25.287	27.063	22.555	23.52									23.543			22.952			25.824	27.678	21.751	23.747	24.419
GM-CSF/IL-3 - β (Sca1+/CD11b+)	124	23.555			25.562	25.496	21.092	21.422	36.998			25.293		25.791	35.927	31.264	22.803	26.448		23.556		18.374	27.276	25.374	18.095	23.63	24.297			26.941			16.971		23.016	26.291		22.647			27.549		22.202	22.366	24.586			23.26
GM-CSF/IL-3 - β (Sca1+/CD11b+)	125	23.603			23.355		24.1	21.527	23.122					23.13			22.849	29.75		22.96	27.078		24.211		23.762	19.26	22.964					22.984			22.396	30.233		22.629			24.45		24.465	19.618	21.362
GM-CSF/IL-3 - β (Sca1+/CD11b+)	126	21.609	25.633		23.741	27.45	22.761	21.65	24.415			24.673		21.044	25.36	26.244	23.727			25.545	25.009		24.143	28.164	22.275	22.013	24.699			23.56		22.482	25.413	26.353	22.794	31.256		21.669	24.932		24.532		22.854	21.654	23.914			24.234
GM-CSF/IL-3 - β (Sca1+/CD11b+)	127	25.452			23.328	24.746	26.193	24.464	22.9					23.993		25.482	24.589	26.311	25.143	24.679			23.729	24.591	24.931	24.121	24.062					25.141		25.808	25.588	29.145	26.113	25.69			23.582	25.566	25.495	23.69	23.527
GM-CSF/IL-3 - β (Sca1+/CD11b+)	128	24.288			27.203	26.495	24.179	23.491	24.725							28.496	28.022			23.962			26.301	25.334	23.884	23.195	25.476									28.746		23.014			26.06	26.116	24.63	23.409	24.163
GM-CSF/IL-3 - β (Sca1+/CD11b+)	129	27.119				26.866	27.274		26.572			26.972		25.086		26.822				26.398				26.801	25.299		28.108			26.641		24.703		26.389				27.338				26.674	24.627		27.878			27.948
GM-CSF/IL-3 - β (Sca1+/CD11b+)	130	26.323			24.82	26.191	23.154	24.934	24.315					24.835	28.384		25.896	27.964	29.385	27.01			25.426	26.56	22.912	24.125	24.328					25.205	28.773		24.826		28.997	26.174			25.45	25.535	22.56	19.138	25.132
GM-CSF/IL-3 - β (Sca1+/CD11b+)	131	18.867			23.957	23.691	21.626	19.886	15.697		26.918	22.27		26.973	25.311	28.673	22.863	24.742	29.741	18.055			23.797	23.81	22.415	19.108	23.74			22.715		26.217	25.653	28.793	22.43	24.975	28.741	18.345			22.859	23.486	21.045	19.996	23.299			23.697
GM-CSF/IL-3 - β (Sca1+/CD11b+)	132	17.218			23.591	22.014	22.244	19.288				27.722		25.623	24.124			25.874	28.456	19.149			23.825	22.874	22.81	19.859	23.186		26.032	27.582		26.269	24.745	28.508	23.473	25.743	27.456	18.907			22.785	22.236	21.485	23.395	23.514
GM-CSF/IL-3 - β (Sca1+/CD11b+)	133	23.113			23.463	23.351	21.109	21.643	23.398			24.205		24.952	25.875	24.81	22.793	26.263	26.976	23.381			23.324	22.634	21.174	22.303	23.559			24.069		24.089	25.147	24.274	23.29	25.658	25.976	23.824			23.132	24.868	21.141	21.221	22.698			24.497
GM-CSF/IL-3 - β (Sca1+/CD11b+)	134		27.033		24.393			24.953	24.473					25.056		27.28	23.451				27.472		25.011			26.436	24.635					24.705		28.228	23.382				27.524		24.528			25.05	25.231
GM-CSF/IL-3 - β (Sca1+/CD11b+)	135	22.215			25.648	25.227	21.409	21.207	22.817	25.806				23.381	25.143	26.749	22.717	26.395	27.734	22.19			27.199	24.435	21.439	21.781	23.148	24.836				23.398	24.641	27.003	22.307	26.673	28.204	22.403			26.272	25.048	21.706	21.382	22.654	25.378
GM-CSF/IL-3 - β (Sca1+/CD11b+)	136	23.411	28.649		26.609	25.925	23.244	24.294	24.258	26.46	26.354			28.385	26.53		24.253	27.881		24.085			26.097	26.126	23.292	22.757	23.673	27.853				28.548	26.253		23.781			23.881			26.107	25.407	22.627	23.967	24.482		27.047
GM-CSF/IL-3 - β (Sca1+/CD11b+)	137	24.197			25.309		24.257	23.845	25.619					27.11		27.375	24.264		27.778	24.513			26.251		23.936	23.496	25.663					27.001		27.13	25.222		27.525	24.249			25.427		24.114	23.436	25.952
GM-CSF/IL-3 - β (Sca1+/CD11b+)	138	25.581			24.853	27.137	22.278	26.943						27.965			26.497	29.114		25.113			24.636	26.62	22.033	27.103	29.506					28.48			27.142	29.347		24.913			24.907	27.287	22.43	28.001	30.325
GM-CSF/IL-3 - β (Sca1+/CD11b+)	139	26.034					22.855	24.482	25.868				26.357	29.218			25.253			26.976	29.367				22.518	24.447	26.328				25.758	27.964			25.277			25.156	29.014		28.03		22.787	24.472	27.242
GM-CSF/IL-3 - β (Sca1+/CD11b+)	140	24.105			25.197	26.829			24.018					25.044	26.089		22.375	27.655		24.955			25.445	28.437		28.965	24.579				28.14	26.158	26.033	28.537	22.218	27.904		24.944			26.424	27.015			24.765
GM-CSF/IL-3 - β (Sca1+/CD11b+)	141	27.302			23.68	25.977		23.193	23.097					22.897		26.801	25.395	26.653	28.015	28.961			23.771	25.594		22.798	23.121					22.703		26.804	25.86	27.703	29.132	27.586	29.064		23.896	25.939		23.226	22.808
GM-CSF/IL-3 - β (Sca1+/CD11b+)	142	24.182			25.32		22.463	23.774	24.395				27.586	24.452	26.54	27.522	23.876	25.659	25.509	23.87	27.116		26.851	24.152	22.588	22.796	22.714					24.332	25.734	26.722	23.708	25.714	25.789	23.919	27.161		25.874	24.318	22.462	22.575	19.084				27.779
GM-CSF/IL-3 - β (Sca1+/CD11b+)	143	19.227			23.527	23.591	19.607	18.604	22.299	27.952	25.872	23.729		25.198	22.404	25.616	22.678	25.83	26.498	17.988			23.987	23.247	19.895	18.404	22.173	24.516	25.926	23.598		25.84	21.466	26.978	22.124	25.456	26.752	19.9			23.338	23.64	19.057	18.931	22.014			23.906
GM-CSF/IL-3 - β (Sca1+/CD11b+)	144	19.099			24.842	24.3	19.69	19.961	23.34			23.362		27.084	23.522	27.919	22.675	26.389	25.568	19.326			24.138	24.381	18.293	19.94	23.725			23.211		26.173	23.847	26.581	23.683	26.147	25.986	18.587			24.779	24.056	19.543	19.286	23.49
GM-CSF/IL-3 - β (Sca1+/CD11b+)	145	23.282	27.243			26.877		24.107	24.524					26.29		25.188	23.693		26.664	23.47				26.242		24.158	24.723					25.21		25.43	23.335		26.797	23.641	27.125			26.142		25.304	24.501
GM-CSF/IL-3 - β (Sca1+/CD11b+)	146	22.533			24.273	25.163	20.766	21.164	24.591					24.788		27.373	25.346	27.729	26.151	22.783			23.589	24.67	20.467	21.172	24.811					24.955		27.255	26.194	27.813	26.678	22.738			23.773	24.746	20.835	21.724	24.931
GM-CSF/IL-3 - β (Sca1+/CD11b+)	147	23.886			25.254	27.012	23.771	26.663	24.188			24.765		23.31		29.097	24.276	28.048		23.319			26.41	26.987	23.385	25.909	24.971			24.814		23.505		26.176	23.953	27.834		23.496			25.405	26.419	23.84	25.669	24.95			25.258
GM-CSF/IL-3 - β (Sca1+/CD11b+)	148	21.452	24.867		22.319	24.55	22.935	20.398	23.724	25.803		26.364		22.678		24.388	21.911	26.17	25.745	21.893	25.164		22.69	25.407	22.809	20.135	23.697	25.323		26.426		22.848		24.228	21.346	26.413	25.346	21.516	24.395		22.145	24.047	23.045	20.068	23.268	26.839		26.792
GM-CSF/IL-3 - β (Sca1+/CD11b+)	149	21.987	24.557		26.061	24.718	21.937	21.929	23.539		27.262	27.052		27.108	24.619	26.924	24.818	28.889	27.847	22.124	25.092		25.702	24.971	21.903	21.645	23.819			26.473		27.65	26.026	25.952	24.08	27.487	28.354	22.142	23.874		25.803	24.323	21.761	21.979	23.047			27.553
GM-CSF/IL-3 - β (Sca1+/CD11b+)	150	22.34	25.418		22.207	26.444	22.527	22.686	22.516					23.56	25.38	23.807	24.522	25.661	28.132	22.23	25.856		22.304	25.915	22.5	22.371	22.664					23.082	25.069	23.761	24.078	25.587	28.061	22.264	27.003		22.364	26.519	21.9	23.377	22.358
GM-CSF/IL-3 - β (Sca1+/CD11b+)	151	23.264			26.374	24.134	25.746	21.332	23.43					25.287	25.735	24.759	23.767	28.987		23.585			25.254	24.366	25.646	21.341	23.744					25.579	26.12	24.202	24.712	28.947		23.054	29.264		26.33	24.095	25.545	22.904	23.724
GM-CSF/IL-3 - β (Sca1+/CD11b+)	152		24.865		24.485	25.451	23.791	21.631	23.191		25.655	26.309			24.255	25.349	26.134			21.72	25.297		25.021	25.319	24.133		21.816		25.416	26.177		27.25	25.26		24.179	26.286		22.076	25.581		24.915		23.516	20.887	22.643			26.836
GM-CSF/IL-3 - β (Sca1+/CD11b+)	153	22.377	24.946		21.737	23.256	23.673	20.097	22.245	27.052		24.622		21.985		24.019	21.585	26.517	26.285	22.084	24.77		22.232	23.398	24.27	20.013	22.302	26.858	26.806	25.467		22.636		24.193	21.4	25.575	26.586	22.239	25.073		22.322	24.026	22.954	20.529	21.225	26.658		26.247
GM-CSF/IL-3 - β (Sca1+/CD11b+)	154	25.871	29.145		28.944	26.639	23.245	23.808	23.966								25.774			25.489	29.244			29.109	23.054	24.009	24.182			28.808		29.076			25.256			25.117	29.644		27.967	28.292	22.996	24.314	24.276
GM-CSF/IL-3 - β (Sca1+/CD11b+)	155	24.369			25.194	25.756	22.178	24.492	23.42			27.721		23.927			25.208		26.822	24.088			25.134	25.997	21.449	24.43	23.84			27.23		24.571			24.175		27.341	23.613			25.66	25.286	22.028	23.825	22.68			27.121
GM-CSF/IL-3 - β (Sca1+/CD11b+)	156	26.034			25.377		23.979	21.889	24.44			26.595		23.338			24.081	27.86		25.085			24.35	27.67	24.999	21.853	25.365			26.431		23.36			25.797		28.967	24.768			24.572	27.422	24.515	23.194	26.218			25.833
GM-CSF/IL-3 - β (Sca1+/CD11b+)	157	21.305	23.771		22.009	23.736	22.811	19.961	21.757		25.327	28.363		22.431	24.207	23.508	22.445	25.26	22.462	21.697	24.524		21.185	22.882	22.727	19.698	22.802		25.227	26.678		20.492	25.416	23.732	22.307	24	22.626	20.882	23.49		20.849	23.316	22.83	20.383	19.721		25.988	27.415
GM-CSF/IL-3 - β (Sca1+/CD11b+)	158	23.134	27.076		25.675	25.104	21.496	24.062	23.347		30.902			27.529		24.109	23.025	26.955	26.003	22.471	27.035		25.221	26.208	21.689	24.113	24.138					26.574		23.805	23.957	28.736	25.977	22.606	26.83		25.858	24.552	19.684	25.94	24.916				28.335
GM-CSF/IL-3 - β (Sca1+/CD11b+)	159	21.219	25.564		24.421	23.336	21.49	22.242	24.24		26.947	26.84		22.622	24.691	26.439	23.297	26.339		21.376	25.398		24.596	23.695	21.445	22.37	25.011			28.124		23.101	25.449	27.507	23.43	25.789		21.614	26.028		24.805	23.322	21.017	23.413	24.406		26.215	27.786
GM-CSF/IL-3 - β (Sca1+/CD11b+)	160	21.978	25.369		26.211	25.539	22.762	21.437	23.517					22.89	26.263	27.291	22.856	25.935		22.08	25.867		25.532	24.703	22.635	21.836	23.822		28.037			22.547	25.194	26.307	24.138	25.771	29.487	21.893	25.48		26.879	25.144	23.54	22.48	24.573
GM-CSF/IL-3 - β (Sca1+/CD11b+)	161	23.331	26.008		24.421		20.677	23.485	23.726			25.539		24.684	26.808		24.378	27.052		22.79	25.249		24.346		20.949	23.166	23.317			25.565		24.516	26.695	28.272	23.99	28.531		22.632	26.001		24.594		20.521	23.387	22.854	27.668		26.032
GM-CSF/IL-3 - β (Sca1+/CD11b+)	162	22.024	24.969		23.598	24.1	25.016	23.094	22.542		27.483	24.259		24.508	25.513	24.639	22.447	27.835		22.459	26.386		23.145	24.348	24.516	22.85	22.201			24.984		24.361	25.18	24.508	22.376	29.753		22.272	25.005		24.074	24.391	24.405	24.761	22.284		27.969	24.252	27.775
GM-CSF/IL-3 - β (Sca1+/CD11b+)	163	25.035			27.618	27.791	26.107	23.378	24.544					25.354		23.96	25.358	28.848	27.243	24.455			26.595	28.342	26.676	23.107	24.939					25.509		23.8	24.888		27.318	25.524			26.342	26.637	26.188	23.794	24.803
GM-CSF/IL-3 - β (Sca1+/CD11b+)	164	21.05	25.6		21.798	22.269	19.83	20.537	22.104	26.291	27.025	28.495		23.814	24.512	25.42	22.868	25.892	25.298	20.84	24.851		22.218	23.566	20.005	20.077	21.656	27.245	27.158	27.218		23.916	24.175	24.893	22.755	25.464	25.052	20.805	24.61		22.49	23.172	19.706	20.054	21.654	25.184	27.146	27.465
GM-CSF/IL-3 - β (Sca1+/CD11b+)	165	20.153	25.836		24.876	25.256	18.268	21.207	23.843			27.251		23.092	26.389	27.378	22.493	24.83	26.02	20.315	26.411		24.51	25.981	18.267	20.388	24.539			27.057		23.52	25.618	27.601	23.148	24.943	26.23	19.959	25.167		25.044	24.248	19.139	20.724	24.268			28.549
GM-CSF/IL-3 - β (Sca1+/CD11b+)	166	22.825			25.353	29.347	21.216	20.821	24.466							26.061	24.203	27.453	26.329	23.226			25.342	28.051	21.588	21.001	24.886							26.774	25.185	27.103	26.551	23.307			25.725	28.552	21.575	20.941	24.114
GM-CSF/IL-3 - β (Sca1+/CD11b+)	167	27.061	29.594		27.66	25.741	22.505	23.348	26.015						28.885		27.906			27.083		31.641	29.627	29.738	21.86	28.002	28.589				29.618		28.45		28.914	29.643		28.782	30.661	31.429	28.016	27.185	36.73	25.064	31.791
GM-CSF/IL-3 - β (Sca1+/CD11b+)	168	25.806			24.294	26.758	25.286	23.46	23.814					25.046	26.358	24.341	26.243			26.52	24.641		23.479	28.305	25.141	24.719	22.744				27.488	24.7	25.178	24.886	24.511		29.889	23.637	26.436		22.719	26.81	24.479	24.623	23.251			27.428
GM-CSF/IL-3 - γ (Sca1-/CD11b-)	169		23.361		23.997	28.037		22.851	22.644	24.676			26.823	22.6		24.718	24.059		24.527		23.488		23.261	27.213		23.398	23.12	25.872			26.309	22.408		24.415	23.533		25.065		23.645		23.803	27.654		22.459	22.864	25.134			26.344
GM-CSF/IL-3 - γ (Sca1-/CD11b-)	170	24.9				25.052		24.57	21.335	23.844				24.16		22.004	22.536	26.723	22.421	24.841	19.04		23.504	24.445		23.732	21.146	23.334			24.254	24.062		20.866	21.728	25.92	22.232	24.339	20.198		23.538	23.026		24.021	21.079	23.499			24.152
GM-CSF/IL-3 - γ (Sca1-/CD11b-)	171	26.145	22.152		24.084	28.92		24.752	21.456	26.298			26.112	23.753		23.745	24.237	27.894	26.616	26.745	22.571		23.175	29.274		26.354	21.36	26.321			26.478	21.976		23.044	23.416		25.711	26.829	23.101		23.992	26.831		25.424	22.919	26.299			29.709
GM-CSF/IL-3 - γ (Sca1-/CD11b-)	172	25.985	20.966		23.646	25.576	25.071	24.733	23.554	25.657				18.821	23.193	25.439	22.613				22.667			26.356		24.64	21.16	25.984		27.656	18.385		28.144		20.691	26.478	23.187	26.777	23.425		25.395	25.973		26.661	28.957	24.302			20.057
GM-CSF/IL-3 - γ (Sca1-/CD11b-)	173	27.86				23.033	22.802	19.058	25.012	23.942	21.533										25.107				22.249	25.548	22.195		23.278			23.239	21.892	26.521	22.312		23.666		25.545	25.253			22.344	25.17	18.528	23.202			18.389
GM-CSF/IL-3 - γ (Sca1-/CD11b-)	174		25.136		27.952	26.024		23.166		27.159			26.084	23.754	24.699	24.586	26.908							26.284		25.195	21.893				25.122			24.869			26.907		28.522			26.881		23.147	20.523	23.779
GM-CSF/IL-3 - γ (Sca1-/CD11b-)	175	34.722	33.09	32.458				32.271								23.687	23.14	33.741		30.227	31.306					30.899	18.067				30.909	25.512					29.705	31.653	29.422		27.54			32.131	27.22				29.39
GM-CSF/IL-3 - γ (Sca1-/CD11b-)	176							26.873	23.206				33.146				25.942	29.941	27.045	23.632	22.229		26.23			27.701	28.302	23.871			31.356						29.666		19.524		26.203			23.84	25.421				33.254
GM-CSF/IL-3 - γ (Sca1-/CD11b-)	177	25.704	21.699			25.907		23.709	22.071				25.362	23.907		22.828	23.302		27.539	27.026	22.543			25.349		25.237	24.776				25.487	23.943			24.413		25.164	27.096	21.287			25.369		23.018	22.041				23.981
GM-CSF/IL-3 - γ (Sca1-/CD11b-)	178		21.155		25.287	25.364	28.265	28.791	22.843	25.273			26.159	24.897	26.317	23.096	24.698		23.507		21.291		25.517	25.574		25.738	23.081	25.39			26.577	24.978	25.434	24.712	24.457		23.043		21.62		26.274	25.683		26.505	22.966	24.122			25.43
GM-CSF/IL-3 - γ (Sca1-/CD11b-)	179	27.551	20.799		22.998	25.266		24.21	22.138				24.748	23.549		22.672	22.324	28.714	23.827	26.722	21.767		23.345	24.761		23.662	20.789	28.643			25.004	24.154		23.053	22.876		23.483	26.127	21.994		23.385	24.678		23.698	21.765	27.263			24.88
GM-CSF/IL-3 - γ (Sca1-/CD11b-)	180	25.236	22.58		23.047	25.445		24.607	21.017	26.046			25.116	23.506	25.989	22.75	22.327		23.446	25.581	23.018		23.419	25.412		24.32	21.091	25.6			26.014	23.364	26.059	22.219	23.026	28.003	23.734	25.181	22.495		23.288	25.792		24.784	21.246	25.238			25.827
GM-CSF/IL-3 - γ (Sca1-/CD11b-)	181	23.742	21.665		24.564	25.788		22.237	21.989	27.91				23.092	25.317	23.4	20.822	26.564	24.712	23.778	21.755		24.716	25.376		22.39	22.203					23.045	24.847	23.47	21.137	26.653	24.541	24.049	21.666		24.712	25.585		22.404	22.22
GM-CSF/IL-3 - γ (Sca1-/CD11b-)	182		23.649		24.692	24.722		23.948	22.749	27.499			27.099	23.327		23.251	21.174		25.872		23.899		24.49	25.095		24.295	23.274	26.697			28.084	23.256		23.641	21.609		26.373		23.482		24.631	25.491		24.415	23.125	26.338			27.499
GM-CSF/IL-3 - γ (Sca1-/CD11b-)	183	27.248	22.806		24.926	25.779		24.401	21.264	24.258			25.41	23.751		22.117	24.337	29.113	23.989	25.911	22.91		25.146	25.606		24.515	21.885	24.718			25.239	23.707			24.782	27.524	24.15	27.144	22.916		25.018	25.725		25.107	21.666	25.337			24.214
GM-CSF/IL-3 - γ (Sca1-/CD11b-)	184	23.853	19.697		21.575	23.32		21.163	20.294	23.199	26.58	26.059	21.949	20.246		20.829	21.237	26.452	21.874	23.436	19.919		21.581	22.64		21.569	20.571	23.175	25.819	26.309	22.347	21.609		20.797	21.471	26.409	21.311	23.964	21.594		21.829	23.322		21.07	22.125	23.879		26.526	22.366
GM-CSF/IL-3 - γ (Sca1-/CD11b-)	185		25.142		25.201			23.504					24.978			23.197	25.117		26.577		24.58		24.926			25.238	26.208				25.624			23.682	25.396		27.125		24.358		24.402			24.906	26.136				25.361
GM-CSF/IL-3 - γ (Sca1-/CD11b-)	186	24.471	18.033		23.29	25.55		24.956	22.511	25.993			25.363	22.168		23.369	24.145		24.456	24.667	18.366		23.772	27.026		24.181	22.153	25.05			24.495	22.627		22.718	23.542		23.913	23.922	18.342		23.581	26.119		23.584	23.436	26.698			24.583
GM-CSF/IL-3 - γ (Sca1-/CD11b-)	187	25.03	21.365		24.341	25.841		23.588	22.904				24.584	23.786		23.041	24.291	26.856	24.801	25.036	21.518		24.444	24.688		23.597	23.878				25.473	23.409	27.054	22.655	24.585	27.533	24.145	25.208	20.9		24.313	26.616		24.08	23.236				25.464
GM-CSF/IL-3 - γ (Sca1-/CD11b-)	188	25.373	22.338		23.909			25.715	21.867	26.188			25.211	24.127		22.187	23.184		23.371	25.32	22.321		24.24			25.349	21.927	26.03			25.748	23.86		22.102	22.51	28.856	23.644	25.737	22.521		23.699			25.138	22.077	27.498			25.228
GM-CSF/IL-3 - γ (Sca1-/CD11b-)	189	26.277	20.082		24.911			23.807	21.963	26.796			27.196	25.076		22.814	21.962	27.891	27.053	27.93	20.324		25.973			24.087	22.264	28.386			27.094	25.743		23	21.927	30.6	25.256	26.302	19.996		25.47			24.071	22.029	28.155			27.326
GM-CSF/IL-3 - γ (Sca1-/CD11b-)	190	20.931		25.5	27.363		23.106	22.83	25.56			25.762	23.789		22.911	26.137	27.896	23.937		21.459		25.318	28.526		23.588	22.534	25.096				24.339		23.636	25.371		24.081		21.18		25.187	27.343		24.083	22.944	24.653			25.799	24.091
GM-CSF/IL-3 - γ (Sca1-/CD11b-)	191	26.885	20.541		25.249	25.299		24.28	23.174	25.304			26.224	23.964		22.582	23.383		24.026	27.002	20.8		26.188	25.419		24.543	24.359	25.423			27.163	23.834		22.711	23.217		23.595	26.192	20.459		25.456	24.717		24.377	23.676	26.001			25.37
GM-CSF/IL-3 - γ (Sca1-/CD11b-)	192	25.819	19.765		23.71	24.978		26.223	22.159	25.324			24.105	23.942	26.601	21.734		28.042	23.255	25.582	19.788		23.475	24.952		23.988	21.642	26.299			25.214	23.926		21.596		27.944	23.155	25.349	19.918		23.578	25.108		24.728	21.992	27.019			24.014
GM-CSF/IL-3 - γ (Sca1-/CD11b-)	193		23.361		23.997	28.037		22.851	22.644	24.676			26.823	22.6		24.718	24.059		24.527		23.488		23.261	27.213		23.398	23.12	25.872			26.309	22.408		24.415	23.533		25.065		23.645		23.803	27.654		22.459	22.864	25.134			26.344
GM-CSF/IL-3 - γ (Sca1-/CD11b-)	194	26.067	21.295		24.732			28.358	22.269	25.83			24.944	25.036		24.298	23.763		24.608	25.78	21.475		24.672				22.798	25.418			24.576	24.567		24.009	23.542		24.182	25.919	21.402		24.282	26.645		29.261	22.36	24.908			25.079
GM-CSF/IL-3 - γ (Sca1-/CD11b-)	195	25.26	21.747		26.81	25.904	23.738	23.323	23.58	26.592			25.921	26.502		24.389	23.643		26.172	25.329	22.099		26.972	25.438	25.09	24.258	23.303	27.446			25.41	25.218		24.546	23.659		25.417	24.363	21.844		27.465	25.275	25.996	24.515	23.445				25.866
GM-CSF/IL-3 - γ (Sca1-/CD11b-)	196	24.063	24.275		27.64	27.083	24.439	25.548	23.198					25.369		23.873	24.314	27.173	24.798	25.975	24.311		28.343	28.155	25.825	24.764	23.138					24.986		23.797	23.792		24.285	25.593	24.177		28.616	27.126	24.382	24.629	22.755	23.134
GM-CSF/IL-3 - γ (Sca1-/CD11b-)	197		21.117		26.581	25.397		24.986	23.475				26.171	24.546		22.084	24.725		24.591		20.954		25.967	25.732		26.035	23.365				27.194	25.387		22.62	24.317		24.883		21.034		26.136	25.269		26.151	23.38				26.424
GM-CSF/IL-3 - γ (Sca1-/CD11b-)	198	27.878	20.199		24.95			28.063	23.134	25.167			25.094	23.515		23.164	25.692		24.616	27.192	20.401		24.772			29.135	23.156	26.428			24.993	23.155		23.505	25.328	28.98	24.707	28.131	20.232		24.761				23.153	26.037			25.331
GM-CSF/IL-3 - γ (Sca1-/CD11b-)	199	28.963	20.945		25.287	26.824		24.144	22.505	24.33			25.852	23.955		22.548	24.376		24.3		20.821		24.991	25.645		23.9	22.452	23.803			25.048	24.017		23.222	24.204		23.941		20.953		25.188	27.159		25.031	22.431	24.333			24.377
GM-CSF/IL-3 - γ (Sca1-/CD11b-)	200		21.705		22.644	25.143		23.999	23.557	26.261			25.544	23.719		23.836	22.786	27.887	24.328		21.33		23.11	25.447		24.34	23.227	25.24			25.517	23.427		23.788	23.073		24.75		21.518		22.938	26.014		25.098	23.356	26.145			24.858
GM-CSF/IL-3 - γ (Sca1-/CD11b-)	201	27.23	19.984		26.396	27.442		24.319	22.639	24.866			25.8	24.171		23.579	22.807		25.133	25.828	20.279		26.594	27.357		23.878	22.954	25.513			25.623	23.994		24.101	22.807		24.352	25.791	20.108		25.155	26.742		25.268	22.816	25.489			26.11
GM-CSF/IL-3 - γ (Sca1-/CD11b-)	202																												20.45	25.22					22.775	25.312	24.448		22.365		24.094	24.435			21.923	23.342	22.689	25.595	23.967
GM-CSF/IL-3 - γ (Sca1-/CD11b-)	203	25.011	22.754									21.676																22.079		22.593	21.339			22.195			23.144	25.552	21.705			24.937		31.713	22.546	23.466
GM-CSF/IL-3 - γ (Sca1-/CD11b-)	204								20.219							20.693	21.476				18.646		22.157	23.191			19.177	22.146			26.184	23.083	26.021				23.467		19.137		24.285				21.741	23.769			26.648
GM-CSF/IL-3 - γ (Sca1-/CD11b-)	205	22.414	20.462		23.455	25.049		24.309	22.68	24.388			23.593	23.889	24.717	22.207	23.074	26.551	22.877	24.089	20.029		23.991	25.406		23.332	21.37	25.57				24.107		21.53	22.578	27.608	23.362	24.994	20.142		24.171	25.084		24.42	20.713	25.757
GM-CSF/IL-3 - γ (Sca1-/CD11b-)	206	25.81	20.732		24.649			26.954	22.755					24.348	27.427	22.837	22.527		24.939	26.112	20.561		25.052			26.991	22.74					24.318	26.688	22.823	22.59		24.777	25.276	20.58		24.495			27.792	23.118
GM-CSF/IL-3 - γ (Sca1-/CD11b-)	207		18.997		25.926	28.173		26.536	22.956	28.44				23.98		22.423	21.973		25.008		19.142		26.612	26.044			22.557	26.271			27.149	24.137		22.449	22.325	29.179	25.064		19.22		25.773	26.226			22.574	28.184			28.108
GM-CSF/IL-3 - γ (Sca1-/CD11b-)	208	25.734	21.469		23.822	25.613		26.087	22.585	27.736			26.045	24.615		23.364	24.861	28.959	23.198		22.304		24.43	25.71		26.558	22.148				27.973	24.443		23.4	24.551		23.568	28.787	22.398		24.203	25.879		27.502	22.409				26.552
GM-CSF/IL-3 - γ (Sca1-/CD11b-)	209		22.164		25.157	25.611			22.789				24.225	25.742		23.277	23.473	28.028	24.408		22.235		25.954	26.169			22.818				25.098	25.65		23.445	23.189	26.374	24.004		22.306		26.573	26.294			22.703				24.777
GM-CSF/IL-3 - γ (Sca1-/CD11b-)	210	25.611	28.161		23.475			24.918	22.022					24.003		23.214	22.428		25.367	25.774	27.633		23.324			24.997	21.828	28.205			26.655	23.988		22.945	22.363		24.946	26.524	26.086		23.801			25.083	22.247	26.804			27.98
GM-CSF/IL-3 - γ (Sca1-/CD11b-)	211		23.544		29.035	26.121		26.187	23.59					26.436		25.584	26.607		25.863		23.833		28.999	25.529		27.06	23.643					26.137		24.983	25.589		25.757		23.849		29.073	25.633		28.459	23.364
GM-CSF/IL-3 - γ (Sca1-/CD11b-)	212		20.513		23.94	27.17		23.834	22.168	26.553			25.092	22.931		22.788	23.198		24.14		20.551		24.011	27.178		23.627	22.331	24.514			24.531	23.156		22.839	23.122		24.176		20.31		24.591	26.435		24.27	22.269	25.338			26.501
GM-CSF/IL-3 - γ (Sca1-/CD11b-)	213		21.534		24.028			25.85	22.58	25.856	27.921		23.92	23.305	24.913	23.926	22.557		24.093		21.677		24.535			24.741	22.692	25.494			24.511	23.075	24.275	23.161	22.472		24.005		21.375		24.761			26.128	22.721	24.651	25.359		23.86
GM-CSF/IL-3 - γ (Sca1-/CD11b-)	214	25.787	20.69		27.325	24.956		25.035	22.367				26.394	24.013		23.859			27.207	28.366	20.479		26.057	24.922			22.081				25.453	25.495		22.974	23.94	28.578	26.122	28.319	20.597		25.685	23.376		27.131	22.973				25.623
GM-CSF/IL-3 - γ (Sca1-/CD11b-)	215				25.704	27.845										24.15	23.868						26.56				22.158				25.392	25.354			24.419				22.971		26.515								26.922
GM-CSF/IL-3 - γ (Sca1-/CD11b-)	216	25.161	24.178		23.939	26.928		24.114	23.609	24.678			27.773	25.546		24.932	23.09	28.19	23.274	24.862	24.065		24.599	26.555		24.217	22.213	24.981	26.717		26.184	25.754		23.269	23.681		23.587	25.882	23.862	28.473	24.783	26.093		25.011	24.053	25.743	26.041		26.032
[truncated: 25 more columns]

## Sheet: 100-cell data
		There are 3 tech replicates/assay for each sample
		Technical Replicate 1																		Technical Replicate 2																		Technical Replicate 3
		Pu.1	Hba-a1	Egr2	ckit	TBP	CD11b	Runx1	Scl	EpoR	CEBPa	Gfi1	Eklf	cMyb	cJun	Fog1	Gata2	Fli1	Gata1	Pu.1	Hba-a1	Egr2	ckit	TBP	CD11b	Runx1	Scl	EpoR	CEBPa	Gfi1	Eklf	cMyb	cJun	Fog1	Gata2	Fli1	Gata1	sfpi1	Hba-a1	Egr2	ckit	TBP	CD11b	Runx1	Scl	EpoR	CEBPa	Gfi1	Eklf
EML - Sca1 LOW (L)	1	19.093	13.14	22.101	16.408	18.139	25.526	16.6	15.724	19.183	20.188		17.567	16.263	19.005	15.771	13.871	21.336	16.684	18.964	13.708	22.077	16.345	18.187	25.662	16.938	15.605	19.134	19.97		17.663	16.165	18.941	15.735	13.918	21.405	16.463	18.954	13.096	21.975	16.276	18.411	25.032	17.021	15.763	19.053	19.972		17.619
EML - Sca1 LOW (L)	2	19.578	15.496	22.071	17.755	19.217	25.627	16.927	16.843	20.254	24.494		19.365	17.346	22.136	16.727	14.834	22.338	17.634	19.817	15.224	22.016	17.702	19.207	25.343	17.207	16.42	20.45	24.456		19.37	17.26	21.952	16.804	14.97	22.682	17.753	19.705	15.108	22.043	17.668	19.462	25.862	16.97	16.237	20.234	24.326		19.089
EML - Sca1 LOW (L)	3	19.456	15.766	22.644	17.213	18.915	25.522	16.866	16.268	20.243	24.709		19.015	16.853	21.036	16.813	14.345	22.437	17.597	19.421	15.627	22.548	17.265	18.947	25.749	17.108	16.027	20.273	25.073		18.929	16.813	21.125	16.868	14.315	22.637	17.538	19.338	15.525	22.389	17.131	19.293	25.017	16.92	16.088	20.107	24.954		18.831
EML - Sca1 LOW (L)	4	19.752	15.343	23.324	17.794	19.446	26.169	17.596	16.337	20.082		28.092	19.19	17.158	24.548	17.411	14.954	22.915	17.706	19.741	15.531	23.354	17.732	19.371	26.147	17.797	16.726	20.054	26.798		19.185	17.191	24.429	17.419	15.096	22.979	17.866	19.941	15.607	23.557	17.663	19.528	26.214	17.53	16.637	20.134		28.019	19.236
EML - Sca1 LOW (L)	5	19.961	15.552	23.533	18.003	19.655	26.378	17.805	16.546	20.291	24.586		19.399	17.367	24.757	17.62	15.163	23.124	17.915	19.95	15.74	23.563	17.941	19.58	26.356	18.006	16.935	20.263	25.007		19.394	17.4	24.638	17.628	15.305	23.188	18.075	20.15	15.816	23.766	17.872	19.737	26.423	17.739	16.846	20.343	24.572		19.445
EML - Sca1 LOW (L)	6	19.796	16.106	22.984	17.553	19.255	25.862	17.206	16.608	20.583	25.049		19.355	17.193	21.376	17.153	14.685	22.777	17.937	19.761	15.967	22.888	17.605	19.287	26.089	17.448	16.367	20.613	25.413		19.269	17.153	21.465	17.208	14.655	22.977	17.878	19.678	15.865	22.729	17.471	19.633	25.357	17.26	16.428	20.447	25.294		19.171
EML - Sca1 MID (M)	1	18.593	20.144	23.825	14.862	18.251	21.937	16.773	16.425	20.701	23.796	21.693	21.319	15.008	21.636	16.671	13.326	19.921	18.318	17.7	19.959	23.828	15.077	18.721	22.332	16.393	15.145	20.265	23.645	21.717	21.479	15.369	21.998	17.023	13.962	19.723	18.588	17.279	20.282	23.272	14.265	18.173	22.358	17.564	16.241	20.361	23.932	22.005	21.517
EML - Sca1 MID (M)	2	17.018	22.305	21.096	14.926	18.875	22.441	16.082	16.785	21.785	24.785	21.789	20.478	15.785	23.604	16.485	13.79	20.994	20.43	17.48	22.929	21.23	14.888	20.415	22.109	16.073	16.666	21.591	24.211	21.613	20.773	15.451	23.4	16.092	13.074	20.652	20.921	17.582	22.805	21.767	14.398	18.902	22.365	16.3	17.252	21.745	23.986	21.552	20.6
EML - Sca1 MID (M)	3	18.611	20.489	22.025	13.881	20.314	25.865	18.352	15.846	21.741	24.754	22.48	20.463	16.77	25.154	17.216	14.541	21.383	24.382	17.41	20.473	23	14.705	19.05	24.465	18.349	15.609	21.785	24.456	22.354	19.149	16.778	24.311	17.6	14.336	20.457	25.11	18.864	20.206	23.062	15.436	20.494	23.165	19.498	15.584	21.949	24.222	22.308	19.226
EML - Sca1 MID (M)	4	17.777	21.056	22.629	14.915	18.826	21.596	16.455	14.966	21.275	24.471	22.122	21.259	15.575	22.803	16.909	14.022	19.766	18.925	17.742	21.014	22.161	14.955	18.776	21.438	16.349	15.203	21.331	24.696	21.646	21.136	15.623	23.203	16.978	14.104	20.025	19.003	17.667	20.761	22.283	14.881	18.826	21.659	16.331	15.154	20.891	24.73	21.853	21.256
EML - Sca1 MID (M)	5	18.114	22.114	20.425	15.139	19.048	21.12	16.64	14.81	22.239	24.461	22.592	22.764	16.05	21.862	17.497	14.362	20.489	19.436	18.098	21.966	20.553	15.234	19.061	21.033	16.858	15.174	22.454	24.572	22.725	22.851	15.868	22.004	17.57	14.243	20.726	19.385	17.915	21.879	20.46	15.168	19.122	21.05	16.771	14.995	22.197	26.34	22.476	22.83
EML - Sca1 MID (M)	6	17.427	21.006	22.829	14.855	18.966	22.506	16.725	14.746	21.756	24.742	22.722	21.559	15.775	23.803	17.509	14.456	20.156	19.425	17.771	20.914	22.461	14.745	18.976	22.418	16.489	15.103	21.754	24.782	21.746	21.756	15.823	23.703	17.478	14.183	20.455	19.403	17.567	20.471	22.453	14.911	18.726	22.659	16.451	15.414	21.841	24.453	21.753	21.856
EML - Sca1 HIGH (H)	1	15.612	19.22	20.298	12.766	16.297	20.456	13.875	12.509	19.031	22.977	18.78	24.344	14.157	19.912	15.601	12.874	18.805	18.662	15.708	19.31	20.414	12.576	16.525	20.274	14.172	13.256	19.317	22.438	18.691	24.897	14.182	20.066	15.557	13.007	18.62	18.739	15.539	19.363	20.284	12.678	16.498	20.591	14.071	12.996	19.081	22.875	18.664	24.405
EML - Sca1 HIGH (H)	2	16.474	19.893	20.029	13.642	17.015	19.557	14.411	13.26	20.154	23.017	19.535	27.227	14.911	20.298	16.123	13.398	19.344	19.478	16.602	19.864	19.948	13.517	16.994	19.639	14.696	13.859	20.24	23.1	19.402	27.483	14.979	20.513	16.204	13.541	19.381	19.439	16.427	19.998	19.888	13.391	17.279	19.867	14.671	13.867	20.266	23.097	19.15	27.157
EML - Sca1 HIGH (H)	3	15.678	18.637	20.114	12.505	16.111	19.343	13.722	12.91	19.29	21.781	18.699	22.987	14.108	19.895	15.372	12.865	18.489	18.091	15.552	18.54	20.059	12.43	15.877	19.563	13.897	12.773	19.091	21.486	18.654	22.311	14.218	20.081	15.454	13.021	18.53	18.014	15.631	18.493	20.288	12.483	16.463	19.744	13.887	13.009	19.211	21.395	18.952	22.972
[truncated: 147 more rows]
[truncated: 25 more columns]
